# Supplementary material for: Non-destructive insect metabarcoding for surveillance and biosecurity in citrus orchards: recording the good, the bad and the psyllids
Source: PeerJ. 2023 Aug 15;11:e15831. doi: 10.7717/peerj.15831 (PMC10437040; doi:10.7717/peerj.15831)
Supplement: Supplemental Information 1 — The table lists all the taxa (ASVs) recorded in this study. For each taxon, the ASV identification number, the associated COI sequence and the taxonomical identification obtained in this work are provided. Number of reads are reported for each sample and total number of reads are reported per taxon and per sample. Samples are ordered by week and subdivided by trap type. [file peerj-11-15831-s001.xlsx]

## Sheet: Sheet1
									Week 01																																				Week02
									Site01																					Site02				Site03	Site04										Site01
									Sentinel												Wind		Ground							Wind		Ground		Ground	Wind		Ground								Sentinel
ESV_ID	OTU	Phylum	Class	Order	Family	Genus	Species	Reads	K3LT8_220110001_ext1_pcr1	K3LT8_220110001_ext1_pcr2	K3LT8_220110002_ext1_pcr1	K3LT8_220110002_ext2_pcr1	K3LT8_220110003_ext1_pcr1	K3LT8_220110003_ext2_pcr1	K3LT8_220110004_ext1_pcr1	K3LT8_220110004_ext1_pcr2	K3LT8_220110005_ext1_pcr1	K3LT8_220110005_ext2_pcr1	K3LT8_220110006_ext1_pcr1	K3LT8_220110006_ext2_pcr1	K3LT8_220110007_ext1_pcr1	K3LT8_220110007_ext1_pcr2	K3LT8_220110008_ext1_pcr1	K3LT8_220110008_ext1_pcr2	K3LT8_220110009_ext1_pcr1	K3LT8_220110009_ext2_pcr1	K3LT8_220110010_ext1_pcr1	K3LT8_220110010_ext1_pcr2	K3LT8_220110011_ext1_pcr1	K3LT8_220110012_ext1_pcr1	K3LT8_220110012_ext1_pcr2	K3LT8_220110014_ext2_pcr1	K3LT8_220110015_ext2_pcr1	K3LT8_220110019_ext1_pcr2	K3LT8_220110021_ext1_pcr1	K3LT8_220110021_ext2_pcr1	K3LT8_220110022_ext1_pcr1	K3LT8_220110022_ext2_pcr1	K3LT8_220110023_ext1_pcr1	K3LT8_220110023_ext2_pcr1	K3LT8_220110024_ext1_pcr1	K3LT8_220110024_ext2_pcr1	K3LT8_220110025_ext1_pcr1	K3LT8_220110025_ext2_pcr1	Week02+AU:BZ	K3LT8_220106135_ext2_pcr1	K3LT8_220106136_ext1_pcr1	K3LT8_220106136_ext1_pcr2	K3LT8_220106137_ext1_pcr1
ASV001	ATTAGCTAGTGGTTTAGGACATCCTGGAAGTGCTATAGATTTTGCTATTTTTTCCTTACATTTAGCTGGAGCTTCATCTATTATAGGAGCTATTAATTTTATTTCTACTATTATTAATATACGGTGTATAGGGATAAGAATGGAGAAAGTTCCTCTATTTGTATGATCTGTTTTAATTACTGCTGTTTTATTGTTACTTTCTCTT	Arthropoda	Arachnida	Arachnida sp.	Arachnida sp.	Arachnida sp.	Arachnida sp.	468	0	0	0	0	0	0	0	0	0	0	0	0	0	0	0	0	0	0	0	0	0	0	0	0	0	0	0	0	0	0	0	0	0	0	0	0	0	0	0	0	0
ASV002	ATTAGCTAGTGGTTTAGGACATCCTGGAAGTGCTATAGATTTTGCTATTTTTTCTTTACATTTAGCTGGAGCTTCATCTATTATAGGAGCTATTAATTTTATTTCTACTATTATTAATATACGGTGTATAGGGATAAGAATGGAGAAAGTTCCTCTATTTGTATGATCTGTTTTAATTACTGCTGTTTTATTGTTACTTTCTCTT	Arthropoda	Arachnida	Araneae	Araneae sp.	Araneae sp.	Araneae sp. 01	82779	0	0	0	0	0	0	0	0	0	0	0	0	0	0	0	0	0	0	0	0	0	0	0	0	0	0	0	0	0	0	0	0	0	0	0	0	0	0	0	0	0
ASV003	TCTTGCTTCTACTGTAGGGCATATGGGAAGAGCTATAGATTTTGCTATTTTTTCATTACATTTGGCTGGAGCTTCATCAATTATAGGTGCAGTTAATTTTATTACTACTATTATTAATATACGTCCTGTAGGAATAACTATAGAAAGGATTCCTTTGTTTGTTTGGTCTGTATTAATTACTGCAGTTTTATTATTATTATCCTTA	Arthropoda	Arachnida	Araneae	Araneae sp.	Araneae sp.	Araneae sp. 02	9244	0	0	0	0	0	0	0	0	0	0	0	0	0	0	0	0	0	0	0	0	0	0	0	0	0	0	0	0	0	119	5045	0	0	0	0	0	0	0	0	0	0
ASV004	TTTAGCGTCAAGAATAGGTCATATAGGAAGTTCTATAGATTTTGCTATTTTTTCTCTTCATTTAGCTGGTGCTTCTTCGATTATGGGAGCTGTAAATTTTATTTCTACAATTATTAATATACGAATGTTAGGAATAAGAATAGAGAAAGTACCGTTGTTCGTATGATCTGTTTTGATTACTGCTGTTTTATTATTGCTTTCATTA	Arthropoda	Arachnida	Araneae	Araneae sp.	Araneae sp.	Araneae sp. 03	9768	0	0	0	0	0	0	0	0	0	0	0	0	0	0	0	0	0	0	0	0	0	0	0	0	0	0	0	0	0	0	0	0	0	0	0	0	0	0	0	0	0
ASV005	TTTGGCTTCAGTGGTAGGGCATGGTGGAAGATCAGTTGATTTTGCTATTTTTTCTCTACATTTGGCTGGTGCTTCTTCAATTATAGGGGCTATTAATTTTATTTCTACTGTAATTAATATGCGTTCTTCTAGAATAACTATAGATAAGGTTCCTTTATTTGTGTGATCAGTAGTAATTACTGCTGTTTTATTATTATTATCTTTG	Arthropoda	Arachnida	Araneae	Araneae sp.	Araneae sp.	Araneae sp. 04	2167	0	0	0	0	0	0	0	0	0	0	0	0	0	0	0	0	0	0	0	0	0	0	0	0	0	0	0	0	0	0	0	0	0	0	0	0	0	0	0	0	0
ASV006	TTTAGCTTCAATAATAGGTCATGCTGGTAGAGCTGTGGATTTTGCTATTTTTTCGTTACATTTAGCGGGTGCTTCTTCTATTATAGGGGCTATTAATTTTATTACTACTGTAGTAAATATACGATCTGTAGGAATAACAATAGAAAAGGTTCCTTTATTTGTTTGATCAGTAGTGATTACTGCTATTCTTTTATTATTATCTTTA	Arthropoda	Arachnida	Araneae	Araneae sp.	Araneae sp.	Araneae sp. 05	3112	0	0	0	0	0	0	0	0	0	0	0	0	0	0	0	0	0	0	0	0	0	0	0	0	0	0	0	0	0	0	0	0	0	0	0	0	0	0	0	0	0
ASV007	TTTAGCCTCTATTGTTGGTCATAATGGAAGATCTGTAGATTTTGCTATTTTTTCTTTACATTTAGCTGGGGCTTCTTCAATTATAGGGGCGATTAATTTCATTTCTACTGTTATCAATATACGATCAGTAGGAATATCTATGGATAAGGTTTCTTTATTTGTATGATCGGTTATAATTACTGCTGTTTTATTATTGTTGTCTTTA	Arthropoda	Arachnida	Araneae	Araneae sp.	Araneae sp.	Araneae sp. 06	215	0	0	0	0	0	0	0	0	0	0	0	0	0	0	0	0	0	0	0	0	0	0	0	0	0	0	0	0	0	0	0	0	0	0	0	0	0	0	0	0	0
ASV008	TCTTGCTTCTACTGTAGGTCATATGGGAAGAGCTATGGATTTTGCTATTTTTTCATTACATTTAGCTGGAGCTTCATCAATTATAGGTGCAGTTAATTTTATTACTACTATTATTAATATACGTTCTGTAGGGATAACTATGGAAAAGATTCCTTTATTTGTTTGATCTGTATTAATTACTGCTGTTTTATTATTGTTATCATTA	Arthropoda	Arachnida	Araneae	Araneae sp.	Araneae sp.	Araneae sp. 07	610	0	0	0	0	0	0	0	0	0	0	0	0	0	0	0	0	0	0	0	0	0	0	0	0	0	0	0	0	0	0	0	0	0	0	0	0	0	0	279	331	0
ASV010	TTTAGCAGGAAGTATAGGGCATCCTGGTAGAGCTATGGATTTTGCTATTTTTTCTTTACATTTGGCTGGTGCTTCTTCAATTATAGGTGCTATTAATTTTATTTCTACAATTATTAATATACGATGTATAGGAATAAGAATAGAAAAGGTTCCATTGTTTGTTTGATCTGTATTAATTACGGCTGTTTTATTATTGCTTTCTTTA	Arthropoda	Arachnida	Araneae	Araneae sp.	Araneae sp.	Araneae sp. 09	185	0	0	0	0	0	0	0	0	0	0	0	0	0	0	0	0	0	0	0	0	0	0	0	0	0	0	0	0	0	0	0	0	0	0	0	0	0	0	0	0	0
ASV011	TTTGGCTTCTATTACAGGTCATTCTGGTAGATCTGTAGATTTTGCTATTTTTTCTCTTCATTTAGCTGGTGCTTCCTCAATTATAGGGGCTATTAATTTTATTTCTACTATTGTGAATATACGAATAGAAGGAATAAGAATGGAAAAGGTTCCTTTATTTGTTTGATCAGTATTGATTACTGCTGTGTTATTGTTATTATCTCTT	Arthropoda	Arachnida	Araneae	Araneae sp.	Araneae sp.	Araneae sp. 10	96	0	0	0	0	0	0	0	0	0	0	0	0	0	0	0	0	0	0	0	0	0	0	0	0	0	0	0	0	0	0	0	0	0	0	0	0	0	0	0	0	0
ASV012	TTTATCTTCTTTAATAGGACATTCTGGGAGATCTGTAGATTTTGCTATTTTTTCTCTTCATTTGGCTGGGGTTTCTTCTATTATAGGGGCAATTAATTTTATTTCTACTATTATTAATATACGGTTATTGAGTATAACTATAGAAAAGGTTCCTTTATTTGTTTGATCTGTATTGATTACTGCTGTATTATTATTATTATCTCTA	Arthropoda	Arachnida	Araneae	Araneae sp.	Araneae sp.	Araneae sp. 11	88	0	0	0	0	0	0	0	0	0	0	0	0	0	0	0	0	0	0	0	0	0	0	0	0	0	0	0	0	0	0	0	0	0	0	0	0	0	0	0	0	0
ASV013	TTTAGCTTCAACTATTGGGCATGCTGGATCTTCAGTGGACTTTGCTATTTTTTCTTTACATTTAGCTGGTGCTTCTTCTATTATAGGGGCGATTAATTTTATTACTACTATTATTAATATACGGTCTGTTGGAATGAGAATGGAAAAAGTTCCTTTATTTGTTTGGTCTGTTTTAGTTACTGCTATTTTATTGTTGTTGTCTTTA	Arthropoda	Arachnida	Araneae	Araneae sp.	Araneae sp.	Araneae sp. 12	82	0	0	0	0	0	0	0	0	0	0	0	0	0	0	0	0	0	0	0	0	0	0	0	0	0	0	0	0	0	0	0	0	0	0	0	0	0	0	0	0	0
ASV014	ATTGGCTTCAGGAATAGGACATGCTGGAAGAGCTGTGGATTTTGCAATTTTTTCTTTACATTTAGCTGGAGCTTCATCAATTATAGGTGCTATTAATTTTATTACTACTGTAATTAATATGCGTTCTTGTGGAATATCTATGGAAAAGGTTCCCTTATTTGTTTGGTCAGTTGTAATTACAGCTGTATTATTATTATTATCTTTA	Arthropoda	Arachnida	Araneae	Araneae sp.	Araneae sp.	Araneae sp. 13	62	0	0	0	0	0	0	0	0	0	0	0	0	0	0	0	0	0	0	0	0	0	0	0	0	0	0	0	0	0	0	0	0	0	0	0	0	0	0	0	0	0
ASV015	TTTATCTTCTTTGGAAGGTCATTCTGGGAGATCTATGGATTTTGCAATTTTTTCTTTACATTTAGCGGGAGCTTCTTCTATTATAGGGGCTATTAATTTTATTTCAACTATTTTAAATATACGATCTTATGGGATTTCTTTAGAAAAAATTTCTTTATTTGTTTGGTCAGTATTGATTACAGCTATTTTATTATTATTATCTTTA	Arthropoda	Arachnida	Araneae	Araneae sp.	Araneae sp.	Araneae sp. 14	5242	0	0	0	0	0	0	0	0	0	0	0	0	0	0	0	0	0	0	0	0	0	0	0	0	0	0	0	0	0	0	0	0	0	0	0	0	0	0	0	0	0
ASV017	TCTTGCTTCAACTGTAGGTCATATGGGTAGAGCAATAGATTTTGCTATTTTTTCTTTACATTTAGCTGGTGCTTCTTCTATTATAGGGGCAGTTAATTTTATTACTACTATTATTAATATACGATCTGTTGGAATAACTATAGAAAAAATTCCGTTATTTGTATGATCAGTATTAATTACAGCTGTATTATTGTTATTATCATTA	Arthropoda	Arachnida	Araneae	Araneae sp.	Araneae sp.	Araneae sp. 16	55	0	0	0	0	0	0	0	0	0	0	0	0	0	0	0	0	0	0	0	0	0	0	0	0	0	0	0	0	0	0	0	0	0	0	0	0	0	0	0	0	0
ASV022	TTTATCTTCTTTAGAAGGACATTTTGGAAGATCTATAGATTTTGCTATTTTTTCTTTGCATTTAGCAGGAGCTTCTTCTATTATAGGAGCTATTAATTTTATTTCTACTATTTTAAATATACGTTTGTATGGAATATCGTTTGAAAAAATATCATTATTTGTTTGGTCAGTTTTTATTACTGCTATTTTATTATTGCTTTCTTTA	Arthropoda	Arachnida	Araneae	Araneae sp.	Araneae sp.	Araneae sp. 21	1841	0	0	852	0	0	0	449	540	0	0	0	0	0	0	0	0	0	0	0	0	0	0	0	0	0	0	0	0	0	0	0	0	0	0	0	0	0	0	0	0	0
ASV023	TTTATCTTCTTTAGATGGTCATGCAGGAAGTTCAGTAGATTTTGCTATTTTTTCTTTACATTTAGCTGGTGCTTCTTCTATTATAGGAGCAATTAATTTTATTTCAACAATTTTAAATATACGTTCTTATGGAATAAGATTTGAAAAAATTTCTTTATTTGTTTGGTCTGTATTAATTACAGCAGTATTATTATTATTATCTCTT	Arthropoda	Arachnida	Araneae	Araneae sp.	Araneae sp.	Araneae sp. 22	709	0	0	0	0	0	0	0	0	0	0	0	0	0	0	0	0	0	0	0	0	0	0	0	0	0	0	0	0	0	0	0	0	0	0	0	0	0	0	0	0	0
ASV024	TTTATCTTCTTTAGAAGGACATGCGGGTAGGTCTGTGGATTTTGCTATTTTTTCTTTACATTTAGCTGGGGCTTCTTCTATTATAGGGGCTGTTAATTTTATTTCTACTATTTTTAATATGCGTTCATATGGAATGAGAATGGAAAAAGTAAGTTTATTTGTTTGATCTGTTTTAATTACTGCCGTTTTATTATTATTATCTTTG	Arthropoda	Arachnida	Araneae	Araneae sp.	Araneae sp.	Araneae sp. 23	134	0	0	0	0	0	0	0	0	0	0	0	0	0	0	0	0	0	0	0	0	0	0	0	0	0	0	0	0	0	0	0	0	0	0	0	0	0	0	0	0	0
ASV025	TTTATCTTCTTTAGAAGGACATGCTGGTAATTCTGTTGATTTTGCTATTTTTTCTTTGCATTTAGCTGGTGCTTCTTCAATTATAGGAGCTGTAAATTTTATTTCTACTATTTTTAATATACGGATATATGGAATAAGATTTGAAAAAGTTTCTTTATTTGTTTGATCTGTTTTAATTACTGCTGTATTATTATTATTATCTTTA	Arthropoda	Arachnida	Araneae	Araneae sp.	Araneae sp.	Araneae sp. 24	3880	0	0	0	0	0	0	0	0	0	0	0	0	0	0	0	0	0	0	0	0	0	0	0	0	0	0	0	0	0	0	0	0	0	0	0	0	0	0	0	0	0
ASV026	TTTGTCTTCTGTTGAAGGCCATTCTGGGAGTTCAGTAGATTTTGCTATTTTTTCTCTTCATTTAGCGGGGGCTTCTTCTATTATAGGGGCTATTAATTTTATTACTACTATTTTGAATATGCGGATGGAGGGAATAAGTATGGAAAAAGTTCCTTTATTTGTTTGATCGGTTTTAATTACTGCTGTTTTATTGTTATTGTCTTTG	Arthropoda	Arachnida	Araneae	Araneae sp.	Araneae sp.	Araneae sp. 25	4467	0	0	0	0	0	0	0	0	0	0	0	0	0	0	0	0	0	0	0	0	0	0	0	0	0	0	0	0	0	0	0	0	0	0	0	0	0	0	0	0	703
ASV027	GTTAGCTTCCATTGTGGGTCATGCTGGATCTGCAGTGGATTTTGCTATTTTTTCTTTACATTTAGCGGGTGCTTCTTCTATTATGGGAGCAGTTAATTTTATTTCTACCATTATTAATATGCGATCTGTGGGTATAACTATGGAAAAGGTACCTTTATTTGTTTGATCAGTATTGATTACGGCTATTTTGTTATTGTTGTCATTG	Arthropoda	Arachnida	Araneae	Araneae sp.	Araneae sp.	Araneae sp. 26	197475	0	0	0	0	0	0	0	0	0	0	0	0	0	0	0	0	0	0	0	0	0	0	0	0	0	0	0	0	0	0	0	0	0	0	0	0	0	0	0	0	0
ASV028	ATTAGCTAGTGGTTTAGGACATCCTGGAAGTGCTATAGATTTTACTATTTTTTCTTTACATTTAGCTGGAGCTTCATCTATTATAGGAGCTATTAATTTTATTTCTACTATTATTAATATACGGTGTATAGGGATAAGAATGGAGAAAGTTCCTCTATTTGTATGATCTGTTTTAATTACTGCTGTTTTATTGTTACTTTCTCTT	Arthropoda	Arachnida	Araneae	Araneae sp.	Araneae sp.	Araneae sp. 27	1922	0	0	0	0	0	0	0	0	0	0	0	0	0	0	0	0	0	0	0	0	0	0	0	0	0	0	0	0	0	0	0	0	0	0	0	0	0	0	0	0	0
ASV029	TTTAGCATCTTTAGAAGGTCATTCAGGGAGTTCAGTTGATTTTGCAATTTTTTCTTTACATTTAGCAGGGGCTTCTTCAATTATAGGGGCTATTAATTTTATTTCAACCATTATAAATATACGTTCTTATGATATTGGGATGGAAAAGATTTCTTTATTTGTTTGGTCCGTATTAATTACGGCTGTTTTACTACTTTTATCTTTA	Arthropoda	Arachnida	Araneae	Araneae sp.	Araneae sp.	Araneae sp. 28	282	0	0	154	0	0	0	0	0	0	0	0	0	0	0	0	0	0	0	0	0	0	0	0	0	0	0	0	0	0	0	0	0	0	0	0	0	0	0	0	0	0
ASV030	TTTAGCATCGATTGTAGGTCATAATGGAAGATCGGTGGATTTTGCTATTTTTTCTTTACATTTAGCAGGTGCCTCATCGATTATAGGAGCTATTAATTTTATTTCTACTGTAATTAATATACGTTCAGTAGGAATATCTATAGATAAAGTTTCTTTGTTTGTGTGATCAGTATTGATTACAGCCGTTTTGTTATTATTATCTTTA	Arthropoda	Arachnida	Araneae	Araneae sp.	Araneae sp.	Araneae sp. 29	121	0	0	0	0	0	0	0	0	0	0	0	0	0	0	0	0	0	0	0	0	0	0	0	0	0	0	0	0	0	0	0	0	0	0	0	0	0	0	0	0	0
ASV031	TTTATCTAGATTAGAAGGTCATGCTGGAAGATCAGTAGATTTTGCTATTTTTTCTTTACATTTAGCTGGTGCTTCTTCAATTATGGGGGCAATTAATTTTATTTCTACCATTATTAATATGCGATTTTATGGAATGACGATAGAAAAGGTTCCTTTATTTGTTTGATCTGTATTAATTACTGCTGTTCTTTTATTATTATCATTA	Arthropoda	Arachnida	Araneae	Araneidae	Argiope	Argiope protensa	2232	0	0	0	0	0	0	0	0	0	0	0	0	0	0	0	0	0	0	0	0	0	0	0	0	0	0	0	0	0	0	0	0	0	0	0	0	0	0	0	0	0
ASV034	TTTAGCTGGATTAGAAGGTCATGCAGGGAGATCTGTAGATTTTGCTATTTTCTCTCTTCATTTAGCAGGTGCTTCATCTATTATAGGAGCAATTAATTTTATTTCTACAATTATTAATATACGGTTTTATGGAATAACAATAGAAAAGGTTCCTTTATTTGTTTGATCTGTCTTAATTACGGCTGTTTTACTTCTTTTATCATTA	Arthropoda	Arachnida	Araneae	Araneidae	Gea	Gea theridioides	322	0	0	0	0	0	0	0	0	0	0	0	0	0	0	0	0	0	0	0	0	0	0	0	0	0	0	0	0	0	0	0	0	0	0	0	0	6	0	0	0	0
ASV035	TTTAGCTTCTGTAATAGGACATGCTGGAAGATCTGTTGATTTTGCAATTTTTTCTTTACATTTAGCTGGTGTATCTTCAATTATAGGGGCAATTAATTTTATTTCAACGATTATTAATATACGGTTGTTTAGAATAACTATAGAAAAGGTTCCTTTATTTGTATGGTCAGTATTAATTACTGCTATTTTATTATTATTATCTTTA	Arthropoda	Arachnida	Araneae	Cheiracanthiidae	Cheiracanthium	Cheiracanthium sp.	219218	0	0	0	0	0	0	0	0	0	0	0	0	0	0	0	0	0	0	0	0	0	0	0	0	0	0	0	0	0	0	0	0	0	0	0	0	0	0	170	191	0
ASV036	TTTGGCTTCTATTATTGGGCATGGTGGTAATGCTATAGATTTTGCTATTTTTTCGTTGCATTTAGCTGGTGCATCTTCTATTATGGGGGCGGTAAATTTTATTTCTACTATTATTAATATACGATCGGTTGGGATAAGAATAGAAAGGGTACCTTTATTTGTATGATCTGTTTTAATTACGGCTGTATTGTTACTTCTTTCATTG	Arthropoda	Arachnida	Araneae	Gnaphosidae	Gnaphosidae sp.	Gnaphosidae sp.	29962	0	0	27	0	0	0	0	0	0	0	0	0	0	0	0	0	0	0	0	0	0	0	0	0	0	0	0	0	0	0	0	0	0	0	0	0	0	0	0	0	0
ASV038	TCTTGCTGGGAGTATAGGTCATTCTGGAAGTGCTATAGATTTTGCTATTTTTTCGTTACATTTGGCTGGTGCTTCTTCTATTATAGGAGCTATTAATTTTATTTCTACTATTATTAATATACGATATATTGGGATGAGAATGGAAAAGGTTCCATTGTTTGTATGATCTGTTTTAATTACAGCTGTACTGTTATTATTATCTTTG	Arthropoda	Arachnida	Araneae	Lamponidae	Lampona	Lampona murina	1418	0	0	0	0	0	0	0	0	0	0	0	0	0	0	0	0	0	0	0	0	0	0	0	0	0	0	0	0	0	0	0	0	0	0	0	0	0	0	0	0	0
ASV039	TCTTGCTGGAAGTATAGGTCATTCTGGAAGCGCTATAGATTTTGCTATTTTTTCGTTACATTTGGCTGGTGCTTCTTCTATTATAGGAGCTATTAATTTTATTTCTACTATTATCAATATACGATGTATTGGAATGAGAATGGAAAAAGTTCCATTGTTTGTATGATCTGTTTTAATTACAGCTGTATTGTTATTATTATCTTTG	Arthropoda	Arachnida	Araneae	Lamponidae	Lampona	Lampona nr murina	43009	0	0	0	0	0	0	0	0	0	0	0	0	0	0	0	0	0	0	0	0	0	0	0	0	0	0	0	0	0	0	0	0	0	0	0	0	0	0	0	0	0
ASV040	TATTGCGTCTTTAGAAGGTCATTCTGGAAGTTCTGTTGATTTTGCTATTTTTTCTTTACATTTAGCAGGGGCTTCTTCAATTATAGGGGCTATTAATTTTATTTCTACAATTTTAAATATACGTGGTTATGGAATAACTATAGAGAAGGTACCATTATTTGTTTGGTCTGTTTTAATTACAGCTGTTTTACTTTTATTATCTTTA	Arthropoda	Arachnida	Araneae	Linyphiidae	Agyneta	Agyneta sp.	3040	0	0	0	0	0	0	0	0	0	0	0	0	0	0	0	0	0	0	0	0	0	0	0	0	0	0	0	0	0	34	1736	0	0	0	0	0	0	0	0	0	0
ASV041	TTTAGCTTCTTTAGAGGGCCATTCTGGTAGTTCTGTTGATTTTGCAATTTTTTCTTTACATTTAGCTGGTGCTTCTTCTATTATAGGGGCTATCAATTTTATTTCCACGATTTTGAATATACGTGGGTATGGAATAACTATAGAGAAAGTGCCTTTATTTGTATGATCAGTTTTAATTACAGCTGTGTTATTATTATTATCTTTG	Arthropoda	Arachnida	Araneae	Linyphiidae	Erigone	Erigone sp. 01	5191	0	0	0	0	23	0	0	0	0	0	0	0	0	0	0	0	0	0	0	0	0	0	0	0	0	0	0	0	0	0	0	0	0	0	0	0	0	0	0	0	0
ASV042	TTTAGCTTCTTTAGAGGGTCATTCTGGTAGTTCTGTTGATTTTGCAATTTTTTCTTTACATTTAGCTGGTGCTTCTTCTATTATAGGGGCTATCAATTTTATTTCCACGATTTTAAATATACGCGGGTATGGAATAACTATAGAGAAAGTGCCTTTATTTGTATGATCAGTTTTAATTACAGCTGTGTTATTATTATTATCTTTG	Arthropoda	Arachnida	Araneae	Linyphiidae	Erigone	Erigone sp. 02	10385	0	0	0	0	0	0	0	0	0	0	0	0	0	0	0	0	0	0	0	0	0	0	0	0	0	0	0	0	0	0	0	0	0	0	0	0	1	0	219	181	0
ASV043	TTTAGCTTCTAGAGTAGGTCATATAGGAAGTTCTATAGATTTTGCTATTTTTTCGTTACATTTAGCAGGTGCTTCTTCTATTATAGGAGCTATTAATTTTATTACTACTATTATTAATATACGTTTAGTTGGAATAAGAATAGAGAAAATTCCTTTATTCGTTTGGTCTGTTTTTATTACTGCTATTTTATTATTATTATCATTA	Arthropoda	Arachnida	Araneae	Lycosidae	Artoriopsis	Artoriopsis expolita	7471	0	0	4	0	0	0	0	0	8	0	0	0	7	90	0	0	0	0	0	0	0	0	0	0	0	0	0	0	0	0	0	0	0	0	0	0	4	0	0	0	0
ASV044	TTTGGCATCTAGAGTAGGTCATATGGGGAGTTCTATAGATTTTGCTATTTTTTCTTTACATTTGGCTGGGGCTTCTTCTATTATAGGGGCAGTGAATTTTATTTCTACAATTATTAATATGCGAATATTAGGAATATCAATGGAAAAGGTACCTTTGTTTGTTTGATCTGTTTTAATTACTGCTGTTTTATTGTTACTTTCGTTA	Arthropoda	Arachnida	Araneae	Lycosidae	Hogna	Hogna crispipes	9643	0	0	0	0	0	0	0	0	0	0	0	0	0	0	0	0	0	0	0	0	0	0	0	0	0	0	0	0	0	0	0	0	0	0	0	0	0	0	0	0	0
ASV045	TTTAGCTTCTAGAGTAGGTCATATGGGAAGTTCTATAGATTTTGCTATTTTTTCTCTTCATTTAGCTGGGGCTTCTTCAATTATAGGAGCTGTTAATTTTATTTCTACTATTATTAATATACGGATATTAGGAATAACTATAGAAAGGGTTCCGTTGTTTGTTTGGTCAGTATTAATTACTGCTATTTTATTGTTACTTTCTTTA	Arthropoda	Arachnida	Araneae	Lycosidae	Lycosidae sp.	Lycosidae sp. nr DQ295868.1	1605	0	0	0	0	0	0	0	0	0	0	0	0	0	0	0	0	0	0	0	0	0	0	0	0	0	0	0	0	0	0	0	0	0	0	0	0	0	0	0	0	0
ASV046	TTTGGCGTCAAGAGTGGGTCATATAGGAAGTTCTATGGATTTTGCTATTTTTTCTCTTCATTTAGCTGGGGCTTCTTCTATTATAGGGGCTGTTAATTTTATTTCTACAATTATTAATATACGGATATTAGGAATAACTATAGAAAAGGTTCCTTTATTTGTTTGGTCTGTTTTAATTACTGCTGTTTTGTTATTACTTTCTTTA	Arthropoda	Arachnida	Araneae	Lycosidae	Venator	Venator spenceri	288	0	0	0	0	0	0	0	0	288	0	0	0	0	0	0	0	0	0	0	0	0	0	0	0	0	0	0	0	0	0	0	0	0	0	0	0	0	0	0	0	0
ASV047	TTTAGCATCATTAGAAGGACATGCTGGAAGATCAGTGGATTTTGCAATTTTTTCTCTTCATTTAGCAGGTGCATCTTCAATTATAGGAGCTATTAATTTTATTTCTACTATTTTAAATATACGGTCTTATGGAATAACTATAGAGAAAGTACCTTTATTTGTTTGGTCAGTTTTAATTACTGCTGTTTTATTGTTATTATCTTTA	Arthropoda	Arachnida	Araneae	Nephilidae	Nephila	Nephila edulis	709	0	0	0	0	0	0	0	0	0	0	0	0	0	0	0	0	0	0	0	0	0	0	0	0	0	0	0	0	0	0	0	0	0	0	0	0	0	0	0	0	0
ASV048	TTTAGCTTCAACTACTGGGCATATAGGAAGATCAATGGATTTTGCTATTTTTTCTTTACATTTAGCTGGGGCTTCTTCTATTATAGGGGCAGTAAATTTTATTTCGACTATTATTAATATACGATTAAGTAGAATAAGAATGGAAAAGGTACCTTTATTTGTATGGTCGGTTTTTATTACTGCTATTTTATTACTTTTATCTTTA	Arthropoda	Arachnida	Araneae	Oxyopidae	Oxyopes	Oxyopes sp.	68692	0	0	0	0	0	0	0	0	0	0	0	0	0	0	0	0	0	0	0	0	0	0	0	0	0	0	0	0	0	0	0	0	0	0	0	0	0	0	160	169	216
ASV049	TTTGGCTTCTGTTGTTGGTCATAATGGTAGATCTGTGGATTTTGCTATTTTTTCTTTACATTTAGCTGGAGCTTCTTCAATTATAGGGGCTATTAATTTTATTTCTACTGTAATTAATATACGTTCAGTTAATATATCTTTAGATAAAATTCCGTTGTTTGTGTGATCTGTGGTTATTACGGCTGTTTTATTATTATTATCATTA	Arthropoda	Arachnida	Araneae	Salticidae	Holoplatys	Holoplatys sp.	94	0	0	0	0	0	0	0	0	0	0	0	0	0	0	0	0	0	0	0	0	0	0	0	0	0	0	0	0	0	0	0	0	0	0	0	0	0	0	0	0	0
ASV050	TTTAGCATCTGTAGTAGGCCATAGAGGAAGATCAGTAGATTTTGCAATTTTTTCTTTACATTTAGCTGGGGCTTCATCTATTATAGGAGCTATTAATTTTATTTCTACTGTAATTAATATACGATCTATTGGTATATCTATAGATAAAATTTCTTTATTTGTATGATCTGTGGTTATTACTGCTGTTTTATTACTATTATCTTTA	Arthropoda	Arachnida	Araneae	Salticidae	Maratus	Maratus splendens	82	0	0	0	0	0	0	0	0	0	0	0	0	0	0	0	0	0	0	0	0	0	0	0	0	0	0	0	0	0	0	0	0	0	0	0	0	0	0	0	0	0
ASV052	TTTGGCTTCATCTATAGGACATGCTGGTAGATCAGTGGATTTTGCTATTTTTTCTTTGCATTTAGCTGGTGCTTCTTCTATTATAGGGGCTATTAATTTTATTTCTACTGTAATTAATATACGGTCACCTGGAATAAGAATGGAAAAAGTTCCTTTATTTGTATGATCAGTATTAATTACAGCTGTTTTATTATTGTTGTCTTTA	Arthropoda	Arachnida	Araneae	Sparassidae	Isopeda	Isopeda vasta	358	0	0	0	0	0	0	0	0	0	0	0	0	0	0	0	0	0	0	0	0	0	0	0	0	0	0	0	0	0	0	0	0	0	0	0	0	0	0	0	0	0
ASV053	GCTGGCTTCTTTAGAAGGTCATTCGGGTAGTTCAGTTGATTTTGCTATTTTTTCTTTACATTTGGCGGGTGCTTCTTCTATTATAGGTGCAATTAATTTTATTTCTACTATTATTAATATGCGAATAAGAGGGGTAAGAATAGAAAAAGTTCCTCTTTTTGTTTGATCAGTTCTTATTACTGCTGTTTTGCTTCTTTTGTCTTTA	Arthropoda	Arachnida	Araneae	Tetragnathidae	Tetragnatha	Tetragnatha nitens	7594	0	0	0	0	0	0	0	0	0	0	0	0	0	0	0	0	0	0	0	0	0	0	0	0	0	0	0	0	0	0	0	0	0	0	0	0	0	0	0	0	0
ASV056	TTTATCTTCTTTGGATGGTCATAGAGGTAGATCTGTAGATTTTGCTATTTTTTCTCTACATTTGGCTGGAGCTTCTTCTATTATGGGAGCTGTAAATTTTATTTCTACTGTATTAAATATACGTTCATATGGAATAACAATGGAAAAAGTTCCTTTATTTGTATGATCAGTATTAATTACTGCTGTTTTATTACTATTATCTTTA	Arthropoda	Arachnida	Araneae	Theridiidae	Cryptachaea	Cryptachaea veruculata	9562	0	0	0	0	0	0	0	0	0	0	0	0	1	1	0	0	0	0	0	0	0	1	0	0	0	0	0	0	0	0	0	0	0	0	0	0	0	0	79	82	0
ASV057	TTTGTCAAGATTAGAGGGTCATAGAGGGAGATCTGTGGATTTTGCTATTTTTTCCTTGCATTTGGCAGGTGCTTCTTCTATTATAGGGGCTATTAATTTTATTTCTACTATTTTAAACATACATTTAGTAGGGGTTTCGATAGAAAAGGTAAGATTATTTGTCTGGTCAGTGTTGATCACTGCGGTATTATTATTGTTATCATTA	Arthropoda	Arachnida	Araneae	Theridiidae	Latrodectus	Latrodectus hasselti	426	0	0	0	0	0	0	0	0	5	0	0	0	0	0	0	0	0	0	0	0	0	0	0	0	0	0	0	0	0	0	0	0	0	0	0	0	0	0	0	0	0
ASV061	TTTAGCTTCTTCAATTGGTCATGCTGGTAGAGCTATGGATTTTGCAATTTTTTCTTTACATTTAGCTGGTGCTTCATCTATTATGGGTGCGGTAAATTTTATTTCTACTATTATTAATATACGAGGTATTGGTATAACAATGGAAAAAGTTCCTTTGTTTGTATGATCAGTTTTTATTACTGCTATTTTATTACTTTTGTCTTTG	Arthropoda	Arachnida	Araneae	Trochanteriidae	Hemicloea	Hemicloea sp. 01	4977	0	0	0	0	0	0	0	0	0	0	0	0	0	0	0	0	0	0	0	0	0	0	0	0	0	0	4671	0	0	0	0	0	0	0	0	0	0	0	0	0	0
ASV062	ATTAGCTTCATCAATGGGCCATGCTGGGAGAGCAATAGATTTTGCTATTTTTTCTTTACATTTAGCTGGTGCTTCTTCTATTATAGGGGCGGTTAATTTTATTTCAACTATTATTAATATACGAAGAATAGGAATAAGAATAGAAAAAGTTCCTTTATTTGTATGATCAGTATTTATTACTGCTATCTTATTACTTTTATCTTTA	Arthropoda	Arachnida	Araneae	Trochanteriidae	Hemicloea	Hemicloea sp. 02	30	0	0	0	0	0	0	0	0	0	0	0	0	0	0	0	0	0	0	0	0	0	0	0	0	0	0	0	0	0	0	0	0	0	0	0	0	0	0	0	0	0
ASV063	CTTAGCTAACAATATCTCTCACAGAGGAGGGGCTGTAGACTTAGCTATCTTTAGCCTACATCTAGCCGGTATTTCCTCCATCCTTGGTAGAATTAATTTTATTACCACAATTATTAATATACGCCCTCAAATAATAAAACTAGAACAAATACCTCTTTTTGTATGATCTGTCTTAATCACCACAGTCCTCCTCCTCTTATCCCTT	Arthropoda	Arachnida	Mesostigmata	Macrochelidae	Macrocheles	Macrocheles merdarius	8	0	0	0	0	0	0	0	0	0	0	0	0	0	0	0	0	0	0	0	0	0	0	0	0	0	0	0	0	0	0	0	0	0	0	0	0	0	0	0	0	0
ASV066	CTAACTTCAATTCAATATTTTATGTCTTCCTCTATTGAAATAATAATTTTTTCTTTACATATTGCAGGAATTTCTTCAATTGCCAGATCTATTAATTTTATTTCAACTATCCTATTAATAAAAAATAAAAATTATTTTTTAAGAAATTTAACTTTATTTTCTTTATCAATTTTAATTACTACATTTTTACTTTTATTAGCATTA	Arthropoda	Arachnida	Trombidiformes	Tetranychidae	Tetranychus	Tetranychus urticae	771	0	0	0	0	0	0	0	0	0	0	0	0	0	0	0	0	0	0	0	0	0	0	0	0	0	0	0	0	0	0	0	0	0	0	0	0	0	0	0	0	0
ASV068	ACTCGCAAGTGCTATCGCCCATGCTGGTGCATCAGTGGATTTAGCAATTTTTTCTCTACATTTAGCCGGAATTTCATCAATTTTAGGGGCAGTAAACTTTATTTCAACAATTATTAATATAAAACCAACATTTATAAAACCTGAACAAATCCCATTGTTTGTATGAGCAGTTGGTATTACAGCTTTATTACTTTTATTATCTCTA	Arthropoda	Insecta	Blattodea	Ectobiidae	Balta	Balta scripta	15005	16	23	14	16	19	19	8	21	32	12	36	18	130	1514	80	99	129	1113	10	16	20	386	797	0	0	0	414	2036	85	132	473	21	527	213	157	27	0	8	0	0	0
ASV069	TTTATCAGCAAATATTGCTCATAGAGGATCCTCAGTAGATCTAGCAATTTTTAGTCTTCACCTTGCAGGGATTTCTTCGATTCTTGGAGCAGTTAATTTTATTACCACAGTAATTAATATACGACCTGCAGGAATAACCCTTGACCGAATACCCTTATTTGTATGAGCAGTGGTTATTACAGCTGTATTACTTTTACTTTCACTC	Arthropoda	Insecta	Coleoptera	Anthicidae	Anthicidae sp.	Anthicidae sp.	41171	0	0	0	0	0	0	0	0	0	0	0	0	0	0	0	0	0	0	0	0	0	0	0	0	0	0	0	0	0	0	0	0	0	0	0	0	0	0	0	0	0
ASV070	TCTTTCTTCATCTATTGCTCATAGAGGAGCTTCTGTAGATTTAGCTATTTTTAGACTTCATTTAGCTGGAATTTCTTCAATTTTAGGAGCAGTTAATTTCATTACAACAATTATTAATATACGATCAGTTGGAATAACTTTTGATCGTATACCTTTATTTGTTTGATCTGTAGGGATTACTGCTTTATTACTTCTTCTTTCTTTA	Arthropoda	Insecta	Coleoptera	Carabidae	Carabidae sp.	Carabidae sp.	9153	0	0	0	0	0	0	0	0	0	0	0	0	0	0	0	0	0	0	0	0	0	0	0	0	0	0	0	0	0	0	0	0	0	0	0	0	0	0	0	0	0
ASV071	TCTTTCTTCTTCTATTGCTCATAGAGGAGCTTCTGTAGATTTAGCTATTTTTAGACTTCATTTAGCTGGAATTTCTTCAATTTTAGGAGCAGTTAATTTCATTACAACAATTATTAATATACGATCAGTTGGAATAACTTTTGATCGTATACCTTTATTTGTTTGATCTGTAGGAATTACTGCTTTATTACTTCTTCTTTCTTTA	Arthropoda	Insecta	Coleoptera	Carabidae	Tachys	Tachys sp.	760	0	0	0	0	0	0	0	0	0	0	0	0	0	0	0	0	0	0	0	0	0	0	0	0	0	0	0	0	0	0	0	0	0	0	0	0	0	0	0	0	0
ASV073	TCTTTCTGCCAATGTAGCCCACAGAGGATCATCTGTTGATTTAGCAATTTTTAGTCTTCACTTAGCAGGAATTTCCTCAATTCTAGGAGCAGTTAATTTTATCTCTACTGTTATTAATATACGACCAGAAGGAATAACTCCTGAACGAATACCATTATTTGTATGAGCTGTAGTTATTACTGCAATTCTCCTTTTATTATCATTA	Arthropoda	Insecta	Coleoptera	Cerambycidae	Phoracantha	Phoracantha semipunctata	300	0	0	0	0	0	0	0	0	0	0	0	0	0	0	0	0	0	0	0	0	0	0	0	0	0	0	0	0	0	0	0	0	0	0	0	0	0	0	0	0	0
ASV075	TTTATCATCTAATATTGCTCATGGAGGTTCATCTGTTGATTTAGCTATTTTTAGGTTACATCTAGCCGGTATTTCATCAATTTTAGGTGCAATTAATTTCATTACTACTGTAATTAATATACGACCCGAAGGAATAACTTTAGACCGAATACCTTTATTTGTATGAGCAGTTGTAATTACTGCAATTTTATTACTTTTATCTTTA	Arthropoda	Insecta	Coleoptera	Chrysomelidae	Chrysomelidae sp.	Chrysomelidae sp. 01	11387	0	0	0	0	0	0	0	0	0	0	0	0	0	0	0	0	0	0	0	0	0	0	0	0	0	0	0	0	0	0	0	0	0	0	0	0	0	0	0	0	0
ASV076	TCTATCTTCAAATATTGCTCATTCTGGGTCTAGAGTTGACTTAGCTATTTTTAGATTACACTTAGCTGGGGTTTCTTCTATTTTAGGGGCCATTAATTTTATTACAACAGTTATTAATATGCGACCAAGAGGAATAACTTTAGAACGAACTCCTTTATTTGTATGATCAGTTGTTATTACTGCATTTTTACTACTACTTTCACTT	Arthropoda	Insecta	Coleoptera	Chrysomelidae	Chrysomelidae sp.	Chrysomelidae sp. 02	2458	0	0	0	0	0	0	0	0	0	0	0	0	0	0	0	0	0	0	0	0	0	0	0	0	0	0	0	0	0	0	0	0	0	0	0	0	0	0	0	0	0
ASV077	TTTATCATCTAATATTGCTCATGGGGGATCTTCAGTTGATTTAGCTATTTTTAGTTTACATTTAGCAGGAATTTCGTCAATTTTAGGTGCAGTAAATTTTATTACTACAGTAATTAATATACGACCAGAAGGAATAACCTTAGATCGAATACCTTTATTTGTTTGAGCAGTAGCAATTACTGCTTTATTACTTCTTCTTTCTTTA	Arthropoda	Insecta	Coleoptera	Cleridae	Enoclerus	Enoclerus sp.	9503	0	0	0	0	0	0	0	0	0	0	0	0	0	0	0	0	0	0	0	0	0	0	0	0	0	0	0	0	0	0	0	0	0	0	919	0	0	0	0	0	0
ASV078	TCTTTCTGCAGCTATTGCTCATAGCGGGGCTTCAGTTGATTTAGCTATTTTCTCTTTACATTTAGCAGGTGTTTCTTCAATTTTAGGTTCAGTAAATTTTATTACTACAGTTATTAATATACGAGCAAACGGAATTACTTTAGATCGAATACCTTTATTTGTTTGATCTGTTGTTATTACAACTGTTCTATTATTACTTTCTCTA	Arthropoda	Insecta	Coleoptera	Cleridae	Opilo	Opilo whitei	200330	4	1	2	0	0	0	2	3	2	0	0	0	0	115	0	3	2	0	0	2	3	0	0	0	0	0	2	173	0	24	28	0	0	28	0	0	1	0	0	0	0
ASV079	TTTATCTTCAAATTTAGCACATAATGGACCTTCCGTGGACTTAGTAATTTTTAGATTACATTTAGCAGGAATTTCCTCTATTTTAGGGGCTGTAAATTTTATTTCAACAATTATAAATATACGGCCATTTGGAATAAATTTAGATAAAACCCCTCTATTTGTTTGATCAGTTTTAATTACAGCAATTTTATTACTTTTATCATTA	Arthropoda	Insecta	Coleoptera	Coccinellidae	Coccinella	Coccinella transversalis	213589	0	0	0	0	0	0	0	0	0	0	0	0	0	0	0	0	0	0	0	0	0	0	0	0	0	0	0	0	0	0	0	0	0	0	0	0	0	0	0	0	0
ASV080	CTTATCTTCTAACTTAGCTCATGGAGGATCTTCAGTAGATATAGCAATTTTTAGATTACATTTAGCTGGAATTTCTTCTATTTTAGGAGCTTTAAATTTTATTACTACAATTATTAATATACGACCTAAAGGAATAACATTTGAAAAAATACCTTTATTTGTATGATCAGTTTTATTAACAGCAATTCTTTTACTTCTTTCTTTA	Arthropoda	Insecta	Coleoptera	Coccinellidae	Coccinellidae sp.	Coccinellidae sp.	2065	0	0	0	0	0	0	0	0	0	0	0	0	0	0	0	0	0	0	0	0	0	0	0	0	0	0	0	0	0	19	631	0	0	0	1415	0	0	0	0	0	0
ASV081	CCTTTCTTCTAACATTGCCCATGGAGGTTCATCGGTTGACATAGCAATTTTTAGCCTTCATTTAGCAGGTATTTCTTCAATTTTAGGAGCAGTTAATTTTATTACAACCATTATTAATATGCGACCTTACGGAATAAGATTCGAAAAAATACCTTTATTTGTTTGATCAGTTTTATTAACTGCAATTTTACTATTGCTTTCATTA	Arthropoda	Insecta	Coleoptera	Coccinellidae	Diomus	Diomus notescens	6493	0	0	0	0	0	0	0	0	0	0	0	0	0	0	0	0	0	0	0	0	0	0	0	0	0	0	0	0	0	0	0	0	0	0	0	0	0	0	0	0	0
ASV082	TCTTTCAGCTAATATTGCACATAGAGGTCCTTCTGTAGATTTAGCTATTTTTAGTCTCCATTTAGCAGGAATTTCATCAATTTTAGGAGCTATTAATTTTATTACTACAATAATTAATATACGACCTTTAGGAATACATTTAGACAAAATACCTTTATTTGCATGATCTGTTTTAATCACAGCAATCTTACTTTTACTGTCTCTC	Arthropoda	Insecta	Coleoptera	Coccinellidae	Epilachna	Epilachna sumbana	5963	0	0	0	0	0	0	0	0	0	0	0	0	0	0	0	0	0	0	0	0	0	0	0	0	0	0	0	0	0	0	0	0	0	0	0	0	0	0	0	0	0
ASV085	TCTTTCAGCTAATATTGCCCATAGAGGTCCTTCTGTTGATTTAGCAATTTTTAGGCTTCATCTAGCTGGTGTATCATCAATTTTAGGAGCAATTAATTTTATTACAACTATAATTAATATACGGCCTATCGGAATACAAATAGACAAACTTCCTTTATTTGCTTGATCAGTCTTAATTACTGCCATTTTACTTCTTTTATCTCTC	Arthropoda	Insecta	Coleoptera	Coccinellidae	Henosepilachna	Henosepilachna vigintioctopunctata	26790	0	0	0	0	0	0	0	0	0	0	0	0	0	0	0	0	0	0	0	0	0	0	0	0	0	0	0	0	0	0	0	0	0	0	0	0	0	0	0	0	0
ASV086	TCTTTCATCTAACTTAGCTCATAATGGACCCTCTGTTGATTTAGTGATTTTTAGTTTACATTTAGCAGGAATTTCCTCTATTTTAGGAGCAGTAAATTTTATTTCTACTATTATAAATATACGACCATATGGAATAAGTTTAGATAAAACCCCTCTCTTTGTGTGATCTGTTTTAATTACAGCAATTTTATTACTCTTATCACTT	Arthropoda	Insecta	Coleoptera	Coccinellidae	Hippodamia	Hippodamia variegata	443969	0	0	0	0	0	21075	0	3	0	0	0	0	4	46	159710	76948	0	0	0	0	0	24	71	0	0	0	0	101	0	0	18	0	209	30	10	3	0	3	0	0	0
ASV087	CCTATCGGCTAATATTGCTCACAGAGGATCATCAGTAGATTTAGCAATTTTTAGTTTACACCTAGCAGGTATTTCATCAATTTTAGGAGCTGTAAATTTTATTACAACAGTAATTAATATACGACCAGCAGGAATAACTTTAGATCGAATACCACTATTTGTATGAGCAGTAGTAATTACTGCTGTTTTATTACTCCTATCTCTT	Arthropoda	Insecta	Coleoptera	Coleoptera sp.	Coleoptera sp.	Coleoptera sp. 01	5174	0	0	0	0	0	0	0	0	0	0	0	0	0	0	0	0	0	0	0	0	0	0	0	0	0	0	0	0	0	0	0	0	0	0	18	0	0	0	0	0	0
ASV088	TCTTTCAGCTAATATTGCACACAGAGGATCTTCTGTAGATTTAGCAATTTTTAGTCTTCACTTAGCAGGAATTTCATCAATTCTAGGTGCAGTAAATTTTATTACCACAGTAATCAATATACGACCAGCAGGAATAACATTTGATCGTATACCCTTATTTGTATGAGCTGTAGTTATTACAGCAGTTCTTCTTCTCTTATCTCTT	Arthropoda	Insecta	Coleoptera	Coleoptera sp.	Coleoptera sp.	Coleoptera sp. 02	126	0	0	0	0	0	0	0	0	0	0	0	0	0	0	0	0	0	0	0	0	0	0	0	0	0	0	0	0	0	0	0	0	0	0	0	0	0	0	0	0	0
ASV089	TTTATCAGCTAATATTGCTCATGAAGGATCTTCTGTTGATTTGGCTATTTTTAGCCTTCATATAGCAGGAGTTTCATCAATCTTAGGTGCTATTAATTTTATTTCTACTGTAATTAATATACGACCTATAGGAATATCTCCTGATCGAATATCTTTATTTATTTGAGCAGTAAAAATTACAGCTATTCTTTTATTACTCTCTCTT	Arthropoda	Insecta	Coleoptera	Coleoptera sp.	Coleoptera sp.	Coleoptera sp. 03	94	0	0	0	0	0	0	0	0	0	0	0	0	0	0	0	0	0	0	0	0	0	0	0	0	0	0	0	0	0	0	0	0	0	0	0	0	0	0	0	0	0
ASV090	TTTATCAAGAAATATTGCTCATAGAGGTTCAGCTGTTGATTTGTCAATTTTCAGTTTACATCTTGCAGGAATTTCTTCTATTCTAGGAGCAGTAAATTTTATTACTACAATTATTAATATACGACCAGCAGGAATAACTTTAGAAAAGACCCCCTTATTTGTTTGAGCTGTCTTAATTACAGCTATCCTATTACTTCTTTCATTA	Arthropoda	Insecta	Coleoptera	Coleoptera sp.	Coleoptera sp.	Coleoptera sp. 04	5734	0	0	0	0	0	0	0	0	0	0	0	0	0	0	0	0	0	0	0	0	0	0	0	0	0	0	0	0	0	0	0	0	0	0	0	0	0	0	0	0	0
ASV091	TCTTTCTTCTAATATTGCTCATTCAGGGAGATCTGTTGATTTAGCAATTTTTAGACTTCATTTAGCGGGGGTTTCTTCAATTTTAGGGGCTATTAACTTCATTACTACAGTAATTAATATGCGACCTAGAGGAATATCTTTAGAACGAATACCTTTATTTGTTTGATCAGTAGTTATTACGGCTTTTTTATTGTTATTATCCCTT	Arthropoda	Insecta	Coleoptera	Coleoptera sp.	Coleoptera sp.	Coleoptera sp. 05	649	0	0	0	0	0	0	0	0	0	0	0	0	0	0	0	0	0	0	0	0	0	0	0	0	0	0	0	0	0	0	0	0	0	0	0	0	0	0	0	0	0
ASV092	TCTTTCATCAAATATTGCTCATGGAGGAGCTTCAGTAGATCTTGCAATCTTCAGTCTTCATTTAGCAGGTATTTCATCTATCTTGGGAGCAGTAAATTTTATTACTACAGTAATCAATATACGACCTCAAGGAATAACATTTGATCGAATACCTCTCTTCGTATGAGCAGTAGTAATCACTGCAGTATTACTCCTATTATCACTC	Arthropoda	Insecta	Coleoptera	Coleoptera sp.	Coleoptera sp.	Coleoptera sp. 06	62425	0	0	0	0	0	0	0	0	0	0	0	0	0	0	0	0	0	0	0	0	0	0	0	0	0	0	0	0	0	0	0	0	0	0	0	0	0	0	0	0	0
ASV094	TCTCTCTTCCAATATCGCTCATGGAGGAGCATCAGTAGATCTAGCAATTTTCAGTCTACACCTAGCAGGAATTTCATCAATTCTAGGAGCTGTAAATTTCATTACAACAGTAATTAATATGCGACCCCAGGGAATATCATTTGATCGAATACCGCTATTTGTATGAGCAGTAGTAATCACTGCAGTTCTATTATTATTGTCACTA	Arthropoda	Insecta	Coleoptera	Coleoptera sp.	Coleoptera sp.	Coleoptera sp. 08	191646	0	0	0	0	0	0	0	0	0	0	0	0	0	0	0	0	0	0	0	0	0	0	0	0	0	0	0	0	0	0	0	4372	0	0	0	0	0	0	0	0	0
ASV095	ACTTTCATCAGGAATTGCCCATTCAGGAGCTTCAGTCGATCTTACAATTTTTAGTTTACACTTAGCAGGAATTTCTTCTATTTTAGGAGCTGTAAATTTTATTACAACAATTATTAATATACGATCTCCAGGAATAACATTTGAACGAATACCTTTATTTGTTTGATCAGTAGGCATTACTGCATTATTATTATTATTATCTCTA	Arthropoda	Insecta	Coleoptera	Coleoptera sp.	Coleoptera sp.	Coleoptera sp. 09	46386	0	0	0	0	0	0	0	0	0	0	0	0	0	0	0	0	0	0	0	0	0	0	0	0	0	0	0	0	0	0	0	0	0	0	0	0	0	0	0	0	0
ASV096	TTTATCAGCAAATATTGCCCACAGAGGATCATCTGTTGATTTAGCCATTTTTAGTCTCCATTTAGCAGGAATTTCTTCTATTCTTGGAGCAGTAAATTTTATCTCAACAGTCATTAATATACGATCAACAGGAATTACCCTTGATCGCATACCTTTATTTGTTTGAGCAGTTGTTATTACTGCTCTTCTTCTTCTTCTATCCTTA	Arthropoda	Insecta	Coleoptera	Coleoptera sp.	Coleoptera sp.	Coleoptera sp. 10	75730	0	0	0	0	0	0	0	0	0	0	0	0	0	0	0	0	0	0	0	0	0	0	0	0	0	0	0	0	0	0	0	0	0	0	0	0	0	0	0	0	0
ASV097	CCTATCTTCGAATATTGCTCATGGAGGAGCCTCTGTAGATTTAGCAATTTTTAGATTACATCTAGCTGGAATTTCTTCTATCTTAGGTGCAGTAAATTTTATTTCAACTGTAATTAATATACGATCAACAGGTATCACCTTTGACCGAATACCTTTATTTGTATGATCAGTTGCAATTACTGCCCTATTACTTCTTCTTTCTTTA	Arthropoda	Insecta	Coleoptera	Coleoptera sp.	Coleoptera sp.	Coleoptera sp. 11	37247	99	161	0	0	0	0	0	0	0	0	0	0	0	0	0	0	18674	0	0	0	0	0	0	0	0	0	0	0	0	0	0	0	0	0	0	0	0	0	0	0	11133
ASV098	CCTGTCATCTAATATTGCCCATAGTGGATCCTCTGTAGATTTAGCTATTTTTAGTCTTCATTTAGCAGGAATCTCTTCAATTCTAGGAGCTGTAAATTTTATCTCTACAATTATTAATATGCGATCAATTGGTATATCATTTGACCGAATACCCCTATTTGTTTGATCAGTTAATATTACTGCTATTTTATTATTATTATCTTTA	Arthropoda	Insecta	Coleoptera	Coleoptera sp.	Coleoptera sp.	Coleoptera sp. 12	45463	0	0	0	0	0	0	0	0	0	0	0	0	0	0	0	0	0	0	0	0	0	0	0	0	0	0	0	0	0	0	0	0	0	0	0	0	0	0	0	0	0
ASV099	TTTAGCATCTAATATTGCTCATGGTGGGGCTTCAGTTGATTTAGCTATTTTTAGGCTGCATCTAGCTGGTATTTCGTCAATTTTAGGAGCTGTAAATTTCATTACAACCATTATTAATATACGAGCACCTCAAATAAATTTTGATCAAATACCTTTGTTTGTTTGAGCTGTAGGAATTACAGCCCTATTATTACTGTTATCATTA	Arthropoda	Insecta	Coleoptera	Coleoptera sp.	Coleoptera sp.	Coleoptera sp. 13	11991	0	0	0	0	0	0	0	0	0	0	0	0	0	0	0	0	0	0	0	0	0	0	0	0	0	0	0	0	0	0	0	0	0	0	0	0	0	0	0	0	0
ASV100	TTATCTTCCAATATAGCCCACGGAGGATCTTCAGTAGATTTGGCAATTTTTAGCCTACATCTAGCTGGAATTTCTTCAATTTTAGGAGCAATTAATTTTATTACAACAATTATTAATATACGACCTAAAGGTATATCCTTCGATCAAATACCCTTATTTGTCTGAGCAGTTTTAATTACAGCTGTTCTCTTACTTTTATCATTA	Arthropoda	Insecta	Coleoptera	Coleoptera sp.	Coleoptera sp.	Coleoptera sp. 14	6460	0	0	0	0	0	0	0	0	0	0	0	0	0	0	0	0	0	0	0	0	0	0	0	0	0	0	0	0	0	0	0	0	0	0	0	0	0	0	0	0	0
ASV101	TCTATCTGCAAACATTGCCCATAGAGGCTCATCTGTTGACTTGGCAATTTTTAGTCTTCACCTGGCAGGAATTTCATCAATTCTAGGAGCAGTAAATTTTATTACAACAGTAATCAATATACGACCAGCAGGCATAACATTAGACCGAATACCATTATTTGTATGAGCAGTAGTAATCACAGCCATCTTATTACTTTTATCACTC	Arthropoda	Insecta	Coleoptera	Coleoptera sp.	Coleoptera sp.	Coleoptera sp. 15	3650	0	0	0	0	0	0	0	0	0	0	0	0	0	0	0	0	0	0	0	0	0	0	0	0	0	0	0	0	0	0	0	0	0	0	0	0	0	0	0	0	0
ASV102	ATTATCATCAAACATCGCTCACAGAGGGGCATCAGTTGATTTAGCAATTTTCAGATTACATCTAGCAGGAATTTCATCAATTTTAGGAGCAGTTAATTTCATTACAACAGTAATTAACATACGTCCTCAAGGAATAACATTAGACCGAATGCCTTTATTTGTATGAGCTGTTGTTATTACAGCAGTTCTTCTACTTCTATCCTTA	Arthropoda	Insecta	Coleoptera	Coleoptera sp.	Coleoptera sp.	Coleoptera sp. 16	1845	0	0	0	0	0	0	0	0	0	0	0	0	0	0	0	0	0	0	0	0	0	0	0	0	0	0	0	0	0	0	0	0	836	0	0	0	0	0	0	0	0
ASV103	CCTATCATCTAATATTGCCCATAGAGGAGCTTCAGTAGATTTAGCTATTTTTAGCCTTCATTTAGCTGGAATTTCCTCTATTCTAGGTGCAGTAAATTTTATTACTACAGTTATTAATATGCGAGCTTCAGGTATAACCTTTGATCGAATACCTTTATTTGTTTGATCCGTAGTTTTAACAGCTTTATTATTACTCCTCTCTTTG	Arthropoda	Insecta	Coleoptera	Coleoptera sp.	Coleoptera sp.	Coleoptera sp. 17	1122	0	0	0	0	0	0	0	0	0	0	0	0	0	0	0	0	0	0	0	0	0	0	0	0	0	0	0	0	0	0	0	0	0	0	0	0	0	0	0	0	0
ASV104	TATCATCTAACATTGCCCACAGAGGAGCTTCAGTAGATTTAGCTATTTTCAGCCTTCATTTAGCAGGAATTTCTTCAATCCTAGGAGCAGTAAATTTTATTACCACAGTTATTAACATACGAGCTTCAGGCATAACCTTTGATCGAATACCTTTATTTGTTTGATCCGTAGTTTTAACAGCTTTATTATTACTCCTATCCTTA	Arthropoda	Insecta	Coleoptera	Coleoptera sp.	Coleoptera sp.	Coleoptera sp. JF888661.1	4516	0	0	0	0	0	0	0	0	0	0	0	0	0	0	0	0	0	0	0	0	0	0	0	0	0	0	0	0	0	0	0	0	0	0	0	0	0	0	0	0	0
ASV105	TTTATCATCTAACATTGCCCATAGAGGAGCTTCAGTAGATTTAGCTATTTTTAGACTTCATCTTGCAGGAATTTCCTCCATCTTAGGTGCAGTAAATTTTATTACTACAGTTATTAATATACGAGCATCAGGTATAACATTTGACCGAATACCCTTATTTGTATGATCTGTAGTTTTAACAGCTTTATTACTTCTTCTATCATTA	Arthropoda	Insecta	Coleoptera	Coleoptera sp.	Coleoptera sp.	Coleoptera sp. nr JF888711.1	5212	0	0	0	0	0	0	0	0	0	0	0	0	0	0	0	0	0	0	0	0	0	0	0	0	0	0	0	0	0	0	0	0	0	0	0	0	0	0	0	0	0
ASV106	TTTATCTTCTAATATTGCCCATGGAGGTGCTTCAGTTGATTTAGCTATTTTTAGTTTACATTTAGCTGGTATTTCATCAATTTTAGGTGCTATTAATTTTATTTCTACTATTTTAAATATACGTCCTGCTGGAATAAATTTTGAACAAATACCTCTTTTTGTTTGATCAGTTTTATTTACAGCTATTTTATTATTATTATCTTTA	Arthropoda	Insecta	Coleoptera	Corylophidae	Sericoderus	Sericoderus lateralis	9302	0	0	0	0	0	0	0	0	0	0	0	0	0	0	0	0	45	0	0	0	0	47	27	0	0	0	0	0	3	0	0	0	0	0	0	0	0	0	0	0	0
ASV107	TTTATCTTCCAATATTGCTCATGGAGGTGCTTCAGTTGATTTAGCTATTTTTAGCTTACATTTAGCTGGTATTTCATCAATTTTAGGTGCTATTAATTTTATTTCTACTATTTTAAATATACGTCCTACTGGGATAAATTTTGAACCAATACCTCTTTTTGTTTGATCAGTTTTATTTACAGCTATTTTCTTATTATTATCTTTA	Arthropoda	Insecta	Coleoptera	Corylophidae	Sericoderus	Sericoderus nr lateralis	235	0	0	0	0	0	0	0	0	0	0	0	0	0	0	0	0	0	0	0	0	0	0	0	0	0	0	0	0	0	0	0	0	0	0	0	0	0	0	0	0	0
ASV110	ACTTTCAAGTAATATTGCTCATGGAGGAGCATCTGTTGATTTAGCTATTTTTAGTCTCCACTTGGCAGGTATTTCCTCAATCCTAGGCGCAGTAAACTTTATTACCACCGCCATTAACATACGAACAACAGGAATAACACCAGAACGTATACCGTTATTTGTTTGATCAGTAGCAATTACTGCCCTCCTCCTTCTTTTATCTTTA	Arthropoda	Insecta	Coleoptera	Dermestidae	Anthrenus	Anthrenus museorum	93	0	0	0	0	0	0	0	0	0	0	0	0	28	64	0	0	0	0	0	0	0	0	0	0	0	0	0	0	0	0	0	0	0	0	0	0	0	0	0	0	0
ASV112	TTTATCAGCTAATATTGCTCATAGAGGATCATCTGTTGATTTAGCTATTTTCAGATTACATTTAGCAGGAATTTCTTCAATTTTAGGAGCAGTAAATTTTATTTCTACAGTTATTAATATACGATCAACAGGAATTACTTTAGATCGTATACCTTTATTTGTTTGAGCTGTTGTTATTACTGCCCTTCTCCTATTATTATCATTA	Arthropoda	Insecta	Coleoptera	Elateridae	Conoderus	Conoderus exsul	4886	0	0	0	0	0	0	0	0	0	0	0	0	0	0	0	0	0	0	0	0	0	0	0	0	0	0	0	0	0	0	0	0	0	0	0	0	0	0	0	0	0
ASV114	ACTATCATCTAATATTGCCCATGGAGGATCTTCAGTAGATTTAGCTATTTTTAGTTTACATTTAGCAGGAATTTCCTCAATTCTTGGTGCAGTAAATTTTATTTCTACAGTAATTAATATACGAGCATCAGGAATTACATTTGATCGAATACCTCTTTTTGTTTGATCTGTAGCTATTACTGCTCTTCTTTTATTATTATCCTTA	Arthropoda	Insecta	Coleoptera	Elateridae	Elateridae sp.	Elateridae sp. 02	4254	0	0	0	0	0	0	0	0	0	0	0	0	0	0	0	0	0	0	0	0	0	0	0	0	0	0	0	0	0	0	0	0	0	0	0	0	0	0	0	0	0
ASV115	TCTTTCTGCTAATATTGCTCATAGAGGTTCATCAGTTGATTTAGCAATTTTTAGTCTTCATCTTGCTGGTATTTCCTCAATTTTAGGAGCTGTAAATTTTATCTCTACTGTTATCAATATACGATCTACAGGAATCACCTTTGATCGAATACCTTTATTTGTTTGAGCTGTAGTAATTACTGCCCTTCTTCTTCTTCTATCTTTA	Arthropoda	Insecta	Coleoptera	Elateridae	Heteroderes	Heteroderes falli	988	0	0	0	0	0	0	0	0	0	0	0	0	0	0	0	0	0	0	0	0	0	0	0	0	0	0	0	0	0	0	0	0	0	0	0	0	0	0	0	0	0
ASV117	TTTATCAAGAAATATTGCTCATGGAGGATCTTCAGTTGATTTAGCAATTTTTAGATTACATCTTGCAGGAATTTCTTCAATTCTTGGTGCTGTAAATTTTATTACTACAGTTATTAATATACGACCTGCTGGGATATCTTTAGATCAAATACCTTTATTTGTATGATCAGTTGTAATTACAGCTATTTTATTATTATTATCTTTA	Arthropoda	Insecta	Coleoptera	Latridiidae	Corticaria	Corticaria elongata	3926	0	0	0	0	0	0	0	0	0	0	0	0	0	0	0	0	0	0	0	0	0	0	0	0	0	0	0	0	0	0	0	0	0	0	0	0	0	0	0	0	0
ASV118	ATTATCTAGAAATATTGCTCATGGGGGATCTTCAGTTGATTTAGCTATTTTTAGATTACATTTAGCTGGAATTTCTTCAATTTTAGGAGCTGTAAATTTTATTACTACAGTAATTAATATACGACCAGCTGGTATATCATTAGATCAAATACCTTTATTTGTTTGATCAGTTGTTATTACAGCTATTTTATTATTATTATCATTA	Arthropoda	Insecta	Coleoptera	Latridiidae	Latridiidae sp.	Latridiidae sp.	11034	0	0	0	0	0	0	0	0	52	0	0	0	0	0	0	0	0	0	0	0	0	0	0	0	0	0	0	0	0	0	0	0	0	0	0	0	0	0	35	35	0
ASV119	ACTCTCATCCAATATCGCCCACGGAGGTTCATCTGTAGATTTGGCCATTTTTAGACTTCATTTAGCTGGAATTTCATCCATTTTAGGAGCAGTGAATTTTATTACTACTGTAATTAATATGCGACCCACAGGAATAACATTTGATCGAATACCCCTATTCGTTTGAGCTGTTGTTATTACCGCAATTCTACTGCTTCTTTCACTA	Arthropoda	Insecta	Coleoptera	Nitidulidae	Carpophilus	Carpophilus davidsoni	109	0	0	0	0	0	0	0	0	0	0	0	0	0	0	0	0	0	0	0	0	0	0	0	0	0	0	0	0	0	0	0	0	0	0	0	0	0	0	0	0	0
ASV120	ACTATCATCTAATATTGCCCATGGAGGTTCTTCAGTTGATTTGGCTATTTTTAGTCTTCATTTAGCAGGAATTTCTTCTATTTTAGGAGCTGTAAATTTTATTACTACTGTAATTAACATGCGACCTACTGGGATATCATTTGACCGTATACCTTTATTTGTATGGGCCGTTGTTATTACAGCTATCCTCCTCCTTTTATCATTA	Arthropoda	Insecta	Coleoptera	Nitidulidae	Carpophilus	Carpophilus hemipterus	130276	0	0	0	0	0	0	0	0	0	0	0	0	0	0	0	0	0	0	0	0	0	60271	69629	0	0	0	0	0	0	0	0	0	0	0	0	0	0	0	0	0	0
ASV121	TCTGTCATCTAATATTGCCCATGGAGGATCGTCAGTAGATTTGGCAATTTTCAGGCTACACCTAGCAGGTATTTCATCTATTTTAGGAGCTGTAAATTTTATTACTACAGTAATTAATATACGACCAACTGGAATAACATTTGATCGTATACCATTATTTGTATTGGCTGTTGTTATTACGGCAGTATTATTATTATTGTCTCTT	Arthropoda	Insecta	Coleoptera	Nitidulidae	Carpophilus	Carpophilus sp.	121	0	0	0	0	0	0	0	0	0	0	0	0	0	0	0	0	0	0	0	0	0	0	0	0	0	0	0	0	0	0	0	0	0	0	0	0	0	0	0	0	0
ASV122	ACTGTCATCCAATATCGCTCACGGAGGATCTTCTGTAGATTTGGCTATTTTTAGATTGCATTTAGCAGGAGTATCTTCAATTTTAGGAGCTGTAAATTTCATTACAACTGTAATTAATATGCGACCCACCGGCATAACATTAGACCGTATGCCTTTATTTGTATGAGCAGTTGTAATTACTGCTATTTTATTACTTCTTTCTTTA	Arthropoda	Insecta	Coleoptera	Nitidulidae	Epuraea	Epuraea signata	34520	0	0	0	0	0	0	0	0	0	0	0	0	0	0	0	0	0	0	0	0	0	0	0	0	0	0	0	0	0	0	0	0	0	0	0	0	0	0	0	0	0
ASV123	TCTGTCATCCAATATTGCCCATGGAGGATCATCAGTAGATTTAGCTATTTTTAGACTACATCTAGCAGGTATCTCATCTATTTTAGGAGCTGTAAATTTTATCACTACAGTAATTAATATACGACCAACTGGAATAACATTTGATCGTATACCATTATTTGTATGGGCTGTTGTTATTACAGCAGTATTATTACTTCTATCTCTC	Arthropoda	Insecta	Coleoptera	Nitidulidae	Urophorus	Urophorus humeralis	123302	0	0	0	0	0	0	0	0	0	0	0	0	0	0	0	0	0	0	0	0	0	0	0	0	0	0	0	0	0	0	0	0	0	0	0	0	0	0	0	0	0
ASV124	CTTATCTTCTAATATTGCCCATGGAGGGGCCTCAGTTGATTTAGCTATTTTCAGCCTTCATTTAGCGGGTATTTCTTCCATTTTAGGAGCCGTAAATTTTATTACAACAGTAATTAATATACGATCCCCAGGCATAACCTTCGACCGTATACCCCTATTTGTATGATCAGTAGCTATTACTGCCCTATTACTTTTACTATCACTC	Arthropoda	Insecta	Coleoptera	Scarabaeidae	Aphodius	Labarrus cincticulus	559	0	0	0	0	0	0	0	0	0	0	0	0	0	0	0	0	0	0	0	0	0	0	0	0	0	0	0	0	0	0	0	0	0	0	0	0	0	0	0	0	0
ASV126	TCTCTCAGCAAATATTGCCCATAGAGGAGCCTCAGTAGACTTGGCTATTTTTAGATTACACTTAGCTGGAATCTCATCAATTTTAGGTGCAGTTAATTTCATTACCACAGTTATTAATATACGAGCAACTGGAATATCCTTTGACCGAATACCTTTATTTGTATGATCAGTAGTACTAACAGCCCTATTACTACTACTATCACTA	Arthropoda	Insecta	Coleoptera	Scarabaeidae	Sericesthis	Sericesthis geminata	5848	0	0	0	0	0	0	0	0	0	0	0	0	0	0	0	0	0	0	0	0	0	0	0	0	0	0	0	0	3	4	0	0	0	0	0	0	0	0	0	0	0
ASV127	GCTATCAGCCAATATTGCCCATAGCGGAGCTTCTGTAGACTTAGCAATCTTCAGATTACACTTAGCAGGAATTTCCTCAATTCTAGGAGCAGTAAATTTTATTACCACAGTTATCAACATACGAACAACTGGAATAACCTTTGATCGTATACCTCTGTTTGTTTGATCAGTAGTATTAACAGCCCTTTTATTGCTACTATCTTTA	Arthropoda	Insecta	Coleoptera	Scarabaeidae	Sericesthis	Sericesthis micans	39	0	0	0	0	0	0	0	0	0	0	0	0	0	0	0	0	0	0	0	0	0	0	0	0	0	0	0	0	0	0	0	0	0	0	0	0	0	0	0	0	0
ASV129	TTTATCTTCCAATATTGCCCATGGAGGTTCATCTGTTGATTTAGCTATTTTTAGTCTTCATTTAGCAGGAATTTCATCAATTTTAGGAGCAGTAAATTTTATTTCTACAGTTATTAATATACGTTCAATAGGAATAACATTTGACAAAATACCTTTATTTGTATGATCAGTTGCTATTACTGCTTTATTACTTTTATTATCATTA	Arthropoda	Insecta	Coleoptera	Staphylinidae	Aleochara	Aleochara bipustulata/verna	255	0	0	0	0	0	0	0	0	0	0	0	0	0	0	0	0	0	0	0	0	0	0	0	0	0	0	0	0	0	0	0	0	0	0	0	0	0	0	0	0	0
ASV130	ACTGTCTTCTAATATTGCCCATAGAGGATCTTCTGTAGATTTAGCAATTTTTAGGTTACACTTAGCTGGAGTCTCTTCTATTCTTGGGGCAGTAAATTTTATCTCAACAATTATCAATATACGATCAATTGGGATAACATTTGATCGAATACCCCTATTTGTATGATCAGTTAATATTACTGCTATTTTACTTCTACTTTCCCTT	Arthropoda	Insecta	Coleoptera	Staphylinidae	Carpelimus	Carpelimus corticinus	87	0	0	0	0	0	0	0	0	0	0	0	0	0	0	0	0	0	0	0	0	0	0	0	0	0	0	0	0	0	0	0	0	0	0	0	0	0	0	0	0	0
ASV132	CCTGTCATCTAATATTGCCCATAGTGGATCCTCTGTAGATTTAGCTATTTTTAGTCTTCATTTAGCGGGAATCTCTTCAATTCTAGGAGCTGTAAATTTTATTTCTACAATTATTAATATGCGATCAATTGGTATATCATTTGATCGAATACCCCTATTTGTTTGATCAGTTAATATTACTGCTATTTTATTATTATTATCTTTA	Arthropoda	Insecta	Coleoptera	Staphylinidae	Staphylinidae sp.	Staphylinidae sp. 01	5121	0	0	0	0	0	0	0	0	0	0	0	0	0	0	0	0	0	0	0	0	0	0	0	0	0	0	0	0	0	0	0	0	0	0	0	0	0	0	0	0	0
ASV133	ATTATCATCAAATATTGCTCATGGAGGATCATCAGTAGATTTAGCAATTTTTAGTCTACATTTAGCAGGAATTTCATCAATTCTAGGAGCTGTAAATTTTATCTCTACAGTAATTAATATACGTTCATTTGGAATTACATTTGATCGAATACCTTTATTTGTATGGTCTGTAGCAATTACAGCTTTATTATTACTTTTATCACTT	Arthropoda	Insecta	Coleoptera	Staphylinidae	Staphylinidae sp.	Staphylinidae sp. 02	3674	0	0	0	0	0	0	0	0	0	0	0	0	0	0	0	0	0	0	0	0	0	0	0	0	0	0	0	0	0	0	0	0	0	0	0	0	0	0	0	0	0
ASV134	CCTGTCATCTAATATTGCCCATAGTGGATCTTCTGTAGATTTAGCTATTTTTAGTCTTCATTTAGCTGGAATCTCTTCAATTTTAGGAGCTGTAAATTTTATTTCTACAATTATTAATATACGATCAATTGGTATATCCTTTGATCGAATACCACTATTTGTATGATCAGTTAATATTACTGCTATTTTATTATTATTATCTTTA	Arthropoda	Insecta	Coleoptera	Staphylinidae	Staphylinidae sp.	Staphylinidae sp. 03	2762	0	0	0	0	0	0	0	0	0	0	0	0	0	0	0	0	0	0	0	0	0	0	0	0	0	0	0	0	0	0	0	0	0	0	0	0	0	0	0	0	0
ASV135	TCTGTCATCTAATATTGCCCATAGTGGATCCTCTGTAGATTTAGCTATTTTTAGTCTTCATTTAGCAGGAATCTCTTCAATTTTAGGAGCTGTAAATTTTATTTCTACAATTATTAATATGCGATCAATTGGAATATCATTTGACCGAATACCTCTATTTGTTTGATCAGTTAATATTACTGCTATTTTATTATTATTATCTTTA	Arthropoda	Insecta	Coleoptera	Staphylinidae	Staphylinidae sp.	Staphylinidae sp. 04	1130	0	0	0	0	0	0	0	0	0	0	0	0	0	0	0	0	0	0	0	0	0	0	0	0	0	0	0	0	0	0	0	0	0	0	0	0	0	0	0	0	0
ASV136	TTTATCTTCTAATATTGCCCATAGAGGTGCTTCAGTTGATTTAACTATTTTTAGATTACATTTAGCAGGTATTTCTTCAATTTTAGGCGCTATTAATTTTATTACAACAATTTTAAATATACGACCTAAAATAATAACATTAGAACGTATACCTTTATTTGTTTGATCTGTTGGTATTACAGCTTTACTATTACTTTTATCTTTA	Arthropoda	Insecta	Coleoptera	Staphylinidae	Staphylinidae sp.	Staphylinidae sp. KX054781.1	1292	0	0	0	0	0	0	0	0	0	0	0	0	0	0	0	0	0	0	0	0	0	0	0	0	0	0	0	0	0	0	0	0	0	0	0	0	0	0	0	0	0
ASV137	ATTGTCATCTAATATTGCTCATAGTGGATCTTCTGTTGATTTAGCTATTTTTAGTCTTCATTTAGCAGGAATTTCTTCAATTTTAGGCGCAGTAAATTTTATTTCTACAATTATTAATATACGATCAATTGGAATATCATTTGACCGTATACCATTATTTGTTTGATCAGTCAATATTACAGCTATTTTATTGCTTCTATCCTTA	Arthropoda	Insecta	Coleoptera	Staphylinidae	Thinodromus	Thinodromus sp.	24661	0	0	0	0	0	0	0	0	0	0	0	0	0	0	0	0	0	0	0	0	0	0	0	0	0	0	0	0	0	0	0	0	0	0	0	0	0	0	0	0	0
ASV139	CCTGTCGGGGGCTATCGCTCACGCAGGGGCTTCGGTGGATTTGAGAATTTTTTCATTGCACTTGGCAGGGATTTCATCCATTTTAGGGGCAATTAATTTTATCACAACGGTGATTAACATGCGCCCTTCAGGTCTTAAGTTGGAACGAATACCATTATTTGTGTGATCTGTAGCCATTACTGCTCTTTTATTGTTACTTTCCTTA	Arthropoda	Insecta	Dermaptera	Forficulidae	Forficula	Forficula auricularia	1252	0	0	0	0	0	0	0	0	0	0	0	0	0	0	0	0	0	0	0	0	0	0	0	1188	0	0	0	0	0	0	0	0	0	0	0	0	0	0	0	0	0
ASV140	TCTCTCTTCTATTATTGCACATGGTGGCTCATCGGTTGATTTAGCAATTTTTTCTCTACATCTAGCAGGAATTTCATCAATTTTAGGAGCAGTAAATTTCATTACAACAATTATTAATATACGATCTACAGGAATTAGCTTTGATCGAATACCCTTATTTGTTTGATCAGTTTTTATTACTGCTATTTTATTACTTCTTTCTCTT	Arthropoda	Insecta	Diptera	Agromyzidae	Agromyzidae sp.	Agromyzidae sp. 01	40234	0	0	0	0	0	0	0	0	0	0	0	0	0	0	0	0	0	0	0	0	0	0	0	0	0	0	0	0	0	0	0	0	0	0	0	0	0	0	0	0	0
ASV141	TTTATCATCAGTAATTGCTCATGGGGGGAGCTCAGTAGACTTAGCTATTTTTTCTTTACATTTAGCCGGAGTATCCTCAATTTTAGGAGCAGTAAATTTTATTACGACTGTTATTAATATACGATCAGTAGGAATTACGTTTGACCGAATACCTTTATTTGTATGATCAGTATTAATTACAGCTGTATTATTACTATTATCTTTA	Arthropoda	Insecta	Diptera	Agromyzidae	Agromyzidae	Agromyzidae sp. HQ945417.1	7949	0	0	0	0	0	0	0	0	0	0	0	0	0	0	0	0	0	0	0	0	0	0	0	0	0	0	0	0	0	0	0	0	0	0	0	0	0	0	0	0	0
ASV142	ACTTTCATCAATTATTGCCCATGGAGGAGCATCAGTTGATTTAGCAATTTTTTCACTTCACTTAGCTGGAATTTCTTCAATTTTAGGAGCTGTAAATTTTATTACAACAATTATTAATATACGATCAACAGGAATTAATTTTGATCGAATACCTTTATTTGTATGATCAGTATTTATTACTGCTATTTTATTACTTTTATCTTTA	Arthropoda	Insecta	Diptera	Agromyzidae	Agromyzidae sp.	Agromyzidae sp. 02	15328	0	0	0	0	0	0	0	0	0	0	0	0	0	0	0	0	0	0	0	0	0	0	0	0	0	0	0	0	0	0	0	0	0	0	0	0	6093	4	0	0	0
ASV143	GCTATCTTCTATTATTGCTCATGGAGGAGCATCTGTAGATCTTGCTATTTTCTCTTTACATTTAGCAGGTATTTCTTCTATTCTAGGTGCTGTGAATTTTATTACTACAATTATTAATATACGTTCTACAGGAATTTCTTTCGATCGAATACCTTTATTTGTATGATCTGTATTAATTACAGCAGTTTTATTACTTTTATCTCTT	Arthropoda	Insecta	Diptera	Agromyzidae	Agromyzidae sp.	Agromyzidae sp. 03	8635	201	298	0	0	0	0	0	0	0	0	0	0	0	0	0	0	0	0	0	0	0	0	0	0	0	0	0	0	0	0	0	0	0	0	0	0	0	0	0	0	0
ASV144	TCTCTCTTCTATTATTGCACATGGAGGTGCTTCAGTTGATCTAGCAATTTTTTCTCTTCATTTAGCAGGAATTTCATCTATTTTAGGAGCAGTAAATTTTATTACAACAATTATTAATATACGATCTACAGGAATTAATTTTGATCGAATACCTTTATTTGTTTGATCCGTTTTTATTACTGCTATTTTATTACTTCTTTCTCTT	Arthropoda	Insecta	Diptera	Agromyzidae	Agromyzidae sp.	Agromyzidae sp. 04	4630	0	0	0	0	0	0	0	0	0	0	0	0	0	0	0	0	0	0	0	0	0	0	0	0	0	0	0	0	0	0	0	0	0	0	0	0	0	0	0	0	0
ASV145	TCTTTCTTCTATTATTGCTCATGGAGGAGCATCTGTTGACTTAGCAATTTTTTCTCTTCATTTAGCCGGAATTTCTTCAATTTTAGGAGCCGTAAATTTTATTACAACTATTATTAATATACGATCTACTGGAATTACTTTTGACCGAATACCATTATTTGTATGATCAGTTTTTATTACTGCAATTTTATTACTTCTTTCATTA	Arthropoda	Insecta	Diptera	Agromyzidae	Agromyzidae sp.	Agromyzidae sp. 05	1671	0	0	0	0	0	0	0	0	0	0	0	0	0	0	0	0	0	0	0	0	0	0	0	0	0	0	0	0	0	0	0	0	0	0	0	0	0	0	0	0	0
ASV146	TTTATCATCTATCATCGCTCATGGTGGAGCTTCTGTAGATTTAGCAATTTTTTCCTTACATTTAGCAGGAGCTTCTTCTATTTTAGGTGCAGTAAATTTTATTACTACAATTATTAATATACGATCTTCAGGGATTACCTTTGATCGTATACCACTATTTGTTTGATCAGTATTAATTACTGCAGTTTTATTGCTTTTGTCATTA	Arthropoda	Insecta	Diptera	Agromyzidae	Cerodontha	Cerodontha milleri	35661	0	0	0	0	0	0	10879	12119	0	0	0	0	0	0	0	0	0	0	0	0	0	0	0	0	0	0	0	0	0	0	0	0	0	0	0	0	0	0	0	0	0
ASV147	CCTCTCTTCTATTATTGCTCACGGTGGGGCATCTGTTGATCTAGCTATTTTTTCATTACACCTTGCAGGAATTTCTAGAATTTTAGGAGCAGTAAATTTTATTACAACAATTATTAATATGCGATCTACAGGAATTAGATTTGATCGAATACCTTTATTTGTTTGATCTGTTCTTATTACTGCTATCTTATTACTTTTATCTTTA	Arthropoda	Insecta	Diptera	Agromyzidae	Liriomyza	Liriomyza brassicae	37703	0	0	0	0	0	0	0	0	0	0	0	0	0	0	0	0	0	0	0	0	0	0	0	0	0	0	0	0	0	0	0	0	0	0	37690	0	0	0	0	0	0
ASV148	GCTTTCATCAATTATTGCACATGGGGGAGCTTCAGTAGACTTAGCTATTTTTTCTTTACACTTAGCTGGAATTTCTTCTATTTTAGGGGCTGTAAATTTTATTACAACTATTATTAATATACGATCAACAGGAATTAGTTTCGATCGAATACCTTTATTTGTTTGATCAGTATTAATTACTGCAGTATTATTATTACTTTCTCTA	Arthropoda	Insecta	Diptera	Agromyzidae	Liriomyza	Liriomyza chenopodii	357	0	0	0	0	0	0	0	0	0	0	0	0	0	0	0	0	0	0	0	0	0	0	0	0	0	0	0	0	0	0	0	0	0	0	0	0	0	0	0	0	0
ASV149	TTTATCTTCAGTGATTGCTCATGGGGGAGCTTCAGTAGATTTAGCTATTTTTTCACTTCATTTAGCCGGGATTTCTTCAATTTTAGGAGCAGTAAATTTTATTACAACTATTATTAACATACGATCAGTAGGAATTTCTTTTGACCGAATACCATTATTTGTGTGATCAGTTTTAATTACTGCTGTTCTATTACTTCTTTCATTA	Arthropoda	Insecta	Diptera	Agromyzidae	Phytomyza	Phytomyza syngenesiae	208	9	29	1	0	0	4	0	0	0	0	0	0	0	0	0	6	5	43	0	0	6	0	0	0	0	0	0	0	21	0	0	0	0	0	31	3	0	0	0	0	0
ASV150	TTTATCTTCAGTAATTGCCCATGGTGGGAGCTCAGTAGATTTAGCTATTTTTTCTTTACATTTAGCCGGAGTCTCATCAATTTTAGGAGCAGTAAATTTTATTACTACTATTATTAATATACGATCAACAGGAATTACTTTTGACCGAATACCATTATTTGTTTGATCTGTATTAATTACAGCAGTATTATTATTATTATCTTTA	Arthropoda	Insecta	Diptera	Agromyzidae	Pseudonapomyza	Pseudonapomyza sp. EF104731.1	358898	0	0	0	0	0	0	0	0	0	0	0	0	0	0	0	0	0	0	82	157	0	0	0	0	0	0	0	0	0	0	0	0	0	0	0	0	0	0	0	0	0
ASV151	ATTATCTTCTAATATTGCTCATGGTGGAGCTTCTGTTGATTTAGCTATTTTTTCTCTTCATTTAGCAGGAATTTCATCTATTTTAGGAGCTGTAAATTTTATTACTACAGTAATTAATATACGATCAGTAGGAATTACTTTTGATCGAATACCTTTATTTGTTTGATCAGTAGTAATTACAGCTCTATTACTATTATTATCTTTA	Arthropoda	Insecta	Diptera	Anthomyiidae	Anthomyia	Anthomyia nr xanthpyga	773139	0	0	0	0	0	0	0	0	0	0	0	0	0	0	0	0	0	0	0	0	0	0	0	0	0	0	0	0	0	0	0	0	0	0	0	0	0	0	0	0	0
ASV152	TTTATCTTCTAATATTGCTCATGGAGGAGCCTCTGTTGATTTAGCAATTTTCTCTCTTCATTTAGCAGGAATTTCTTCAATTTTAGGAGCCGTAAATTTTATTACCACCGTAATTAATATACGATCAACAGGAATTACATTTGACCGAATACCCCTATTTGTTTGATCAGTGGTAATCACAGCTTTATTACTTTTGTTATCTTTA	Arthropoda	Insecta	Diptera	Anthomyiidae	Anthomyiidae sp.	Anthomyiidae sp. 01	2769	1037	1673	0	0	0	0	0	0	0	0	0	0	0	0	0	0	0	0	0	0	0	0	0	0	0	0	0	0	0	0	0	0	0	0	0	0	0	0	0	0	0
ASV153	TTTATCTTCTATTATTGCCCATGGAGGTGCATCAGTTGATTTAGCCATTTTTTCTTTACATTTAGCAGGTATTTCATCTATTTTAGGGGCTGTAAATTTTATTACAACTGTAATTAATATACGATCAACAGGAATTACATTTGATCGTATACCTTTATTTGTATGATCAGTAGTTATTACAGCTTTATTACTACTTTTATCATTA	Arthropoda	Insecta	Diptera	Anthomyiidae	Anthomyiidae sp.	Anthomyiidae sp. 02	78356	0	0	0	0	0	0	0	0	0	0	0	0	0	0	0	0	0	0	0	0	0	0	0	0	0	0	0	0	0	0	0	0	0	0	0	0	0	0	10074	10574	0
ASV154	TCTTTCAAGTAATATTGCTCATAGTGGAGCTTCTGTTGATTTAGCTATTTTTTCACTACATTTAGCAGGAATTTCATCTATTTTAGGAGCTGTAAATTTTATTACTACAGTAATTAATATACGATCAACAGGAATCACTTTAGATCGTATACCATTATTTGCTTGATCAGTTGTAATTACAGCTGTTTTATTACTTCTCTCTTTA	Arthropoda	Insecta	Diptera	Anthomyiidae	Anthomyiidae sp.	Anthomyiidae sp. 03	54879	0	0	0	0	0	0	0	0	992	0	0	0	0	43	0	0	0	0	0	0	0	0	0	0	0	0	0	0	0	0	0	0	0	0	0	0	0	0	0	0	7030
ASV155	CCTCTCATCTAATATTGCACATGGAGGGGCTTCTGTTGATTTAGCTATTTTCTCTCTACATTTAGCAGGAATTTCATCTATCTTAGGAGCTGTAAATTTTATTACAACGGTAATAAATATACGATCAACAGGAATTACTTTTGATCGAATACCTCTATTTGTTTGATCAGTAGTTATTACAGCCCTTCTTTTATTACTTTCTTGA	Arthropoda	Insecta	Diptera	Anthomyiidae	Anthomyiidae sp.	Anthomyiidae sp. 04	1506	0	0	0	0	0	0	0	0	0	0	0	0	0	0	0	0	0	0	0	0	0	0	0	0	0	0	0	0	0	0	0	1506	0	0	0	0	0	0	0	0	0
ASV156	TTTATCTAATAACATTGCTCATGGTGGAGCTTCTGTTGATTTAGCAATTTTTTCTTTACATTTAGCAGGAATTTCATCAATTTTAGGTGCTGTAAATTTTATTACAACTGTAATTAATATACGATCTAAGGGTATTAGTTTTGACCGAATACCATTATTTGTATGATCAGTAGCAATTACAGCTTTACTTCTTTTACTATCATTA	Arthropoda	Insecta	Diptera	Anthomyiidae	Anthomyiidae sp.	Anthomyiidae sp. nr KY846776.1	2344	0	0	0	0	0	0	0	0	0	0	0	0	0	0	0	0	0	0	0	0	0	0	0	0	0	0	0	0	0	0	0	0	0	0	0	0	0	0	0	0	0
ASV157	ACTATCTTCTAACATTGCTCATGGTGGAGCTTCTGTTGATTTAGCAATTTTTTCCTTACATTTAGCAGGAATTTCATCAATTTTAGGAGCCGTAAATTTTATTACTACTGTAATTAATATACGATCTACAGGAATTACCTTTGATCGAATACCTTTATTTGTTTGATCAGTGGTAATTACAGCATTACTTCTTTTATTATCTTTA	Arthropoda	Insecta	Diptera	Anthomyiidae	Delia	Delia sp.	57645	0	0	0	9639	0	0	0	0	0	0	0	0	0	0	0	0	0	0	0	0	0	0	0	0	0	0	0	0	0	0	0	0	0	0	0	0	0	0	0	0	0
ASV158	TTTATCTTCTAATATTGCTCATGGAGGAGCTTCTGTTGATTTAGCTATTTTTTCTTTACATTTAGCAGGAATTTCCTCAATTTTAGGAGCTGTAAATTTTATTACTACTGTAATTAATATACGATCAACAGGTGTAACTTTTGACCGAATACCTTTATTTGTTTGATCAGTAGTAATTACAGCTTTATTACTTTTATTATCTTTG	Arthropoda	Insecta	Diptera	Calliphoridae	Calliphora	Calliphora augur	286	0	0	0	0	0	0	0	0	0	0	0	0	0	0	0	0	0	0	0	0	0	0	0	0	0	0	0	0	0	0	0	0	0	0	0	0	0	0	0	0	0
ASV159	ATTATCTTCTAATATCGCCCATGGAGGAGCTTCTGTTGATTTAGCTATTTTTTCTTTACATTTAGCAGGAATTTCATCAATTTTAGGAGCTGTAAATTTTATTACAACTGTAATTAATATACGATCTACAGGAATTACATTTGATCGTATACCTTTATTTGTTTGATCTGTAGTAATTACAGCTTTATTACTTTTATTATCATTA	Arthropoda	Insecta	Diptera	Calliphoridae	Calliphora	Calliphora ochracea	92056	0	0	0	0	0	0	0	0	0	0	0	0	0	0	0	0	0	0	0	0	0	0	0	0	0	0	0	0	0	0	0	0	0	0	0	0	0	0	0	0	0
ASV160	TTTATCTTCTAATATCGCCCATGGAGGTGCTTCCGTTGATTTAGCTATTTTCTCTTTACATTTAGCAGGAATTTCTTCAATCTTAGGAGCTGTAAATTTTATCACAACTGTAATCAATATACGATCAACAGGAATTACATTCGACCGAATACCATTATTCGTATGATCCGTAGTAATTACAGCTTTATTACTTTTGTTATCTTTA	Arthropoda	Insecta	Diptera	Calliphoridae	Calliphora	Calliphora sp. 01	327816	0	0	0	0	0	0	0	0	0	0	0	0	0	125	0	0	0	115	0	2	0	94	87	0	0	0	40	0	12	0	115	0	0	0	0	0	0	0	0	0	0
ASV161	ATTATCTGCAAATATTGCCCATAGTGGATCTTCTGTAGATTTAGCTATTTTTTCTTTACATCTAGCTGGAATTTCCTCTATTTTAGGAGCAGTAAATTTTATTACTACAGTTATTAATATACGATCAATAGGAATTACTTTTGATCGAATACCAATATTTGTTTGATCTGTTGTAATTACAGCTTTATTACTATTATTATCTTTA	Arthropoda	Insecta	Diptera	Calliphoridae	Lucilia	Lucilia sp. 01	1338	0	0	0	0	0	0	0	0	0	0	0	0	0	0	0	0	0	0	0	0	0	0	0	0	0	0	0	0	0	0	0	0	0	0	0	0	0	0	0	0	0
ASV162	ACTATCATCTAATATTGCACATGGAGGAGCTTCTGTTGATTTAGCTATTTTTTCTCTTCATTTAGCAGGAATTTCGTCTATTTTAGGAGCTGTTAATTTTATTACAACTGTTATTAATATACGATCAACAGGAATTACTTTTGATCGAATGCCATTATTTGTTTGATCAGTAGTAATTACAGCTCTATTACTTTTATTATCTCTA	Arthropoda	Insecta	Diptera	Calliphoridae	Lucilia	Lucilia sp. 02	140928	1209	1710	4	0	0	3	10	1	0	0	0	10	37	42	10	11	13	66	0	0	4	53	0	7307	0	0	0	3	25	11	129	0	36	40	15	0	0	0	0	0	0
ASV163	TTTATCTTCTAATATTGCCCACGGAGGAGCTTCTGTTGACTTAGCTATTTTTTCCCTCCATTTAGCCGGGGTTTCTTCAATTTTAGGAGCTGTAAACTTTATTACTACTGTAATTAATATACGATCCACAGGAATTACGTTTGACCGAATACCATTATTTGTATGATCAGTAGTAATTACGGCTTTATTACTTTTATTATCTTTA	Arthropoda	Insecta	Diptera	Calliphoridae	Onesia	Onesia dispar	1193	0	0	0	0	0	0	0	0	6	0	4	0	14	55	13	5	0	0	0	0	3	90	125	0	0	0	40	207	0	15	132	0	77	0	13	0	0	0	0	0	0
ASV164	TTTATCATCAATTATTGCTCATAATAGAAGATCTACTGATTTATCAATTTTTTCTCTTCATATTGCTGGAATTTCATCAATTTTAGGAGCTATTAATTTTATTACTACTATCATTAATATAAAAAATAAATTTATTAAATTAAATGAGTTATCACTTTTTATTTGATCAATTTTAATTACTACTATTCTATTATTATTATCATTA	Arthropoda	Insecta	Diptera	Cecidomyiidae	Asphondylia	Asphondylia sp. 01	2368	0	0	0	0	0	0	0	0	0	0	0	0	0	0	0	0	0	0	0	0	0	0	0	0	0	0	0	0	0	0	0	0	0	0	0	0	0	0	0	0	0
ASV165	TTTATCATCAATTATTGCTCATAATAGAAGATCAACCGATCTATCAATTTTTTCTTTACATATTGCTGGAATTTCTTCTATTTTAGGAGCAATTAATTTTATCACTACAATTATTAATATAAAAAATAAATTTATTAAATTAAATGAATTATCACTTTTTATTTGATCAATTTTAATTACTACTGTTCTTTTATTATTATCATTA	Arthropoda	Insecta	Diptera	Cecidomyiidae	Asphondylia	Asphondylia sp. 02	16	0	0	0	0	0	0	0	0	0	0	0	0	0	0	0	0	0	0	0	0	0	0	0	0	0	0	0	0	0	0	0	0	0	0	0	0	0	0	0	0	0
ASV166	TCTATCTTCAACTATTGCCCATTCTGGATCTTCAGTAGATTTATCAATTTTTTCTCTTCACATCGCAGGTATTTCTTCTATTTTAGGAGCAATTAACTTTATTACCACAATAATTAATATACGAATTAAAAATATCTCCTATGATCAAATACCTTTATTTACATGATCAGTAATTATTACAGCTGTTCTTCTTTTATTATCATTA	Arthropoda	Insecta	Diptera	Cecidomyiidae	Cecidomyiidae sp.	Cecidomyiidae sp. 01	80991	0	0	0	0	0	0	0	0	0	0	0	0	0	0	0	0	0	0	0	0	0	0	0	0	0	0	0	0	0	0	0	0	0	0	0	0	0	0	0	0	0
ASV167	TCTTTCTTCAATTATTTCTCATACCGGCCCATCAGTAGATTTATCAATTTTTTCACTCCATTTAGCTGGTATTTCATCTATTTTAGGAGCTATCAATTTCATTACTACTTTTATTAATATACGAATTAATAATTTAAAACTTGATCAAATTCCTTTATTTTCATGATCAGTATTAATTACAGCTATTTTACTTCTTCTCTCCCTC	Arthropoda	Insecta	Diptera	Cecidomyiidae	Cecidomyiidae sp.	Cecidomyiidae sp. 02	4372	0	0	0	0	0	0	0	0	0	0	0	0	0	0	0	0	0	0	0	0	0	0	0	0	0	0	0	0	0	0	0	0	0	0	0	0	0	0	0	0	0
ASV169	ACTTTCTTCTTCAATTGCTCATACAGGTTCATCAGTAGATTTCTCAATTTTTTCTCTCCACATTGCTGGAATTTCATCAATTTTAGGAGCAATCAATTTTATTTCTACAATGTTAAATATAAAAATTAAATATATTAAATTTGATCAAATTTCATTATTTACTTGATCAGTATTAATTACTGCTGTGTTGTTATTATTATCTTTA	Arthropoda	Insecta	Diptera	Cecidomyiidae	Cecidomyiidae sp.	Cecidomyiidae sp. 04	846	0	0	0	0	0	0	0	0	0	0	0	0	0	0	0	0	0	0	0	0	0	0	0	0	0	0	0	0	0	0	0	0	0	0	0	0	0	0	0	0	0
ASV170	TCTTTCATCAGTAATTGCCCATTCGGGTTCTTCCGTAGATTTTTCTATTTTTTCTTTACATATAGCAGGAATTTCATCAATTCTTGGTGCAATTAATTTTATTTCTACAATAATAAATATAAAAATTAAATTCTTAAAATTTAATCAAATTTCTTTATTTACATGATCAATTTTAATTACTACTATTTTACTTCTTCTCTCATTA	Arthropoda	Insecta	Diptera	Cecidomyiidae	Cecidomyiidae sp.	Cecidomyiidae sp. 05	2130	0	0	0	0	0	0	0	0	0	0	0	0	0	0	0	0	0	0	0	0	0	0	0	0	0	0	0	0	8	0	37	0	16	0	104	0	0	0	0	0	0
ASV171	TCTTTCATCAATTATTGCACATACAGGATCTTCTGTAGATTTTTCAATTTTTTCACTTCATATTGCAGGTATCTCATCTATTTTAGGAGCAATTAACTTTATTTCTACAATATTAAATATAAAAATCAAATTTTTAAAATTTGATCAAGTTTCCTTATTTGTATGATCTATTTTAATTACCACTATTCTTTTATTATTATCATTA	Arthropoda	Insecta	Diptera	Cecidomyiidae	Cecidomyiidae sp.	Cecidomyiidae sp. 06	207724	13145	16774	15513	7945	284	0	0	0	6108	0	0	0	0	0	3	0	0	0	0	0	0	0	0	0	0	0	0	0	825	0	0	0	19	0	0	0	0	0	0	0	0
ASV172	CCTTTCATCAATTATTGCTCATACTGGTTCATCAGTAGATTTTTCAATTTTTTCATTACATATTGCTGGAATTTCATCAATTTTAGGAGCAATTAATTTTATTTCTACAATATTAAATATAAAAATTAAATTTTTAAAATTTGACCAAGTTTCTTTATTTGTTTGATCTATTTTAATTACTACTATTTTACTACTATTATCTTTA	Arthropoda	Insecta	Diptera	Cecidomyiidae	Cecidomyiidae sp.	Cecidomyiidae sp. 07	85351	3609	4185	2111	0	0	0	0	0	3531	0	2573	1	0	0	0	0	0	0	0	0	0	0	0	0	0	0	0	0	0	0	0	0	0	0	0	0	0	0	0	0	0
ASV173	TCTTTCTTCTATTATTGCCCATACAGGATCATCCGTAGATTTTTCAATTTTTTCTTTACATATTGCAGGAATTTCATCAATCTTAGGAGCAATTAATTTTATTTCAACAATATTGAATATAAAAATTAAATTTATTAAATTTAATCAAATCTCTCTATTTATTTGATCAATTTTTATTACAACAATTTTATTATTACTTTCATTA	Arthropoda	Insecta	Diptera	Cecidomyiidae	Cecidomyiidae sp.	Cecidomyiidae sp. 08	49687	0	0	0	0	0	0	0	0	0	0	0	0	0	0	0	0	0	0	0	0	0	0	0	0	0	0	0	0	0	0	0	0	0	0	0	0	0	0	0	0	0
ASV174	TTTATCTTCAATTATTGCTCATACGGGGTCATCTGTAGATTTTTCAATTTTTTCTTTACATATTGCAGGAATTTCTTCAATTTTAGGAGCTATTAATTTTATTTCTACAATAATAAATATAAAAATTAAATTTTTAAAATTTGATCAATTATCATTATTTTCATGATCAGTTTTAATTACAGCAGTTTTATTATTATTATCTCTT	Arthropoda	Insecta	Diptera	Cecidomyiidae	Cecidomyiidae sp.	Cecidomyiidae sp. 09	28832	0	0	0	0	0	0	0	0	0	0	0	0	0	0	0	0	0	0	0	0	0	0	0	0	0	0	0	0	0	0	0	0	0	0	0	0	0	0	0	0	0
ASV175	TTTATCTTCAATTATTGCCCATACAGGATCTTCTGTTGATTTTTCAATTTTTTCTTTACATATTGCAGGAATCTCATCAATTTTAGGAGCAATTAATTTTATTTCTACAATATTAAACATAAAAATTAAATTTTTAAAATTTGATCAAATTTCATTATTTGTGTGATCTATTTTAATTACGACTGTTTTACTTCTTCTTTCCTTA	Arthropoda	Insecta	Diptera	Cecidomyiidae	Cecidomyiidae sp.	Cecidomyiidae sp. 10	31140	0	0	0	0	0	0	0	0	0	0	0	0	0	0	0	0	0	0	0	0	0	0	0	0	0	0	0	0	0	0	0	0	0	0	0	0	0	0	0	0	0
ASV176	CCTTTCTTCAATTATTGCACATACAGGATCCGCTGTTGACTTTTCAATTTTTTCCCTCCATATTGCAGGAATTTCTTCAATTTTAGGAGCAATTAATTTCATTTCAACAATAATTAATATAAAAATTAAATTTTTAAAATTTAATCAAATTTCTCTATTTATTTGATCAATCTTAATTACAACTATTTTACTTCTTCTTTCTTTA	Arthropoda	Insecta	Diptera	Cecidomyiidae	Cecidomyiidae sp.	Cecidomyiidae sp. 11	12866	0	0	0	0	0	0	0	0	0	0	0	0	0	0	0	0	0	0	0	0	0	0	0	0	0	0	0	0	0	0	0	0	0	0	0	0	0	0	0	0	0
ASV177	CCTATCTTCAGTAATTGCACATACAGGATCAGCAGTAGATTTTTCAATTTTTTCTCTTCATATTGCCGGTATTTCTTCTATTCTAGGAGCCATTAATTTTATTTCTACAATAATTAATATAAAAATCAAATTTTTAAAATTTAATCAAATTTCATTATTTGTTTGATCTATTTTAATTACTACTATTCTTCTTCTTTTATCTTTA	Arthropoda	Insecta	Diptera	Cecidomyiidae	Cecidomyiidae sp.	Cecidomyiidae sp. 12	57010	633	714	0	0	0	0	1679	2456	3964	0	536	0	0	0	0	0	0	0	0	0	0	0	0	0	0	0	0	0	0	22	1152	0	0	6	0	0	0	0	0	0	0
ASV178	TCTTTCATCAATTATTGCTCATACAGGATCATCAGTTGATTTTTCTATTTTTTCGTTACATATAGCTGGAATTTCATCAATTTTAGGAGCTATTAATTTTATTTCTACAATATTAAATATAAAAATTAAATTCTTAAAATTTGACCAAATTTCCTTATTTGTTTGATCAATTTTAATTACTACTATTTTATTACTTCTTTCATTA	Arthropoda	Insecta	Diptera	Cecidomyiidae	Cecidomyiidae sp.	Cecidomyiidae sp. 13	7066	0	0	0	0	0	0	0	0	0	0	0	0	0	0	0	0	0	0	0	0	0	0	0	0	0	0	0	0	0	0	0	0	0	0	0	0	0	0	0	0	0
ASV179	TCTTTCTTCAGTAATTGCCCATACAGGATCTTCAGTTGATTTTTCTATTTTCTCTTTACATATTGCAGGAATTTCTTCAATTCTTGGGGCAATTAATTTCATTTCAACAATAATTAATATAAAAATTAAATTTTTAAAATTTAATCAAATTTCACTATTTGTTTGATCAATTTTAATTACTACTATTTTACTTTTACTTTCATTA	Arthropoda	Insecta	Diptera	Cecidomyiidae	Cecidomyiidae sp.	Cecidomyiidae sp. 14	4668	0	0	0	0	0	0	0	0	0	0	0	0	0	0	0	0	0	0	0	0	0	0	0	0	0	0	0	0	0	0	0	0	0	0	0	0	0	0	0	0	0
ASV180	TCTTTCTTCTGTTATTGCCCATACAGGATCATCAGTAGATTTCTCAATTTTTTCATTACATATTGCGGGTATTTCTTCAATTTTAGGAGCTATTAATTTTATTTCAACAATATTAAACATAAAAATTAAATTTTTAAAATTTGACCAAATCTCTTTATTTGTTTGATCAATTTTAATTACGACAGTTCTACTTTTATTATCCTTA	Arthropoda	Insecta	Diptera	Cecidomyiidae	Cecidomyiidae sp.	Cecidomyiidae sp. 15	3266	0	0	0	0	0	0	0	0	0	0	0	0	0	0	0	0	0	0	0	0	0	0	0	0	0	0	0	0	0	0	0	0	0	0	0	0	0	0	0	0	0
ASV181	TTTATCTTCAATTATTGCTCATACAGGAACATCTGTAGATTTTTCTATTTTTTCTTTACATATTGCTGGAATTTCATCAATTTTAGGGGCAATTAATTTTATTTCAACTATAATAAATATAAAAATTAAATTTTTAAAATTTGACCAAATCTCATTATTTATTTGATCAATTTTAATTACTACAATTTTATTATTATTATCACTT	Arthropoda	Insecta	Diptera	Cecidomyiidae	Cecidomyiidae sp.	Cecidomyiidae sp. 16	3163	0	0	0	0	0	0	0	0	0	0	0	0	0	0	0	0	0	0	0	0	0	0	0	0	0	0	0	0	0	0	0	0	0	0	0	0	0	0	0	0	0
ASV182	CCTTTCTTCAATTATTGCTCACACCGGATCTTCTGTTGATTTTTCTATTTTTTCTTTACATATTGCAGGAATTTCATCAATTCTTGGAGCAATTAATTTTATTTCAACAATAATTAATATAAAAATTAAATTTTTAAAATTTAATCAAATCTCATTATTTGTTTGATCAATTTTAATTACTACAATTTTACTTTTACTTTCATTA	Arthropoda	Insecta	Diptera	Cecidomyiidae	Cecidomyiidae sp.	Cecidomyiidae sp. 17	2254	0	0	0	0	0	0	992	1262	0	0	0	0	0	0	0	0	0	0	0	0	0	0	0	0	0	0	0	0	0	0	0	0	0	0	0	0	0	0	0	0	0
ASV183	CCTATCTTCAATTATTGCTCATACAGGATCCTCAGTAGATTTTTCTATTTTCTCATTACATATTGCTGGAATTTCCTCAATTTTAGGAGCTATTAATTTTATTTCTACTATAATAAATATAAAAATTAAATTTCTAAAATTTAACCAAATTTCTTTATTTATTTGATCTATTTTAATCACCACAATTTTATTATTATTATCATTA	Arthropoda	Insecta	Diptera	Cecidomyiidae	Cecidomyiidae sp.	Cecidomyiidae sp. 18	832	0	0	0	0	0	0	0	0	0	0	0	0	0	0	0	0	0	0	0	0	0	0	0	0	0	0	0	0	0	0	0	0	0	0	0	0	0	0	0	0	0
ASV184	ACTCTCATCAATCATTGCTCACACCGGATCATCAGTAGATTTTTCAATTTTCTCATTACATATTGCAGGAATTTCATCAATTTTAGGGGCAATTAATTTTATTTCCACTATATTAAATATAAAAATTAAATTTTTAAAATTTGATCAAATTTCATTATTTGTTTGATCAATTTTAATTACTACTGTTTTATTATTATTATCATTA	Arthropoda	Insecta	Diptera	Cecidomyiidae	Cecidomyiidae sp.	Cecidomyiidae sp. 19	3280	0	0	0	0	0	0	100	186	790	0	0	0	0	0	0	0	0	0	0	0	0	0	0	0	0	0	0	0	0	0	0	0	0	0	0	0	0	0	0	0	0
ASV185	TTTATCATCTGTACTTGCTCATACAGGATCTTCAGTTGATTTTTCTATTTTTTCACTTCATATTGCAGGTATTTCTTCAATTTTAGGAGCAATTAACTTTATTTCAACAATGATAAATATAAAAATTAAATTTCTAAAATTTAATCAAATTTCATTATTTGTTTGATCAATTTTAATTACTACAATTTTATTATTATTATCTCTT	Arthropoda	Insecta	Diptera	Cecidomyiidae	Cecidomyiidae sp.	Cecidomyiidae sp. 20	2767	0	0	0	0	0	0	149	235	140	0	0	0	0	0	0	0	0	0	0	0	0	0	0	0	0	0	0	0	0	0	0	0	0	0	0	0	0	0	0	0	0
ASV186	TTTATCTTCAATTATCGCCCATACTGGATCTTCTGTTGATTTTTCAATTTTTTCTTTGCATATAGCAGGTATTTCATCAATTTTAGGAGCAATCAATTTTATCTCTACAATATTAAATATAAAAATTAAATTTTTAAAATTTGATCAAATTTCATTATTTGTATGATCAATTTTAATTACAACTATTTTATTATTACTATCTTTA	Arthropoda	Insecta	Diptera	Cecidomyiidae	Cecidomyiidae sp.	Cecidomyiidae sp. 21	1060	0	0	0	0	0	0	0	0	0	0	0	0	0	0	0	0	0	0	0	0	0	0	0	0	0	0	0	0	0	0	0	0	0	0	0	0	0	0	0	0	0
ASV187	TCTATCATCAACAATTGCTCATACAGGGTCATCAGTTGATTTTTCAATTTTTTCATTACATATTGCTGGAATTTCATCTATTTTAGGAGCTATCAATTTTATTTCTACAATATTTAATATAAAAATTAAATTTTTAAAATTTGATCAAATTTCATTATTTACTTGATCTGTTTTAATTACTGCATTTTTATTACTATTATCATTA	Arthropoda	Insecta	Diptera	Cecidomyiidae	Cecidomyiidae sp.	Cecidomyiidae sp. 22	128	0	0	0	0	0	0	0	0	0	0	0	0	0	0	0	0	0	0	0	0	0	0	0	0	0	0	0	0	0	0	128	0	0	0	0	0	0	0	0	0	0
ASV188	ATTATCTTCTATTATTTCACATACAGGATCTTCAGTTGATTTTTCAATTTTTTCTTTACATATTGCTGGAATTTCTTCTATTTTAGGAGCAATTAATTTTATTTCAACAATATTAAATATAAAAATCAAATTTTTAAAATTTAATCAAATTTCATTATTTATTTGATCTATTTTTATTACAACTATTCTTTTATTATTATCTTTA	Arthropoda	Insecta	Diptera	Cecidomyiidae	Cecidomyiidae sp.	Cecidomyiidae sp. 23	27267	0	0	0	0	0	0	0	0	0	0	0	0	0	0	0	0	0	0	0	0	0	0	0	0	0	0	0	0	0	0	0	0	0	0	0	0	0	0	0	0	0
ASV189	TCTTTCTTCAATTATTGCTCATACCGGATCTTCAGTAGATTTTTCTATTTTTTCTTTACATATTGCAGGTATTTCATCAATTTTAGGGGCAATTAATTTTATTTCTACAATACTAAATATAAAAATTAAATTTTTAAAATTTGATCAAATTTCATTATTTATTTGATCAATTTTAATTACTACAGTTTTATTACTTTTATCACTA	Arthropoda	Insecta	Diptera	Cecidomyiidae	Cecidomyiidae sp.	Cecidomyiidae sp. 24	5050	0	0	0	0	0	0	0	0	0	0	0	0	0	0	0	0	0	0	0	0	0	0	0	0	0	0	0	0	0	0	0	0	0	0	0	0	0	0	0	0	0
ASV190	TTTATCTTCAATTATTGCTCATACTGGATCTTCTGTAGATTTTTCTATTTTTTCACTTCATATTGCAGGTATTTCATCTATTTTAGGAGCAATTAATTTTATTTCAACAATATTAAATATAAAAATTAAATTTTTAAAATTCGATCAAATTTCCCTTTTTGTATGATCAATTTTAATTACAACAGTATTATTATTATTATCATTA	Arthropoda	Insecta	Diptera	Cecidomyiidae	Cecidomyiidae sp.	Cecidomyiidae sp. 25	8957	0	0	0	0	0	0	0	0	0	0	0	0	0	0	0	0	0	0	0	0	0	0	0	0	0	0	0	0	0	0	0	0	0	0	0	0	0	0	0	0	0
ASV191	TCTTTCTTCAATTATTGCTCATACTGGATCTTCAGTAGATTTTTCAATTTTTTCTCTCCATATTGCAGGAATTTCTTCAATTTTAGGAGCTATTAATTTTATTTCTACTATAATAAATATAAAAATTAAATTTTTAAAATTTGACCAAATTTCTTTATTTATTTGATCAATTTTAATTACTACAATTCTTCTTCTTCTTTCTTTA	Arthropoda	Insecta	Diptera	Cecidomyiidae	Cecidomyiidae sp.	Cecidomyiidae sp. 26	3056	0	0	0	0	0	0	0	0	0	0	0	0	0	0	0	0	0	0	0	0	0	0	0	0	0	0	0	0	0	0	0	0	0	0	0	0	0	0	0	0	0
ASV192	TTTATCATCAACAATTGCACATACAGGTTCTTCTGTAGATTTTTCAATTTTTTCATTACATATTGCTGGAATTTCATCTATTTTAGGTGCTATTAATTTTATTTCAACAATATTTAATATAAAAATTAAATTTTTAAAATTTGATCAAATTTCACTTTTTACATGATCAGTATTAATTACTGCATTTTTATTATTATTATCATTA	Arthropoda	Insecta	Diptera	Cecidomyiidae	Cecidomyiidae sp.	Cecidomyiidae sp. 27	2923	0	0	0	0	0	0	0	0	0	0	0	0	0	0	0	0	0	0	0	0	0	0	0	0	0	0	0	0	0	0	0	0	0	0	0	0	0	0	0	0	0
ASV193	TCTTTCTTCATCTATTGCACATACAGGATCATCAGTTGATTTTTCAATTTTTTCATTACATATTGCTGGAATTTCATCAATTTTAGGAGCTATTAATTTTATTTCTACAATATTAAATATAAAAATTAAATATATTAAATTTGATCAAATTTCTTTATTTACTTGATCAGTACTAATTACTGCAGTTTTATTATTATTATCTTTA	Arthropoda	Insecta	Diptera	Cecidomyiidae	Cecidomyiidae sp.	Cecidomyiidae sp. 28	2778	0	0	0	0	0	0	0	0	0	0	0	0	0	0	0	0	0	0	0	0	0	0	0	0	0	0	0	0	0	0	0	0	0	0	0	0	0	0	0	0	0
ASV194	TCTTTCATCAATTATTGCTCATACAGGATCTTCTGTAGATTTTTCAATTTTTTCTCTTCATATTGCTGGAATTTCATCTATTTTAGGAGCAATTAATTTTATTTCTACAATTAAAAATATAAAAATTAAATTTTTAAAATTTAATCAAATTTCTTTATTTATTTGATCAATTTTAATTACAACAATTTTATTACTTATTTCCCTA	Arthropoda	Insecta	Diptera	Cecidomyiidae	Cecidomyiidae sp.	Cecidomyiidae sp. 29	2678	0	0	0	0	0	0	0	0	0	0	0	0	0	0	0	0	0	0	0	0	0	0	0	0	0	0	0	0	2678	0	0	0	0	0	0	0	0	0	0	0	0
ASV195	GCTTTCTTCAATCATTGCTCATACAGGATCATCAGTTGATTTTTCAATTTTTTCATTACATATTGCAGGAATTTCATCAATTATAGGAGCTATTAATTTTATTTCAACTATACTAAATATAAAAATTAAATTTTTAAAATTTGATCAAATTTCATTATTTATTTGATCAATTTTAATTACTACAATTTTATTACTTTTATCATTA	Arthropoda	Insecta	Diptera	Cecidomyiidae	Cecidomyiidae sp.	Cecidomyiidae sp. 30	2965	0	0	0	0	0	0	0	0	0	0	0	0	0	0	0	0	0	0	0	0	0	0	0	0	0	0	0	0	0	0	0	0	0	0	0	0	0	0	0	0	0
ASV196	TCTTTCATCAATTATTGCTCATACTGGATCAGCAGTAGATTTTTCAATTTTTTCTCTTCATATTGCAGGAATTTCATCAATTTTAGGAGCAATTAATTTTATTTCTACAATAATTAATATAAAAATTAAATTTTTAAAATTTAATCAAATTTCATTATTTGTTTGATCTATTTTAATTACTACAATTCTTTTATTACTTTCATTG	Arthropoda	Insecta	Diptera	Cecidomyiidae	Cecidomyiidae sp.	Cecidomyiidae sp. 31	1937	0	0	0	0	0	0	0	0	0	0	0	0	0	0	0	0	0	0	0	0	607	0	0	0	0	0	0	0	0	0	0	0	0	0	0	0	0	0	0	0	0
ASV197	ATTATCATCTATTATTGCACATACAGGTTCATCTGTAGACTTTTCAATTTTTTCTTTACACATTGCTGGTATTTCTTCAATTTTAGGAGCTATTAATTTTATTTCAACTATATTAAATATAAAAATTAAATTTTTAAAATTTGATCAAATTTCATTATTTATTTGATCTATTTTAATTACTACAGTATTATTATTACTATCTTTA	Arthropoda	Insecta	Diptera	Cecidomyiidae	Cecidomyiidae sp.	Cecidomyiidae sp. 32	1719	33	42	0	0	0	0	0	0	331	0	0	0	0	0	0	0	0	0	0	0	0	0	0	0	0	0	0	0	0	0	0	0	0	0	0	0	0	0	0	0	151
ASV198	TCTTTCATCAATTATTGCTCATACAGGTTCATCTGTAGATTTTTCAATTTTTTCATTACATATCGCTGGAATTTCATCAATTCTAGGAGCTATTAATTTTATTTCAACTATATTAAATATAAAAATTAAATTTTTAAAATTTGATCAAATTTCATTATTTATCTGATCAATTTTAATTACTACTATTTTACTACTTTTATCTTTA	Arthropoda	Insecta	Diptera	Cecidomyiidae	Cecidomyiidae sp.	Cecidomyiidae sp. 33	1412	0	0	0	0	0	0	0	0	0	0	0	0	0	0	0	0	0	0	0	0	0	0	0	0	0	0	0	0	0	0	0	0	0	0	0	0	0	0	0	0	0
ASV199	TCTATCTTCAATTATTGCTCACACAGGATCAGCTGTTGATTTTTCAATTTTTTCTCTTCATATTGCAGGAATTTCTTCAATTTTAGGAGCTATTAATTTTATTTCAACAATAATTAATATAAAAATTAAATTTTTAAAATTTAATCAAATTTCATTATTTGTTTGATCAATTTTAATTACTACTATTCTTCTTCTTTTATCTTTA	Arthropoda	Insecta	Diptera	Cecidomyiidae	Cecidomyiidae sp.	Cecidomyiidae sp. 34	1372	0	0	0	0	0	0	0	0	0	0	0	0	0	0	0	0	0	0	0	0	0	0	0	0	0	0	0	0	0	0	0	0	0	0	0	0	0	0	0	0	0
ASV200	CCTATCCTCTTCAATTGCTCATACAGGATCATCTGTTGATTTTTCAATTTTTTCATTACATATTGCAGGAATCTCATCTATTTTAGGAGCTATTAACTTTATTTCAACAATATTAAATATAAAAATTAAATTTATTAAATTTGATCAAATTTCTTTATTTACTTGATCAGTTTTAATTACAGCCGTATTACTTCTTTTATCATTA	Arthropoda	Insecta	Diptera	Cecidomyiidae	Cecidomyiidae sp.	Cecidomyiidae sp. 35	1312	0	0	0	0	0	0	0	0	0	0	0	0	0	0	0	0	0	0	0	0	0	0	0	0	0	0	0	0	0	0	0	0	0	0	0	0	0	0	0	0	0
ASV201	ACTATCTTCAGTTATTGCTCATACAGGTTCTTCAGTAGATTTCTCTATTTTTTCTCTTCATATTGCAGGAATTTCTTCAATTTTAGGAGCCATTAATTTTATTTCTACAATATTAAATATAAAAATTAGATTTTTAAAATTTAATCAAATTTCTCTATTTATTTGATCAATTTTTATTACAACAATTTTATTATTATTATCTTTA	Arthropoda	Insecta	Diptera	Cecidomyiidae	Cecidomyiidae sp.	Cecidomyiidae sp. 36	843	0	0	0	0	0	0	0	0	0	0	0	0	0	0	0	0	0	0	0	0	0	0	0	0	0	0	0	0	843	0	0	0	0	0	0	0	0	0	0	0	0
ASV202	TCTTTCATCAATTATTGCTCATACAGGATCATCAGTAGATTTTTCAATTTTTTCATTACATATTGCAGGAATTTCATCTATTTTAGGAGCAATTAATTTTATTTCTACAATATTAAATATAAAAATTAAATTTTTAAAATTTAATCAAATTTCATTATTTATTTGATCTATTTTTATTACAACAATTTTATTATTATTATCACTA	Arthropoda	Insecta	Diptera	Cecidomyiidae	Cecidomyiidae sp.	Cecidomyiidae sp. 37	1277	0	0	0	0	0	0	0	0	0	0	0	0	0	0	0	0	0	0	0	0	0	0	0	0	0	0	0	0	0	0	0	0	0	0	0	0	0	0	0	0	0
ASV203	CCTTTCATCAATTATTGCTCATACAGGATCTTCAGTAGATTTTTCAATTTTTTCACTCCATATTGCAGGTATTTCATCTATTTTAGGAGCAATTAATTTTATTTCTACAATATTAAATATAAAAATTAAATTTTTAAAATTTGATCAAATTTCTTTATTCGTATGATCTATTTTAATTACTACTATTCTTTTATTATTATCATTA	Arthropoda	Insecta	Diptera	Cecidomyiidae	Cecidomyiidae sp.	Cecidomyiidae sp. 38	1248	0	0	745	0	0	0	0	0	0	0	0	0	0	0	0	0	0	0	0	0	0	0	0	0	0	0	0	0	0	0	0	0	0	0	0	0	190	0	0	0	0
ASV204	TCTTTCATCAATTATTGCACATACAGGATCTTCTGTAGATTTTTCAATTTTTTCACTTCATATTGCAGGTATTTCATCTATTTTAGGGGCAATTAACTTTATTTCTACAATATTAAATATAAAAATTAAATTTTTAAAATTTGATCAAATTTCTTTATTTGTATGATCTATTTTAATTACTACTATTCTTTTATTATTATCCCTA	Arthropoda	Insecta	Diptera	Cecidomyiidae	Cecidomyiidae sp.	Cecidomyiidae sp. 39	743	165	199	0	0	0	0	144	235	0	0	0	0	0	0	0	0	0	0	0	0	0	0	0	0	0	0	0	0	0	0	0	0	0	0	0	0	0	0	0	0	0
ASV205	TCTTTCTTCTTCTATTGCTCATACAGGATCATCAGTAGACTTTTCAATCTTTTCTTTACATATTGCAGGTATTTCCTCAATTTTAGGAGCTATTAATTTTATTTCAACAATATTAAATATAAAAATTAAATATATTAAATTTGATCAAATCTCTTTATTTACTTGATCAGTTTTAATTACTGCCGTACTTTTATTACTTTCATTA	Arthropoda	Insecta	Diptera	Cecidomyiidae	Cecidomyiidae sp.	Cecidomyiidae sp. 40	714	0	0	0	0	0	0	0	0	0	0	0	0	0	0	0	0	0	0	0	0	0	0	0	0	0	0	0	0	0	0	0	0	0	0	0	0	0	0	0	0	0
ASV206	TCTTTCATCAATTATTGCTCACACAGGATCTTCTGTAGATTTTTCTATTTTTTCTCTTCATATTGCTGGAATTTCATCTATTTTAGGAGCAATTAATTTTATTTCTACAATATTAAATATAAAAATTAAATTTTTAAAATTTAATCAAATTTCTTTATTTATTTGATCAATTTTCATTACAACAATTTTATTACTTCTCTCTTTA	Arthropoda	Insecta	Diptera	Cecidomyiidae	Cecidomyiidae sp.	Cecidomyiidae sp. 41	669	0	0	0	0	0	0	0	0	0	0	0	0	0	0	0	0	0	0	0	0	0	0	0	0	0	0	0	0	0	0	0	0	669	0	0	0	0	0	0	0	0
ASV207	TCTTTCATCATCAATTGCTCACACAGGATCATCTGTAGATTTTTCAATTTTTTCTCTTCATATTGCAGGAATTTCTTCAATTTTAGGAGCTATTAATTTTATTTCAACTATATTAAATATAAAAATTAAATTTTTAAAATTAGATCAAATCTCATTATTTACTTGATCTGTATTAATTACAGCAGTTTTATTATTATTATCTTTA	Arthropoda	Insecta	Diptera	Cecidomyiidae	Cecidomyiidae sp.	Cecidomyiidae sp. 42	572	0	0	0	0	0	0	0	0	0	0	0	0	0	0	0	0	0	0	0	0	0	0	0	0	0	0	0	0	0	0	0	0	0	0	0	0	0	0	0	0	0
ASV208	TTTATCATCAATTATTGCTCATACAGGATCATCAGTAGATTTTTCAATTTTTTCTCTTCATATTGCAGGAATTTCATCAATTTTAGGAGCTATTAATTTTATTTCAACAATATTTAATATAAAAATTAAATATTTAAAATTTGATCAAATTTCATTATTTACATGATCTGTACTAATTACTGCATTTTTATTATTATTATCATTA	Arthropoda	Insecta	Diptera	Cecidomyiidae	Cecidomyiidae sp.	Cecidomyiidae sp. 43	537	0	0	0	0	0	0	0	0	0	0	0	0	0	0	0	0	0	0	0	0	0	0	0	0	0	0	0	0	0	0	0	0	0	0	0	0	0	0	0	0	0
ASV209	TCTTTCTTCTTCAATTGCTCATACAGGATCATCAGTAGATTTTTCAATTTTTTCATTACATATTGCAGGTATTTCATCAATTTTAGGAGCTATTAATTTTATTTCTACAATACTTAATATAAAAATTAAATATATTAAATTTGATCAAATTTCATTATTTACTTGATCAGTATTAATTACTGCAGTTCTTTTACTTTTATCATTA	Arthropoda	Insecta	Diptera	Cecidomyiidae	Cecidomyiidae sp.	Cecidomyiidae sp. 44	509	0	0	0	0	0	0	21	46	0	0	0	0	0	0	0	0	0	0	0	0	0	0	0	0	0	0	0	0	12	0	0	0	0	0	0	0	0	0	0	0	0
ASV210	TTTATCATCAATTATTGCTCATACAGGATCATCAGTAGATTTTTCAATTTTTTCTTTACATATTGCAGGAATTTCATCAATTTTAGGAGCTATTAACTTTATTTCTACTATATTAAATATAAAGATTAAATTTTTAAAATTTAATCAAATTTCTTTATTTATTTGATCAATCTTTATTACAACAATTCTATTATTATTATCATTG	Arthropoda	Insecta	Diptera	Cecidomyiidae	Cecidomyiidae sp.	Cecidomyiidae sp. 45	288	0	0	0	0	0	0	0	0	0	0	0	0	0	0	0	0	0	0	0	0	0	0	0	0	0	0	0	0	0	0	0	0	0	0	0	0	0	0	0	0	0
ASV211	TCTTTCTTCAATTATTGCCCATACTGGATCATCAGTTGACTTTTCAATTTTTTCTTTACATATTGCAGGAATTTCATCAATTTTAGGAGCTATTAATTTTATTTCAACAATATTAAATATAAAAATTAAATTTTTAAAATTTAATCAAATTTCATTATTTATTTGATCAATTTTTATTACAACAATTTTACTTTTATTATCATTA	Arthropoda	Insecta	Diptera	Cecidomyiidae	Cecidomyiidae sp.	Cecidomyiidae sp. 46	283	0	0	0	0	0	0	0	0	0	0	0	0	0	0	0	0	0	0	0	0	0	0	0	0	0	0	0	0	0	0	0	0	0	0	0	0	0	0	0	0	0
ASV212	CCTTTCTTCAATTATCGCACATACAGGATCATCAGTAGATTTTTCAATCTTTTCATTACATATAGCTGGAATTTCATCAATTTTAGGAGCTATTAATTTTATTTCAACTATATTAAATATAAAAATTAAATTTTTAAAATTTGATCAAATTTCTTTATTTGTTTGATCAATTTTAATTACAACAATTTTATTATTATTATCACTA	Arthropoda	Insecta	Diptera	Cecidomyiidae	Cecidomyiidae sp.	Cecidomyiidae sp. 47	271	0	0	0	0	0	0	0	0	0	0	0	0	0	0	0	0	0	0	0	0	0	0	0	0	0	0	0	0	0	0	0	0	0	0	0	0	0	0	0	0	0
ASV214	TCTTTCATCAATTATTGCTCATACAGGATCTTCTGTAGATTTTTCAATTTTTTCTCTACATATTGCAGGTATTTCATCTATTTTAGGAGCAATTAACTTTATTTCTACAATATTAAATATAAAAATCAAATTTTTAAAATTTGATCAAATTTCTTTATTTGTATGATCTATTTTAATCACTACTATTCTTTTATTACTATCATTA	Arthropoda	Insecta	Diptera	Cecidomyiidae	Cecidomyiidae sp.	Cecidomyiidae sp. 49	189	79	110	0	0	0	0	0	0	0	0	0	0	0	0	0	0	0	0	0	0	0	0	0	0	0	0	0	0	0	0	0	0	0	0	0	0	0	0	0	0	0
ASV215	TCTATCATCAACAATTGCACATACAGGATCATCAGTTGATTTTTCAATTTTTTCATTACATATTGCAGGTATTTCATCAATTTTAGGAGCTATTAATTTTATTTCAACAATATTTAATATAAAAATTAAATTTTTAAAATTTGATCAAATTTCTTTATTTACTTGATCAGTATTAATTACTGCATTTTTATTATTATTATCATTA	Arthropoda	Insecta	Diptera	Cecidomyiidae	Cecidomyiidae sp.	Cecidomyiidae sp. 50	164	0	0	0	0	0	0	0	0	0	0	0	0	0	0	0	0	0	0	0	0	0	0	0	0	0	0	0	0	0	0	0	0	0	0	0	0	0	0	0	0	0
ASV216	TCTTTCTTCAATTATTGCCCATACAGGATCTGCTGTTGATTTTTCAATTTTTTCTCTTCATATTGCAGGAATTTCTTCAATTTTAGGAGCTATTAATTTTATTTCAACAATAATTAATATAAAAATTAAATTTTTAAAATTTAATCAAATTTCATTATTTGTTTGATCAATTTTAATTACAACTGTTTTACTTCTTTTATCATTA	Arthropoda	Insecta	Diptera	Cecidomyiidae	Cecidomyiidae sp.	Cecidomyiidae sp. 51	142	0	0	0	0	0	0	0	0	0	0	0	0	0	0	0	0	0	0	0	0	0	0	0	0	0	0	0	0	0	0	0	0	0	0	0	0	0	0	0	0	0
ASV217	TTATCTTCAATTATTGCACATACAGGATCTTCAGTTGATTTTTCAATTTTTTCACTTCATATTGCAGGAATCTCATCAATTTTAGGAGCAATTAATTTTATTTCAACAATATTAAATATAAAAATTAAATTTTTAAAATTTGACCAAATTTCACTATTTGTATGATCAATTTTAATTACTACTGTTTTACTTTTACTTTCATTA	Arthropoda	Insecta	Diptera	Cecidomyiidae	Cecidomyiidae sp.	Cecidomyiidae sp. 52	246	0	0	0	0	0	0	0	0	0	0	0	0	0	0	0	0	0	0	0	0	0	0	0	0	0	0	0	0	0	0	0	0	0	0	0	0	0	0	0	0	0
ASV219	TTTATCATCAATTATTGCACATACAGGATCTTCAGTAGATTTTTCAATTTTTTCATTACATATTGCAGGTATTTCATCAATTTTAGGTGCAATTAATTTTATTTCAACAACAATTAATATAAAAATTAAATTTTTAAAATTCGACCAAATTTCTCTATTTACATGATCTGTTTTAATTACTGCTATTTTATTACTTTTGTCATTA	Arthropoda	Insecta	Diptera	Cecidomyiidae	Cecidomyiidae sp.	Cecidomyiidae sp. 54	32	0	0	0	0	0	0	0	0	0	0	0	0	0	0	0	0	0	0	0	0	0	0	0	0	0	0	0	0	0	0	0	0	0	0	0	0	0	0	0	0	0
ASV225	ACTATCTTCAGTAATTGCTCATACAGGATCAGCAGTTGATTTTTCAATTTTTTCTCTTCATATTGCAGGAATTTCATCAATTTTAGGAGCTATTAATTTTATTTCAACAATGATAAATATAAAAATTAAATTTTTAAAATTTAATCAAATTTCCTTATTTACCTGATCAATTTTAATTACAACAATTCTTTTACTACTTTCTTTA	Arthropoda	Insecta	Diptera	Cecidomyiidae	Cecidomyiidae sp.	Cecidomyiidae sp. nr JF872479.1	7731	0	0	0	0	0	0	0	0	67	0	0	0	0	0	0	0	0	0	0	0	0	0	0	0	0	0	0	0	0	0	41	0	943	0	0	0	0	0	0	0	68
ASV226	TCTTTCTTCAATTATTGCTCATACAGGAACATCAGTAGACTTTTCAATTTTTTCTTTACATATTGCAGGAATTTCTTCAATTTTAGGAGCAATTAACTTTATTTCTACTATATTAAATATAAAAATTAATTTTTTAAAATTTGATCAAATTTCATTATTTATTTGATCAATTTTAATTACAACTGTTCTTCTTTTATTATCTTTA	Arthropoda	Insecta	Diptera	Cecidomyiidae	Contarinia	Contarinia jongi	300	0	0	0	0	0	0	0	0	0	0	0	0	0	0	0	0	0	0	0	0	0	0	0	0	0	0	0	0	0	0	0	0	0	0	0	0	300	0	0	0	0
ASV227	CCTATCTTCAATTATTGCACATACAGGATCATCTGTTGATTTCTCTATTTTTTCTCTTCATATTGCTGGTATTTCATCAATTTTAGGAGCAATTAACTTTATTTCAACCATATTTAATATAAAAATTAAATTTTTAAAATTTAATCAAATTTCTTTATTCACTTGATCAGTATTAATTACAGCAATTTTATTATTATTATCATTA	Arthropoda	Insecta	Diptera	Cecidomyiidae	Dactylasioptera	Dactylasioptera sp.	24489	0	0	0	0	0	0	0	0	0	0	0	0	0	0	0	0	0	0	0	0	0	0	0	0	0	0	0	0	0	0	0	0	0	0	0	0	0	0	0	0	0
ASV228	TTTATCAGCAAACGTATCCCACGCTGGGGCTTCAGTTGATTTAGCTATTTTTTCTTTGCATTTGGCCGGTATCTCTTCAATTTTAGGAGCAGTAAATTTTATTACTACTATTATTAATATGCGATCTAATGGAATTACTTTCGACCGAATACCTTTATTTGTATGATCAGTATTAATTACTGCCATTTTATTACTTTTATCTTTA	Arthropoda	Insecta	Diptera	Ceratopogonidae	Ceratopogonidae sp.	Ceratopogonidae sp. 1	73277	0	0	0	0	0	0	0	0	0	0	0	0	0	0	0	0	0	0	0	0	0	0	0	0	0	0	0	0	0	0	0	0	0	0	0	0	0	0	0	0	0
ASV229	TTTAGCGGCTAACGTTTCTCACGCAGGAGCCTCTGTTGATTTAGCAATTTTTTCTCTTCATTTAGCCGGGATTTCTTCTATTTTAGGGGCTGTAAATTTTATTACTACAATTATTAATATACGATCTACAGGTATTACATTTGATCGAATACCATTATTTGTTTGATCAGTATTTATTACAGCTATTTTACTTCTTCTTTCATTA	Arthropoda	Insecta	Diptera	Ceratopogonidae	Ceratopogonidae sp.	Ceratopogonidae sp. 2	14798	0	0	0	0	0	0	0	0	0	0	0	0	0	0	0	0	0	0	0	0	0	0	0	0	0	0	0	0	0	0	0	0	0	0	0	0	0	0	0	0	0
ASV230	TCTTTCAGCTAATATTGCACATGCAGGAGCATCTGTTGATCTAGCAATTTTTTCTCTTCATCTTGCAGGAATTTCTTCTATTTTAGGAGCAGTAAATTTTATTACAACTATTATTAATATACGATCAAATGGAATTACATTTGACCGAATACCCCTATTTGTCTGATCAGTTTTAATTACAGCAATTTTATTACTTCTATCTCTT	Arthropoda	Insecta	Diptera	Ceratopogonidae	Ceratopogonidae sp.	Ceratopogonidae sp. 3	1726	0	0	0	0	0	0	0	0	0	0	0	0	0	0	0	0	0	0	0	0	0	0	0	0	0	0	0	0	0	0	0	0	0	0	0	0	0	0	0	0	0
ASV231	CTTAGCAAATAACATTGCTCATAGAGGAGCCTCTGTAGATTTAGCTATTTTTTCCCTTCATTTAGCCGGTATCTCATCAATTTTAGGAGCAATAAATTTTATCACTACTATTATAAATATACGATCAAATGGAATATCTTTTGACCGAATGCCATTATTTGTTTGATCAGTATTAATTACAGCAATCCTATTACTTCTCTCTTTA	Arthropoda	Insecta	Diptera	Ceratopogonidae	Ceratopogonidae sp.	Ceratopogonidae sp. KY845027	408	0	0	0	0	0	0	0	0	0	0	0	0	0	0	0	0	0	0	0	0	0	0	0	0	0	0	0	0	0	0	0	0	0	0	0	0	0	0	0	0	0
ASV232	ATTAGCAGCTAACATTTCTCATGCAGGATCTTCTGTAGATTTAGCAATTTTTTCTTTACATTTAGCTGGTATTTCTTCAATTTTAGGAGCTGTAAATTTTATTACAACAATTATTAATATACGTTCAAATGGAATCACTTTTGACCGAATACCTTTATTTGTTTGATCAGTTTTAATTACTGCTGTATTATTACTTTTATCTTTA	Arthropoda	Insecta	Diptera	Ceratopogonidae	Ceratopogonidae sp.	Ceratopogonidae sp. nr KY844121.1	19587	0	0	0	0	0	0	0	0	0	0	0	0	0	0	0	0	0	0	0	0	0	0	0	0	0	0	0	0	0	0	0	0	0	0	0	0	0	0	0	0	0
ASV233	TTTATCGGCAAGTATTGCTCACAGAGGAGCTTCTGTTGATTTAGCTATTTTTTCTTTACATTTAGCTGGAATTTCCTCAATTTTAGGATCTGTAAATTTTATTACAACAGTAATTAATATACGATCAAACGGAATTACATTAGATCGAATACCTTTATTTGTATGATCAATTGTCATTACTACTGTATTATTATTACTATCTTTA	Arthropoda	Insecta	Diptera	Chironomidae	Chironomidae sp.	Chironomidae sp. 1	1162	0	0	0	13	1149	0	0	0	0	0	0	0	0	0	0	0	0	0	0	0	0	0	0	0	0	0	0	0	0	0	0	0	0	0	0	0	0	0	0	0	0
ASV234	TCTTTCTTCTTCAATTGCCCATAGTGGGGCATCAGTAGATTTAGCAATTTTTTCTTTACATTTAGCAGGAATTTCTTCAATTTTAGGGTCTGTAAATTTTATTACAACAGCAATTAATATACGAGCAAATGGAATTACTCTTGATCGAATACCTTTATTTGTTTGATCTGTTATTATTACTACTGTTCTTTTACTTCTTTCTTTG	Arthropoda	Insecta	Diptera	Chironomidae	Chironomidae sp.	Chironomidae sp. 2	233569	0	0	0	0	0	0	0	0	0	0	0	0	0	0	0	0	0	0	0	0	0	0	0	0	0	0	0	0	0	0	0	0	0	0	0	0	0	0	0	0	0
ASV235	ATTATCAGCAGCTATTGCTCATAGAGGGGCATCTGTTGATCTTGCTATTTTTTCACTTCATTTAGCAGGAGTATCATCTATTCTTGGATCAGTAAATTTTATTACTACAGTAATTAATATACGAGCAAATGGAATTACTCTTGATCGAATACCTTTATTTGTTTGATCTGTTGTAATTACAACAGTTCTTCTTCTTCTTTCTCTG	Arthropoda	Insecta	Diptera	Chironomidae	Chironomidae sp.	Chironomidae sp. 3	1152	0	0	0	13	1139	0	0	0	0	0	0	0	0	0	0	0	0	0	0	0	0	0	0	0	0	0	0	0	0	0	0	0	0	0	0	0	0	0	0	0	0
ASV236	TCTTTCATCAGGAATTGCCCATGCAGGAGGATCAGTAGATTTAGCTATTTTTTCTTTACATTTAGCAGGAATTTCTTCAATTTTAGGAGCAGTAAATTTTATTACAACTGTAATTAACATACGATCTGCAGGAATTACATTAGATCGAATACCATTATTTGTGTGATCAGTAGTAATTACTGCTATTCTTCTTCTTCTATCTTTA	Arthropoda	Insecta	Diptera	Chironomidae	Chironomidae sp.	Chironomidae sp. 4	263	0	0	0	0	0	0	0	0	0	0	0	0	0	0	0	0	0	0	0	0	0	0	0	0	0	0	0	0	0	0	0	0	0	0	0	0	0	0	0	0	0
ASV237	TTTCTTCAGCTATTGCCCACAGAGGAGCATCAGTTGATTTAGCTATTTTTTCTCTTCATTTAGCGGGAGTATCTTCAATTTTAGGTTCTGTAAATTTTATTACCACAGTAATTAATATACGAGCTAATGGAATTACTTTAGATCGAATACCTTTATTTGTATGATCTGTAGTAATTACAACAGTTTTACTTCTTTTATCTTTA	Arthropoda	Insecta	Diptera	Chironomidae	Chironomidae sp.	Chironomidae sp. 5	253	0	0	0	0	0	0	0	0	0	0	2	0	0	0	0	0	0	0	0	0	0	0	0	0	0	0	0	94	0	0	0	0	0	0	0	0	0	0	0	0	0
ASV238	TCTTTCTGCAGCTATTGCACATAGAGGAGCTTCAGTAGACTTAGCTATTTTTTCTTTACATTTAGCAGGTGTTTCTTCAATTCTAGGTTCTGTAAATTTTATTACAACAGTTATTAATATACGAGCAAATGGAATTACTTTAGATCGAATACCTTTATTTGTTTGATCTGTTGTTATTACAACAGTTCTTTTATTATTATCTCTC	Arthropoda	Insecta	Diptera	Chironomidae	Chironomus	Chironomus cloacalis	1745	0	0	0	0	0	0	0	0	0	0	0	0	0	0	0	0	0	0	0	0	0	0	0	0	0	0	0	0	0	0	0	0	0	0	0	0	0	0	0	0	0
ASV239	CTTATCTGCTGCCATTGCTCATAGTGGGGCTTCAGTCGACTTAGCAATTTTCTCATTACATTTAGCAGGTGTTTCTTCTATTCTCGGTTCAGTAAATTTTATTACTACAGTAATTAATATGCGAGCAAACGGAATTACTTTAGATCGAATACCTCTATTTGTTTGATCTGTAGTTATTACTACTGTTCTTCTCCTTCTGTCGCTT	Arthropoda	Insecta	Diptera	Chironomidae	Chironomus	Chironomus duplex	3863	0	12	8	21	8	11	4	0	6	0	0	0	44	288	33	14	0	162	0	0	5	137	154	0	0	0	64	2	29	15	86	11	373	142	114	4	0	0	0	0	0
ASV240	CTTATCTGCTGCCATTGCTCATAGTGGGGCTTCAGTCGACTTAGCAATTTTCTCATTACATTTAGCAGGTGTTTCTTCTATTCTCGGTTCAGTAAATTTTATTACTACAGTAATTAATATACGAGCTAATGGTATTACTCTTGATCGAATACCTTTATTTGTATGATCAGTTGTAATTACAACTGTTCTTCTTCTTTTATCTTTA	Arthropoda	Insecta	Diptera	Chironomidae	Chironomus	Chironomus sp. 1	42	0	0	0	0	0	0	0	0	0	0	1	0	0	0	7	0	0	34	0	0	0	0	0	0	0	0	0	0	0	0	0	0	0	0	0	0	0	0	0	0	0
ASV241	TCTTTCCGCAGCTATTGCTCATAGTGGGGCTTCAGTAGACTTAGCTATTTTTTCTCTTCATTTAGCAGGAGTATCTTCTATTCTTGGTTCAGTAAATTTTATTACTACAGTAATTAATATACGATCAAACGGGATTACATTAGATCGAATACCTTTATTTGTTTGATCTGTGGTTATTACTACTGTTCTTCTCCTTCTGTCGCTT	Arthropoda	Insecta	Diptera	Chironomidae	Chironomus	Chironomus sp. 2	39	0	0	0	0	0	0	0	0	0	0	0	0	0	0	0	0	0	0	0	0	0	0	0	0	0	0	11	28	0	0	0	0	0	0	0	0	0	0	0	0	0
ASV242	CTTATCTGCTGCTATTGCTCATAGTGGAGCTTCAGTCGACTTAGCAATTTTCTCATTACATTTAGCAGGTGTTTCTTCTATTCTCGGTTCAGTAAATTTTATTACTACAGTAATTAATATGCGATCAAGAGGGATTACCCTAGACCGAATACCATTATTTGTCTGATCTATTGTTATTACTACAGTTCTACTTCTTCTTTCATTA	Arthropoda	Insecta	Diptera	Chironomidae	Chironomus	Chironomus sp. 3	60	0	0	0	0	0	0	0	0	0	0	0	0	0	0	0	0	0	0	0	0	0	0	0	0	0	0	0	0	0	0	0	0	0	0	0	0	0	0	0	0	0
ASV243	TCTTTCCGCAGCTATTGCTCATAGTGGGGCTTCAGTAGACTTAGCTATTTTTTCTCTTCATTTAGCAGGAGTATCTTCTATTCTTGGTTCAGTAAATTTTATTACAACAGTAATTAATATACGATCAAACGGGATTACATTAGATCGAATACCTTTATTTGTTTGATCAGTAATTATTACTGCTATTTTATTACTATTATCTTTA	Arthropoda	Insecta	Diptera	Chironomidae	Chironomus	Chironomus sp. 4	23	0	0	0	0	0	0	0	0	0	0	0	0	0	0	0	0	0	0	0	0	0	0	23	0	0	0	0	0	0	0	0	0	0	0	0	0	0	0	0	0	0
ASV244	TCTTTCCGCAGCTATTGCTCATAGTGGGGCTTCAGTAGACTTAGCTATTTTTTCTCTTCATTTAGCAGGAGTATCTTCTATTCTTGGTTCAGTAAATTTTATTACTACAGTAATTAATATACGAGCTAATGGTATTACTCTTGATCGAATACCTTTATTTGTATGATCAGTTGTAATTACAACTGTTCTTCTTCTTTTATCTTTA	Arthropoda	Insecta	Diptera	Chironomidae	Chironomus	Chironomus tepperi	14706	93	153	18	6	2	14	50	60	27	4	8	7	30	100	19	10	4	18	3	0	7	265	344	0	0	0	55	357	22	0	49	4	441	139	67	0	0	0	0	0	0
ASV245	TTTATCTTCTGCAATTGCCCACAGAGGGGCTTCTGTTGATTTAGCTATTTTCTCTTTACATTTAGCAGGGGTTTCTTCAATTTTAGGTTCTGTAAATTTTATTACAACAGTAATTAATATACGAGCTAATGGAATTACTTTAGACCGAATACCTCTATTTGTATGATCAGTTGTAATTACAACTGTTTTATTACTCCTTTCACTT	Arthropoda	Insecta	Diptera	Chironomidae	Cladopelma	Cladopelma sp. nr KJ946684.1	12648	0	0	0	0	0	0	0	0	0	0	0	0	0	0	0	0	0	0	0	0	0	0	0	0	0	0	0	0	0	0	0	0	0	0	11	0	2	0	0	0	0
ASV247	CTTATCATCTAATATTGCCCATAGAGGTGCCTCTGTAGATCTAGCAATTTTTTCTCTTCATTTAGCAGGGATTTCATCTATTTTAGGTTCAGTAAACTTTATTACTACTGCAATTAATATACGAAGAAACGGAATTTCTTTAGACCGAATACCTTTATTCGTATGATCTGTAGTTATTACAACAATTTTATTATTATTATCTTTA	Arthropoda	Insecta	Diptera	Chironomidae	Cladotanytarsus	Cladotanytarsus bilinearis	41511	0	0	0	0	0	0	0	0	0	0	0	0	0	0	0	0	0	0	0	0	0	0	0	0	0	0	0	0	0	0	0	0	0	0	0	0	0	0	0	0	0
ASV248	TCTTTCTTCTAATATTGCTCATAGAGGAGCTTCTGTTGATTTAGCAATTTTTTCTTTACATCTAGCTGGAATTTCATCAATTTTAGGTTCTGTAAATTTTATTACAACAGCTATTAATATACGAAGAAATGGGATTTCTTTAGATCGAATACCATTATTTGTCTGATCAGTTGTAATTACAACTATTTTACTTTTATTATCTTTA	Arthropoda	Insecta	Diptera	Chironomidae	Cladotanytarsus	Cladotanytarsus sp. DQ393877.1	70460	856	1198	0	0	0	0	0	0	0	0	0	0	82	740	0	0	0	0	0	0	0	0	0	0	0	0	0	0	0	0	0	0	0	0	0	0	0	0	5207	4388	0
ASV249	ATTATCTTCAGGTATTGCTCACGCAGGTGCATCAGTAGATTTAGCTATTTTTTCTTTACATTTAGCTGGGATTTCTTCTATTTTAGGAGCTGTAAATTTTATTACCACAGTAATTAATATACGATCAGAAGGAATCACATTAGATCGTATACCTTTATTTGTCTGATCTGTAATTATTACAGCTGTACTTTTATTATTATCTTTA	Arthropoda	Insecta	Diptera	Chironomidae	Cricotopus	Cricotopus albitarsis	52956	0	0	0	0	0	0	0	0	0	0	0	0	0	0	0	0	0	0	0	0	0	0	0	0	0	0	0	185	0	0	0	0	0	0	0	0	0	0	0	0	0
ASV250	ATTATCTTCAGCTATTGCCCACAGAGGGGCTTCTGTTGATCTAGCTATTTTTTCCCTCCATCTTGCGGGAGTTTCTTCAATTTTAGGATCAGTAAATTTCATTACTACTGTAATTAATATACGAGCTAATGGAATTACTCTAGACCGAATACCGTTATTTGTGTGATCAGTAGTAATTACTACAGTTCTTCTTTTACTATCACTT	Arthropoda	Insecta	Diptera	Chironomidae	Cryptochironomus	Cryptochironomus sp. KJ946732.1	132422	0	0	0	0	0	0	0	0	0	0	0	0	0	0	0	0	0	0	0	0	0	0	0	0	0	0	0	0	0	0	0	0	0	0	0	0	55984	47	0	0	3
ASV251	TCTTTCATCTAGAATTGCTCATAGAGGGAGCTCAGTTGATTTAGCTATTTTTTCTCTTCATTTAGCGGGAATCTCTTCTATTTTGGGGGCAGTAAATTTTATTACAACAATTATTAATATACGGTCAAATGGAATTACTTTTGACCGAATACCATTATTCGTATGATCAGTTTTTATTACAGCAATCCTTTTATTACTTTCTTTA	Arthropoda	Insecta	Diptera	Chironomidae	Orthocladiinae sp.	Orthocladiinae sp. KY830088.1	1227	0	0	0	0	0	0	0	0	0	0	0	0	0	0	0	0	0	0	0	0	0	0	0	0	0	0	0	0	0	0	0	0	0	0	0	0	0	0	0	0	0
ASV252	TCTTTCATCTAGAATTGCTCATGCAGGCAGATCAGTAGATTTGGCAATTTTTTCCCTTCATTTAGCAGGAATTTCCTCTATTTTAGGAGCAGTAAATTTCATTACTACTGTAATTAATATACGCTCAGAAGGAATTACATTTGATCGAATACCCTTATTCGTGTGATCTGTATTAATCACTGCCATTCTTCTCCTATTATCTTTG	Arthropoda	Insecta	Diptera	Chironomidae	Orthocladiinae sp.	Orthocladiinae sp. MG305954.1	7883	0	0	0	0	0	0	0	0	0	0	0	0	0	0	0	0	0	0	0	0	0	0	0	0	0	0	0	0	0	0	6	0	0	0	0	0	0	0	0	0	0
ASV253	ACTATCTTCAAGAATTGCTCATAGAGGTGCTTCTGTTGATTTAGCGATTTTTTCTCTTCATTTAGCAGGAATTTCTTCAATTTTAGGTTCAGTAAATTTTATTACTACAGCAATTAATATACGATCTAATGGTATTACACTAGATCGAATACCTTTATTTGTATGATCAGTAGTAATTACAACTGTCCTTCTTTTATTATCTTTA	Arthropoda	Insecta	Diptera	Chironomidae	Paratanytarsus	Paratanytarsus kathleenae	29670	0	0	0	0	0	0	0	0	0	0	0	0	0	0	0	0	0	0	0	0	0	0	0	0	0	0	0	0	0	0	0	0	0	0	0	0	0	0	0	0	0
ASV254	CCTTTCTTCAGGTATTGCTCATGCAGGAGCCTCAGTTGACTTAGCTATTTTTTCTTTACATTTAGCTGGAATTTCTTCTATCTTAGGAGCTGTAAATTTTATTACTACTGTTATTAATATACGTTCAGAAGGAATCACCTTAGACCGAATGCCTTTATTTGTTTGGTCTGTTGTAATTACTGCTGTTTTATTACTACTATCTTTG	Arthropoda	Insecta	Diptera	Chironomidae	Paratrichocladius	Paratrichocladius australiensis	1691	0	0	0	0	0	0	0	0	0	0	0	0	0	0	0	0	0	0	0	0	0	0	0	0	0	0	0	0	0	0	0	0	0	0	0	0	0	0	0	0	0
ASV255	TTTATCAGCAAGAATTGCACATAGAGGAGCCTCAGTAGATCTTGCTATTTTCTCTCTTCATCTCGCAGGAGTTTCATCCATTCTAGGATCAGTAAATTTTATTACAACAGTAATTAATATGCGATCAAGAGGGATTACCCTAGACCGAATACCATTATTTGTCTGATCTATTGTTATTACTACAGTTCTACTTCTTCTTTCATTA	Arthropoda	Insecta	Diptera	Chironomidae	Polypedilum	Polypedilum nubifer	97201	0	6	3	9	0	18	0	0	16	0	0	2	54	187	13	54	65	0	3	12	0	183	552	0	0	0	147	731	24219	42	325	3	427	84	26	14	2	0	1	0	6
ASV256	TCTTTCAGCCAGCATTGCTCATAGTGGAGCCTCTGTAGATTTAGCAATTTTTTCTCTTCACTTAGCCGGAGTATCCTCAATTTTAGGTTCAGTAAATTTTATTACTACTGTAATTAATATACGATCAAAAGGTATTACTCTAGATCGAATACCTTTATTTGTTTGATCAATTGTAATTACTACAGTTCTATTACTTCTTTCTCTC	Arthropoda	Insecta	Diptera	Chironomidae	Polypedilum	Polypedilum sp. KC750509.1	49004	0	0	0	0	0	0	0	0	0	0	0	0	0	0	0	0	0	0	0	0	0	0	0	0	0	0	0	0	0	0	0	0	0	0	0	0	2727	0	0	0	0
ASV257	TTTAGCTTCTGGAATTGCACATGCTGGAGCCTCAGTTGATTTAGCTATTTTTTCATTACATTTAGCCGGTGTCTCATCAATTTTAGGTGCAGTAAATTTTATTACAACAGTAATTAATATACGATCAAACGGAATTACATTAGATCGAATACCTTTATTTGTTTGATCAGTAATTATTACCGCTATTTTATTACTATTATCTTTA	Arthropoda	Insecta	Diptera	Chironomidae	Procladius	Procladius paludicola	351946	3	6	10	102	8581	10	3	18	17	3	16	5	26	337	71	3	24	123	0	5	17	124	296	0	0	0	62	136	52	20	152	8	412	55	39	1	19712	14	0	0	5
ASV259	TCTTTCTGCTGCAATTGCTCATAGAGGGGCATCAGTAGACTTAGCAATTTTTTCTCTTCATTTAGCTGGAGTTTCATCAATTTTGGGTTCTGTAAATTTTATTACTACAGTTATTAATATACGAACAAATGGAATTACTTTAGATCGAATACCATTATTTGTATGATCAGTAGTTATTACAACAGTTCTTCTTTTACTCTCATTA	Arthropoda	Insecta	Diptera	Chironomidae	Riethia	Riethia stictoptera	32	0	0	0	0	0	0	0	0	0	0	0	0	0	0	0	0	0	0	0	0	0	0	0	0	0	0	0	0	0	0	0	0	0	0	0	0	0	0	0	0	0
ASV260	TTTATCAGCAAGAATTGCCCATAGAGGAGCCTCTGTTGATTTAGCTATTTTTTCCCTCCATTTAGCAGGAGTTTCATCTATTTTAGGATCCGTAAATTTTATTACCACAGCCATTAATATACGATCAAACGGAATTACTTTAGACCGAATACCTTTATTTGTATGATCCGTTATTATCACAACAATTTTATTACTTTTATCATTA	Arthropoda	Insecta	Diptera	Chironomidae	Tanytarsus	Tanytarsus barbitarsis	22821	0	0	0	0	0	0	0	0	22795	2	0	0	0	0	0	0	0	0	0	0	0	0	0	0	0	0	19	0	0	0	0	0	0	0	0	0	0	0	0	0	0
ASV261	TTTATCAGCTAGAATTGCCCATAGAGGAAGTTCAGTAGATTTAGCAATTTTTTCACTTCATTTAGCAGGGATTTCATCAATTTTAGGTTCTGTAAATTTTATTACAACAGCAATTAATATACGATCTAATGGAATTACTTTAGATCGAATACCTTTATTTGTTTGATCTGTAATTATTACAACAATTCTTCTTCTTCTTTCACTT	Arthropoda	Insecta	Diptera	Chironomidae	Tanytarsus	Tanytarsus bispinosus	385834	0	0	0	0	0	0	0	0	0	0	0	0	0	0	0	0	0	0	0	0	0	0	0	0	0	0	24479	0	0	0	0	0	0	0	0	0	0	0	0	0	0
ASV263	TTTATCATCCAGAATTGCTCATAGAGGAGCTTCTGTAGACCTAGCCATTTTTTCTCTTCATTTAGCTGGAGTCTCTTCAATCTTAGGATCAGTAAATTTTATTACTACAGCTATTAACATACGATCAAACGGAATTACCCTTGATCGAATACCTTTATTTGTCTGATCTGTTGTAATTACAACAATTTTATTGTTACTTTCACTT	Arthropoda	Insecta	Diptera	Chironomidae	Tanytarsus	Tanytarsus fuscithorax	677861	0	0	6	10	3	12	9	8	5	3	1	21	48	166	32	26	4	25	3	5	10	69	127	2	0	0	59018	413	54	12	26	0	133	99	32	13	3	0	0	1	8209
ASV264	TCTTTCTGCAAGCATTGCTCATAGAGGGGCTTCAGTTGATTTAGCAATTTTTTCACTTCATCTTGCTGGAATTTCTTCTATTTTAGGTTCAGTAAATTTTATTACTACAGCAATTAATATACGATCAAATGGAATTACTTTAGATCGAATACCTTTATTTGTTTGATCTGTTATTATTACTACAATTTTATTACTTTTATCTTTA	Arthropoda	Insecta	Diptera	Chironomidae	Tanytarsus	Tanytarsus inextentus	111	0	0	0	0	0	0	0	0	0	0	0	0	0	0	0	0	0	0	0	0	0	0	0	0	0	0	0	0	0	0	0	0	0	0	0	0	0	0	0	0	0
ASV265	TTTATCATCTAGAATTGCTCATAGAGGAGCCTCTGTTGATTTAGCTATTTTTTCTTTACATTTAGCAGGTATTTCCTCAATTTTAGGATCAGTAAATTTTATTACAACAGCTATTAATATACGATCTAATGGGATTACTTTAGATCGAATACCATTATTTGTTTGATCCGTTATCATTACAACCATTTTACTTTTACTTTCTTTA	Arthropoda	Insecta	Diptera	Chironomidae	Tanytarsus	Tanytarsus semibarbitarsus	6772	0	0	0	0	0	0	0	0	0	0	0	0	0	0	0	0	0	0	0	0	0	0	0	0	0	0	0	0	0	0	0	0	0	0	0	0	0	0	0	0	0
ASV268	TTTATCTTCTATTATTGCTCATGGGGGAGCATCAGTTGATTTAGCTATTTTTTCTTTACATTTAGCAGGAGTTTCTTCAATTTTAGGAGCTGTAAATTTTATTACAACAGTAATTAACATACGATCAGTTGGAATTACATTTGATCGAATACCTTTATTTGTATGATCAGTAGTAATTACAGCATTACTTTTATTACTTTCTTTA	Arthropoda	Insecta	Diptera	Chloropidae	Chloropidae sp.	Chloropidae sp. 01	22689	0	0	0	0	0	0	0	0	0	0	0	0	0	0	0	0	0	0	0	0	0	0	0	0	0	0	0	0	0	0	0	0	17162	0	0	0	0	0	0	0	0
ASV269	ATTATCTTCAATTATCGCTCATGGAGGAGCTTCTGTTGATTTAGCAATTTTTTCACTTCATTTAGCAGGAGTATCATCTATTTTAGGAGCTGTAAATTTTATTACAACTGTAATTAATATACGAGCTACTGGAATTACTTTTGATCGAATACCATTATTTGTTTGATCAGTAGTAATTACTGCTTTATTATTATTATTATCATTG	Arthropoda	Insecta	Diptera	Chloropidae	Chloropidae sp.	Chloropidae sp. 02	364098	728	1058	4809	0	0	0	3567	4270	0	0	0	0	0	0	0	0	0	0	0	0	0	0	0	0	0	0	0	0	29	0	0	0	36226	0	4	0	0	0	5126	5831	39334
ASV270	GTTATCATCAATTATTGCTCATGGAGGAGCTTCAGTTGATTTAGCTATTTTCTCTCTTCATTTAGCCGGAGTATCATCAATTTTAGGAGCAGTAAATTTTATTACAACAGTAATTAATATACGATCTACAGGAATTACATTTGACCGAATACCTTTATTTGTTTGATCAGTTGTAATTACTGCTTTACTTTTATTATTATCTTTA	Arthropoda	Insecta	Diptera	Chloropidae	Chloropidae sp.	Chloropidae sp. 03	131833	0	0	0	0	0	0	0	0	0	0	0	0	0	0	0	0	0	0	0	0	0	0	0	0	0	0	0	0	0	0	0	0	0	0	74	0	1	0	0	0	3846
ASV271	GTTATCATCAATTATTGCTCATGGAGGAGCTTCAGTTGATTTAGCAATTTTTTCATTACATCTAGCTGGAGTATCTTCAATTTTAGGAGCAGTAAATTTTATTACTACAGTAATTAATATACGATCTACTGGAATTACATTTGATCGAATACCATTATTCGTATGATCAGTAGTAATTACTGCTTTATTATTATTATTATCTTTA	Arthropoda	Insecta	Diptera	Chloropidae	Chloropidae sp.	Chloropidae sp. 04	43058	0	0	0	0	0	0	0	0	0	0	0	0	0	0	0	0	0	0	0	0	0	0	0	0	0	0	0	0	0	0	0	0	0	0	0	0	0	0	0	0	0
ASV272	TTTATCATCAATTATTGCTCATGGAGGAGCTTCAGTTGATTTAGCAATTTTTTCATTACATTTAGCTGGAGTTTCATCAATTCTAGGAGCTGTAAATTTTATTACAACTGTAATTAATATACGTGCTACTGGAATTACTTTTGACCGAATACCATTATTTGTTTGATCAGTAGTAATTACAGCTTTATTATTACTTTTATCATTA	Arthropoda	Insecta	Diptera	Chloropidae	Chloropidae sp.	Chloropidae sp. 05	23983	0	0	0	0	0	0	0	0	0	0	0	0	0	0	0	0	0	0	0	0	0	0	0	0	0	0	0	0	0	421	17944	0	5070	0	0	0	0	0	0	0	0
ASV273	TTTATCTTCAATTATTGCCCATGGAGGAGCCTCAGTTGATTTAGCAATTTTTTCATTACATTTAGCTGGGGTTTCTTCAATTTTAGGAGCTGTAAATTTTATTACTACAGTAATTAATATACGATCAACAGGAATTACATTTGATCGAATACCATTATTTGTTTGATCAGTAGTGATTACTGCTTTATTGTTATTATTATCTTTA	Arthropoda	Insecta	Diptera	Chloropidae	Chloropidae sp.	Chloropidae sp. 06	6566	0	0	0	0	0	0	0	0	0	0	0	0	0	0	0	0	0	0	0	0	0	0	0	0	0	0	0	0	0	0	0	0	0	0	0	0	0	0	0	0	0
ASV274	TCTTTCATCTATTATTGCTCATGGAGGAGCTTCTGTTGATTTAGCAATTTTTTCTTTACATTTAGCAGGAGTATCATCAATTTTAGGAGCAGTAAATTTTATTACAACAGTAATTAATATACGATCAACAGGAATTACTTTTGATCGAATGCCTTTATTTGTTTGATCAGTTGTAATTACTGCCTTATTATTATTATTATCTTTA	Arthropoda	Insecta	Diptera	Chloropidae	Chloropidae sp.	Chloropidae sp. 07	5295	0	0	0	0	0	0	1532	1891	0	0	0	0	0	0	0	0	0	0	0	0	0	0	0	0	0	0	0	0	0	0	0	0	0	0	0	0	0	0	0	0	0
ASV275	CTTATCATCAATTATTGCTCATGGTGGAGCTTCTGTTGATTTAGCTATTTTTTCATTACATTTAGCAGGAGTATCCTCAATTTTAGGAGCAGTAAATTTTATTACAACAGTAATTAATATGCGATCTACAGGAATTACATTTGATCGAATACCATTATTTGTCTGATCAGTAGTAATTACAGCTTTATTATTATTATTATCATTG	Arthropoda	Insecta	Diptera	Chloropidae	Chloropidae sp.	Chloropidae sp. 08	6246	0	0	0	0	0	0	0	0	0	0	0	0	0	0	0	0	0	0	0	0	0	0	0	0	0	0	0	0	0	0	0	0	0	0	0	0	0	0	0	0	0
ASV276	TCTATCTTCAATTATTGCCCATGGAGGAGCTTCAGTTGATTTAGCTATTTTTTCTTTACACTTAGCAGGAGTTTCTTCAATTTTAGGAGCCGTAAATTTTATTACAACAGTAATTAATATACGATCTACAGGAATTACTTTTGATCGAATACCATTATTTGTATGATCAGTAGTAATTACTGCTCTACTTCTATTATTATCATTA	Arthropoda	Insecta	Diptera	Chloropidae	Chloropidae sp.	Chloropidae sp. 09	1408	0	0	0	0	0	0	0	0	0	0	0	0	0	0	0	0	0	0	0	0	0	0	0	0	0	0	0	0	0	0	0	0	0	0	0	0	0	0	0	0	0
ASV277	ATTATCATCTATTATTGCTCATGGTGGAGCTTCTGTTGATTTAGCTATTTTTTCATTACATTTAGCAGGAGTATCTTCAATTTTAGGGGCTGTAAATTTTATTACAACAGTAATTAATATACGATCAACAGGAATTACATTTGATCGAATACCATTATTTGTGTGATCAGTAGTAATTACAGCTTTATTATTATTATTATCATTA	Arthropoda	Insecta	Diptera	Chloropidae	Chloropidae sp.	Chloropidae sp. 10	713	0	0	0	0	0	0	0	0	0	0	0	0	0	0	0	0	0	0	0	0	0	0	0	0	0	0	0	0	0	0	0	0	0	0	0	0	0	0	0	0	0
ASV278	TTTATCATCAATTATTGCTCATGGAGGAGCTTCTGTTGATTTAGCTATTTTTTCTCTTCATTTAGCAGGAGTTTCTTCAATTTTAGGAGCTGTAAATTTTATTACTACAGTAATTAATATACGATCTGTAGGAATTACATTTGATCGAATACCATTATTTGTTTGATCTGTAGTAATTACAGCTTTATTACTTCTTCTTTCATTA	Arthropoda	Insecta	Diptera	Chloropidae	Chloropidae sp.	Chloropidae sp. 11	361	0	0	0	0	0	0	0	0	0	0	0	0	0	0	0	0	0	0	0	0	0	0	0	0	0	0	0	0	0	0	0	0	361	0	0	0	0	0	0	0	0
ASV279	ATTATCATCTATTATTGCTCATGGTGGAGCTTCTGTTGATTTAGCTATTTTTTCATTACATTTAGCAGGAGTATCTTCAATTTTAGGAGCTGTAAATTTTATTACAACAGTAATTAATATACGATCAACAGGAATTACATTTGATCGAATACCATTATTTGTCTGATCAGTAGTAATTACAGCTTTATTATTATTATTATCATTG	Arthropoda	Insecta	Diptera	Chloropidae	Chloropidae sp.	Chloropidae sp. 12	544	0	0	0	0	0	0	0	0	0	0	0	0	0	0	0	0	0	0	0	0	0	0	0	0	0	0	0	0	0	0	0	0	0	0	0	0	0	0	0	0	0
ASV280	GCTTTCATCAATCATTGCCCACGGAGGGGCCTCTGTTGATTTAGCAATTTTTTCACTTCACTTAGCCGGGGTATCTTCTATTTTAGGGGCAGTTAATTTTATTACAACAGTTATTAATATACGATCAACAGGAATTACTTTTGACCGAATGCCCCTATTTGTATGATCTGTTGTAATTACTGCTTTATTACTTCTTTTATCATTG	Arthropoda	Insecta	Diptera	Chloropidae	Chloropidae sp.	Chloropidae sp. 13	214	0	0	0	0	0	0	0	0	0	0	0	0	0	0	0	0	0	0	0	0	0	0	0	0	0	0	0	0	0	0	0	0	0	0	0	0	0	0	0	0	0
ASV281	CCTATCATCTATTATTGCTCATGGTGGAGCTTCTGTTGATTTAGCTATTTTTTCATTGCATTTAGCAGGAGTATCTTCAATTTTAGGAGCTGTAAATTTTATTACAACAGTAATTAATATACGATCTACAGGAATTACATTTGATCGAATACCATTATTTGTTTGATCTGCAGTAATTACAGCTTTATTATTATTACTATCATTG	Arthropoda	Insecta	Diptera	Chloropidae	Chloropidae sp.	Chloropidae sp. 14	208	0	0	0	0	0	0	0	0	0	0	0	0	0	0	0	0	0	0	0	0	0	0	0	0	0	0	0	0	0	0	0	0	0	0	0	0	0	0	0	0	0
ASV282	GTTATCTTCAATTATTGCTCATGGAGGAGCTTCAGTTGATTTAGCAATTTTCTCACTTCATTTAGCTGGAGTATCATCAATTTTAGGAGCTGTAAATTTTATTACAACTGTAATTAATATACGAGCAACAGGAATTACCTTTGATCGAATGCCATTATTTGTTTGATCAGTAGTAATTACTGCATTATTATTATTATTATCATTA	Arthropoda	Insecta	Diptera	Chloropidae	Chloropidae sp.	Chloropidae sp. 15	195	0	0	0	0	0	0	0	0	0	0	0	0	0	0	0	0	0	0	0	0	0	0	0	0	0	0	0	0	0	0	0	0	0	0	0	0	0	0	0	0	0
ASV283	GCTATCATCAATTATTGCTCATGGTGGAGCATCAGTTGATTTAGCTATTTTTTCATTACATTTAGCGGGGGTTTCATCAATTTTAGGTGCAGTAAATTTTATTACAACTGTAATTAATATACGATCAACAGGAATTACATTTGACCGAATACCTTTATTTGTGTGATCAGTAGTAATTACTGCTTTATTACTTTTATTATCATTA	Arthropoda	Insecta	Diptera	Chloropidae	Chloropidae sp.	Chloropidae sp. 16	123	0	0	0	0	0	0	0	0	0	0	0	0	0	0	0	0	0	0	0	0	0	0	0	0	0	0	0	0	0	0	0	0	0	0	0	0	0	0	0	0	0
ASV284	ACTATCATCAATTATTGCTCACGGAGGAGCTTCTGTTGATTTAGCAATTTTTTCATTACATTTAGCAGGAGTATCATCTATTTTAGGGGCAGTAAATTTCATTACAACAGTTATTAATATACGATCAACAGGAATTACATTTGACCGAATACCTTTATTTGTCTGATCAGTCGTAATTACTGCTCTACTTTTATTATTATCATTA	Arthropoda	Insecta	Diptera	Chloropidae	Chloropidae sp.	Chloropidae sp. 17	115	0	0	0	0	0	0	0	0	0	0	0	0	0	0	0	0	0	0	0	0	0	0	0	0	0	0	0	0	0	0	0	0	0	0	0	0	0	0	0	0	0
ASV286	TTTATCTTCAATTATTGCTCATGGAGGAGCTTCAGTTGATTTAGCAATTTTTTCATTACATTTAGCAGGAGTTTCTTCAATTTTAGGAGCTGTAAATTTTATTACTACAGTAATTAATATACGATCAACAGGAATTACATTTGATCGAATACCATTATTTGTTTGATCAGTAGTAATTACTGCTTTATTATTATTATTATCTTTA	Arthropoda	Insecta	Diptera	Chloropidae	Chloropidae sp.	Chloropidae sp. nr HM417607.1	3057	0	0	0	0	0	0	0	0	0	0	0	0	0	0	0	0	0	0	0	0	0	0	0	0	0	0	0	0	0	0	0	0	0	0	0	0	0	0	0	0	0
ASV287	ACTTTCTTCTATTATTGCTCACGGAGGAGCTTCAGTTGATTTAGCAATTTTTTCATTACATTTAGCTGGAGTATCGTCAATTTTAGGAGCTGTAAATTTTATTACTACAGTAATTAATATACGATCTACAGGAATCACATTTGATCGAATACCATTATTTGTTTGATCAGTAGTAATTACAGCTTTATTATTACTTCTTTCTTTA	Arthropoda	Insecta	Diptera	Chloropidae	Chloropidae sp.	Chloropidae sp. nr KY831280.1	156	0	0	0	0	0	0	0	0	0	0	3	0	0	0	0	0	0	0	0	2	0	0	18	0	0	0	0	0	0	0	21	0	56	0	0	0	0	0	0	0	0
ASV288	GTTATCATCTATTATCGCTCATGGAGGTGCTTCTGTTGATTTAGCAATTTTTTCCCTTCATTTAGCAGGAGTATCATCAATTTTAGGAGCAGTAAATTTTATTACTACAGTAATTAATATACGATCAACAGGAATTACATTTGATCGAATACCATTATTTGTTTGATCAGTAGTAATTACAGCTTTATTATTATTATTATCATTA	Arthropoda	Insecta	Diptera	Chloropidae	Chloropidae sp.	Chloropidae sp. nr KY836117.1	2450	0	0	0	0	0	0	0	0	0	0	0	0	0	0	0	0	0	0	0	0	0	0	0	0	0	0	0	0	0	0	0	0	0	0	0	0	0	0	0	0	0
ASV289	TTTATCCTCAATTATTGCTCATGGAGGAGCTTCAGTTGATTTAGCTATTTTTTCATTACATTTAGCTGGAGTTTCTTCAATTTTAGGAGCAGTAAATTTTATTACAACTGTAATTAATATACGATCAACAGGAATTACATTTGATCGAATACCTTTATTTGTATGATCAGTAGTAATTACTGCTCTTCTATTATTATTATCATTA	Arthropoda	Insecta	Diptera	Chloropidae	Conioscinella	Conioscinella nr triorbiculata	1179	0	0	0	0	0	0	0	0	0	0	0	0	0	0	0	0	0	0	0	0	0	0	0	0	0	0	0	0	0	0	0	0	0	0	0	0	0	0	0	0	0
ASV290	CCTTTCATCAATTATTGCTCATGGAGGAGCTTCAGTTGATTTAGCTATTTTTTCATTACATTTAGCTGGAGTATCTTCTATTTTAGGAGCAGTAAATTTTATTACTACAGTAATTAATATACGATCAGCAGGTATTACCTTTGATCGAATACCCTTATTTGTTTGATCAGTAGTAATTACTGCTTTATTATTACTTTTATCTCTT	Arthropoda	Insecta	Diptera	Chloropidae	Conioscinella	Conioscinella sp. nr JF871784.1	1409	0	0	0	24	1045	0	0	0	0	0	0	0	0	0	0	0	0	0	0	0	0	0	0	0	0	0	0	65	0	0	0	0	6	0	0	0	0	0	0	0	0
ASV291	ACTTTCCTCAATTATTGCTCATGGAGGAGCTTCAGTTGATTTGGCAATTTTTTCTCTCCACTTAGCAGGAGTCTCTTCAATTTTAGGAGCAGTAAATTTTATTACCACAGTAATTAATATACGAGCTACAGGAATTACATTTGATCGAATACCTTTATTTGTATGATCGGTAGTAATTACTGCTTTATTACTTTTATTATCATTA	Arthropoda	Insecta	Diptera	Chloropidae	Gaurax	Gaurax sp. 1	23850	0	0	0	0	82	0	0	0	0	0	0	0	0	0	0	0	0	0	0	0	0	0	0	0	0	0	0	0	0	0	0	0	0	0	0	0	0	0	0	0	0
ASV292	ATTATCTTCAATTATTGCTCATGGAGGAGCTTCTGTTGATTTAGCTATTTTTTCATTACATTTAGCAGGAGTATCATCAATTTTAGGAGCTGTAAATTTTATTACAACTGTTATTAATATACGAGCAACTGGAATTACTTTTGATCGAATACCATTATTTGTATGATCAGTAGTAATTACTGCTTTATTATTACTTTTATCATTA	Arthropoda	Insecta	Diptera	Chloropidae	Hapleginella	Hapleginella sp. 1	722834	4917	6668	28800	68	4127	0	16396	19096	8390	1	2555	2	1718	9913	0	0	0	0	0	0	0	0	0	0	0	0	107	0	145	0	0	0	0	0	0	0	12362	0	4961	6189	7607
ASV293	TTTATCATCAATTATTGCTCATGGAGGAGCTTCAGTTGATTTAGCTATTTTTTCTCTTCATTTAGCTGGAGTTTCATCAATTTTAGGAGCTGTAAATTTTATTACTACAGTAATTAATATACGATCAACAGGAATTACATTTGATCGAATACCATTATTTGTTTGATCAGTTGTAATTACTGCTTTATTATTATTACTATCTTTA	Arthropoda	Insecta	Diptera	Chloropidae	Olcella	Olcella nr parva	9091	0	0	0	0	0	0	0	0	0	0	0	0	0	0	0	0	0	0	0	0	0	0	0	0	0	0	0	0	0	0	0	0	0	0	0	0	1	0	0	0	0
ASV294	TTTATCTTCAATTATTGCTCACGGAGGAGCTTCAGTTGATTTAGCAATTTTTTCACTTCATTTAGCCGGAGTCTCATCAATTTTAGGAGCTGTAAATTTTATTACAACTGTAATTAATATACGAGCAACAGGGATTACTTTCGATCGAATACCATTATTTGTGTGATCAGTAGTAATTACTGCTTTATTATTATTATTATCCCTA	Arthropoda	Insecta	Diptera	Chloropidae	Olcella	Olcella sp. 1	56273	216	307	0	0	0	0	0	0	0	0	854	0	0	0	0	0	0	0	0	0	0	0	0	0	0	0	0	0	0	0	0	0	0	0	0	0	0	0	0	0	2372
ASV295	ATTATCATCTATTATCGCTCATGGTGGAGCTTCTGTTGATTTAGCTATTTTTTCATTACATTTAGCGGGGGTATCTTCAATTTTAGGGGCTGTAAATTTTATTACAACAGTAATTAATATACGATCAACAGGAATTACATTTGATCGAATGCCATTATTTGTTTGATCAGTAGTAATTACAGCTTTATTATTATTATTATCATTA	Arthropoda	Insecta	Diptera	Chloropidae	Olcella	Olcella sp. 2	13039	0	0	0	0	0	0	0	0	0	0	0	0	0	0	0	0	0	0	0	0	0	0	0	0	0	0	0	0	0	0	0	0	0	0	0	0	0	0	0	0	0
ASV296	GTTATCATCAATTATTGCTCATGGAGGTGCTTCAGTTGATTTAGCTATTTTTTCTCTTCATTTAGCTGGAGTTTCTTCAATTTTAGGAGCAGTAAATTTTATTACAACAGTAATTAATATACGATCAACAGGTATTACATTTGACCGAATACCTTTATTTGTATGATCAGTTGTAATTACTGCTCTTCTTTTATTACTTTCTTTA	Arthropoda	Insecta	Diptera	Chloropidae	Olcella	Olcella sp. 3	834400	0	0	0	0	0	0	0	0	0	0	0	0	0	0	0	0	0	0	0	0	0	0	0	0	0	0	0	0	0	17	903	0	3537	0	6046	4057	0	0	0	0	0
ASV297	ACTATCATCTATTATTGCTCATGGAGGAGCTTCAGTTGATTTGGCAATTTTTTCATTACATTTAGCTGGAATTTCATCAATTTTAGGAGCGGTAAATTTTATTACAACAGTTATTAATATACGATCTACAGGAATTACATTTGATCGAATACCATTATTTGTTTGATCAGTAGTAATTACTGCTTTATTATTATTATTATCATTA	Arthropoda	Insecta	Diptera	Chloropidae	Olcella	Olcella sp. nr JF871961.1	59764	287	440	0	60	4626	0	2	0	0	0	0	0	0	0	0	0	0	0	0	0	0	0	0	0	0	0	0	0	0	6	0	0	0	0	0	0	14083	13	0	0	0
ASV299	ATTATCATCAATTATTGCTCACGGAGGAGCTTCAGTTGATTTAGCTATTTTTTCTCTTCATTTAGCTGGAGTTTCATCTATTTTAGGAGCTGTAAATTTTATTACAACAGTAATTAATATACGATCAACAGGAATTACATTTGACCGAATACCTTTATTTGTGTGATCAGTTGTAATTACTGCTCTTCTTTTATTACTTTCTTTA	Arthropoda	Insecta	Diptera	Chloropidae	Oscinella	Oscinella sp.	9280	0	0	0	0	0	0	0	0	0	0	0	0	0	0	0	0	0	0	0	0	0	0	0	0	0	0	0	0	19	106	4837	0	0	0	0	0	0	0	0	0	0
ASV300	TTTATCTTCAATTATTGCTCATGGAGGAGCTTCAGTTGATTTAGCAATTTTTTCACTTCATTTAGCCGGAGTTTCTTCAATTTTAGGAGCTGTAAATTTTATTACAACTGTAATTAATATACGAGCAACAGGAATTACTTTTGATCGAATACCATTATTTGTTTGATCAGTAGTAATTACTGCTTTACTATTACTATTGTCATTA	Arthropoda	Insecta	Diptera	Chloropidae	Polyodaspis	Polyodaspis sp.	35365	0	0	0	0	0	0	0	0	0	0	0	0	0	0	0	0	0	0	0	0	0	0	0	0	0	0	0	0	0	0	0	0	0	0	0	0	0	0	0	0	0
ASV301	TTTATCATCAGTAATTGCTCATGGAGGAGCTTCTGTTGACTTAGCAATTTTTTCTTTACACTTAGCTGGAGTCTCATCTATTTTAGGAGCTGTAAATTTTATTACTACAGTAATTAATATACGATCAACAGGAATTACATTTGATCGAATACCTTTATTTGTATGATCAGTAGTATTAACTGCTCTTCTTTTATTACTATCATTG	Arthropoda	Insecta	Diptera	Chloropidae	Siphonella	Siphonella sp.	6491	37	77	0	0	0	0	0	0	0	1682	0	0	0	0	0	0	0	0	0	0	0	0	0	0	0	0	0	0	0	0	0	0	0	0	0	0	0	0	0	0	0
ASV302	ACTTTCATCTATTATTGCACATGGAGGAGCTTCTGTAGATTTAGCAATTTTTTCATTACATTTGGCAGGGGTATCTTCAATTTTAGGGGCAGTAAATTTTATTACTACTGTTATTAACATACGATCAACAGGAATTACATTCGATCGAATACCTTTATTTGTTTGATCAGTAGTAATTACTGCTTTATTATTATTATTATCTTTA	Arthropoda	Insecta	Diptera	Chloropidae	Thaumatomyia	Thaumatomyia sp.	1595	0	0	0	0	0	0	0	0	0	0	0	0	0	0	0	0	0	0	0	0	0	0	0	0	0	0	0	0	0	0	0	0	0	0	0	0	0	0	0	0	0
ASV303	ATTATCATCAAGAATTGCTCATACTGGAGCATCTGTTGATTTAACTATTTTTTCTCTTCATTTAGCGGGAATTTCTTCTATTTTAGGGGCAGTAAATTTTATTACCACTATTATTAATATACGATCATCAGGTATTACTTTAGACCGATTACCTTTATTTGTATGATCTGTAATAATTACAGCAATTTTATTATTATTATCTTTA	Arthropoda	Insecta	Diptera	Culicidae	Aedes	Aedes alternans	260	0	0	0	0	0	0	0	0	0	0	0	0	0	0	0	0	0	0	0	0	0	0	0	0	0	0	0	0	0	0	0	0	0	0	0	0	0	0	0	0	0
ASV304	TCTCTCATCTGGAACTGCTCATGCTGGAGCTTCAGTTGACTTAACAATTTTTTCTTTACACTTAGCAGGAGTATCCTCTATTTTAGGAGCTGTAAATTTTATTACTACTGTAATTAACATACGATCTTCAGGAATTACTTTAGATCGTCTTCCTTTATTTGTTTGATCTGTTGTAATTACAGCTGTGTTATTACTTCTATCTCTT	Arthropoda	Insecta	Diptera	Culicidae	Aedes	Aedes notoscriptus	82319	0	0	0	0	0	0	0	0	0	0	0	0	0	0	0	0	0	0	0	0	0	0	0	0	0	0	0	0	0	0	0	0	0	0	29495	0	0	0	0	0	0
ASV305	TCTTTCATCAGGAATTGCCCATGCAGGAGGGTCAGTAGATTTAGCTATTTTTTCTTTACATTTAGCAGGAATTTCTTCAATTTTAGGAGCAGTAAATTTTATTACAACTGTAATTAACATACGATCTGCAGGAATTACATTAGATCGAATACCATTATTTGTATGATCAGTAGTAATTACTGCTATTCTCCTTCTTCTATCTTTA	Arthropoda	Insecta	Diptera	Culicidae	Anopheles	Anopheles sp.	3740	0	0	0	0	0	0	0	0	0	0	0	0	0	0	0	0	0	0	0	0	0	0	0	0	0	0	0	0	0	0	0	0	0	0	0	0	0	0	0	0	0
ASV306	ACTTTCATCTGGAACAGCACATGCAGGAGCTTCAGTAGATTTAGCTATTTTTTCTTTACATTTAGCTGGGATTTCTTCTATTTTAGGAGCAGTAAATTTTATTACAACAGTAATTAATATGCGATCATCTGGGATTACCCTTGATCGAATACCATTATTTGTTTGATCAGTAGTAATTACTGCTGTTCTATTACTTCTTTCTCTT	Arthropoda	Insecta	Diptera	Culicidae	Culex	Culex annulirostris	2269317	9029	13376	0	0	0	0	0	1	0	0	0	0	0	0	0	0	0	14	0	0	0	0	0	0	0	0	0	0	0	0	0	0	63	0	0	0	3	0	0	0	0
ASV307	TCTTTCATCTGGAACAGCTCATGCTGGAGCTTCAGTAGACTTAGCTATTTTTTCTTTACATCTAGCAGGAATTTCATCAATTTTAGGAGCAGTAAATTTTATTACAACAGTAATTAATATACGATCTTCAGGAATTACTCTTGATCGAATACCTTTATTTGTTTGATCAGTAGTAATTACTGCAGTATTATTACTTCTTTCTTTA	Arthropoda	Insecta	Diptera	Culicidae	Culex	Culex australicus	6381244	20757	30414	578	74987	22564	21	63448	74064	1842	102106	23	58802	9	150	6	5	0	0	0	2	0	0	0	0	0	0	7	0	0	0	37	0	193	0	6	0	0	0	0	1	0
ASV308	GCTTTCATCTGGAACAGCTCATGCTGGAGCTTCAGTAGACTTAGCTATTTTTTCTTTACATCTAGCAGGGATTTCATCAATTTTAGGAGCAGTAAATTTTATTACAACAGTAATTAATATACGATCTTCAGGAATTACTCTTGATCGAATACCTTTATTTGTTTGATCAGTAGTAATTACTGCAGTATTATTACTTCTTTCTTTA	Arthropoda	Insecta	Diptera	Culicidae	Culex	Culex globocoxitus	341	0	0	0	0	0	0	0	0	0	0	0	0	0	0	0	0	0	0	0	0	0	0	0	0	0	0	0	0	0	0	0	0	0	0	0	0	0	0	0	0	0
ASV309	TCTTTCATCTGGAACAGCTCATGCTGGAGCTTCAGTAGACTTAGCTATTTTTTCTTTACATTTAGCAGGAATTTCATCAATTTTAGGTGCAGTAAATTTTATTACAACAGTAATTAATATACGATCTTCAGGAATTACTCTTGATCGAATACCTTTATTTGTTTGATCAGTAGTAATTACTGCAGTTTTATTACTTCTTTCTTTA	Arthropoda	Insecta	Diptera	Culicidae	Culex	Culex molestus/quinquefasciatus/pipiens	81540	3	0	0	0	0	0	0	0	0	0	0	0	0	0	0	0	0	0	0	0	0	0	0	0	0	0	0	0	0	0	0	0	0	0	0	0	0	0	0	0	0
ASV310	TCTTTCATCAGGGACAGCCCATGCTGGAGCTTCAGTAGACTTAGCTATTTTTTCTTTACATCTAGCAGGAATTTCATCAATTTTAGGAGCAGTAAATTTTATTACAACAGTAATTAATATACGATCTTCAGGAATTACTCTTGATCGAATACCTTTATTTGTTTGATCAGTAGTAATTACTGCAGTATTATTACTTCTTTCTTTA	Arthropoda	Insecta	Diptera	Culicidae	Culex	Culex nr australicus	194	0	0	0	0	0	0	0	0	0	0	0	0	0	0	0	0	0	0	0	0	0	0	0	0	0	0	0	0	0	0	0	0	0	0	0	0	0	0	0	0	0
ASV311	TCTTTCATCTGGAACAGCCCATGCTGGAGCTTCAGTAGACATAGCTATTTTTTCTTTACATCTAGTAGGAATTTCATCAATTTTAGGAGCAGTAAATTTTATTACAACAGTAATTAATATACGATCTTCAGGAATTACACTTGACCGAATACCTGTATTTGATTGATCAGTAGTAATTACTGCAGTATTATTACTTCTTTCTTTA	Arthropoda	Insecta	Diptera	Culicidae	Culex	Culex sp.	175	0	0	0	175	0	0	0	0	0	0	0	0	0	0	0	0	0	0	0	0	0	0	0	0	0	0	0	0	0	0	0	0	0	0	0	0	0	0	0	0	0
ASV312	TTTATCAGCTAATACAGCTCATACTGGAGCATCCGTTGATTTAACAATTTTTTCTTTACATTTAGCTGGAGTTTCTTCAATTTTAGGAGCAGTAAATTTTATTACTACTGTTATTAATATACGATCTTCAGGAATTACTTTAGATCGAATACCTTTATTTGTTTGATCTGTAGTAATTACAGCAATTCTATTACTTCTTTCTCTT	Arthropoda	Insecta	Diptera	Culicidae	Mansonia	Mansonia uniformis	2820	0	0	12	4	0	13	6	4	4	7	0	2	15	232	34	0	4	157	0	4	4	163	53	0	0	0	25	442	12	19	182	0	76	179	108	3	0	0	0	0	0
ASV313	TTTATCTTCTGGTATTGCCCATGCAGGTGCTTCAGTAGATTTAGCAATTTTTTCTCTTCATTTAGCAGGAATTTCTTCAATTTTAGGAGCTGTAAATTTTATTACTACTGTAATTAATATACGATCCCCCGGAATTACATTAGATCGAATACCCTTATTTGTATGATCTGTAGTAATTACTGCAGTCTTATTACTTTTATCTTTA	Arthropoda	Insecta	Diptera	Culicidae	Neomyzomyia	Anopheles annulipes	62557	0	0	0	0	0	0	0	0	0	0	0	0	0	0	0	0	0	0	0	0	0	0	0	0	0	0	0	0	0	0	0	0	0	0	0	0	0	0	0	0	0
ASV314	TCTTTCATCTGGAACAGCTCATTCAGGAGCTTCTGTTGATTTATCTATTTTTTCTCTTCATTTAGCAGGAATTTCTTCTATTTTAGGAGCTGTAAACTTTATTACTACAGTAATTAATATACGATCAGCAGGTATTACACTAGATCGAATGCCTTTATTTGTTTGATCTGTTGTAATTACAGCTGTATTATTACTTTTATCATTA	Arthropoda	Insecta	Diptera	Culicidae	Tripteroides	Tripteroides atripes	671051	0	0	0	0	0	0	0	0	0	0	0	0	0	0	0	0	0	0	0	0	0	0	0	0	0	0	0	0	0	0	0	0	0	0	0	0	0	0	0	0	0
ASV315	TTTATCCTCTACAATTTCCCACTCAGGAGCATCTGTAGATTTATCAATTTTTTCCCTTCATTTGGCGGGAATTTCATCTATTTTGGGGGCTGTAAATTTTATTTCTACAATTATTAATATACGCACTCCTGGGATAACTTTTGATAAAATACCTTTATTCGTGTGGTCAGTATTTATTACAGCTATTCTTCTATTATTATCACTA	Arthropoda	Insecta	Diptera	Diptera sp.	Diptera sp.	Diptera sp. 01	40210	0	0	0	0	0	0	0	0	0	0	0	0	0	0	0	0	0	0	0	0	0	0	0	0	0	0	0	0	0	0	0	0	0	0	0	0	0	0	0	0	0
ASV316	ATTAGCTGCAAATATTTCTCATGCTGGGGCTTCTGTCGACTTGGCAATTTTTTCTTTACATTTAGCAGGAATTTCATCAATTTTAGGGGCAGTAAATTTTATTACAACCATTATTAATATACGTTCAACCGGAATTACATTTGATCGTATACCTTTATTTGTTTGGTCAGTTTTAATTACTGCTATTCTTTTACTTTTATCTTTA	Arthropoda	Insecta	Diptera	Diptera sp.	Diptera sp.	Diptera sp. 02	1479	0	0	0	0	0	0	0	0	0	0	0	0	0	0	0	0	0	0	0	0	0	0	0	0	0	0	0	0	0	0	0	0	0	0	0	0	0	0	0	0	0
ASV317	GCTATCTGCTGGAATTGCTCATGGAGGAGCTTCAGTAGACCTTGCAATTTTCTCTCTTCACCTAGCTGGTGCCTCTTCAATCTTAGGAGCTGTAAATTTCATTACTACCGTAATTAATATACGAGCAACTGGTATTTCATTTGACCGTATACCTCTTTTTGTTTGATCAGTAGTAATTACAGCAATTCTATTACTTTTATCCTTA	Arthropoda	Insecta	Diptera	Diptera sp.	Diptera sp.	Diptera sp. 03	444	0	0	0	0	0	0	0	0	0	0	0	0	0	0	0	0	0	0	0	0	0	0	0	0	0	0	0	0	0	0	0	0	0	0	0	0	0	0	0	0	0
ASV318	TTTATCATCAGTAATTGCTTATGGAGGAGCTTCAGTTGACTTAGCAATTTTTTCTTTATATTTAGCTGGAGTTTCATCTATTTTAGGAGCTGTAAATTTTATTACTACTGCAATTAATATACGATCGACAGGAATTACATTTGATCGAATACCTTTATTTGTATGATCAGTAGTATTAACCGCTCTACTTCTATTATCATCATTA	Arthropoda	Insecta	Diptera	Diptera sp.	Diptera sp.	Diptera sp. 04	350	0	0	0	0	0	0	0	0	0	71	0	0	0	0	0	0	0	0	0	0	0	0	0	0	0	0	0	0	0	0	0	0	0	0	0	0	0	0	0	0	0
ASV319	CCTTTCTTCCGGAATTGCTCATAGAGGAGCTTCAGTTGACTTAGCTATTTTTTCTCTTCATTTAGCCGGGATTTCTTCTATTTTAGGAGCAGTAAATTTTATTACAACTGTAATTAATATACGATCACCAGGAATCTCATTTGACCGAATACCTTTATTTGTATGATCAGTTGTTATTACAGCTCTTCTTCTTTTACTTTCTTTA	Arthropoda	Insecta	Diptera	Diptera sp.	Diptera sp.	Diptera sp. 05	35326	0	0	0	0	0	0	0	0	0	0	0	0	0	0	0	0	0	0	0	0	0	0	0	0	0	0	0	0	0	0	0	0	0	0	0	0	0	0	0	0	0
ASV320	ACTATCTGCTGGAATTGCCCATGGAGGAGCATCAGTTGATCTAGCAATCTTCTCTCTTCATTTAGCAGGAATTTCATCAATTCTAGGAGCTGTAAATTTTATTACTACTGTAATTAATATACGATCTGCGGGAATCTCCCTAGATCGTATACCCTTATTTGTTTGATCAGTAGTAATTACTGCTATCTTATTACTTCTCTCTCTA	Arthropoda	Insecta	Diptera	Diptera sp.	Diptera sp.	Diptera sp. 06	6300	0	0	0	0	0	0	0	0	0	0	0	0	0	0	0	0	0	0	0	0	0	0	0	0	0	0	0	0	0	0	0	0	0	0	0	0	0	0	0	0	0
ASV321	CCTTTCTTCAGGGATTGCCCATGGAGGAGCCTCAGTTGATCTAGCAATCTTCTCATTACATCTAGCTGGAGTTTCATCTATTTTAGGAGCTGTAAACTTTATTACAACAGTAATTAATATACGATCTTCAGGAATCTCCTTTGACCGTATACCTCTATTTGTTTGATCAGTAGTAATTACAGCTCTATTATTACTCCTATCATTG	Arthropoda	Insecta	Diptera	Diptera sp.	Diptera sp.	Diptera sp. 07	52171	0	0	0	0	0	0	0	0	0	0	0	0	0	0	0	0	0	0	0	0	0	0	0	0	0	0	0	0	0	0	0	0	0	0	0	0	0	0	0	0	0
ASV322	ATTATCTGCAGGAATTGCTCATGGAGGAGCCTCAGTAGACTTAGCAATTTTTTCCCTTCATTTAGCCGGAGTATCATCTATTTTAGGAGCAGTAAATTTCATTACCACAGTAATTAATATACGATCTCCAGGAATTTCATTTGACCGAATACCACTATTTGTATGATCAGTAGTAATTACAGCACTATTATTATTACTTTCATTA	Arthropoda	Insecta	Diptera	Diptera sp.	Diptera sp.	Diptera sp. 08	173133	0	0	0	0	0	25059	0	0	0	0	0	0	0	0	0	0	0	0	0	0	0	0	0	0	0	0	0	0	0	0	0	0	0	0	0	0	0	0	0	0	0
ASV323	TTTAGCTTCAGGAATTGCTCATGCTGGTGCCTCAGTAGATCTTGCTATTTTTTCATTACACTTAGCGGGAATTTCTTCAATTTTAGGTGCTGTAAATTTTATTACAACAGTAATTAATATACGTTCTAATGGAATTACTTTAGATCGAATACCCTTATTTGTTTGATCCGTAGTTATTACTGCAGTATTACTTCTTTTATCATTA	Arthropoda	Insecta	Diptera	Diptera sp.	Diptera sp.	Diptera sp. 09	250055	0	0	0	0	0	0	0	0	0	0	0	0	0	0	0	0	0	0	0	0	0	0	0	0	0	0	0	0	0	0	0	0	0	0	0	0	0	0	0	0	0
ASV324	GCTTTCATCTGGGATTGCTCATGGCGGAGCTTCAGTAGATCTTGCTATTTTTTCCCTTCACCTTGCTGGAATTTCTTCAATTTTAGGAGCAGTAAATTTTATTACTACTGTTATTAACATACGATCTACAGGAATTACATTTGATCGAATACCTTTATTTGTTTGATCAGTAGTAATTACTGCTTTATTATTACTTTTATCTTTA	Arthropoda	Insecta	Diptera	Diptera sp.	Diptera sp.	Diptera sp. 10	19352	0	0	0	0	0	0	0	0	0	0	0	0	0	0	0	0	0	0	0	0	0	0	0	0	0	0	0	0	0	0	0	0	0	0	0	0	0	0	0	0	0
ASV325	TCTTTCCGGTAGAATTGCCCATGGGGGAGCTTCAGTTGACTTAGCCATCTTCTCTCTTCATTTAGCTGGAATTTCTTCAATTCTAGGAGCAGTAAATTTTATTACAACAGTAATTAATATACGAGCCCCAGGAATCTCCTTTGATCGAATACCTCTATTTGTCTGATCAGTAGTAATTACTGCTCTACTTTTATTATTATCCTTA	Arthropoda	Insecta	Diptera	Diptera sp.	Diptera sp.	Diptera sp. 11	154505	0	0	0	0	0	0	0	0	0	0	0	0	0	0	0	0	0	0	0	0	0	0	0	0	0	0	0	0	0	0	0	0	0	0	0	0	0	0	27868	30463	0
ASV326	TTTATCAAGAGGAATTGCCCATGGAGGAGCTTCAGTAGACTTAGCCATCTTTTCCCTTCATCTAGCTGGTGTCTCTTCCATTTTAGGAGCCGTAAATTTTATTACTACAGTAATTAATATACGATCCACAGGTATTACATTTGATCGAATACCCCTATTTGTATGATCTGTTGTTATTACTGCAATCCTTCTTCTTCTTTCTCTA	Arthropoda	Insecta	Diptera	Diptera sp.	Diptera sp.	Diptera sp. 12	285796	0	0	0	0	0	0	0	0	0	0	0	0	0	0	0	0	0	0	0	0	0	0	0	0	0	0	0	0	0	0	0	0	0	0	0	0	0	0	0	0	0
ASV327	TTTATCCTCAGGAATTGCCCATAGAGGGGCTTCAGTCGATTTAGCTATTTTTTCTCTTCACCTTGCAGGTATTTCTTCAATTCTAGGAGCTGTTAATTTCATTACAACAGTAATTAATATACGATCTCCTGGAATTTCATTAGACCGAATACCTTTATTTGTTTGATCAGTTGTTATTACAGCTTTACTACTTCTTCTTTCTCTC	Arthropoda	Insecta	Diptera	Diptera sp.	Diptera sp.	Diptera sp. 13	56823	0	0	0	0	0	0	0	0	0	0	0	0	0	0	0	0	0	0	0	0	0	25	0	0	0	0	0	0	0	0	0	0	0	0	15	0	0	0	0	0	0
ASV328	TCTATCAGCAGGTATTGCTCATGGAGGTGCATCAGTTGACTTAGCAATTTTCTCACTTCATCTAGCAGGAATCTCATCAATTCTAGGAGCAGTAAACTTCATTACAACTGTAATTAATATACGGTCAACAGGTATTACACTAGATCGAATACCCCTATTCGTATGATCAGTAGTAATTACAGCTATTCTATTATTACTTTCACTA	Arthropoda	Insecta	Diptera	Diptera sp.	Diptera sp.	Diptera sp. 14	166913	0	0	0	0	0	0	0	0	0	0	0	0	0	0	0	0	0	0	0	0	0	0	0	0	0	0	0	0	0	0	0	0	0	0	0	0	0	0	0	0	0
ASV329	CCTCTCATCTAATATTGCACATGGAGGGGCTTCTGTTGATTTAGCTATTTTCTCTCTACATTTAGCAGGAATTTCATCTATCTTAGGAGCTGTAAATTTTATTACAACGGTAATAAATATACGATCAACAGGAATTACTTTTGATCGAATACCTCTATTTGTTTGATCAGTAGTTATTACAGCCCTTCTTTTATTACTTTCTTTA	Arthropoda	Insecta	Diptera	Diptera sp.	Diptera sp.	Diptera sp. 15	130297	0	0	0	0	0	0	0	0	0	0	0	0	0	0	0	0	0	0	0	0	0	0	0	0	0	0	0	0	0	0	0	129833	0	0	0	0	0	0	0	0	0
ASV330	TCTTTCTTCAAATATTGCTCATAGAGGAGCATCAGTAGATTTAGCTATTTTTTCCCTTCATTTAGCAGGTATTTCTTCTATTTTAGGATCCGTAAATTTTATTACTACTACAATTAATATACGATCTAATGGAATTACTCTTGATCGAATGCCTTTATTTGTCTGATCAGTAGTAATTACAACTATTCTTCTATTATTATCTTTA	Arthropoda	Insecta	Diptera	Diptera sp.	Diptera sp.	Diptera sp. 16	95448	0	0	0	0	0	0	0	0	0	0	0	0	0	0	0	0	0	0	0	0	0	0	0	0	0	0	0	0	0	0	0	0	0	0	0	0	0	0	22694	21680	0
ASV331	TTTAGCTGGTAATATCGCTCATGGAGGGTCTTCCGTTGATTTAGCTATCTTTTCACTTCATTTAGCAGGAATTTCTTCAATTCTTGGTGCAGTTAATTTTATTACAACTATTATTAATATACGATCAAATGGAATTACATTTGACCGTATACCTTTATTTGTATGATCAGTATTAATTACAGCTGTTCTACTGCTTTTATCATTA	Arthropoda	Insecta	Diptera	Diptera sp.	Diptera sp.	Diptera sp. 17	94710	0	0	0	0	0	0	0	0	0	0	0	0	0	0	0	0	0	0	0	0	0	0	0	0	0	0	0	0	0	0	0	0	0	0	0	0	0	0	0	0	0
ASV332	TCTTTCTTCTGCAATCGCACATAGTGGATCATCTGTTGATTTAGCAATTTTTTCTTTACATTTAGCAGGAGTTTCATCAATTTTAGGTTCAGTAAATTTTATTACCACAGTAATTAATATACGAACAAATGGAATTACTCTTGATCGAATACCTTTATTTGTATGATCGGTAGTAATTACAACTGTTCTACTTTTATTATCACTC	Arthropoda	Insecta	Diptera	Diptera sp.	Diptera sp.	Diptera sp. 18	88676	0	0	0	0	0	0	0	0	0	0	0	0	0	0	0	0	0	0	0	0	0	0	0	0	0	0	0	0	0	0	0	0	0	0	0	0	0	0	0	0	0
ASV333	ATTATCAGCAGCTATTGCTCATAGAGGGGCATCTGTTGATCTTGCTATTTTTTCACTTCATTTAGCGGGAGTATCGTCTATTCTTGGATCAGTAAATTTTATTACTACAGTAATTAATATGCGAGCAAATGGAATTACTCTTGATCGAATACCTTTATTTGTTTGATCTGTTGTAATTACAACAGTTCTTCTTCTTCTTTCTCTG	Arthropoda	Insecta	Diptera	Diptera sp.	Diptera sp.	Diptera sp. 19	84824	0	0	0	0	0	0	0	0	0	0	0	0	0	0	0	0	0	0	0	0	0	0	0	0	0	0	0	0	0	0	0	0	0	0	0	0	0	0	42633	42170	0
ASV334	TTTAGCAGCTAACGTTTCTCACGCAGGAGCTTCTGTTGATTTAGCAATTTTTTCTCTTCATTTAGCTGGGATTTCTTCTATTTTAGGGGCTGTAAATTTTATTACTACAATTATTAATATACGATCTACAGGTATTACATTTGATCGAATACCATTATTTGTTTGATCAGTATTTATTACAGCTATTTTACTTCTTCTTTCATTA	Arthropoda	Insecta	Diptera	Diptera sp.	Diptera sp.	Diptera sp. 20	73291	0	0	0	0	0	0	0	0	0	0	0	0	0	0	0	0	0	0	0	0	0	0	0	0	0	0	0	0	0	0	0	0	0	0	0	0	0	0	0	0	0
ASV335	ATTATCAGCAAATATCGCACATGCCGGAGCATCTGTTGACCTAGCAATTTTTTCTTTACATTTAGCAGGTATTTCTTCCATTTTAGGAGCAGTAAACTTTATTACCACAATTATTAATATACGATCAAATGGTATTTCTTTTGATCGAATACCTTTATTTGTTTGATCAGTATTAATTACAGCTATTCTTCTACTTTTATCATTA	Arthropoda	Insecta	Diptera	Diptera sp.	Diptera sp.	Diptera sp. 21	59432	0	0	0	0	0	0	0	0	0	0	0	0	0	0	0	0	0	0	0	0	0	0	0	0	0	0	0	0	0	0	0	0	0	0	0	0	0	0	0	0	0
ASV336	GTTATCTTCTACTATTGCTCATAGAGGAGCTTCTGTAGATTTAGCAATTTTTAGCCTTCATTTAGCTGGAATTTCGTCTATTTTAGGAGCAGTAAATTTCATTTCAACAATTATTAATATACGATCCCCAGGAATAAGATTTGATCGCATGCCTCTTTTTGTTTGATCAGTAGCTATTACAGCCCTATTACTTCTCCTATCTCTA	Arthropoda	Insecta	Diptera	Diptera sp.	Diptera sp.	Diptera sp. 22	43631	0	0	0	0	0	0	0	0	0	0	0	0	0	0	0	0	0	0	0	0	0	0	0	0	0	0	0	0	0	0	0	0	0	0	0	0	0	0	0	0	0
ASV337	TTTATCATCAAATATTGCCCATGGAGGTGCTTCTGTAGATCTAGCTATTTTTTCATTACATTTAGCTGGTATTTCTTCTATTTTAGGAGCAGTTAATTTCATTACAACAGTAATTAATATACGGTCAACTGGGATTACTTTTGATCGAATACCCTTATTTGTTTGATCAGTAGCAATTACAGCATTATTACTATTACTATCTCTT	Arthropoda	Insecta	Diptera	Diptera sp.	Diptera sp.	Diptera sp. 23	43090	0	0	0	0	0	0	0	0	0	0	0	0	0	0	0	0	0	0	0	0	0	0	0	0	0	0	0	0	0	0	0	0	0	0	0	0	0	0	0	0	0
ASV338	TCTTTCTTCTACAATTGCCCATAGTGGGGCTTCGGTTGATTTAGCCATTTTCTCACTTCATCTCGCAGGGGTTTCTTCAATTTTAGGGTCAGTAAATTTTATTACAACAGTAATTAACATACGAGCAAATGGTATTACTCTTGATCGAATACCTTTATTTGTTTGATCAGTTGTAATTACTACAGTTCTTTTACTTTTATCCCTT	Arthropoda	Insecta	Diptera	Diptera sp.	Diptera sp.	Diptera sp. 24	48978	0	0	0	0	0	0	0	0	0	0	0	0	0	0	0	0	0	0	0	0	0	0	0	0	0	0	0	0	0	0	0	0	0	0	0	0	0	0	0	0	0
ASV339	TCTTTCATCTAATATTGCCCACAGAGGTGCCTCTGTTGATTTAGCAATTTTTTCTTTACATTTAGCTGGTATTTCTTCTATTTTAGGATCTGTAAATTTTATTACAACCGCAATTAATATACGAAGAAATGGCATTTCTTTAGATCGAATGCCTTTATTTGTATGATCAGTAGTAATTACAACTATTCTTCTATTACTTTCTCTA	Arthropoda	Insecta	Diptera	Diptera sp.	Diptera sp.	Diptera sp. 25	32133	0	0	0	0	0	0	0	0	0	0	0	0	0	0	0	0	0	0	0	0	0	0	0	0	0	0	0	0	0	0	0	0	0	0	0	0	0	0	0	0	0
ASV340	TCTTTCATCTACTTTATCACACTCAGGAGCTTCTGTTGATTTATCAATTTTCTCATTACATTTAGCTGGGATTTCTTCTATTTTAGGTGCTGTAAATTTTATTTCAACTATTATTAACATGCGAGCTCCTGGGATATCATTTGATAAAATACCCTTATTTGTTTGGTCTGTCCTTATTACTGCAATTTTATTACTTTTATCTTTA	Arthropoda	Insecta	Diptera	Diptera sp.	Diptera sp.	Diptera sp. 26	27650	0	0	0	0	0	0	0	0	0	0	0	0	0	0	0	0	0	0	0	0	0	0	0	0	0	0	0	0	0	0	0	0	0	0	0	0	0	0	0	0	0
ASV341	TTTATCTTCAGGAATTGCACATGGAGGGGCCTCAGTTGATTTAGCAATTTTTAGCCTTCATTTAGCTGGTGTTTCTTCAATTTTAGGTGCAGTAAATTTCATTACCACAGTAATTAATATACGATCTACTGGAATTACCTTTGATCGAATGCCCCTATTTGTTTGATCAGTAGTAATTACTGCCTTACTTCTTCTTTTATCTCTC	Arthropoda	Insecta	Diptera	Diptera sp.	Diptera sp.	Diptera sp. 27	23543	0	0	0	0	0	0	0	0	0	0	0	0	0	0	0	0	0	0	0	0	0	0	0	0	0	0	0	0	20615	0	0	0	0	0	0	0	0	0	0	0	0
ASV342	ACTTTCATCAATCATTGCCCACGGAGGAGCCTCTGTTGATTTAGCAATTTTTTCACTTCACTTAGCTGGGGTGTCTTCTATTTTAGGAGCAGTTAATTTTATTACAACAGTTATTAATATACGATCAACAGGGATTACTTTTGACCGAATGCCCCTATTTGTATGGTCTGTCGTAATTACTGCTTTATTACTTCTTTTATCATTG	Arthropoda	Insecta	Diptera	Diptera sp.	Diptera sp.	Diptera sp. 28	21930	0	0	0	0	0	0	0	0	0	0	0	0	0	0	0	0	0	0	0	0	0	0	0	0	0	0	0	0	0	0	0	0	0	0	0	0	0	0	0	0	0
ASV343	TCTTTCAAGTAATATTGCTCATAGTGGGGCTTCTGTTGATTTAGCTATTTTTTCACTTCATTTAGCAGGAATTTCATCTATTTTAGGAGCTGTAAATTTTATTACTACAGTAATTAATATACGATCAACAGGAATCACTTTAGATCGTATACCATTATTTGCTTGATCAGTTGTAATTACAGCTGTTTTACTACTTCTCTCTTTA	Arthropoda	Insecta	Diptera	Diptera sp.	Diptera sp.	Diptera sp. 29	24812	583	908	0	0	0	0	0	0	0	0	0	0	0	0	0	0	0	0	0	0	0	0	0	0	0	0	0	0	0	21	612	0	0	0	0	0	0	0	0	0	0
ASV344	CCTCTCGGCAGGAATTGCCCATGGAGGAGCTTCAGTAGATCTGGCCATTTTCTCTCTCCACTTAGCAGGTATTTCATCAATTCTAGGAGCAGTTAACTTCATTACTACAGTTATTAATATACGATCAACGGGAATTACCCTAGACCGAATACCCCTATTTGTGTGATCTGTAGTAATTACAGCCATCCTCCTGTTATTATCTTTA	Arthropoda	Insecta	Diptera	Diptera sp.	Diptera sp.	Diptera sp. 30	14593	0	0	0	0	0	0	0	0	0	0	0	0	0	0	0	0	0	0	0	0	0	0	0	0	0	0	0	0	0	0	0	10122	0	0	3376	0	0	0	0	0	0
ASV345	TTTATCTTCTATTATTGCACATGGAGGAGCATCAGTAGATTTAGCTATTTTTTCCCTACATTTAGCTGGAATCTCATCAATTTTAGGAGCAGTAAACTTCATTACAACAATTATTAATATACGTTCAGTTGGAATCAATTTCGATCGAATACCTTTATTTGTTTGATCTGTTTTTATTACTGCTATTTTGTTACTTTTATCTCTC	Arthropoda	Insecta	Diptera	Diptera sp.	Diptera sp.	Diptera sp. 31	11784	0	0	0	0	0	0	0	0	0	0	0	0	0	0	0	0	0	0	0	0	0	0	0	0	0	0	0	0	0	0	0	0	0	0	0	0	0	0	0	0	0
ASV346	ATTATCAGCTAATATTGCTCACAGAGGAGCATCAGTAGATTTAGCTATTTTTTCATTACATTTAGCTGGAATTTCTTCAATTTTAGGAGCAGTAAATTTTATTACTACAGTAATTAATATACGATCAGTTGGAATTACTTTTGATCGAATACCAATATTTGTTTGATCTGTTGTAATTACAGCTTTATTATTACTTTTATCTTTA	Arthropoda	Insecta	Diptera	Diptera sp.	Diptera sp.	Diptera sp. 32	11475	0	0	0	0	0	0	0	0	0	0	0	0	0	0	0	0	0	0	0	0	0	0	0	0	0	0	0	0	0	0	0	0	0	0	0	0	0	0	0	0	0
ASV347	ATTATCAGCAGGAATTGCTCACGGAGGGGCATCAGTAGACTTAGCTATTTTCTCTCTACACCTTGCAGGTATTTCGTCAATTTTAGGAGCCGTAAACTTCATTACAACAGTTATTAATATACGATCCACAGGTATCACACTTGACCGTATACCCTTATTTGTATGATCAGTAGTAATTACCGCAATCTTATTATTACTATCTCTG	Arthropoda	Insecta	Diptera	Diptera sp.	Diptera sp.	Diptera sp. 33	10502	0	0	0	0	0	0	0	0	0	0	0	0	0	0	0	0	0	0	0	0	0	0	0	0	0	0	0	0	0	0	0	0	0	0	0	0	0	0	0	0	0
ASV348	CTTATCTTCTATTATTGCTCATGGAGGTAGCTCCGTTGATTTAACTATTTTTTCTCTTCATTTAGCTGGTATTTCTTCTATTTTAGGAGCAGTAAATTTTATCACTACTGTAATTAATATACGATCTATTGGTATCACTTTTGATCGAATACCTTTATTTGTCTGATCTGTTGTTATCACTGCTTTATTACTTTTATTATCATTA	Arthropoda	Insecta	Diptera	Diptera sp.	Diptera sp.	Diptera sp. 34	10149	0	0	0	0	0	0	0	0	0	0	0	0	0	0	0	0	0	0	0	0	0	0	0	0	0	0	0	0	0	0	0	0	0	0	0	0	0	0	0	0	0
ASV349	TCTTTCGTCAGTTATTGCCCACAGAGGAGCCTCTGTTGATTTAGCAATTTTTTCCCTCCATTTAGCAGGAATTTCCTCCATTCTAGGAGCCGTTAATTTTATTACAACTATTATTAATATACGAGCCACAGGAATCTCTTATGATCGAATACCTTTATTTGTCTGATCAGTTATAATTACTGCTTTCTTATTACTTCTTTCCCTT	Arthropoda	Insecta	Diptera	Diptera sp.	Diptera sp.	Diptera sp. 35	8682	0	0	0	0	0	0	0	0	0	0	0	0	0	0	0	0	0	0	0	0	0	0	0	0	0	0	0	0	0	0	0	0	0	0	0	0	0	0	0	0	0
ASV350	TCTTTCCTCTAATATCGCTCATAGAGGAGCTTCTGTAGATTTATCAATTTTTTCTCTCCATTTAGCTGGAATTTCATCAATTTTAGGTGCAGTAAATTTTATCACTACTGTAATTAATATACGTTCAGTCGGAATTACATTTGATCGAATACCTTTATTTGTTTGATCTGTTGTAATTACAGCATTACTTCTTCTCCTATCATTA	Arthropoda	Insecta	Diptera	Diptera sp.	Diptera sp.	Diptera sp. 36	8548	0	0	0	0	0	0	0	0	0	0	0	0	0	0	0	0	0	0	0	0	0	0	0	0	0	0	0	0	0	0	0	0	0	0	0	0	0	0	0	0	0
ASV351	ATTAGCTAGTAATATTGCTCATGGAGGAGCATCAGTCGATTTAGCAATCTTTTCTCTTCATCTAGCAGGAATTTCTTCTATTCTAGGAGCAGTAAATTTTATTACAACTATTATTAACATACGATCTAAGGGGATCACTTTTGATCGTATACCTCTTTTTGTATGATCAGTATTTATTACAGCAATTCTTTTATTGTTATCATTA	Arthropoda	Insecta	Diptera	Diptera sp.	Diptera sp.	Diptera sp. 37	4816	0	0	0	0	0	0	0	0	0	0	0	0	0	0	0	0	0	0	0	0	0	0	0	0	0	0	0	0	0	0	0	0	0	0	0	0	0	0	0	0	0
ASV352	TCTTTCTTCAAGAATTGCTCATGCTGGGGCATCTGTTGATTTAGCAATTTTTTCTCTTCATTTAGCAGGAATCTCTTCAATTTTAGGAGCTGTAAATTTTATTACAACAATCATTAATATACGATCAATAGGATTATCTTTAGATCGAATACCTTTATTTGTATGATCTGTTTTTATTACAGCTATTTTACTTCTTCTTTCTTTA	Arthropoda	Insecta	Diptera	Diptera sp.	Diptera sp.	Diptera sp. 38	4123	0	0	0	0	0	0	0	0	0	0	0	0	0	0	0	0	0	0	0	0	0	0	0	0	0	0	0	0	0	0	0	0	0	0	0	0	0	0	0	0	0
ASV353	TTTATCAGCAAACGTATCCCACGCTGGAGCTTCAGTTGATTTAGCTATTTTTTCTTTACATTTGGCCGGTATCTCTTCAATTTTAGGAGCAGTAAATTTTATTACTACTATTATTAATATACGATCTAATGGAATTACTTTCGACCGAATACCTTTATTTGTATGATCAGTATTAATTACTGCCATTTTATTACTTTTATCTTTA	Arthropoda	Insecta	Diptera	Diptera sp.	Diptera sp.	Diptera sp. 39	3102	0	0	0	0	0	0	0	0	0	0	0	0	0	0	0	0	0	0	0	0	0	0	0	0	0	0	0	0	0	0	0	0	0	0	0	0	0	0	0	0	0
ASV354	ATTAGCAGCAAATGTATCACATGCTGGAGCTTCTGTAGATTTAGCAATTTTTTCTCTTCATTTAGCAGGGATCTCTTCTATTTTAGGGGCAGTAAATTTTATTACTACTATTATTAATATACGATCAACAGGAATTACTTTTGATCGAATACCTTTGTTTGTTTGATCAGTATTTATTACAGCCATTTTACTATTACTTTCTCTT	Arthropoda	Insecta	Diptera	Diptera sp.	Diptera sp.	Diptera sp. 40	2830	0	0	0	1	0	1	0	0	0	0	0	0	0	80	12	1	0	56	0	0	0	0	73	0	0	0	0	0	0	0	0	0	1893	0	0	0	0	0	0	0	0
ASV355	TTTATCTTCAACTATTGCTCATTCAGGAGGATCGGTCGATTTATCAATTTTTTCTTTACACCTAGCAGGGATCTCCTCAATTTTAGGGGCAGTAAACTTTATTTCTACAATTATTAATATACGAGCTCCAGGTATAAGATTTGATAAAATACCTTTATTTGTATGATCGGTATTAATTACAGCTATTTTATTACTTCTTTCATTA	Arthropoda	Insecta	Diptera	Diptera sp.	Diptera sp.	Diptera sp. 41	2799	0	0	0	0	0	0	0	0	0	0	0	0	0	0	0	0	0	0	0	0	0	0	0	0	0	0	0	0	0	0	0	0	0	0	0	0	0	0	0	0	0
ASV356	TTTAGCTGCTAATATTTCTCATGCAGGATCTTCAGTAGATTTTGCTATTTTTTCCCTTCATTTAGCTGGAATTTCATCAATTTTAGGAGCAGTAAATTTTATCACTACAATTATTAATATACGATCAAATGGAATTTCTTTTGATCGAATACCTTTATTTGTATGATCAGTATTAATTACAGCTGTTTTACTACTTTTATCTTTA	Arthropoda	Insecta	Diptera	Diptera sp.	Diptera sp.	Diptera sp. 42	2587	0	0	2587	0	0	0	0	0	0	0	0	0	0	0	0	0	0	0	0	0	0	0	0	0	0	0	0	0	0	0	0	0	0	0	0	0	0	0	0	0	0
ASV357	TTTATCTTCAATTATTGCCCATGGTGGGGCATCAGTTGATTTAGCTATTTTTTCATTACATCTTGCAGGTGTATCTTCAATTTTAGGAGCTGTAAATTTTATTACTACAGTTATTAATATACGATCAGTTGGAATTACATTTGACCGAATACCATTATTTGTGTGATCAGTAGTAATTACTGCTTTACTTTTACTTCTTTCACTG	Arthropoda	Insecta	Diptera	Diptera sp.	Diptera sp.	Diptera sp. 43	2480	0	0	0	0	0	0	0	0	0	0	0	0	0	0	0	0	0	0	0	0	0	0	0	0	0	0	0	0	0	0	0	0	0	0	0	0	0	0	0	0	0
ASV358	TTTATCATCTAATATTGCTCATGGAGGAGCATCAGTTGATTTAGCTATTTTTTCTCTCCACTTAGCTGGAATTTCCTCAATTTTAGGAGCTGTAAATTTTATTACAACCGTAATTAATATACGAGCTGCAGGAATCACATTTGATCGAATACCTTTATTTGTATGATCTGTAGCAATTACAGCTTTATTATTACTTCTTTCTTTA	Arthropoda	Insecta	Diptera	Diptera sp.	Diptera sp.	Diptera sp. 44	1994	0	0	0	0	0	0	0	0	0	0	0	0	0	0	0	0	0	0	0	0	0	0	0	0	0	0	0	0	0	0	0	0	0	0	0	0	0	0	0	0	0
ASV359	TCTTTCATCAGGAATTGCCCATGCAGGAGGGTCAGTAGATTTAGCTATTTTTTCTTTACATTTAGCAGGAATTTCTTCAATTTTAGGAGCAGTAAATTTTATTACAACTGTAATTAACATACGATCTGCAGGAATTACATTAGACCGAATACCATTATTTGTGTGATCAGTAGTAATTACTGCTATTCTTCTTCTTCTATCTTTA	Arthropoda	Insecta	Diptera	Diptera sp.	Diptera sp.	Diptera sp. 45	5845	0	0	0	0	0	0	0	0	0	0	0	0	0	0	0	0	0	0	0	0	0	0	0	0	0	0	0	0	0	0	0	0	0	0	0	0	0	0	0	0	0
ASV360	TCTGTCTTCAAATATTGCACATAGAGGAGCATCTGTAGATTTAGCTATTTTTAGCCTTCATTTAGCAGGAATTTCATCTATTTTAGGAGCTGTAAATTTCATTACAACAGTCATTAATATACGAGCAACAGGAATAACATTTGATCGAATACCATTATTTGTTTGATCAGTAGTATTAACAGCCCTATTATTACTACTATCTTTA	Arthropoda	Insecta	Diptera	Diptera sp.	Diptera sp.	Diptera sp. 46	1840	0	0	0	0	0	0	0	0	0	0	0	0	0	0	0	0	0	0	0	0	0	0	0	0	0	0	0	0	0	0	0	0	0	0	0	0	0	0	0	0	0
ASV361	ACTTTCTTCTAGAATTGCTCATAGAGGGGCTTCTGTAGATTTAGCAATTTTTTCTCTTCATTTAGCAGGAATTTCTTCTATTCTTGGAGCTGTAAATTTTATTACTACAATCATTAATATACGATCTTCAGGAATTACATTTGACCGAATACCTTTATTTGTTTGATCAGTGGGAATTACGGCCGTATTACTTCTTCTTTCACTG	Arthropoda	Insecta	Diptera	Diptera sp.	Diptera sp.	Diptera sp. 47	1746	0	0	0	0	0	0	0	0	0	0	0	0	0	0	0	0	0	0	0	0	0	0	0	0	0	0	0	0	0	0	0	0	0	0	0	0	0	0	0	0	0
ASV362	CTTATCTAATAATATTGCACATGCTGGAGCTTCTGTTGATTTAGCTATTTTTTCTCTTCATTTAGCAGGAATCTCTTCAATTTTAGGAGCCGTAAATTTTATTACAACTATTATTAATATACGATCAACAGGAATAACATTAGACCGAATACCTCTGTTTGTCTGATCAGTTGTAATTACTGCTGTACTTCTTCTATTATCATTA	Arthropoda	Insecta	Diptera	Diptera sp.	Diptera sp.	Diptera sp. 48	1449	0	0	0	0	0	0	0	0	0	0	0	0	0	0	0	0	0	0	0	0	0	0	0	0	0	0	0	0	0	0	0	0	0	0	0	0	0	0	0	0	0
ASV363	TCTTTCTTCTAGAATTGCTCATAGAGGAGCTTCTGTAGATTTAGCTATTTTTTCTCTCCATCTAGCAGGTATTTCTTCTATTCTAGGAGCTGTAAATTTTATTACTACAATCATTAATATACGATCTTCTGGAATTACTTTTGATCGAATACCTTTATTTGTCTGATCTGTAGGAATTACTGCATTACTTCTACTCTTATCATTA	Arthropoda	Insecta	Diptera	Diptera sp.	Diptera sp.	Diptera sp. 49	1311	0	0	0	0	0	0	0	0	0	0	0	0	0	0	0	0	0	0	0	0	0	0	0	0	0	0	0	0	1231	0	0	0	0	0	0	0	0	0	0	0	0
ASV364	TTTATCATCTACTATTGCCCATGCTGGAGCTTCCGTTGATTTAGCAATTTTTTCTCTACATTTAGCTGGAATTTCCTCTATTTTAGGGGCCGTAAATTTTATTACTACAGTAATTAATATACGAGCCCCGGGAATTACTTTTGATCGAATACCTTTATTTGTATGATCAGTTTTAATTACTGCTATTCTATTATTATTATCTTTA	Arthropoda	Insecta	Diptera	Diptera sp.	Diptera sp.	Diptera sp. 50	1141	0	0	0	0	0	0	0	0	0	0	0	0	0	0	0	0	0	0	0	0	0	0	0	0	0	0	0	0	1141	0	0	0	0	0	0	0	0	0	0	0	0
ASV365	TCTATCTTCAATTATTGCCCATGGAGGAGCTTCAGTTGATTTAGCTATTTTTTCTTTACACTTAGCAGGAGTTTCTTCAATTTTAGGAGCCGTAAACTTTATTACAACAGTAATTAATATACGATCTACAGGAATTACTTTTGATCGAATACCATTATTTGTATGATCAGTAGTAATTACTGCTCTACTTCTATTATTATCATTA	Arthropoda	Insecta	Diptera	Diptera sp.	Diptera sp.	Diptera sp. 51	47365	0	0	4147	0	0	0	0	0	1836	0	0	0	0	0	0	0	0	0	0	0	0	0	0	0	0	0	0	0	0	0	0	0	0	0	0	0	10225	4	0	0	0
ASV366	ATTATCTTCAATTATTGCCCATGGAGGAGCTTCTGTTGATTTAGCTATTTTTTCATTACATTTAGCTGGGGTTTCATCAATTTTAGGTGCAGTAAATTTTATTACAACTGTTATTAATATACGAGCAACTGGAATTACTTTTGATCGAATACCATTATTTGTTTGATCAGTAGTAATTACTGCTTTATTATTGCTGCTTTCATTG	Arthropoda	Insecta	Diptera	Diptera sp.	Diptera sp.	Diptera sp. 52	2462	0	0	0	0	0	0	1168	1294	0	0	0	0	0	0	0	0	0	0	0	0	0	0	0	0	0	0	0	0	0	0	0	0	0	0	0	0	0	0	0	0	0
ASV367	TTTATCTGCAGGAATTGCTCATGGAGGAGCATCAGTAGATTTAGCAATTTTTTCCCTTCATTTAGCAGGAATTTCTTCTATTTTAGGAGCAGTAAATTTTATTACTACAGTAATTAATATACGATCTACAGGAATTACATTTGATCGAATACCTTTATTTGTCTGATCAGTAGTAATTACGGCTATTTTACTTTTATTATCTTTA	Arthropoda	Insecta	Diptera	Diptera sp.	Diptera sp.	Diptera sp. 53	7775	0	0	0	0	0	0	0	0	0	0	0	0	0	0	0	0	0	0	0	0	0	0	0	0	0	0	0	0	0	0	0	0	0	0	0	0	0	0	0	0	0
ASV368	TTTATCTGGAGTAATTGCTCACGGAGGAGCTTCAGTTGATTTAGCTATTTTTTCATTACATTTAGCTGGAATTTCATCAATTTTAGGGGCTGTAAATTTTATTACAACAGTTATTAATATACGAGCTACAGGTATTACATTTGATCGAATACCTTTATTTGTTTGATCAGTAGTAATTACTGCATTATTATTACTATTATCTTTA	Arthropoda	Insecta	Diptera	Diptera sp.	Diptera sp.	Diptera sp. 54	685	0	0	0	0	0	0	0	0	0	0	0	0	0	0	0	0	0	0	215	470	0	0	0	0	0	0	0	0	0	0	0	0	0	0	0	0	0	0	0	0	0
ASV369	GCTATCTTCAATTATTGCTCATGGAGGAGCTTCAGTTGATTTAGCTATTTTTTCTCTTCATTTAGCTGGAGCTTCATCAATTTTAGGAGCAGTAAATTTTATTACAACAGTAATTAATATACGATCAACAGGAATTACATTTGATCGAATACCTTTATTTGTTTGATCAGTAGTAATTACTGCTCTACTTTTATTATTATCTTTA	Arthropoda	Insecta	Diptera	Diptera sp.	Diptera sp.	Diptera sp. 56	379	0	0	0	0	0	0	0	0	0	0	0	0	0	0	0	0	0	0	0	0	0	0	0	0	0	0	0	0	0	0	0	0	0	0	0	0	0	0	0	0	0
ASV370	GCTTTCAGCAGGGATTGCTCATGGAGGTGCTTCTGTTGATTTAACTATTTTTTCTTTACATTTAGCTGGAATTTCTTCAATTTTAGGAGCAGTTAATTTTATTACAACTGTAATTAATATACGAGCTACTGGAATTTCTTTTGATCGAATACCTTTATTTGTTTGATCAGTTGTTATTACCGCTATTTTATTACTTTTATCTTTA	Arthropoda	Insecta	Diptera	Diptera sp.	Diptera sp.	Diptera sp. 57	327	0	0	0	0	0	0	0	0	0	0	0	0	0	0	0	0	0	0	0	0	0	0	0	0	0	0	0	0	0	0	0	0	0	0	0	0	0	0	0	0	0
ASV371	GTTATCATCAATTATTGCCCATGGAGGAGCTTCAGTTGATTTAGCTATTTTCTCTCTTCATTTAGCCGGAGTATCATCAATTTTAGGAGCAGTAAATTTTATTACAACAGTAATTAATATACGATCTACAGGAATTACATTTGACCGAATACCTTTATTTGTTTGATCAGTTGTAATTACTGCTTTACTTTTATTATTATCTTTA	Arthropoda	Insecta	Diptera	Diptera sp.	Diptera sp.	Diptera sp. 58	1553	0	0	0	0	0	0	0	0	0	0	0	0	0	0	0	0	0	0	0	0	0	0	0	0	0	0	0	0	0	0	0	0	0	0	0	0	0	0	0	0	0
ASV372	TCTTTCTTCTTCAATTGCCCATAGTGGGGCATCAGTAGATTTAGCAATTTTTTCCTTACATTTAGCAGGAATTTCTTCAATTTTAGGGTCTGTAAATTTTATTACAACAGCAATTAATATACGAGCAAATGGAATTACTCTTGATCGAATACCTTTATTTGTTTGATCTGTTATTATTACTACTGTTCTTTTACTTCTTTCTTTG	Arthropoda	Insecta	Diptera	Diptera sp.	Diptera sp.	Diptera sp. 59	269	0	0	0	0	0	0	0	0	0	0	0	0	0	0	0	0	0	0	0	0	0	0	0	0	0	0	0	0	0	0	0	0	0	0	0	0	0	0	0	0	0
ASV373	ATTATCATCAATTATTGCTCACGGAGGAGCTTCAGTTGATTTAGCTATTTTTTCTCTTCATTTAGCTGGAGTTTCATCTATTTTAGGGGCTGTAAATTTTATTACAACAGTAATTAATATACGATCAACAGGAATTACATTTGACCGAATGCCTTTATTTGTGTGATCAGTTGTAATTACTGCTCTTCTTTTATTACTTTCTTTG	Arthropoda	Insecta	Diptera	Diptera sp.	Diptera sp.	Diptera sp. 60	260	0	0	0	0	0	0	0	0	0	0	0	0	0	0	0	0	0	0	0	0	0	0	0	0	0	0	0	0	0	0	0	0	0	0	0	0	0	0	0	0	0
ASV375	TTTATCTTCTATTATTGCTCATGGAGGTGCATCAGTTGATTTAGCAATTTTTTCTTTACATTTAGCAGGTATTTCATCCATTTTAGGAGCTGTAAATTTTATTACTACTGTAATTAATATACGATCAACAGGAATTACATTTGATCGAATACCTTTATTTGTGTGATCAGTAGTTATTACAGCTTTATTACTACTTTTATCACTA	Arthropoda	Insecta	Diptera	Diptera sp.	Diptera sp.	Diptera sp. 62	403	0	0	0	0	0	0	0	0	0	0	0	0	0	0	0	0	0	0	0	0	0	0	0	0	0	0	0	0	0	0	0	0	0	0	0	0	0	0	168	235	0
ASV376	TCTATCATCTGGAATTGCTCATGGAGGTGCATCAGTTGATTTAGCAATTTTTTCATTACATTTAGCAGGAATTTCCTCAATTCTTGGGGCAGTAAATTTTATTACTACAGTAATTAATATACGATCAACAGGAATTACATTTGATCGAATACCTTTATTTGTGTGATCAGTAGTAATTACTGCTTTATTATTACTTTTATCATTA	Arthropoda	Insecta	Diptera	Diptera sp.	Diptera sp.	Diptera sp. 63	112	0	0	0	0	0	0	0	0	0	0	0	0	0	0	0	0	0	0	0	0	0	0	0	0	0	0	0	0	0	0	0	0	0	0	0	0	0	0	0	0	0
ASV377	TCTATCATCTAATATTGCTCATGGAGGAGCTTCTGTTGATTTAGCTATTTTTTCACTGCATTTAGCAGGAATTTCTTCAATTTTAGGAGCTGTAAATTTTATTACTACTGTAATTAATATACGATCAACAGGAATTACTTTCGATCGAATACCTTTATTTGTATGATCAGTAGCTATTACAGCTTTATTATTATTATTATCTTTA	Arthropoda	Insecta	Diptera	Diptera sp.	Diptera sp.	Diptera sp. GU675545.1	20212	0	0	0	0	0	0	0	0	0	0	0	0	0	0	0	0	0	0	0	0	0	0	0	0	0	0	0	0	0	0	0	0	0	0	0	0	0	0	0	0	0
ASV378	TCTATCTTCAAGAATTGCTCATAGAGGGGCTTCTGTAGATTTAGCAATTTTTTCTCTTCATTTAGCAGGAATCTCTTCTATTCTTGGAGCTGTAAATTTTATTACTACAATTATTAATATACGGTCTTCAGGAATTACATTTGATCGAATACCTTTATTTGTTTGATCAGTAGGAATTACAGCCGTATTACTTCTCCTTTCATTA	Arthropoda	Insecta	Diptera	Diptera sp.	Diptera sp.	Diptera sp. JF872591.1	3226	0	0	0	0	0	0	0	0	0	0	0	0	0	0	0	0	0	0	0	0	0	0	0	0	0	0	0	0	0	0	0	0	0	0	0	0	0	0	0	0	0
ASV379	TTTATCAAGATTAATTTCTCATGGAGGCCCTTCTGTTGATTTGGCTATTTTTTCTCTTCATTTAGCCGGTATTTCTTCAATTTTAGGAGCTGTAAATTTTATTACAACTATTATTAATATACGATCAGTTGGAATTACATTTGAACGAATACCTTTATTTGTTTGATCTGTATTAATTACAGCAGTTCTTCTTCTTCTTTCATTG	Arthropoda	Insecta	Diptera	Diptera sp.	Diptera sp.	Diptera sp. JN298822.1	1004397	2583	3790	2758	29	833	10	3317	3423	5882	4	8196	4	2	183	0	0	1199	9	0	3	0	38	100	0	0	0	24665	123	1866	58	2126	0	0	54	10012	0	3794	5	65735	58807	5042
ASV380	ACTCTCTTCTAGTATTGCTCATAGTGGAGCCTCAGTTGATTTAGCAATTTTTTCTCTTCATTTAGCAGGAATTTCTTCTATTTTAGGAGCCGTAAATTTTATTACAACAATTATTAATATACGATCATCAGGAATTACTTTCGATCGAATACCTTTATTTGTTTGATCAGTAGGAATTACAGCTTTATTACTTCTTTTATCATTA	Arthropoda	Insecta	Diptera	Diptera sp.	Diptera sp.	Diptera sp. JN298847.1	2332	0	0	0	0	0	0	0	0	0	0	0	0	0	0	0	0	0	0	0	0	0	0	0	0	0	0	0	0	0	0	0	0	0	0	0	0	0	0	0	0	0
ASV381	GCTATCTTCTGGAATTGCTCATGGAGGAGCTTCAGTTGATTTAGCTATTTTTTCCTTACATTTAGCAGGAATTTCTTCAATTTTAGGAGCAGTAAATTTTATTACAACAGTAATTAATATGCGTTCTACAGGAATTACTTTTGATCGAATACCTTTATTCGTATGATCTGTAGTAATTACAGCTCTTTTATTGCTTTTATCTTTA	Arthropoda	Insecta	Diptera	Diptera sp.	Diptera sp.	Diptera sp. JN298902.1	49306	0	0	6198	0	0	0	0	0	0	0	0	0	0	0	0	0	2640	0	0	0	0	0	0	0	0	0	177	0	0	0	0	0	0	0	0	0	0	0	0	0	6709
ASV382	ACTGTCATCAGGTATTGCACATGGAGGAGCATCTGTAGACTTAGCTATTTTTTCTTTACATTTAGCAGGAATCTCCTCAATTTTAGGGGCTGTAAATTTTATTACAACAGTTATTAATATACGATCAACAGGTATCACATTTGATCGAATACCTTTATTTGTTTGATCTGTTGTAATTACAGCTTTATTATTATTATTATCTCTG	Arthropoda	Insecta	Diptera	Diptera sp.	Diptera sp.	Diptera sp. JN298917.1	15517	0	3	0	0	0	0	1	7	0	1	4	0	0	88	0	14	5	98	1	0	0	0	162	0	0	0	7	82	0	7	0	4	0	18	27	0	0	0	0	0	0
ASV383	ACTATCTTCAATTATTGCACATACTGGATCTTCGGTTGATTTTTCAATTTTTTCTCTTCATATTGCAGGAATCTCATCAATTTTAGGGGCTATTAATTTTATTTCAACAATACTTAATATAAAAATTAAATTTTTAAATTTTGATCAAATTTCTTTATTTACATGATCAGTATTAATTACAGCAGTCCTTTTATTACTTTCTTTA	Arthropoda	Insecta	Diptera	Diptera sp.	Diptera sp.	Diptera sp. JN298922.1	39124	0	0	0	0	0	0	0	0	0	0	0	0	0	0	0	0	0	0	0	0	0	0	0	0	0	0	0	0	0	0	0	0	0	0	0	0	0	0	0	0	0
ASV384	TTTATCATCAATTATTGCACATGGAGGAGCTTCAGTTGATTTAGCTATTTTTTCTTTACATTTAGCTGGAGTATCATCAATTTTAGGAGCAGTAAATTTTATTACTACAGTAATTAATATACGATCTACAGGAATTACATTTGATCGAATACCTTTATTTGTTTGATCAGTAGTAATTACAGCTTTACTTTTATTATTATCTTTA	Arthropoda	Insecta	Diptera	Diptera sp.	Diptera sp.	Diptera sp. JN298933.1	6615	0	0	0	0	0	0	0	0	0	0	0	0	0	0	0	0	0	0	0	0	0	0	0	0	0	0	0	0	0	59	2269	0	0	0	0	0	0	0	0	0	0
ASV385	GCTTTCTTCTAGAATTGCTCATAGAGGAGCTTCTGTTGACTTAGCAATTTTCTCTTTACATCTTGCTGGAATTTCATCAATTTTAGGAGCTGTAAATTTTATTACTACAATTATTAATATACGATCATCAGGAATTACATTTGATCGTATACCATTATTTGTTTGATCAGTAGGAATTACCGCTTTATTACTATTACTTTCATTA	Arthropoda	Insecta	Diptera	Diptera sp.	Diptera sp.	Diptera sp. JN298941.1	2307	0	0	0	0	0	0	0	0	0	0	0	0	0	0	0	0	0	0	0	0	0	0	0	0	0	0	0	0	502	0	0	0	0	0	0	0	0	0	0	0	0
ASV386	TTTATCATCAATTATCGCGCATGGAGGTGCTTCAGTTGATTTAGCTATTTTTTCTTTACATTTAGCTGGAGTATCCTCAATTTTAGGGGCAGTTAATTTTATTACTACAGTAATTAATATACGATCTACAGGAATCACTTTTGACCGAATACCTTTATTTGTGTGATCAGTAGTAATTACTGCTTTACTTTTATTACTATCTTTA	Arthropoda	Insecta	Diptera	Diptera sp.	Diptera sp.	Diptera sp. JN298946.1	225	0	0	0	0	0	0	0	0	0	0	0	0	0	0	0	0	0	0	0	0	0	0	0	0	0	0	0	0	0	0	0	0	0	0	0	0	0	0	0	0	0
ASV387	TTTATCATCAGGAATTGCTCATGGCGGAGCTTCAGTTGATCTGGCAATTTTTTCTCTTCATTTAGCTGGAATTTCTTCTATTTTAGGAGCAGTAAATTTCATTACCACTGTAATTAATATACGTTCAACAGGTATCACCTTTGATCGAATACCTTTATTTGTATGAGCTGTAGTAATTACTGCATTATTATTACTTTTACCACTT	Arthropoda	Insecta	Diptera	Diptera sp.	Diptera sp.	Diptera sp. nr JN298715.1	607	0	0	0	0	0	0	0	0	0	0	0	0	0	0	0	0	0	0	0	0	0	0	0	0	0	0	0	0	0	0	0	0	0	0	0	0	0	0	0	0	0
ASV388	GCTATCGTCAATTATTGCTCATGGAGGTGCTTCAGTTGATTTAGCTATTTTTTCACTTCATTTAGCTGGAGTATCATCAATTTTAGGAGCAGTAAATTTTATTACAACAGTAATTAATATACGATCAACAGGAATTACATTTGACCGAATACCATTATTTGTTTGATCAGTTGTAATTACTGCTTTATTATTATTATTATCTTTA	Arthropoda	Insecta	Diptera	Diptera sp.	Diptera sp.	Diptera sp. nr JN298945.1	332	0	0	0	0	0	0	0	0	0	0	0	0	0	0	0	0	0	0	0	0	0	0	0	0	0	0	0	0	0	0	0	0	332	0	0	0	0	0	0	0	0
ASV389	ACTATCATCTAATATTGCTCACGGAGGAGCTTCTGTAGATTTAGCTATTTTTTCATTACATTTAGCAGGAATTTCTTCAATTTTAGGAGCTGTAAATTTTATTACTACTGTAATTAATATACGATCTACAGGAATTACTTTTGATCGAATACCATTATTTGTTTGATCAGTAGTAATTACAGCCTTATTATTACTGCTATCACTA	Arthropoda	Insecta	Diptera	Diptera sp.	Diptera sp.	Diptera sp. nr JN298984.1	17681	0	0	0	0	0	0	0	0	0	0	0	0	0	0	0	0	0	0	0	0	0	0	0	0	0	0	0	0	0	0	0	0	0	0	0	0	0	0	0	0	0
ASV390	TATCTGCCGGAATTGCCCATGGAGGTGCTTCAGTAGATTTAGCTATTTTTTCCCTCCACTTAGCCGGTATTTCATCAATTTTAGGAGCAGTAAATTTTATTACAACAGTTATTAATATACGATCAACAGGAATTTCGTTTGACCGAATACCTTTATTTGTATGATCTGTAGTAATTACTGCTATTTTATTACTTCTTTCTCTT	Arthropoda	Insecta	Diptera	Dolichopodidae	Dolichopodidae sp.	Dolichopodidae sp. 1	19229	0	0	0	0	0	0	0	0	0	0	0	0	0	0	0	0	0	0	0	0	0	0	0	0	0	0	0	0	0	0	0	0	0	0	0	0	0	0	0	0	0
ASV391	TCTATCAGCAGGAATTGCTCATGGAGGAGCATCAGTTGACTTAGCAATTTTCTCCCTTCATTTAGCTGGTATTTCATCTATTTTAGGAGCAGTAAATTTTATTACAACAGTAATTAATATACGATCCACAGGTATTTCATTTGATCGAATACCCTTATTTGTTTGATCAGTAGTAATTACAGCCGTACTTCTTTTATTATCATTA	Arthropoda	Insecta	Diptera	Dolichopodidae	Dolichopodidae sp.	Dolichopodidae sp. 2	18106	0	0	0	0	0	0	0	0	0	0	0	0	0	0	0	0	0	0	0	0	0	0	0	0	0	0	0	0	0	0	0	0	0	0	0	0	0	0	0	0	0
ASV392	CCTATCTTCTGGTATTGCACATGGTGGTGCTTCAGTTGATTTAGCTATTTTCTCTTTACACTTAGCCGGAATTTCTTCAATTTTAGGGGCAGTAAATTTTATCACAACAGTAATTAATATACGATCTACAGGAATTACATTAGACCGAATACCTTTATTTGTTTGATCAGTAGTAATTACTGCTTTATTGCTTCTCCTATCTTTA	Arthropoda	Insecta	Diptera	Drosophilidae	Drosophila	Drosophila buzzatii/koepferae	40538	633	951	0	0	0	5	0	0	2	0	0	0	0	0	0	3	0	167	0	4	10	76	56	0	0	0	64	236	0	14	167	0	62	0	134	0	0	0	0	0	0
ASV393	TTTATCTTCAGGAATTGCCCATAGAGGAGCTTCAGTTGATTTAGCTATTTTTTCTCTTCATTTAGCAGGAATTTCATCTATTTTAGGAGCTGTAAATTTTATTACAACTGTAATTAATATACGATCAACAGGAATTACTCTAGATCGAATACCTTTATTTGTTTGATCTGTTGTAATTACAGCTTTATTATTATTATTATCTTTA	Arthropoda	Insecta	Diptera	Drosophilidae	Drosophila	Drosophila mediostriata	126542	0	0	0	0	0	0	0	0	0	0	0	0	0	7	0	0	0	0	0	0	0	0	0	0	0	0	0	0	0	0	0	0	38	0	0	0	0	0	0	0	0
ASV395	TCTTTCCGGTAGAATTGCCCATGGGGGAGCTTCAGTTGACTTAGCCATCTTCTCCCTTCATTTAGCTGGAATTTCTTCAATTCTAGGAGCAGTAAATTTTATTACAACAGTAATTAATATACGAGCCCCAGGAATCTCCTTTGATCGAATACCTCTATTTGTCTGATCAGTAGTAATTACTGCTCTACTTTTATTATTATCCCTA	Arthropoda	Insecta	Diptera	Drosophilidae	Drosophilidae sp.	Drosophilidae sp. 1	4634	0	0	0	0	0	0	0	0	0	0	0	0	0	0	0	0	0	0	0	0	0	0	0	0	0	0	0	0	0	0	0	0	0	0	0	0	0	0	0	0	0
ASV396	TTTATCCTCAGGAATTGCCCATAGAGGTGCTTCAGTCGATTTAGCTATTTTTTCTCTTCACCTTGCAGGTATTTCTTCAATTCTAGGGGCTGTTAATTTCATTACAACAGTAATTAATATACGATCTCCTGGGATTTCATTAGACCGAATACCTTTATTTGTTTGATCAGTTGTTATTACAGCTTTACTACTTCTTCTTTCTCTC	Arthropoda	Insecta	Diptera	Drosophilidae	Drosophilidae sp.	Drosophilidae sp. 2	7938	0	0	0	0	0	0	0	0	0	0	0	0	0	0	4	0	0	0	0	0	0	0	0	0	0	0	0	0	0	0	0	0	0	0	0	0	0	0	0	0	0
ASV397	ACTTTCTTCTGGTATTGCTCATGGAGGAGCTTCAGTAGATTTAGCAATTTTTTCTCTTCATTTAGCTGGAATTTCATCAATTTTAGGAGCAGTAAATTTTATTACAACAGTAATTAATATACGATCAACAGGTATTTCTTTTGATCGAATGCCTTTATTTGTCTGATCAGTAGTAATTACTGCATTATTATTATTATTATCTTTA	Arthropoda	Insecta	Diptera	Drosophilidae	Drosophilidae sp.	Drosophilidae sp. 3	26778	0	0	0	0	0	0	0	0	0	0	0	0	0	0	0	0	0	0	0	0	0	0	0	0	0	0	0	0	0	0	0	0	0	0	0	0	0	0	0	0	0
ASV398	TTTATCATCAGGAATTGCTCATGGAGGAGCTTCTGTTGATTTAGCAATTTTTTCTTTACATTTAGCAGGTATTTCTTCAATTTTAGGGGCTGTAAATTTTATTACTACTGTAATTAATATACGATCATCAGGAATTACTTTAGATCGAATACCTTTATTTGTATGATCAGTAGTAATTACAGCGTTGTTATTACTTTTATCTTTA	Arthropoda	Insecta	Diptera	Drosophilidae	Scaptomyza	Scaptomyza australis	100137	0	0	0	0	1	0	0	1	0	0	0	0	0	0	0	4	0	0	0	0	0	0	0	0	0	0	363	0	0	1	15	0	146	7	8	0	0	0	0	0	0
ASV399	CTTATCAAGTTTAATTTCTCATGGGGGTCCTTCCGTTGATTTAGCAATTTTTTCTTTACATTTAGCTGGGATTTCTTCTATTTTGGGGGCTGTAAATTTTATTACTACTGTAATTAATATACGATCATCAGGAATTACTTTAGATCGAATACCTTTATTTGTATGATCAGTAGTAATTACAGCGTTGTTATTACTTTTATCTTTA	Arthropoda	Insecta	Diptera	Drosophilidae	Scaptomyza	Scaptomyza sp. 1	49	0	0	0	0	0	0	0	0	0	0	0	0	0	0	0	0	0	0	0	0	0	0	0	0	0	0	0	49	0	0	0	0	0	0	0	0	0	0	0	0	0
ASV400	TTTATCTGGAGGAGCTGCTCACGGAGGAGCATCTGTTGATTTAGCTATTTTTTCATTACATTTAGCAGGAATTTCTTCAATTTTAGGAGCTGTAAATTTTATTACAACAGTAATTAATATACGAGCTACTGGAATTAGTTTTGATCGAATACCATTATTTGTGTGATCTGTAGTAATTACTGCTTTATTACTACTACTATCTTTA	Arthropoda	Insecta	Diptera	Ephydridae	Allotrichoma	Allotrichoma sp.	15706	0	0	0	0	0	0	0	0	0	0	0	0	0	0	0	0	0	0	0	0	0	0	0	0	0	0	0	0	0	0	0	0	0	0	0	0	0	0	0	0	0
ASV401	TTTATCAGGAGGAATTGCTCATGGAGGAGCATCAGTTGATTTAGCTATTTTTTCTCTGCATTTAGCGGGAATTTCTTCTATTTTAGGAGCAGTAAATTTTATTACTACAGTAATTAATATACGAGCTACAGGAATTACATTTGATCGAATACCTTTATTTGTATGATCTGTAGTAATTACAGCATTATTATTACTTTTATCTTTA	Arthropoda	Insecta	Diptera	Ephydridae	Ephydridae sp.	Ephydridae sp. 1	12489	0	0	7106	0	0	0	0	0	0	0	0	0	0	0	0	0	0	0	0	0	0	0	0	0	0	0	0	0	0	0	0	0	0	0	0	0	0	0	0	0	0
ASV402	CCTATCTGGAGGAATTGCACATGGAGGTGCTTCAGTAGATCTAGCTATTTTTTCTTTACATTTAGCTGGAATTTCTTCTATTTTAGGAGCAGTAAATTTTATTACAACTGTAATTAATATACGAGCTACAGGAATTACATTTGATCGAATACCTTTATTTGTTTGATCTGTTGTAATTACAGCTTTATTATTATTACTTTCATTA	Arthropoda	Insecta	Diptera	Ephydridae	Ephydridae sp.	Ephydridae sp. 2	11536	0	0	0	0	0	0	0	0	0	0	0	0	0	0	0	0	0	0	0	0	0	0	0	0	0	0	0	0	0	0	0	0	0	0	0	0	0	0	0	0	0
ASV403	TCTATCTGGAGGAATTGCTCATGGAGGAGCATCAGTTGACTTAGCTATTTTTTCTTTACATTTAGCAGGAATTTCTTCTATTTTAGGAGCAGTAAATTTTATTACAACAGTAATTAATATACGAGCTACAGGAATTACATTTGATCGAATACCTTTATTTGTTTGATCTGTTGTAATTACTGCTCTACTATTATTACTTTCTTTA	Arthropoda	Insecta	Diptera	Ephydridae	Scatella	Scatella sp. MG078102.1	32519	0	0	0	0	0	0	0	0	0	0	0	0	0	0	0	0	0	0	0	0	0	0	0	0	0	0	0	0	0	0	0	0	0	0	0	0	0	0	0	0	0
ASV404	TCTATCTGCAGGAATTGCCCATGGAGGAGCATCAGTAGATTTAGCAATTTTTTCCCTTCATTTAGCAGGAATTTCTTCTATCTTAGGTGCAGTAAATTTTATTACTACAGTAATTAATATGCGATCTACAGGAATTACATTTGACCGAATACCTTTATTTGTTTGATCAGTAGTAATTACAGCTATTTTACTTTTGTTATCTTTA	Arthropoda	Insecta	Diptera	Heleomyzidae	Heleomyzidae sp.	Heleomyzidae sp.	23189	0	0	0	0	0	0	0	0	0	0	0	0	0	0	0	0	0	0	0	0	0	0	0	0	0	0	0	0	0	0	0	0	0	0	0	0	0	0	0	0	0
ASV405	TTTATCAGCAGGTATTGCTCATGCTGGAGCATCAGTTGATCTTGCTATTTTTTCTTTACATTTAGCAGGAATTTCTTCTATTTTAGGAGCAGTTAATTTTATTACAACTGTTATTAATATACGATCTACAGGAATTACATTTGATCGAATACCTTTATTTGTTTGAGCTGTTGTTATTACTGCAGTTTTATTATTATTATCATTA	Arthropoda	Insecta	Diptera	Limoniidae	Gonomyia	Gonomyia skusei	136	0	0	0	0	0	0	0	0	0	0	0	0	0	0	0	0	0	0	0	0	0	0	0	0	0	0	0	0	0	0	0	0	0	0	0	0	0	0	0	0	0
ASV406	TTTATCTGCAGGAATTGCTCATGCGGGGGCATCAGTTGATTTAGCAATTTTTTCTCTACATTTAGCTGGGGTTTCATCAATTTTAGGAGCAGTAAATTTTATTACAACAGTAATTAATATACGATCAACTGGAATTACTTTTGATCGTATACCTTTATTCGTGTGAGCTGTTGTAATTACAGCAGTTTTATTACTTTTATCTTTA	Arthropoda	Insecta	Diptera	Limoniidae	Symplecta	Symplecta pilipes	71	0	0	0	0	0	0	0	0	0	0	0	0	0	0	0	0	0	0	0	0	0	0	0	0	0	0	0	0	0	0	0	0	0	0	0	0	0	0	0	0	0
ASV408	TTTATCCTCTGGAATTGCTCATGCTGGAGCATCTGTTGATTTAGCAATTTTTTCATTACATTTAGCTGGAATTTCTTCTATTTTAGGAGCTGTTAATTTTATTACAACTGTTATTAATATACGTTCATCAGGAATAAGTTTTGATCGAATACCTTTATTTGTTTGATCTGTAGTAATTACTGCTTTATTATTATTATTATCTTTA	Arthropoda	Insecta	Diptera	Lonchopteridae	Lonchoptera	Lonchoptera bifurcata/uniseta	775	0	0	0	0	0	0	0	0	0	0	0	0	0	0	0	0	0	0	0	0	0	0	0	0	0	0	0	0	0	0	0	0	0	0	0	0	0	0	0	0	0
ASV409	ATTATCTTCTAATATTGCTCATGGTGGAGCTTCTGTTGATTTAGCTATTTTTTCTCTTCATTTAGCAGGGATTTCATCTATTTTAGGAGCTGTAAATTTTATTACTACAGTAATTAATATACGATCAGTAGGAATTACTTTTGATCGAATACCTTTATTTGTTTGATCAGTAGTAATTACAGCTTTATTATTATTATCTCTA	Arthropoda	Insecta	Diptera	Muscidae	Anthomyia	Anthomyia nr xanthopyga	164	0	0	0	0	0	0	0	0	0	0	0	0	0	0	0	0	0	0	0	0	0	0	0	0	0	0	0	0	0	0	0	0	0	0	0	0	0	0	0	0	0
ASV410	TCTATCATCTAATATTGCTCATGGAGGAGCTTCTGTTGATTTAGCTATTTTTTCACTACATTTAGCAGGAATTTCTTCAATTTTAGGAGCTGTAAATTTTATTACTACTGTAATTAATATACGATCAACAGGAATTACTTTCGATCGAATACCTTTATTTGTATGATCAGTAGCTATTACAGCTTTATTATTATTATTATCTTTA	Arthropoda	Insecta	Diptera	Muscidae	Coenosia	Coenosia attenuata	85883	0	0	0	0	0	0	0	0	0	0	0	0	0	0	0	0	0	0	0	0	0	0	0	0	0	0	0	0	0	0	0	0	0	0	0	0	0	0	0	0	0
ASV411	TTTATCTTCTAATATTGCTCATAGAGGAGCTTCTGTAGATTTAGCAATTTTTTCTTTACATTTAGCTGGAATTTCATCTATTTTAGGAGCAGTAAATTTTATTACAACTATTATTAATATACGATCAAAAGGAATTTTATTTGATCGAATACCTTTATTTGTATGATCAGTAGCAATTACTGCTTTACTATTACTTTTATCATTA	Arthropoda	Insecta	Diptera	Muscidae	Helina	Helina sp. MK265335.1	1409	0	0	0	0	0	0	0	0	22	0	0	0	0	8	0	0	0	5	0	0	0	0	0	0	0	0	0	0	5	1	3	0	0	0	0	0	155	0	139	129	0
ASV412	TTTATCTGCTAATACTGCTCATAGCGGGCCTTCTGTTGATTTAGCCATTTTTTCATTACATTTAGCCGGAATTTCTTCTATTTTAGGGGCTGTAAATTTTATTACAACTGTAATAAACATACGATCTGCTGGAATTTCATTTGACCGAATACCTTTATTTGTATGATCTGTTGTTATTACAGCCTTATTACTACTTTTATCTTTA	Arthropoda	Insecta	Diptera	Muscidae	Muscidae	Muscidae sp. 1	1453	0	0	0	0	0	0	0	0	0	694	0	0	0	0	0	0	0	0	0	0	0	0	0	0	0	0	0	0	0	0	0	0	0	0	0	0	0	0	0	0	0
ASV413	ACTTTCATCTAATATTGCTCATGGCGGATCTTCAGTAGATTTAGCTATTTTTAGCTTACATTTAGCTGGAATTTCTTCAATTTTAGGAGCTGTAAATTTTATTACAACGGTAATTAACATACGACCCGCTGGAATAACTTTAGATCGAATGCCTTTATTTGTTTGATCAGTTGTTATTACAGCTATTTTATTACTTTTATCTTTA	Arthropoda	Insecta	Diptera	Muscidae	Muscidae sp.	Muscidae sp. 2	5219	0	0	0	0	0	0	0	0	0	0	0	0	0	0	0	0	0	0	0	0	0	0	0	0	0	0	0	0	0	0	0	0	0	0	0	0	0	0	0	0	0
ASV414	TTTATCATCTAATATTGCCCATGGAGGAGCTTCTGTTGATTTAGCTATTTTTAGCCTTCATTTAGCCGGGATTTCTTCAATTTTAGGAGCCGTTAACTTTATTACTACTGTAATTAATATACGATCAACAGGAATAACCTTTGATCGAATACCATTATTTGTATGATCAGTAGCTATTACTGCCTTACTCCTTCTATTATCTTTA	Arthropoda	Insecta	Diptera	Muscidae	Muscidae sp.	Muscidae sp. 3	2069	0	0	0	0	0	0	0	0	0	0	0	0	0	0	0	0	0	0	0	0	0	0	0	0	0	0	0	0	0	0	0	0	0	0	0	0	0	0	0	0	0
ASV415	TTTATCTTCAACCATTGCACATGGAGGAGCTTCTGTAGATTTAGCTATTTTTTCTTTACACTTAGCTGGAATTTCATCAATTTTAGGGGCTGTAAATTTTATTACTACTGTTATTAATATACGAGCAACTGGAATTACTTTTGACCGAATACCTTTATTTGTTTGATCTGTAGTTATTACTGCTTTATTACTTTTATTATCTTTA	Arthropoda	Insecta	Diptera	Muscidae	Muscidae sp.	Muscidae sp. 4	537	0	0	0	0	0	0	0	0	0	0	0	0	0	0	0	0	0	0	0	0	0	0	0	0	0	0	0	0	0	0	0	0	0	0	0	0	0	0	0	0	0
ASV416	CTTGTCATCTAATATTGCACACAGAGGAGCTTCTGTAGATTTAGCTATTTTTTCCCTTCATTTAGCTGGAATTTCATCAATTTTAGGAGCTGTAAATTTTATTACTACAGTAATTAATATACGTTCAACAGGAATTACATTTGATCGTATACCCTTATTTGTATGATCAGTAGTTATTACAGCTCTTCTTCTATTATTATCCTTG	Arthropoda	Insecta	Diptera	Muscidae	Muscidae sp.	Muscidae sp. MK265352.1	136370	0	0	0	0	0	0	0	0	0	0	0	0	0	0	0	0	0	0	0	0	0	0	0	0	0	0	0	0	0	0	0	0	47	0	0	0	0	0	0	0	0
ASV417	TTTATCTTCTATCATTGCCCATGGAGGTGCATCAGTTGATTTAGCTATTTTTTCTTTACATTTAGCAGGTATTTCATCTATTTTAGGAGCTGTAAATTTTATTACAACTGTAATTAATATACGATCAACAGGAATTACATTTGATCGAATACCTTTATTTGTGTGATCAGTAGTAATTACAGCTTTATTACTACTTTTATCATTA	Arthropoda	Insecta	Diptera	Muscidae	Spilogona	Spilogona sp.	298	0	0	0	0	0	0	0	0	0	0	0	0	0	0	0	0	0	0	0	0	0	0	0	0	0	0	0	0	0	0	0	0	0	0	0	0	0	0	139	159	0
ASV418	TCTGTCCTCTATTATTGCTCATGGAGGAGCTTCTGTAGATCTAGCTATTTTTTCTTTACATTTAGCTGGAATCTCTTCAATTTTAGGAGCTGTAAATTTTATTACTACTGTAATTAATATACGAGCTGTTGGGATTACTTTTGATCGAATACCTTTATTTGTATGATCTGTTGTAATTACTGCTTTACTTTTATTATTATCATTA	Arthropoda	Insecta	Diptera	Muscidae	Thricops	Thricops sp.	9126	0	0	0	0	0	0	0	0	0	0	0	0	0	0	0	0	0	0	0	0	0	0	0	0	0	0	0	0	0	0	0	0	9126	0	0	0	0	0	0	0	0
ASV419	ACTTTCATCAAGAATTGCACATAGAGGGGCATCTGTCGATTTAGCAATTTTTTCTCTTCATTTAGCTGGAGTTTCTTCAATTTTAGGAGCTGTAAATTTTATTACTACAATTATTAATATACGATCAAATGGTATTACATTTGATCGAATACCTTTATTTGTTTGATCAATTGGTATTACTGCTATTCTTCTTTTATTATCTTTA	Arthropoda	Insecta	Diptera	Phoridae	Megaselia	Megaselia halterata	431	0	0	0	0	0	0	0	0	0	0	0	0	0	0	0	0	0	0	0	0	0	0	0	0	0	0	0	0	0	0	0	0	0	0	0	0	0	0	0	0	0
ASV420	CCTTTCTTCTAGTATTGCTCATAGAGGAGCTTCTGTAGATTTAGCAATTTTCTCTTTACATCTTGCAGGTATTTCATCTATTTTAGGAGCTGTAAATTTTATTACTACAATTATTAATATACGATCTTCTGGAATTACTTTTGATCGAATACCTTTATTTGTATGATCAGTAGGAATTACTGCTTTATTATTATTACTTTCATTA	Arthropoda	Insecta	Diptera	Phoridae	Megaselia	Megaselia sp. 1	41552	0	0	0	0	0	0	0	0	0	0	0	0	0	0	0	0	0	0	0	0	0	0	0	0	0	0	0	0	3309	0	0	0	22442	0	385	0	0	0	0	0	0
ASV421	TTTATCATCTAGTATTGCTCATAGAGGAGCTTCTGTAGATTTAGCTATTTTTTCATTACATTTAGCAGGAATTTCTTCAATTTTAGGAGCTGTAAATTTTATTACTACAATTATTAATATACGATCTTCTGGAATTACATTTGATCGAATACCATTATTTGTATGATCTGTAGGAATTACAGCCTTATTACTTTTATTATCTCTT	Arthropoda	Insecta	Diptera	Phoridae	Megaselia	Megaselia sp. 2	8651	0	0	0	0	0	0	0	0	0	0	0	0	0	0	0	0	0	0	0	0	0	0	0	0	0	0	0	0	0	0	0	0	0	0	0	0	0	0	0	0	0
ASV422	TCTATCTTCTAGAATCGCTCATAGAGGTGCTTCAGTTGATTTAGCTATTTTTTCACTTCACCTTGCAGGTATTTCTTCAATTTTAGGTGCAGTAAATTTTATTACTACAATTATTAATATACGATCTTCAGGAATCACATTTGATCGAATACCATTATTTGTTTGATCTGTTGGAATTACAGCTCTTCTTTTATTACTTTCTCTT	Arthropoda	Insecta	Diptera	Phoridae	Megaselia	Megaselia spiracularis	785	0	0	0	0	0	0	0	0	0	0	0	0	0	0	0	0	0	0	0	0	0	0	0	0	0	0	0	0	0	0	0	0	0	0	0	0	0	0	0	0	0
ASV423	TTTATCATCAAGAATTGCTCATAGTGGAGCTTCTGTTGATTTAGCTATTTTTTCACTTCATTTAGCTGGTATTTCTTCAATTTTAGGAGCTGTTAATTTTATTACTACAATTATTAATATACGATCTTCAGGAATTACATTTGATCGAATACCTTTATTTGTTTGATCTGTAGGAATTACAGCCTTATTACTTTTACTTTCTCTA	Arthropoda	Insecta	Diptera	Phoridae	Phoridae sp.	Phoridae sp. 1	19523	0	0	0	0	0	0	0	0	0	0	5517	0	0	0	0	0	0	0	0	0	0	0	0	0	0	0	0	0	0	0	0	0	0	0	0	0	1	0	0	0	0
ASV424	TCTTTCTTCTAGTATCGCTCATAGTGGAGCTTCTGTAGATTTAGCAATTTTTTCATTACATTTAGCTGGAATTTCTTCCATTTTAGGAGCTGTAAACTTTATTACAACAATTATTAATATACGATCTTCTGGAATTACTTTTGATCGAATACCTTTATTTGTTTGATCTGTAGGAATTACTGCTCTTTTATTATTATTATCATTA	Arthropoda	Insecta	Diptera	Phoridae	Phoridae sp.	Phoridae sp. 2	221704	0	0	0	0	0	0	0	0	0	0	0	0	0	0	0	0	0	0	0	0	0	0	0	0	0	0	0	0	0	0	0	0	92325	0	15298	0	0	0	0	0	0
ASV425	CCTCTCTTCCAGAATTGCTCATAGAGGAGCTTCAGTAGATTTAGCAATTTTTTCTCTTCATTTAGCTGGAATTTCAAGAATTTTAGGAGCTGTAAATTTTATTACAACTATTATTAATATACGATCATCAGGAATCTCTTTTGATCGAATACCTTTATTTGTTTGATCTGTAGGAATTACTGCTCTTCTACTATTACTTTCTTTA	Arthropoda	Insecta	Diptera	Phoridae	Phoridae sp.	Phoridae sp. 3	8265	0	0	0	0	0	0	0	0	0	0	0	0	0	0	0	0	0	0	0	0	0	0	0	0	0	0	0	0	8265	0	0	0	0	0	0	0	0	0	0	0	0
ASV426	CTTATCTTCAAATATTGCTCATGGAGGAGCATCAGTTGATCTAGCAATTTTTTCATTACATTTAGCTGGAATTTCATCTATTTTAGGAGCTGTAAATTTTATTACTACAGTAATCAATATACGATCTAGAGGAATATCATTTGATCGAATACCTTTATTTGTATGAGCTGTAGTAATTACAGCTTTATTACTACTATTATCATTA	Arthropoda	Insecta	Diptera	Pipunculidae	Tomosvaryella	Tomosvaryella sp. 1	15767	0	0	0	0	0	0	0	0	0	0	0	0	0	0	0	0	0	0	0	0	0	0	0	0	0	0	0	0	0	0	0	0	0	0	11572	0	0	0	0	0	0
ASV428	TCTATCTAGTTTAATTTCTCACGGAGGGCCCTCAGTTGATTTAGCAATTTTTTCATTACATTTGGCCGGGATTTCTTCAATTTTAGGGGCTGTAAATTTTATTACTACAATTATTAATATACGATCTATTGGTATTACATTTGAACGAATGCCTTTATTTGTTTGATCTGTTTTAATTACAGCAGTATTATTACTTTTATCTCTA	Arthropoda	Insecta	Diptera	Psychodidae	Psychoda	Psychoda albipennis	1094	0	0	0	0	0	0	0	0	0	0	0	0	0	0	0	0	0	0	0	0	0	0	0	0	0	0	1018	3	0	0	0	0	0	73	0	0	0	0	0	0	0
ASV429	TTTATCAAGTTTAATTTCTCATGGGGGTCCTTCCGTTGATTTAGCAATTTTTTCTTTACATTTAGCTGGGATTTCTTCTATTTTGGGGGCTGTAAATTTTATTACTACTATTATTAATATACGATCTATTGGTATTACATTTGAACGAATACCTTTATTTGTTTGATCAGTTCTTATTACAGCGGTTCTTCTTCTTCTTTCATTA	Arthropoda	Insecta	Diptera	Psychodidae	Psychoda	Psychoda sp. JF872464.1	679256	2	0	0	0	0	0	4942	5791	0	0	3	0	0	0	0	0	0	0	0	0	0	0	59	0	0	0	0	0	0	0	14	0	0	30	0	0	6021	10	0	0	0
ASV430	ACTATCATCTAATATTGCACATGGAGGAGCTTCTGTTGATTTAGCAATTTTTTCATTACATTTAGCTGGAATCTCTTCTATTTTAGGAGCTGTAAATTTTATTACAACGGTAATTAATATACGATCAACTGGAATTACATTTGATCGAATACCATTATTTGTATGATCAGTAGTAATTACAGCTTTATTATTATTATTATCATTA	Arthropoda	Insecta	Diptera	Rhiniidae	Metallea	Metallea incisuralis	279	0	0	0	0	0	0	0	0	0	0	0	0	0	0	0	0	0	0	0	0	0	0	0	0	0	0	0	0	0	0	0	0	0	0	0	0	0	0	0	0	0
ASV431	CTTATCATCTAATATTGCTCATGGAGGAGCTTCTGTTGATTTAGCAATTTTTTCTCTACATTTAGCAGGAATTTCTTCAATTTTAGGAGCAGTAAATTTCATTACAACAGTTATTAATATACGATCAACAGGAATTACATTTGATCGAATACCATTATTTGTTTGATCAGTAGTAATTACAGCTTTACTTTTATTACTTTCTTTG	Arthropoda	Insecta	Diptera	Sarcophagidae	Sarcophaga	Sarcophaga australis	1540810	0	0	0	0	0	0	0	0	0	0	0	0	0	0	0	0	0	0	0	0	0	0	0	0	0	0	0	0	0	0	0	0	0	0	0	0	0	0	0	0	0
ASV432	CTTGTCCTCAAATATCGCTCATGGAGGAGCTTCAGTTGATCTAGCCATTTTTTCTCTTCATTTAGCAGGAATCTCTTCCATTTTAGGAGCAGTAAATTTTATTACTACAGTTATTAACATACGATCAACAGGTATTACTTTTGATCGAATACCATTATTTGTATGATCCGTAGTAATTACAGCTTTACTTTTATTACTTTCTTTA	Arthropoda	Insecta	Diptera	Sarcophagidae	Sarcophaga	Sarcophaga bidentata	43497	0	0	0	0	0	0	0	0	0	0	0	0	0	0	0	0	0	0	0	0	0	0	0	0	0	0	0	0	0	0	0	0	0	0	0	0	0	0	0	0	0
ASV434	CCTATCATCAAACATCGCTCATGGAGGAGCTTCAGTTGATTTAGCTATTTTCTCTCTACACTTAGCTGGAATTTCCTCAATTTTAGGAGCAGTAAATTTTATTACTACAGTTATTAATATACGATCAACTGGTATTACATTTGATCGAATGCCTTTATTTGTGTGATCCGTGGTAATCACAGCTTTACTTTTATTACTTTCTTTA	Arthropoda	Insecta	Diptera	Sarcophagidae	Sarcophaga	Sarcophaga omikron	35565	0	0	0	0	0	0	0	0	0	0	0	0	0	0	0	0	0	0	0	0	0	0	0	0	0	0	0	0	0	0	0	0	0	0	0	0	0	0	0	0	0
ASV435	ATTATCTTCTAATATTGCTCATGGAGGAGCATCTGTTGATTTAGCTATTTTTTCCCTTCATCTCGCAGGAATCTCATCAATTTTAGGGGCAGTAAATTTTATTACTACCGTTATTAACATACGATCTTCAGGAATTACCTTTGATCGAATACCCTTATTTGTTTGATCAGTAGTAATTACTGCTCTACTACTATTACTTTCTCTA	Arthropoda	Insecta	Diptera	Sarcophagidae	Sarcophaga	Sarcophaga ruficornis	123	0	0	0	0	0	0	0	0	0	0	0	0	0	0	0	0	0	0	0	0	0	0	0	0	0	0	0	0	0	0	0	0	121	0	0	0	0	0	0	0	0
ASV436	CCTATCATCTAATATTGCTCATGGAGGAGCTTCTGTTGATTTAGCTATTTTTTCTCTTCATTTAGCAGGAATTTCTTCAATTTTAGGAGCAGTAAATTTCATTACTACAGTAATTAATATACGATCAACAGGTATTACTTTTGATCGAATACCTTTATTTGTATGATCTGTAGTAATTACAGCTTTACTTTTATTACTTTCCTTA	Arthropoda	Insecta	Diptera	Sarcophagidae	Sarcophaga	Sarcophaga sp. 1	762	0	0	0	0	0	0	0	0	0	0	0	0	0	30	0	0	0	0	0	0	0	0	0	0	0	0	0	0	5	0	0	0	0	0	15	0	0	0	0	0	0
ASV438	ATTATCATCAACAATTGCTCATTCAGGGGCCTCTGTTGATCTATCAATTTTTTCTCTTCATTTAGCAGGAATTTCTTCAATTTTAGGTGCAGTAAATTTTATTTCTACAATTATTAATATACGAGCCCCAGGAATATCTTTTGATAAATTACCTTTATTTACTTGATCTGTTTTAATTACAGCAGTTTTATTATTATTATCTTTA	Arthropoda	Insecta	Diptera	Sciaridae	Bradysia	Bradysia impatiens	2814	0	0	0	21	361	0	1105	1286	0	0	0	0	0	14	0	0	0	0	0	0	0	0	0	0	0	0	0	24	0	0	0	0	0	0	0	0	0	0	0	0	0
ASV440	TCTTTCATCAACAATTTCCCATTCAGGTGCATCAGTTGATTTATCAATCTTTTCCCTTCATTTAGCAGGTATTTCTTCTATTTTAGGGGCAGTTAATTTTATTTCAACAATTATTAATATACGGGCTCCTGGAATATCTTTTGATAAAATACCTTTATTTGTATGATCAGTATTAATTACAGCTATTCTTTTATTGTTATCATTA	Arthropoda	Insecta	Diptera	Sciaridae	Bradysia	Bradysia sp. 1	10689	0	0	185	0	0	0	239	265	197	0	0	0	0	0	0	0	0	0	0	0	0	0	0	0	0	0	0	0	0	0	0	0	0	0	0	0	0	0	0	0	0
ASV441	TTTATCATCTACACTTTCCCATTCTGGGGCCTCTGTAGACCTATCTATTTTTTCACTTCACTTAGCAGGTATTTCCTCTATTTTGGGAGCAGTAAATTTTATTTCTACAATTATCAATATACGAGCCCCGGGGATATCATTTGATAAAATACCCTTATTTGTATGATCAGTATTAATTACAGCAATTCTTTTACTATTATCTTTA	Arthropoda	Insecta	Diptera	Sciaridae	Bradysia	Bradysia sp. MZ323634.1	3878	0	0	0	0	0	0	0	0	0	0	0	0	0	0	0	0	0	0	0	0	0	0	0	0	0	0	0	0	0	0	0	0	0	0	0	0	0	0	0	0	0
ASV442	TTTATCATCAACTCTTTCTCATTCAGGGGCATCTGTTGATTTATCAATTTTTTCCCTCCATTTAGCTGGTATTTCATCAATTTTAGGGGCAGTTAATTTTATTTCAACAATTATTAATATACGAGCCCCAGGAATAATATTTGATAAAATACCTCTTTTTGTATGATCAGTATTAATTACTGCAATTCTACTACTTCTATCATTA	Arthropoda	Insecta	Diptera	Sciaridae	Corynoptera	Corynoptera concinna	4321	0	0	0	0	0	0	0	0	0	0	0	0	0	0	0	0	0	0	0	0	0	0	0	0	0	0	0	0	0	0	0	0	0	0	0	0	0	0	0	0	0
ASV443	TCTTTCATCTACTTTATCTCATTCAGGGGCTTCAGTAGATCTATCAATTTTCTCATTACACTTAGCAGGAATTTCGTCTATTCTAGGAGCTGTAAATTTTATTTCAACTATTATCAATATACGGGCCCCTGGAATATTATTTGATAAAATACCCCTATTTGTTTGATCAGTTTTAATTACTGCAATTTTACTTTTATTGTCCCTG	Arthropoda	Insecta	Diptera	Sciaridae	Corynoptera	Corynoptera perpusilla	646	0	0	0	0	0	0	0	0	0	0	0	0	0	0	0	0	0	0	0	0	0	0	0	0	0	0	0	0	0	0	0	0	0	0	0	0	0	0	0	0	0
ASV444	ATTATCCTCATCAATATATCACTCAGGAGCATCAGTAGACCTCTCAATCTTTTCACTTCACCTAGCAGGAATCTCATCAATTCTAGGAGCAGTGAACTTTATTTCAACAGTATCAAACATATCCCTATCAAATATATTATTTGATAAACTAACACTATTCGTTTGATCAGTAATAATCACAGCAGTACTACTCCTGTTATCCCTA	Arthropoda	Insecta	Diptera	Sciaridae	Cosmosciara	Cosmosciara perniciosa	87999	0	0	0	0	0	0	0	0	0	0	0	0	0	0	0	0	0	0	0	0	0	0	0	0	0	0	0	0	0	0	0	0	0	0	0	0	0	0	0	0	0
ASV445	TCTTTCATCTACTTTATCACATTCAGGAGCTTCTGTTGATTTATCAATTTTCTCATTACATTTAGCTGGGATTTCTTCTATTTTAGGTGCTGTAAATTTTATTTCAACTATTATTAACATGCGAGCTCCTGGGATATCATTTGATAAAATACCCTTATTTGTTTGGTCTGTCCTTATTACTGCAATTTTATTACTTTTATCTTTA	Arthropoda	Insecta	Diptera	Sciaridae	Leptosciarella	Leptosciarella sp.	76696	0	0	0	0	0	0	0	0	0	0	0	0	0	0	0	0	0	0	0	0	0	0	0	0	0	0	0	0	0	0	0	0	0	0	0	0	0	0	0	0	0
ASV446	CCTATCTTCTACTTTAGCTCATTCAGGGGCTTCCGTAGATTTATCTATTTTTTCTTTACATTTAGCGGGTATTTCCTCAATCTTGGGGGCAGTAAATTTTATTTCCACTATTATTAATATACGAGCCCCTGGAATATCTTTTGATAAAATACCATTATTTATTTGATCAGTTTTAATTACTGCAATTCTTCTTCTTCTATCCCTA	Arthropoda	Insecta	Diptera	Sciaridae	Lycoriella	Lycoriella sativae	1708	0	0	708	0	0	0	0	0	0	0	0	0	0	0	0	0	0	0	0	1	0	56	0	0	0	0	0	0	0	0	0	0	0	51	0	0	0	0	0	0	0
ASV447	TCTTTCTTCAACAATTGCTCATTCAGGGGCTTCAGTAGATTTGTCTATTTTTTCTCTTCATTTAGCGGGAATTTCTTCAATTTTAGGTGCCGTAAATTTTATTTCAACTATTATAAATATACGAGCCCCAGGAATATCATTTGAAAAAATGCCTTTATTTGTTTGATCAGTACTAATTACAGCAATTTTACTTTTATTGTCATTA	Arthropoda	Insecta	Diptera	Sciaridae	Pseudolycoriella	Pseudolycoriella cavatica	3369	0	0	0	0	0	0	0	0	0	0	0	0	0	0	0	0	0	0	0	0	0	0	0	0	0	0	0	0	0	0	0	0	0	0	0	0	0	0	0	0	0
ASV448	TTTATCTTCTACTTTATCTCATTCAGGAGCATCTGTAGATTTATCAATTTTTTCTTTACATTTAGCAGGGATTTCTTCAATTTTAGGAGCAGTAAATTTTATTTCTACAATTATTAATATACGAGCTCCTGGAATATCTTTTGATAAAATACCTTTATTTGTATGATCTGTATTAATTACTGCAATTTTATTATTATTATCTTTA	Arthropoda	Insecta	Diptera	Sciaridae	Sciaridae sp.	Sciaridae sp. 1	49786	0	0	0	0	0	0	0	0	0	0	0	0	0	0	0	0	0	0	0	0	0	0	0	0	0	0	0	0	0	0	0	0	0	16	0	0	0	0	0	0	0
ASV449	TTTATCTTCTACTCTTTCCCATGCAGGGGCTTCTGTTGATTTATCTATTTTTTCTTTACATTTAGCTGGTATTTCTTCAATTTTGGGTGCTGTAAATTTTATTTCTACTATTATTAATATACGAGCCCCCGGAATATCATTTGATAAAATACCTTTATTTGTTTGATCAGTACTAATTACTGCTATTTTATTATTATTATCATTA	Arthropoda	Insecta	Diptera	Sciaridae	Sciaridae sp.	Sciaridae sp. 2	9276	0	0	0	0	0	0	0	0	0	0	0	0	0	0	0	0	0	0	0	0	0	0	0	0	0	0	0	0	0	0	0	0	0	0	0	0	0	0	0	0	0
ASV450	TTTATCTTCTACTATTTCTCATTCAGGAGCATCTGTGGATTTATCAATTTTTTCTTTACATTTAGCAGGTATTTCTTCTATTTTAGGGGCGGTTAATTTTATTTCTACAATTATTAATATACGAACTCCAGGAATAAGATTTGATAAGATACCTTTATTTGTTTGATCTGTATTAATTACAGCTATTCTATTGTTGTTATCATTA	Arthropoda	Insecta	Diptera	Sciaridae	Sciaridae sp.	Sciaridae sp. 3	148436	168	240	2418	1	43	0	0	0	5	0	0	0	0	24	0	0	0	16	0	0	0	0	2	0	0	0	0	88	3251	115	4918	0	5816	0	641	0	0	0	0	0	4256
ASV451	TTTATCTTCTACTCTTTCCCATTCCGGTGCTTCTGTTGATTTATCAATTTTTTCTTTACATTTAGCTGGTATCTCTTCAATTTTGGGTGCTGTAAATTTTATTTCTACTATTATTAATATGCGAGCCCCTGGGATATCATTTGATAAAATACCTTTATTTGTTTGATCAGTACTAATTACTGCTATTTTATTATTATTATCACTA	Arthropoda	Insecta	Diptera	Sciaridae	Sciaridae sp.	Sciaridae sp. 4	14558	0	0	0	0	0	0	0	0	0	0	0	0	0	0	0	0	0	0	0	0	0	0	0	0	0	0	0	0	0	0	0	0	0	0	0	0	0	0	0	0	0
ASV452	TCTTTCTACTACAATCTCACACTCGGGGGCATCTGTAGATTTATCAATTTTTTCTTTACATTTAGCTGGAATTTCATCCATTTTAGGGGCTGTAAATTTTATTTCAACAATTATTAATATGCGAGCACCAGGAATAAGATTCGATAAAATACCTTTATTTGTATGATCTGTATTAATTACAGCTATTCTACTATTACTATCACTA	Arthropoda	Insecta	Diptera	Sciaridae	Sciaridae sp.	Sciaridae sp. 5	1437	0	0	0	0	0	0	0	0	0	0	0	0	0	0	0	0	0	0	0	0	0	0	0	0	0	0	0	0	0	0	0	0	0	0	0	0	0	0	0	0	0
ASV453	ATTATCTACTACAATTTTTCATTCTGGAGCATCTGTTGACTTATCCATCTTTTCTCTTCATTTAGCCGGAATTTCATCTATTCTAGGGGCCGTAAACTTTATTTCTACGATTATTAATATACGAGCTCCTGGAATATCTTTTGACAAAATACCTCTTTTTGTTTGATCTGTTTTAATTACTGCAATTCTTTTATTATTATCTCTA	Arthropoda	Insecta	Diptera	Sciaridae	Sciaridae sp.	Sciaridae sp. 6	407	0	0	0	0	0	0	0	0	0	0	0	0	0	0	0	0	0	0	0	0	0	0	0	0	0	0	0	0	0	0	0	0	0	0	0	0	0	0	0	0	0
ASV454	TTTATCTTCAACCTTGTCTCATTCAGGGGCCTCAGTTGACTTATCTATTTTTTCTTTACATTTAGCTGGAATTTCCTCTATTTTGGGTGCTGTAAATTTTATTTCTACTATTATTAATATACGAGCCCCTGGAATATCTTTTGATAAAATACCTTTATTTGTTTGATCGGTATTAATTACGGCTATTTTATTATTGCTATCTTTA	Arthropoda	Insecta	Diptera	Sciaridae	Sciaridae sp.	Sciaridae sp. 7	104	0	0	0	0	0	0	0	0	0	0	0	0	0	0	0	0	0	0	0	1	0	0	31	0	0	0	0	0	0	0	0	0	0	0	0	0	0	0	0	0	0
ASV455	TCTTTCATCTACAATCTCCCATTCAGGGGCTTCTGTAGATTTATCTATTTTCTCATTACATTTAGCAGGTATTTCATCAATTTTAGGGGCAGTAAATTTTATTTCTACTATTTTAAATATACGAGCTCCCGGGATAACATTTGATAAAATACCATTATTTGTATGGTCAGTTTTAATTACTGCCATTTTATTACTTCTCTCTCTT	Arthropoda	Insecta	Diptera	Sciaridae	Sciaridae sp.	Sciaridae sp. 8	2611	0	0	0	0	0	0	0	0	1330	0	0	0	0	0	0	0	0	0	0	0	0	0	0	0	0	0	0	0	0	0	0	0	0	0	1281	0	0	0	0	0	0
ASV456	TCTTTCTACTACAATTTCACATTCCGGGGCATCTGTAGATTTATCTATTTTTTCTTTACATTTAGCTGGGATTTCATCTATTTTAGGGGCAGTAAATTTTATCTCTACAATTATTAATATACGAGCCCCGGGAATAAGGTTTGATAAAATACCTTTATTTGTATGATCTGTATTAATTACAGCTATTTTATTACTTTTATCTCTA	Arthropoda	Insecta	Diptera	Sciaridae	Sciaridae sp.	Sciaridae sp. HM421628.1	17149	0	0	0	0	0	0	0	0	0	0	0	0	0	0	0	0	0	0	0	0	0	0	0	0	0	0	0	0	0	0	0	0	0	0	0	0	0	0	0	0	0
ASV457	TCTATCTTCAGGGATTGCTCATGGAGGAGCTTCAGTAGATTTAGCTATTTTTTCACTACATTTAGCCGGAATTTCTTCAATTTTAGGAGCTGTGAATTTTATTACAACTGTAATTAATATACGATCAACTGGAATTACATTTGATCGAATACCATTATTTGTATGAGCTGTAGTAATTACTGCTCTTCTTTTATTATTATCTCTT	Arthropoda	Insecta	Diptera	Sepsidae	Australosepsis	Australosepsis niveipennis	8045	0	0	0	0	0	0	0	0	0	0	0	0	0	0	0	0	0	0	0	0	0	0	0	0	0	0	0	0	0	0	0	0	0	0	0	0	0	0	0	0	0
ASV458	TTTATCATCAGGAATTGCTCATGGTGGAGCTTCAGTTGATCTGGCAATTTTTTCTCTTCATTTAGCTGGAATTTCTTCTATTTTAGGAGCAGTAAATTTCATTACTACTGTAATTAATATACGATCAACAGGTATCACCTTTGATCGAATACCTTTATTTGTATGAGCTGTAGTAATTACTGCATTATTATTACTTTTATCACTT	Arthropoda	Insecta	Diptera	Sepsidae	Parapalaeosepsis	Parapalaeosepsis plebeia	12239	0	0	0	0	0	0	0	0	0	0	0	0	0	0	0	0	0	0	0	0	0	0	0	0	0	0	0	0	0	0	0	0	0	0	0	0	0	0	0	0	0
ASV459	TCTTTCTTCAGGAATTGCTCATGCTGGAGCTTCTGTTGATTTAGCAATTTTTTCTTTGCATCTCGCCGGGATTTCTTCAATTTTAGGGGCAGTAAATTTTATTACAACAATTATTAACATACGATCAAATGGGATTACTTTTGATCGAATACCTTTATTTGTGTGATCAGTCGTAATTACTGCAGTACTATTACTTCTTTCACTT	Arthropoda	Insecta	Diptera	Simuliidae	Simulium	Simulium ornatipes	192	0	0	0	1	0	0	0	0	0	0	0	0	0	0	0	0	0	0	0	0	0	0	0	0	0	0	0	0	8	0	0	0	0	17	80	0	0	0	0	0	0
ASV461	TCTTTCTTCTGGAATTGCACATGGAGGAGCATCAGTAGATTTAGCAATTTTTTCTTTACATTTAGCAGGAATTTCGTCAATTTTAGGAGCTGTAAATTTTATTACAACAGTTATTAATATACGAGCTACTGGAATTACCTTTGATCGAATACCTTTATTTGTATGATCAGTAGTAATTACAGCTTTATTATTATTATTATCTCTT	Arthropoda	Insecta	Diptera	Sphaeroceridae	Pullimosina	Pullimosina heteroneura	101	0	0	0	1	0	2	0	0	0	0	0	0	0	0	0	0	0	0	0	0	0	0	0	0	0	0	0	0	0	0	0	0	89	0	0	0	0	0	0	0	0
ASV462	TCTTTCATCTGGGATTGCACATGGTGGAGCTTCAGTAGATTTAGCTATTTTTTCTTTACATTTAGCTGGAATTTCTTCAATTTTAGGGGCTGTAAATTTTATTACAACAGTAATTAATATACGATCTACAGGAATTACATTTGATCGGATACCTTTATTTGTATGATCTGTAGTAATTACAGCATTATTATTACTATTATCACTA	Arthropoda	Insecta	Diptera	Sphaeroceridae	Rachispoda	Rachispoda sp.	1055	0	0	0	9	1046	0	0	0	0	0	0	0	0	0	0	0	0	0	0	0	0	0	0	0	0	0	0	0	0	0	0	0	0	0	0	0	0	0	0	0	0
ASV463	TTTATCTTCTGGAATCGCTCATGGTGGAGCTTCTGTTGATTTAGCTATTTTTTCTTTACATTTGGCTGGAATTTCTTCTATTTTAGGTGCAGTAAATTTTATTACTACAGTTATTAATATACGATCTACAGGAATTACATTTGACCGAATACCTTTATTTGTTTGATCTGTAGTAATTACAGCATTATTATTATTATTATCTTTA	Arthropoda	Insecta	Diptera	Sphaeroceridae	Sphaeroceridae sp.	Sphaeroceridae sp.	265	0	0	0	0	0	0	0	0	0	0	0	0	0	0	0	0	0	0	0	0	0	0	0	0	0	0	0	0	0	0	0	0	0	0	0	0	0	0	0	0	0
ASV464	CTTAGCCGCTGGTATTGCCCATAGAGGGGCTTCAGTTGATCTAGCTATTTTTTCCCTTCATTTAGCCGGGATTTCTTCAATTTTAGGAGCCGTAAATTTTATTACTACAGTAATCAATATACGATCGACAGGAATTACATTTGATCGAATGCCTCTATTTGTTTGATCAGTGGTAATTACGGCAGTACTTCTTCTTCTGTCACTT	Arthropoda	Insecta	Diptera	Stratiomyidae	Hermetia	Hermetia illucens	4444	0	0	0	0	0	0	0	0	0	0	0	0	0	0	0	0	0	0	0	0	0	0	0	0	0	0	0	0	0	0	0	0	0	0	0	0	0	0	0	0	0
ASV466	TCTTTCAGCTAGAATTGCTCATGGTGGAGCTTCTGTAGATTTAGCTATTTTTTCTCTTCATTTAGCTGGTATATCTTCAATTTTAGGAGTAGTAAATTTTATTACAACTGTAATTAATATACGATCTAATGGAATTTCATATGACCGAATACCTTTATTTGTATGATCAGTAGTAATTACAGCTTTATTACTTTTATTATCATTA	Arthropoda	Insecta	Diptera	Syrphidae	Melangyna	Melangyna collatus/viridiceps	13	0	0	0	0	0	0	0	0	0	0	0	0	0	0	0	0	0	0	0	0	0	0	0	0	0	0	0	0	0	0	0	0	0	0	0	0	0	0	0	0	0
ASV467	TCTTTCTGCTAGAATTGCCCATGGAGGAGCATCTGTTGATTTAGCTATTTTTTCTCTTCATTTAGCCGGAATATCATCAATTTTAGGAGCAGTAAATTTTATTACTACAGTAATTAATATACGATCAAATGGAATTTCATATGATCGAATACCATTATTTGTATGATCAGTTGTAATTACTGCATTACTATTATTATTATCTTTA	Arthropoda	Insecta	Diptera	Syrphidae	Simosyrphus	Simosyrphus grandicornis	1762	0	0	0	0	0	0	0	0	0	0	0	0	0	26	0	0	0	0	0	0	0	0	27	0	0	0	29	0	0	0	22	0	0	0	0	0	1548	0	0	0	3
ASV468	TCTTTCTGCAAGAATTGCTCATGGTGGAGCTTCTGTAGATTTAGCAATTTTTTCATTACATTTAGCAGGAATGTCCTCAATTTTAGGAGCTGTAAATTTTATTACAACAGTAATTAATATACGATCAAATGGAATTACATATGATCGAATACCTTTATTTGTATGATCAGTAGTAATTACTGCTTTATTATTACTTTTATCTTTA	Arthropoda	Insecta	Diptera	Syrphidae	Sphaerophoria	Sphaerophoria macrogaster	776	0	0	0	0	0	0	0	0	0	0	0	0	0	0	0	0	0	0	0	0	0	0	0	0	0	0	0	0	0	0	0	0	0	0	0	0	0	0	0	0	0
ASV469	TTTATCATCTAATATTGCTCATGGAGGAGCATCAGTTGATTTAGCTATTTTTTCTCTCCACTTAGCTGGAATTTCATCAATTTTAGGAGCTGTAAATTTTATTACAACCGTAATTAATATACGAGCTGCAGGAATCACATTTGATCGAATACCTTTATTTGTATGATCTGTAGCAATTACAGCTTTATTATTACTTCTTTCTTTA	Arthropoda	Insecta	Diptera	Tachinidae	Blepharipa	Blepharipa sp.	61247	0	0	0	0	0	0	0	0	0	0	0	0	0	0	0	0	0	0	0	0	0	0	0	0	0	0	0	0	0	0	0	0	0	0	0	0	0	0	0	0	0
ASV470	CCTATCATCTATTATTGCCCATGGTGGAGCTTCTGTTGATTTAGCTATTTTTTCATTACATTTAGCAGGAGTATCTTCAATTTTAGGAGCTGTAAATTTTATTACAACAGTAATTAATATACGATCTACAGGAATTACATTTGATCGAATACCATTATTTGTTTGATCTGTAGTAATTACAGCTTTATTATTATTATTATCACTA	Arthropoda	Insecta	Diptera	Tachinidae	Clytiomya	Clytiomya sp.	276	0	0	0	0	0	0	0	0	0	0	0	0	0	0	0	0	0	0	0	0	0	0	0	0	0	0	0	0	0	0	0	0	0	0	0	0	0	0	0	0	0
ASV471	ACTTTCATCAATTATTGCTCACGGGGGAGCTTCAGTTGATCTAGCTATTTTTTCTTTACATTTAGCTGGGGTTTCATCTATTTTAGGAGCAGTAAATTTTATTACAACTGTAATTAATATACGATCAACTGGAATTACATTTGATCGAATACCTTTATTTGTCTGATCAGTTGTAATTACTGCTTTACTTCTTTTATTATCATTA	Arthropoda	Insecta	Diptera	Tachinidae	Houghia	Houghia sp. 01	16942	0	0	0	0	0	0	0	0	0	0	0	0	0	0	0	0	0	0	0	0	0	0	0	0	0	0	0	0	0	0	0	0	0	0	0	0	0	0	0	0	0
ASV474	CTTATCTTCAAATATTGCACATGGAGGAGCTTCAGTTGATTTAGCAATTTTTTCATTACATCTAGCTGGAATTTCAAGAATTTTAGGAGCTGTAAATTTCATTACAACAGTAATTAATATACGTTCAACTGGAATTACATTTGATCGAATACCATTATTTGTTTGATCAGTAGCAATTACTGCATTATTACTTCTTTTATCATTA	Arthropoda	Insecta	Diptera	Tachinidae	Prosena	Prosena sp. JF872420.1	16089	0	0	0	0	0	0	0	0	0	0	0	0	0	0	0	0	0	0	0	0	0	0	0	0	0	0	0	0	0	0	0	0	0	0	0	0	0	0	0	0	0
ASV475	TTTATCTTCTATTATTGCTCATGGTGGAGCTTCAGTTGATTTAACAATTTTTTCACTTCATTTAGCTGGTATTTCTTCAATTTTAGGAGCTATTAATTTTATTACAACAGTAATTAATATACGATCAACAGGAATTAGTTTTGATCGAATACCTTTATTTGTATGATCTGTTTTAATTACAGCTTTATTACTTCTTTTATCTTTA	Arthropoda	Insecta	Diptera	Tachinidae	Tachinidae sp.	Tachinidae sp. 1	184336	0	0	0	0	0	0	0	0	0	0	0	0	0	0	0	0	0	0	0	0	0	0	0	0	0	0	0	0	0	0	0	0	0	0	0	0	0	0	0	0	0
ASV476	TTTATCTTCTAATATCTCTCATATAGGATCTTCAGTTGATTTAGCTATTTTTTCATTACATTTAGCAGGAATTTCATCAATTTTAGGAGCTGTTAATTTTATTACTACAGTAATTAATATACGATCAATAGGAATTACATTTGATCGAATACCTTTATTTGTTTGATCAGTAGCAATTACAGCTTTATTACTTCTGTTATCATTA	Arthropoda	Insecta	Diptera	Tachinidae	Tachinidae sp.	Tachinidae sp. 2	8520	0	0	0	0	0	0	0	0	0	0	0	0	0	0	0	0	0	0	0	0	0	0	0	0	0	0	0	0	0	168	6087	1	0	0	0	0	0	0	0	0	0
ASV477	TTTATCATCTAATATTGCCCATGGAGGAGCTTCTGTTGATTTAGCTATTTTTAGTCTTCATTTAGCCGGAATTTCTTCAATTTTAGGAGCCGTTAACTTTATTACTACTGTAATTAATATACGATCAACAGGAATAACCTTTGATCGAATACCATTATTTGTATGATCAGTAGCTATTACTGCCTTACTCCTTCTATTATCTTTA	Arthropoda	Insecta	Diptera	Tachinidae	Tachinidae sp.	Tachinidae sp. 3	2009	0	0	0	0	0	0	0	0	0	0	0	0	0	0	0	0	0	0	0	0	0	0	0	0	0	0	0	0	0	0	0	0	0	0	0	0	0	0	0	0	0
ASV478	TTTATCATCTAATATTGCCCATGGAGGAGCTTCAGTAGATTTAGCAATTTTTTCTTTACATTTAGCTGGAATTTCTTCTATTTTAGGAGCTGTAAATTTTATCACTACTGTTATTAATATACGATCAACAGGAATTACATTTGATCGAATACCTTTATTTGTATGATCAGTAGTAATTACTGCTTTATTACTTTTATTATCTTTA	Arthropoda	Insecta	Diptera	Tachinidae	Tachinidae sp.	Tachinidae sp. JF271558.1	1217	0	1	0	6	0	0	0	0	5	0	0	6	14	69	14	0	0	0	1	0	0	89	132	0	0	0	0	259	15	18	62	1	139	27	0	0	0	0	0	0	0
ASV479	CCTATCGTCTGTTATTGCACACGGAGGGGCTTCAGTTGATTTAGCTATTTTCTCACTTCACTTAGCTGGTATCTCATCGATTTTAGGAGCAGTAAATTTCATTACAACAGTTATTAATATACGATCTACAGGAATTTCGTTTGACCGAATACCTCTTTTCGTTTGAGCAGTTGTATTAACAGCCCTATTACTTTTACTATCATTG	Arthropoda	Insecta	Diptera	Tephritidae	Bactrocera	Bactrocera aquilonis/neohumeralis/tryoni	39014	0	0	0	0	0	0	0	0	0	0	0	0	0	0	0	0	0	0	0	0	0	0	0	0	0	0	0	0	0	0	0	0	0	0	0	0	0	0	0	0	0
ASV482	TTTAGCTGCTAATATCGCTCACGGAGGTTCTTCGGTAGATTATGCCATTTTTTCTTTACATTTAGCAGGTGTCTCTTCTATTTTAGGGGCTGTTAATTTTATCACTACTGTAATTAATATGCGTAGACCTGGTATAACTTTAGATCGTATTCCTTTATTTGTTTGATCTGTAGTAATTACTGCAGTATTATTGTTGTTATCTTTA	Arthropoda	Insecta	Ephemeroptera	Baetidae	Cloeon	Cloeon fluviatile	21	0	0	0	0	0	0	0	0	0	0	0	0	21	0	0	0	0	0	0	0	0	0	0	0	0	0	0	0	0	0	0	0	0	0	0	0	0	0	0	0	0
ASV484	CCTATCTATAAGGCTGTCACATAGGGGGAATTCTGTCGATTTTTCTATTATTTCTTTGCACGTTGCTGGAATTTCTTCTATTTTGGGATCACTTAATTTTATCGTGACTATTGTAAACATGCGGGCGTTGGGCATAAAAATGGAGTTTTTATCTTTGTTTGTCTGATCTGTGTTTATTACTGTTTTCTTGCTTTTAATTTCTCTT	Arthropoda	Insecta	Hemiptera	Aleyrodidae	Trialeurodes	Trialeurodes vaporariorum	1296	0	0	0	0	0	0	0	0	0	0	0	0	0	0	0	0	0	0	0	0	0	0	0	0	0	0	0	0	1045	0	0	0	0	0	0	0	0	0	0	0	0
ASV485	ATTATCTTCAAATATTTCACATAGAGGTGCTTCAGTAGATTTAGCCATTTTCTCATTACATTTAGCAGGAGTATCATCAATTTTAGGAGCTGTAAATTTTATTTCCACTATTATTAATATACGACCTGTAGGAATAATTCCTGAACGAATTCCTCTATTTGTTTGATCAGTAGGAATTACTGCTTTACTATTACTTTTATCTTTA	Arthropoda	Insecta	Hemiptera	Alydidae	Melanacanthus	Melanacanthus marginatus	1575	0	0	0	0	0	0	0	0	0	0	0	0	0	0	0	0	0	0	0	0	0	0	0	0	0	0	0	0	0	0	0	0	0	0	0	0	0	0	0	0	0
ASV486	ACTGTCTAATTCTATATTTCATAGAGGGTATTCAGTTGATATTGCAATTTTTTCACTTCATTTGGCTGGAATTTCTTCAATTTTAGGGGCTATTAATTTTATTACAACAATTATAAATATGCGATCTTCACTTTATCCTCTAGAAAAAATACCTTTATTTGTTTGATCAGTATTAATTACAGCTTTTTTATTATTATTTTCACTT	Arthropoda	Insecta	Hemiptera	Aphalaridae	Anoeconeossa	Anoeconeossa communis	2374	0	0	0	0	0	0	0	0	0	0	0	0	0	0	0	0	0	0	0	0	0	0	0	0	0	0	0	0	0	0	0	0	0	0	0	0	0	0	0	0	0
ASV487	TTTATCTAATAGAGTATTTCATAGAGGATACTCTGTAGATGTAGCTATTTTTTCTCTTCATTTAGCAGGTATTTCTTCTATTTTAGGTGCAATTAATTTTATTACTACAATTATTAATATACGATCTTCTTTATATCCTATAGAAAAAATACCTTTATTTGTTTGATCTGTTTTTATTACTGCTTTTTTATTATTATTTTCTTTA	Arthropoda	Insecta	Hemiptera	Aphalaridae	Blastopsylla	Blastopsylla occidentalis	114020	32	24	0	0	0	0	0	0	0	0	1401	0	0	0	0	0	0	0	0	0	0	1	0	0	0	0	0	0	0	0	0	0	0	0	0	0	0	0	0	0	1178
ASV488	TCTTTCTAATAGTATATTCCATAGAGGGTACTCTGTAGACGTAGCTATTTTTTCTTTACATTTAGCTGGAGTTTCTTCTATCTTAGGAGCTATTAATTTTATTACAACAATTATTAATATACGTTCTTCTCTCTATCCTTTGGAAAAAATGCCTTTATTTGTGTGATCTGTTTTAATTACTGCTTTCTTACTTCTTTTCTCATTA	Arthropoda	Insecta	Hemiptera	Aphalaridae	Cryptoneossa	Cryptoneossa triangula	13841	0	0	0	0	0	0	0	0	0	0	0	0	0	0	0	0	0	0	0	0	0	0	0	0	0	0	0	0	0	0	0	0	0	0	0	0	0	0	0	0	0
ASV489	TTTATCTAATTCTATATTTCATAGAGGATACTCTGTAGACACAGCAATTTTCTCTCTGCATTTAGCAGGAATTTCTTCTATCTTAGGAGCAATTAATTTCATCACAACTATTATGAATATGCGATCTTCTCTGTACTCTATAGAAAAAATACCTCTATTTGTTTGATCTGTTTTAATTACAGCAATCTTACTTCTATTATCCCTA	Arthropoda	Insecta	Hemiptera	Aphalaridae	Ctenarytaina	Ctenarytaina eucalypti	3379	0	0	0	0	0	0	0	0	0	0	0	0	0	0	0	0	0	0	999	2317	0	0	0	0	0	0	0	0	0	3	0	0	0	0	0	0	0	0	0	0	0
ASV490	ACTTTCTAGAAGTCTTTTTCATAGAGGTTATTCTGTGGATGTGGCTATTTTTTCACTACATTTAGCTGGGACTTCTTCTATTTTAGGAGCTATTAATTTTATTACTACAATTCTTAATATACGTTCTTCTCTATATTCATTAGAAAAAATGCCTTTATTTGTTTGGTCTGTATTAATTACAGCATTTTTATTACCCTTTTCTCTC	Arthropoda	Insecta	Hemiptera	Aphalaridae	Eucalyptolyma	Eucalyptolyma maideni	10	0	0	0	0	0	0	0	0	0	0	0	0	0	0	0	0	0	0	0	0	0	0	0	0	0	0	0	0	0	0	0	0	0	0	0	0	0	0	0	0	0
ASV492	CTTATCAAATAATATTGCACATAATAATATTTCAGTTGATTTAACTATTTTTTCTTTACATTTAGCAGGAATTTCTTCAATTTTAGGAGCAATTAATTTTATTTGTACAATTCTTAATATAATACCAAATAACATAAAATTAAATCAAATTCCTTTATTTCCTTGATCAATTTTAATTACAGCTATTTTATTAATTTTATCTCTA	Arthropoda	Insecta	Hemiptera	Aphididae	Acyrthosiphon	Acyrthosiphon lactucae	146495	0	0	0	0	0	0	0	0	0	0	0	0	0	0	0	0	0	0	0	0	0	0	0	0	0	0	0	0	0	0	0	0	0	0	0	0	0	0	0	0	0
ASV493	TTTATCAAATAATATTGCACATAATAACATTTCAGTTGATTTAACTATTTTTTCTTTACACCTAGCAGGAATTTCATCAATTTTAGGAGCAATTAATTTTATTTGTACAATTCTTAATATAATACCTAATAACATAAAATTAAATCAAATTCCACTTTTCCCTTGATCAATTTTAATTACAGCTATCTTATTAATTTTATCTTTA	Arthropoda	Insecta	Hemiptera	Aphididae	Acyrthosiphon	Acyrthosiphon pisum	6	0	0	0	0	0	0	0	0	0	0	0	0	0	0	0	0	0	0	0	0	0	0	0	0	0	0	0	0	0	0	0	0	0	0	0	0	0	0	0	0	0
ASV494	TTTATCAAACAATATTGCTCATAATAACATTTCAGTTGATTTAACTATTTTCTCTCTTCATTTAGCAGGTATTTCATCAATTTTAGGAGCAATTAATTTTATTTGTACTATTCTTAATATAATACCGAATAATATAAAGTTAAATCAAATTCCATTATTCCCTTGATCAATCCTAATTACAGCTATATTATTAATTTTATCATTA	Arthropoda	Insecta	Hemiptera	Aphididae	Aphis	Aphis craccivora/masoni/rumicis	195	0	0	0	0	0	0	0	0	0	0	0	0	0	0	0	0	0	0	0	0	0	0	2	0	0	0	0	0	0	0	0	0	0	0	0	0	0	0	0	0	0
ASV495	TTTATCAAATAATATTGCTCATAATAATATTTCAGTAGACTTAACTATTTTTTCCCTACATTTAGCAGGTATCTCATCAATTTTAGGAGCAATTAATTTCGTCTGTACTATCTTAAATATAATACCTAATAATATAAAATTAAATCAAATTCCTCTATTTCCATGATCAATTTTAATTACAGCTATATTATTAATTTTATCCTTA	Arthropoda	Insecta	Hemiptera	Aphididae	Aphis	Aphis gossypii	82	0	0	0	0	0	0	0	0	0	0	0	0	0	0	0	0	0	0	0	0	0	0	0	0	0	0	0	0	0	0	0	0	0	0	0	0	0	0	0	0	0
ASV496	TTTATCAAATAATATTGCTCATAACAATATTTCAGTTGACTTAACTATTTTTTCTCTTCACCTAGCAGGTATTTCATCAATCTTAGGAGCAATCAATTTTATTTGTACAATTCTTAATATAATACCCAATAATATAAAATTAAATCAAATCCCTTTATTTCCATGATCAATCCTAATTACAGCTATACTATTAATTTTATCTTTA	Arthropoda	Insecta	Hemiptera	Aphididae	Aphis	Aphis lugentis	1079	0	0	0	0	0	0	0	0	0	0	0	0	0	0	0	0	0	0	0	0	0	0	0	0	0	0	0	0	0	0	0	0	0	0	0	0	0	0	0	0	0
ASV497	TTTATCAAATAATATCGCTCATAATAATATTTCAGTTGATTTAACTATCTTCTCTTTACATTTAGCAGGTATTTCATCAATTTTAGGAGCAATTAACTTTATTTGTACAATCCTAAATATAATACCAAATAATATAAAATTAAATCAAATTCCTTTATTTCCATGATCAATCCTAATTACAGCTATACTATTAATTTTATCTTTA	Arthropoda	Insecta	Hemiptera	Aphididae	Aphis	Aphis oenotherae	5868	0	0	0	0	0	0	0	0	0	0	0	0	0	0	0	0	0	0	0	0	0	0	0	0	0	0	0	0	0	0	0	0	0	0	0	0	0	0	0	0	0
ASV498	TTTATCAAATAATATTGCTCATAATAATATTTCAGTTGATTTAACCATCTTTTCTCTTCACTTAGCAGGTATTTCATCAATTTTAGGAGCAATTAATTTTATTTGTACAATTCTTAATATAATACCAAACAATATAAAATTAAATCAAATCCCACTATTTCCATGATCAATCTTAATTACAGCTATATTATTAATTTTATCTCTA	Arthropoda	Insecta	Hemiptera	Aphididae	Aphis	Aphis spiraecola	107	0	0	0	0	0	0	0	0	0	0	0	0	0	0	0	0	0	0	0	0	0	0	0	0	0	0	0	0	0	0	0	0	0	0	0	0	0	0	0	0	0
ASV501	ATTATCAAATAATATTGCTCATAATAATATTTCAGTTGATTTAACTATTTTTTCTTTACACTTAGCAGGAATTTCCTCAATTTTAGGAGCAATTAACTTTATTTGTACTATTTTAAATATAATACCAAATAATATAAAACTAAATCAAATTCCTCTTTTTCCATGATCAATTTTAATTACAGCTATTTTATTAATTTTATCTTTA	Arthropoda	Insecta	Hemiptera	Aphididae	Brachycaudus	Brachycaudus rumexicolens/sedi	649	117	155	0	0	0	1	0	0	3	0	0	0	3	12	0	0	0	11	0	0	2	12	14	0	0	0	2	0	0	0	4	0	34	17	0	0	0	0	0	0	0
ASV502	TCTATCAAATAATATTGCTCATAATAATATTTCAGTTGATTTAACTATTTTTTCTTTACATTTAGCAGGAATTTCATCAATTTTAGGAGCAATTAATTTTATCTGTACAATTCTAAATATAATACCTAATAATATAAAATTAAATCAAATTCCTCTTTTTCCATGATCAATTTTAATTACAGCTATTTTATTAATCTTATCTCTC	Arthropoda	Insecta	Hemiptera	Aphididae	Brevicoryne	Brevicoryne brassicae	243	0	0	0	0	0	0	0	0	2	0	0	0	0	6	0	1	0	0	0	0	5	0	11	0	0	0	0	13	0	0	22	0	0	14	0	0	0	0	0	0	0
ASV503	ATTATCAAATAATATTGCTCATAATAATATTTCAGTTGATTTAACTATTTTTTCTTTACACTTAGCAGGAATTTCATCAATTTTAGGAGCAATTAATTTTATTTGTACAATTTTAAATATAATACCTAATAATTTAAAATTAAATCAAATTCCTCTTTTTCCATGATCAATTCTAATTACAGCTATTCTATTAATCTTATCTTTA	Arthropoda	Insecta	Hemiptera	Aphididae	Diuraphis	Diuraphis noxia	7562	0	0	0	4	0	2	0	8	7	0	0	0	0	20	8	0	0	11	0	2	0	48	70	0	0	0	2	65	0	0	2	0	3400	18	0	0	0	0	0	0	4
ASV504	ATTATCAAACAATATTGCACATAATAATATTTCAGTTGATTTAACTATTTTTTCATTACATTTAGCAGGAATTTCATCAATTTTAGGAGCAATTAATTTTATTTGTACAATTCTTAACATAATACCAAATAATATAAAACTTAATCAAATTCCTCTTTTTCCATGATCAATCTTAATTACAGCTATTTTATTAATTTTATCACTA	Arthropoda	Insecta	Hemiptera	Aphididae	Hyadaphis	Hyadaphis coriandri	25994	0	0	0	0	0	0	0	0	0	0	0	0	0	0	0	0	0	0	110	291	0	0	0	0	0	0	0	0	0	0	0	0	0	0	0	0	0	0	0	0	0
ASV505	TCTATCAAATAATATTGCACATAATAATATTTCAGTAGATTTAACTATTTTTTCATTACACCTAGCAGGAATCTCATCAATTTTAGGAGCAATTAATTTTATTTGTACAATTTTAAATATAATACCTAATAATATAAAATTAAATCAAATTCCTCTTTTCCCTTGATCAATTTTAATTACAGCTATTTTATTGATTTTATCTTTA	Arthropoda	Insecta	Hemiptera	Aphididae	Hyperomyzus	Hyperomyzus carduellinus	429	0	0	0	0	0	0	0	0	0	0	0	0	0	0	0	0	0	0	0	0	0	0	0	0	0	0	0	0	0	0	0	0	0	0	0	0	0	0	0	0	0
ASV507	TTTATCTAATAATATTGCACATAATAATATTTCAGTTGATTTAACAATTTTTTCTTTACATTTAGCAGGAATTTCATCAATTTTAGGGGCAATCAATTTTATTTGTACAATTCTTAATATAATACCTAATAATATAAAATTAAATCAAATTCCATTATTTCCTTGATCAATTCTAATTACAGCAATACTACTTATTTTATCACTA	Arthropoda	Insecta	Hemiptera	Aphididae	Hysteroneura	Hysteroneura setariae	148	0	0	0	0	0	0	0	0	0	0	0	0	0	0	0	0	0	0	0	0	0	0	0	0	0	0	0	0	0	0	0	0	0	0	0	0	0	0	0	0	0
ASV508	TTTATCAAATAATATTGCTCACAATAATATTTCAGTTGATTTAACTATTTTTTCTCTACACTTAGCAGGAATCTCTTCAATTTTAGGAGCAATTAATTTTATCTGCACAATCCTAAATATAATACCTAATAATATAAAATTAAATCAAATTCCTCTTTTCCCATGATCAATTTTAATTACAGCTATTTTATTAATTTTATCTCTA	Arthropoda	Insecta	Hemiptera	Aphididae	Lipaphis	Lipaphis erysimi	197473	0	0	0	0	0	0	0	0	0	0	0	0	0	0	0	0	0	10	0	0	2	3812	4502	0	0	0	5	19	0	0	0	0	0	0	0	0	0	0	9612	9070	0
ASV509	TTTATCAAATAATATTGCTCACAATAATATTTCAGTTGATTTAACTATTTTTTCTCTACACTTAGCAGGAATCTCTTCAATTTTAGGAGCAATTAATTTTATTTGTACAATCCTAAATATAATACCTAATAATATAAAATTAAATCAAATTCCTCTTTTCCCATGATCAATTTTAATTACAGCTATTTTATTAATTTCATCTCTA	Arthropoda	Insecta	Hemiptera	Aphididae	Lipaphis	Lipaphis pseudobrassicae	1829	0	0	0	0	0	0	0	0	0	0	0	0	0	0	0	0	0	0	0	0	0	0	0	0	0	0	0	0	0	0	0	0	0	0	0	0	0	0	13	17	0
ASV510	CTTATCAAATAATATTGCACATAATAATATTTCAGTTGATTTAACTATTTTTTCATTACATTTAGCAGGAATTTCATCAATTTTAGGAGCAATTAATTTTATTTGTACAATCTTAAATATAATACCAAACAATATAAAATTAAACCAAATCCCTTTATTTCCATGATCAATTTTAATTACAGCTATTTTATTAATTTTATCTTTA	Arthropoda	Insecta	Hemiptera	Aphididae	Myzus	Myzus persicae	9027	2	0	0	3	0	0	0	9	12	0	3	3	0	24	0	4	1	4	0	0	2	22	18	0	0	0	9	19	0	4	3	0	73	31	0	0	0	0	0	0	0
ASV511	ATTATCAAACAATATTGCACATAATAATATTTCAGTTGATTTAACTATTTTTTCATTACACTTAGCTGGAATCTCTTCAATTTTAGGTGCAATTAATTTTATTTGTACAATTTTAAATATAATACCAAATAATATAAAATTAAACCAAATCCCTCTTTTCCCTTGATCAATCTTAATTACAGCTATTTTATTAATTTTATCTTTA	Arthropoda	Insecta	Hemiptera	Aphididae	Nearctaphis	Nearctaphis bakeri	759	0	0	0	0	0	0	0	0	0	0	0	0	0	0	0	0	0	0	0	0	0	0	0	0	0	0	0	0	0	0	0	0	0	0	0	0	0	0	0	0	0
ASV512	ATTATCTAATAATATTGCTCATAATAATATTTCAGTTGATTTAACAATTTTTTCACTTCATTTAGCAGGAATTTCCTCAATCTTAGGAGCAATTAATTTTATTTGTACAATTTTAAATATAATACCTAATAATATAAAACTAAATCAAATTCCACTTTTTCCTTGATCAATTTTAATCACAGCTATACTATTAATCTTATCACTA	Arthropoda	Insecta	Hemiptera	Aphididae	Rhopalosiphum	Rhopalosiphum maidis	24115	0	0	0	0	0	0	0	0	0	0	0	0	0	0	0	0	0	0	0	0	0	0	0	0	0	0	0	0	0	0	0	0	0	0	0	0	0	0	0	0	0
ASV513	TCTATCAAATAATATTGCTCATAATAATATTTCAGTTGATTTAACAATTTTTTCTCTACATTTAGCAGGAATCTCATCAATTTTAGGAGCAATTAATTTTATTTGTACAATTTTAAATATAATACCTAATAATATAAAATTAAACCAAATTCCATTATTCCCTTGATCAATTTTAATTACAGCTATATTATTAATTTTATCTTTA	Arthropoda	Insecta	Hemiptera	Aphididae	Rhopalosiphum	Rhopalosiphum padi	18	0	0	0	2	0	0	0	0	0	0	0	0	0	0	0	0	0	0	0	0	0	0	0	0	0	0	0	0	0	0	0	0	0	0	0	0	0	0	0	0	0
ASV514	CTTATCTAATAATATTGCTCATAATAATATTTCAGTCGATTTAACAATTTTTTCTCTTCATTTAGCAGGAATTTCATCAATTTTAGGAGCAATCAATTTTATCTGTACAATTTTAAATATAATACCTAATAATATAAAATTAAATCAAATTCCACTATTTCCTTGATCAATTTTAATTACAGCTATATTATTAATTTTATCATTA	Arthropoda	Insecta	Hemiptera	Aphididae	Rhopalosiphum	Rhopalosiphum rufiabdominalis	67016	0	0	0	0	0	0	0	0	0	0	0	0	845	14177	0	0	0	0	0	0	0	0	0	0	0	0	43	0	0	0	0	0	0	0	0	0	0	0	0	0	0
ASV515	ATTATCTAATAATATTGCTCATAATAATATTTCTGTTGATTTAACAATCTTTTCTTTACATTTAGCAGGAATTTCTTCTATTCTAGGAGCAATTAATTTTATTTGTACAATTTTAAATATAATACCTAATAATATAAAATTAAATCAAATTCCTTTATTCCCTTGATCAATTTTAATTACAGCTATTTTATTAATTTTATCATTA	Arthropoda	Insecta	Hemiptera	Aphididae	Schizaphis	Schizaphis sp. nr KR560436.1	210	0	0	0	0	0	0	0	0	0	0	0	0	0	0	0	0	0	0	0	0	0	0	0	0	0	0	0	0	0	0	0	0	0	0	0	0	0	0	0	0	0
ASV516	ATTATCTAATAATATTGCCCATAATAATATTTCAGTTGACCTAACTATTTTTTCACTTCATTTAGCAGGAATTTCCTCAATCCTTGGAGCTATTAATTTTATTTGTACAATTCTTAATATAATACCAAATAATATAAAATTAAATCAAATCCCACTATTTCCATGATCAATCTTAATTACTGCAATTTTATTAATTTTATCATTA	Arthropoda	Insecta	Hemiptera	Aphididae	Shivaphis	Shivaphis celti	6	0	0	0	0	0	0	0	0	0	0	0	0	0	0	0	0	0	0	0	0	0	0	0	0	0	0	0	0	0	0	0	0	0	0	0	0	0	0	0	0	0
ASV517	TCTATCTAATAATATCGCACATAATAATATTTCAGTAGATTTAACAATTTTTTCTCTACATTTAGCAGGAATTTCCTCAATCTTAGGAGCTATTAACTTTATTTGTACAATTTTAAATATAATACCTAATAATACAAAATTAAATCAAATTCCTCTTTTCCCTTGATCAATTTTAATTACTGCAATTTTATTAATTTTATCATTA	Arthropoda	Insecta	Hemiptera	Aphididae	Therioaphis	Therioaphis nr trifolii	308	0	0	0	0	0	0	0	0	0	0	0	0	0	0	0	0	0	0	0	0	0	0	0	0	0	0	0	0	0	0	0	0	0	0	0	0	0	0	0	0	0
ASV518	TCTATCTAATAATATTGCACATAATAATATTTCAGTAGATTTGACAATTTTTTCCCTACATTTAGCAGGAATCTCCTCAATCTTAGGAGCTATTAACTTTATTTGTACAATTTTAAATATAATACCTAATAATATAAAATTAAATCAAATTCCCCTTTTCCCTTGATCAATTTTAATTACTGCAATTTTATTAATTTTATCGTTA	Arthropoda	Insecta	Hemiptera	Aphididae	Therioaphis	Therioaphis trifolii	81926	0	0	0	0	0	0	0	0	0	0	0	0	0	0	0	0	0	0	0	0	0	0	0	0	0	0	0	0	0	0	0	0	0	0	0	0	0	0	0	0	0
ASV519	CTTATCTAATAATATTGCACATAATAATATTTCAGTAGATTTAACTATCTTTTCATTACATTTAGCAGGAGTATCATCAATTTTAGGAGCTATTAATTTTATTTGTACAATTTTAAACATAATACCTAATAATATAAAATTAAATCAAATCCCTTTATTCCCATGATCAATTTTAATTACAGCTATCTTATTAATCTTATCATTA	Arthropoda	Insecta	Hemiptera	Aphididae	Tinocallis	Tinocallis ulmiparvifoliae	1087	0	0	0	0	0	0	0	0	0	0	0	0	0	0	0	0	0	0	0	0	0	0	0	0	0	0	0	0	0	0	0	0	0	0	0	0	0	0	0	0	0
ASV520	TTTATCAAATAATATTGCACATAACAATATTTCAGTTGATTTAACAATTTTTTCTTTACATTTAGCAGGAATTTCATCAATCTTAGGAGCAATTAATTTTATTTGTACAATTTTAAATATAATACCAAATAATATAAAATTAAATCAAATTCCTCTTTTCCCTTGATCAATCTTAATTACAGCTATTTTATTAATTTTATCATTA	Arthropoda	Insecta	Hemiptera	Aphididae	Uroleucon	Uroleucon erigeronensis	964	0	0	955	0	7	0	0	0	0	0	0	0	0	0	0	0	0	0	0	0	0	0	0	0	0	0	0	0	0	0	0	0	0	0	0	0	0	0	0	0	0
ASV521	TTTATCAAATAATATTGCACATAATAATATTTCAGTTGATTTAACAATTTTCTCTCTACATTTAGCAGGAATCTCATCAATTTTAGGAGCAATTAACTTTATTTGTACAATTTTAAATATAATACCAAATAATATAAAATTAAATCAAATCCCTCTCTTCCCTTGATCAATTTTAATTACAGCTATTCTATTAATTTTATCATTA	Arthropoda	Insecta	Hemiptera	Aphididae	Uroleucon	Uroleucon sonchi	95	0	0	0	0	0	0	0	0	0	0	0	0	0	0	0	0	0	0	0	0	0	0	0	0	0	0	0	0	95	0	0	0	0	0	0	0	0	0	0	0	0
ASV522	ACTATCTTCTAATATTTCTCACTCTGGGGCGAGAGTCGATCTAACTATTTTCTCCCTACACTTAGCTGGTATTTCATCTATTCTTGGAGCTATTAACTTTATTACAACAGTAATTAATATACGTTCACCCGGTATAAAAATAGATCAAACTCCATTATTTGTATGATCTGTATTAATTACTGCTATCCTTCTTCTTCTCTCACTC	Arthropoda	Insecta	Hemiptera	Cicadellidae	Austroagallia	Austroagallia torrida	233421	0	0	906	0	0	0	0	0	0	0	0	0	0	0	7667	8185	12752	0	0	2	0	0	0	1	0	0	6	0	7	0	93	0	0	33	0	0	9984	5	0	0	0
ASV523	TCTATCTAGAAATATTGCTCACGCAGGACCAAGAGTTGATATAGCTATTTTTTCTCTTCATTTAGCTGGTATTTCTTCTATTTTAGGTGCAGTAAATTTTATTACTACAGTTATAAATATACGACCGACTGGAATGGATATAGATAAAACACCTCTATTCGTTTGATCTGTAATTATTACAGCTGTGTTATTATTGCTTTCTTTA	Arthropoda	Insecta	Hemiptera	Cicadellidae	Balclutha	Balclutha incisa	25340	0	0	0	0	0	0	0	0	0	0	0	0	0	0	0	0	0	0	0	0	0	0	0	0	0	0	0	0	0	0	0	0	0	0	0	0	0	0	0	0	0
ASV525	ACTATCAAGAAATATTGCACATGCAGGAGCAAGAGTTGATATATCTATTTTTTCACTACACCTAGCTGGAATTTCATCAATTTTAGGGGCAGTTAACTTTATTTCAACAGTAATAAATATACGACCTACAGGAATATCACTAGACCGAACACCATTATTTGTTTGATCTGTATTAATCACTGCAGTATTACTTCTTCTATCTTTA	Arthropoda	Insecta	Hemiptera	Cicadellidae	Cicadellidae sp.	Cicadellidae sp. 01	8295	0	0	0	0	0	0	0	0	0	0	0	0	0	0	0	0	0	0	0	0	0	0	0	0	0	0	0	0	0	0	0	0	0	0	0	0	0	0	0	0	0
ASV527	CCTATCAAGCAACATTGCTCATGAAGGACCTAGAGTGGATATATCTATTTTTTCGTTACACTTAGCAGGTATCTCCTCAATCCTGGGAGCAGTAAATTTTATTACAACAGTAATTAATATACGATCAAACGGAATTACATTAGATCGAATACCTTTATTTGTTTGATCAGTAATTATTACCGCTATTTTATTACTATTATCTTTA	Arthropoda	Insecta	Hemiptera	Cicadellidae	Cicadellidae sp.	Cicadellidae sp. 03	85	0	0	0	0	0	0	0	0	0	0	0	0	0	0	0	0	0	0	0	0	0	0	0	0	0	0	0	0	0	0	0	0	0	0	0	0	0	0	0	0	0
ASV528	CCTATCAGGAAATATTGCTCATGCAGGACCTAGAGTTGATATATCAATTTTCTCACTTCATTTAGCAGGTATTTCTTCAATCCTAGGAGCTATTAATTTTATTACAACAGTAATAAATATACGACCTTCAGGAATAAAGATAGATCGAACACCATTATTTGTATGATCAGTTCTCATTACAGCTATTTTACTACTACTTTCATTA	Arthropoda	Insecta	Hemiptera	Cicadellidae	Cicadellidae sp.	Cicadellidae sp. 04	4811	0	0	0	0	0	0	0	0	0	0	0	0	0	0	0	0	0	0	0	0	0	0	0	0	0	0	0	0	0	0	0	0	0	0	0	0	0	0	0	0	0
ASV530	TCTCTCAGGTAATATTGCTCATGCAGGACCAAGAGTTGATATATCAATTTTTTCACTTCACTTAGCAGGTATCTCATCAATTTTAGGAGCTATTAACTTCATCACAACAGTAATAAACATACGACCTATAGGAATAAGAATAGATCGAACACCATTATTTGTTTGATCTGTTATTATTACAGCTGTATTACTACTTCTTTCATTA	Arthropoda	Insecta	Hemiptera	Cicadellidae	Deltocephalinae sp.	Deltocephalinae sp. KF226846.1	23280	0	0	0	0	0	0	0	0	0	0	0	0	0	0	0	0	0	0	0	0	0	0	0	0	0	0	0	0	0	0	0	0	0	0	0	0	0	0	0	0	0
ASV531	CCTATCAAGAAATATTGCTCACTCAGGACCAAGAGTTGACATATCAATCTTTTCTCTTCACTTAGCAGGTATTTCTTCAATTCTTGGTGCAGTAAACTTTATTTCTACAGTAATAAATATACGACCAACCGGAATATCTATAGATCGAACTCCATTATTTGTTTGATCAGTAGTAATTACTGCAGTTTTACTGTTACTTTCCCTA	Arthropoda	Insecta	Hemiptera	Cicadellidae	Exitianus	Exitianus nanus	179811	0	0	0	0	0	0	0	0	0	0	0	0	0	0	0	0	0	0	0	0	0	0	0	0	0	0	0	0	0	0	0	0	0	0	0	0	0	0	0	0	0
ASV532	TCTTTCTAGAAACATTGCCCACTCAGGACCTAGAGTAGACATATCTATCTTCTCACTACATTTAGCTGGTATTTCCTCAATCTTAGGGGCAGTTAATTTCATCTCAACAGTAATAAATATACGACCGTCAGGAATATCAATAGACCGAACTCCTTTATTTGTTTGATCAGTTTTAATCACTGCAGTTTTACTTTTACTATCCCTA	Arthropoda	Insecta	Hemiptera	Cicadellidae	Exitianus	Exitianus plebeius	715	0	0	0	0	0	0	0	0	0	0	0	0	0	0	0	0	0	0	0	0	0	0	0	0	0	0	0	0	0	0	0	0	0	0	0	0	0	0	0	0	0
ASV533	ACTATCCTCTAACCTGACACATTCGGGGCCAAGAGTAGATATATCAATCTTCTCTCTTCATCTAGCAGGAATCTCTTCAATTTTAGGAGCAATTAATTTTATTACTACTGTAATAAATATACGACCCTCAGGAATAACAATAGACCGAACACCACTATTTGTTTGATCAGTTTTAATCACAGCAATTTTACTACTACTATCATTA	Arthropoda	Insecta	Hemiptera	Cicadellidae	Goniagnathus	Goniagnathus sp. nr KF226959.1	7071	0	0	0	0	0	0	0	0	0	0	0	0	0	0	0	0	0	0	0	0	0	0	0	0	0	0	0	0	0	0	0	0	0	0	0	0	0	0	0	0	0
ASV534	ACTTTCTAGAAATATTGCTCATGCTGGACCAAGAGTTGATATATCAATTTTTTCTTTACACTTAGCAGGAATATCCTCAATTTTAGGTGCAATTAACTTCATTACTACAATTATAAATATACGACCTCAAGGGATAAATCTTGATAAAACTCCATTATTTGTGTGATCAGTATTAATTACCGCAGTACTACTTCTATTATCTTTA	Arthropoda	Insecta	Hemiptera	Cicadellidae	Macrosteles	Macrosteles laevis	1510	0	0	0	0	0	0	0	0	0	0	0	0	0	0	0	0	0	0	0	0	0	0	0	0	0	0	0	0	0	0	0	0	0	0	0	0	0	0	0	0	0
ASV535	ATTATCAAGAAATATTGCACACGCAGGACCTAGAGTTGACATATCAATTTTCTCACTTCATTTAGCAGGTATCTCATCAATTTTAGGTGCAATTAATTTTATTACTACAGTAATAAACATACGACCTAATGGAATAACAATAGAACGAACTCCTTTATTTGTATGATCTGTACTAATTACAGCAATTTTATTATTATTGTCTTTA	Arthropoda	Insecta	Hemiptera	Cicadellidae	Maiestas	Maiestas knighti	7098	0	0	0	0	0	0	0	0	0	0	0	0	0	0	0	0	0	0	0	0	0	0	0	0	0	0	0	0	0	0	0	0	0	0	0	0	0	0	0	0	0
ASV536	TTTATCAGGCAATATCGCGCACTCCGGTCCCAGTGTTGACATATCAATTTTCTCACTACACTTAGCTGGAATCTCCTCAATCCTTGGGGCAGTGAATTTCATTACAACAGTAATAAACATACGACCTGAGGGAATATCTATAGACCGAACACCATTATTTGTTTGGTCAGTGATTATTACAGCCATTTTACTATTACTTTCCCTA	Arthropoda	Insecta	Hemiptera	Cicadellidae	Nesoclutha	Nesoclutha phryne	244	0	0	0	0	0	0	0	0	0	0	0	0	0	0	0	0	0	0	0	0	0	0	0	0	0	0	0	0	0	0	0	0	0	0	0	0	0	0	0	0	0
ASV537	CCTATCAAGAAATATCGCCCATGAAGGGCCTAGAGTAGACATATCTATTTTTTCATTGCACTTAGCTGGTATCTCTTCAATTCTAGGGGCAGTAAATTTTATTACAACAGTAATAAATATACGACCAAGAGGAATAACTATAGACCGAACACCACTATTTGTATGATCTGTGCTTATTACAGCTGTACTACTATTATTGTCACTA	Arthropoda	Insecta	Hemiptera	Cicadellidae	Orosius	Orosius argentatus	1306168	0	0	0	0	0	0	0	0	0	0	0	0	0	0	0	0	0	0	13045	15660	0	0	0	1	0	0	0	0	0	0	0	0	55	0	0	0	0	0	0	0	0
ASV538	ACTTTCAAGAAACATTGCTCACGAAGGACCTAGAGTAGATATATCTATTTTCTCCTTACACTTAGCAGGAATTTCATCAATTCTAGGTGCTGTTAATTTTATTACTACAGTAATAAATATACGACCAACAGGGATAACATTAGATCGAACCCCTTTATTTGTCTGATCCGTACTAATTACAGCTGTGTTATTATTGTTATCACTA	Arthropoda	Insecta	Hemiptera	Cicadellidae	Orosius	Orosius canberrensis	4917	0	0	0	0	0	0	0	0	0	0	0	0	0	0	0	0	0	0	0	0	0	0	0	0	0	0	0	0	0	0	0	0	0	0	0	0	0	0	0	0	0
ASV539	CCTATCAAGCAACATTGCTCACGAAGGACCTAGAGTGGATATATCTATTTTTTCGTTACACTTAGCAGGTATCTCCTCAATCCTGGGAGCAGTAAATTTTATTACAACAGTAATAAATATACGACCTATAGGAATAACTATAGATCGAACACCATTATTTGTATGATCTGTCCTTATTACAGCTGTTCTATTGTTATTATCCCTA	Arthropoda	Insecta	Hemiptera	Cicadellidae	Orosius	Orosius cellulosa	15228	0	7	5	0	0	13	3	0	5	0	0	4	22	382	0	77	30	193	0	5	1	200	197	0	0	0	684	0	37	12	215	14	94	120	84	0	0	0	0	0	0
ASV540	CTTATCTAGTAATATCGCTCACGAAGGACCTAGTGTAGATATATCTATTTTTTCATTGCACTTAGCAGGTATTTCATCAATTCTAGGAGCAGTAAATTTTATTACAACAGTTATTAACATACGGCCGACAGGAATAACTATAGATCGAACCCCTTTGTTTGTATGATCTGTACTTATTACAGCCGTTCTACTATTGCTGTCACTA	Arthropoda	Insecta	Hemiptera	Cicadellidae	Orosius	Orosius orientalis	12635	0	0	0	0	0	0	0	0	0	0	0	0	0	0	0	0	0	0	0	0	0	0	0	0	0	0	0	0	0	0	0	0	0	0	0	0	0	0	0	0	0
ASV541	ACTTTCAAGTAACATTGCACATGAAGGTCCTAGAGTGGACATATCAATTTTCTCATTGCACTTAGCAGGTGTATCATCAATCTTAGGAGCAGTAAATTTCATTACTACAGTAATTAATATACGACCAAGAGGAATAACAATAGACCGAACACCATTATTTGTATGATCTGTACTTATTACAGCTGTACTTTTATTATTATCATTA	Arthropoda	Insecta	Hemiptera	Cicadellidae	Orosius	Orosius pallidus	42200	0	0	0	0	0	0	0	0	0	0	0	0	0	0	0	0	0	0	0	0	0	0	0	0	0	0	0	0	0	0	0	0	0	0	0	0	0	0	0	0	0
ASV543	TCTATCAAGAGGAGTTTCACATTCAGGATCATGTGTTGATTTAACGATTTTTTCATTACATCTTGCGGGTGTATCTTCTATCTTAGGAGCTGTAAATTTTATTAGAACAATTTTGAATATGCGTTCAACGGGAATATATATAGATCGTGTACCTTTATTTGTATGATCTGTAATAATTACGGCGGTATTATTATTATTATCTTTA	Arthropoda	Insecta	Hemiptera	Cicadidae	Macrotristria	Macrotristria angularis	7167	0	0	0	0	0	0	0	0	0	0	0	0	0	0	0	0	0	0	0	0	0	0	0	0	0	0	0	0	0	0	0	0	0	0	0	0	0	0	0	0	0
ASV544	ATTATCTAGTAACTTATCACACAGAGGAGCATCTGTTGATTTAGCAATTTTTTCATTACACTTAGCAGGGGTTTCCTCAATTCTAGGAGCTGTAAATTTCATTTCAACTATTATCAATATGCGACCAGTAGGGATAACCCCAGAACGGACCCCTTTATTTGTATGATCAGTAGGGATTACGGCCTTACTTCTATTATTATCCTTG	Arthropoda	Insecta	Hemiptera	Coreidae	Mictis	Mictis profana	202069	0	0	0	0	0	0	0	0	0	0	0	0	0	34	0	0	0	0	0	0	0	0	0	0	0	0	0	0	0	0	0	0	0	0	0	0	0	0	0	0	0
ASV545	TCTATCTAGTGTTACCTCACATTCAGGACCTTCAGTTGATTTAACCATTTTCTCCCTCCACATTGCCGGGGTTAGATCAATTATAGGAGCTATCAATTTCATTTCAACAATCATTAATATGCGGTCTAAAAACTTTTCTATAGAAAAAATACCCCTCTTCTGTTGATCAGTTTTAATTACCGCAGTGTTACTGCTTCTTTCTTTA	Arthropoda	Insecta	Hemiptera	Delphacidae	Sogatella	Sogatella furcifera/vibix	3898	0	0	0	0	0	0	0	0	0	0	0	0	0	0	0	0	0	0	0	0	0	0	0	0	0	0	0	0	0	0	0	0	0	0	0	0	0	0	0	0	0
ASV546	TTTCAAGTGTAACTTCCCATTCTGGGCCTTCAGTAGATTTAACAATTTTCTCTCTTCATATTGCAGGAATTAGATCAATTATAGGAGCTATCAACTTTATTTCAACCATTATAAACATACGATCTAAAAATTTTTCAATAGAAAAAATACCCCTATTCTGTTGATCAGTTTTAATTACTGCAGTTCTATTGTTGTTATCACTC	Arthropoda	Insecta	Hemiptera	Delphacidae	Toya	Toya sp. KF227346.1	3575	0	0	0	0	0	0	0	0	0	0	0	0	0	0	0	0	0	0	0	0	0	0	0	0	0	0	0	0	0	0	0	0	0	0	0	0	0	0	0	0	0
ASV548	ACTATCAAGAAATATTGCACATGCAGGAGCAAGAGTTGATATATCTATTTTTTCACTGCACCTAGCTGGAATCTCATCAATTTTAGGAGCAGTTAACTTTATTTCAACAGTAATAAATATACGACCTACAGGAATATCGTTAGACCGAACACCGTTATTTGTTTGATCTGTATTAATCACTGCAGTATTACTTCTTCTATCTTTA	Arthropoda	Insecta	Hemiptera	Hemiptera sp.	Hemiptera sp.	Hemiptera sp. 01	1279991	0	0	0	0	0	0	0	0	0	0	0	0	0	0	0	0	0	0	0	0	0	0	0	0	0	0	0	0	0	0	0	0	0	0	0	0	0	0	0	0	0
ASV550	TCTTTCAAACAATATTGCACATAATAATATTTCAGTTGATTTAACCATTTTTTCATTACATCTAGCTGGAATCTCCTCTATTCTAGGAGCAATTAATTTTATTTGTACAATTTTAAATATAATACCCCACAATATAAAATTAAATCAAATCCCATTGTTTCCCTGATCAATTTTAATTACAGCTATTTTATTAATTCTTTCTTTA	Arthropoda	Insecta	Hemiptera	Hemiptera sp.	Hemiptera sp.	Hemiptera sp. 03	34	0	0	0	0	0	0	0	0	0	0	0	0	0	0	0	0	0	0	0	0	0	0	22	0	0	0	0	0	0	0	0	0	0	12	0	0	0	0	0	0	0
ASV554	ATTATCAAGTAACTTATCACATAATGGAAGATGTGTAGATTTAGCAATCTTCTCATTACATTTAGCAGGAGTTTCATCAATCCTAGGAGCAGTAAACTTTATCTCAACAATTTTAAATATACGACCAACAGGTATAACTCTTGAACGAATTCCTTTATTCGTATGATCAGTAGGAATCACTGCCCTACTACTTCTATTATCATTA	Arthropoda	Insecta	Hemiptera	Hemiptera sp.	Hemiptera sp.	Hemiptera sp. 07	51644	0	0	0	0	0	0	0	0	0	0	0	0	0	0	0	0	0	0	0	0	0	0	0	0	0	0	0	0	0	0	0	0	0	0	0	0	0	0	0	0	0
ASV555	TCTATCAAGTAACGTAGCTCATAGAGGAGCATCTGTAGATTTAGCAATCTTCTCATTACACTTAGCAGGTGTATCATCAATTCTTGGAGCCGTAAATTTCATTTCAACTATCATTAATATACGACCAGCCGGTATAACTCCAGAACGAATTCCATTATTTGTATGATCAGTAGGAATTACAGCTTTATTACTCTTATTATCTCTC	Arthropoda	Insecta	Hemiptera	Hemiptera sp.	Hemiptera sp.	Hemiptera sp. 08	124	0	0	0	0	0	0	0	0	0	0	0	0	0	0	0	0	0	0	0	0	0	0	0	0	0	0	0	0	0	0	0	0	0	0	0	0	0	0	0	0	0
ASV556	TTTATCAAGAAATTTATCTCACAGAGGAGCTTCAGTAGACTTAGCAATTTTTTCCCTTCACTTAGCAGGTGTATCATCAATTCTAGGAGCAGTAAATTTCATTTCAACAATTATCAATATACGACCAGCTGGGATAACACCAGAACGAATTCCCCTATTTGTATGATCAGTAGGAATCACAGCATTACTATTATTATTATCATTA	Arthropoda	Insecta	Hemiptera	Hemiptera sp.	Hemiptera sp.	Hemiptera sp. 09	438595	0	0	0	0	0	0	0	0	0	0	0	0	0	0	0	0	4	0	0	0	0	0	0	113711	0	0	0	0	3	0	0	0	0	0	0	0	0	0	0	0	0
ASV557	CTTATCCTCAAATATTGCTCATTCAGGGCCTAGAGTAGATATATCAATTTTCTCATTACACTTAGCTGGTATTTCATCTATTTTAGGTGCAGTAAATTTTATTACAACTATTTTTAATATGCGAGCACCAGGAATAAAAATAGATCAAACTCCATTATTTGTTTGGTCTGTATTAATTACAGCAATTCTTCTTCTCCTTTCACTG	Arthropoda	Insecta	Hemiptera	Hemiptera sp.	Hemiptera sp.	Hemiptera sp. 10	34398	0	0	0	0	0	0	0	0	0	0	0	0	0	0	0	0	0	0	0	0	0	0	0	0	0	0	0	0	0	0	0	0	0	0	0	0	0	0	0	0	0
ASV558	TCTTTCAAGAAATATTTCCCATAGAGGAACCTCAGTAGATCTAGCTATCTTTTCACTACATTTAGCAGGTGTATCCTCAATTCTAGGTGCAGTAAATTTTATTTCAACAATTATTAATATACGACCCAAAGGAATAATTCCTGAACGAGTACCCCTATTTGTTTGATCAGTAGGAATTACAGCTATTCTTCTTCTATTATCCCTG	Arthropoda	Insecta	Hemiptera	Hemiptera sp.	Hemiptera sp.	Hemiptera sp. 11	329	0	0	0	0	0	0	0	0	0	0	0	0	0	0	0	0	0	0	0	0	0	0	0	0	0	0	0	0	0	0	0	0	0	0	0	0	0	0	0	0	0
ASV559	ATTATCAAACAGATTATTTCATAGAGGAGCATCAGTAGATTTAGCCATCTTTTCATTACACTTAGCAGGAGTATCTTCAATTTTAGGGGCTATTAATTTTATTTCAACCATTATTAATATACGACCAACAGGAATAAAACCTGACCAAATCCCTCTATTTGTTTGATCAGTAGGAATTACTGCTCTACTTTTACTTTTATCATTA	Arthropoda	Insecta	Hemiptera	Hemiptera sp.	Hemiptera sp.	Hemiptera sp. 12	72547	0	0	0	0	0	0	0	0	0	0	0	0	0	0	0	0	0	0	0	0	0	0	0	0	0	0	0	0	0	0	0	0	0	0	0	0	0	0	0	0	0
ASV560	TTTATCATCAAATATTTCACATGCAGGAGCTTCTGTGGACTTAGCAATTTTCTCACTACACTTAGCAGGAGTGTCATCAATTCTAGGGGCAGTAAACTTTATCTCAACAATTATTAACATACGACCAGAAGGAATAGTAGCAGAACGAATCCCATTATTTGTATGATCTGTAGGAATCACTGCCTTACTACTACTCTTATCTCTA	Arthropoda	Insecta	Hemiptera	Hemiptera sp.	Hemiptera sp.	Hemiptera sp. 13	13985	0	0	0	0	0	0	0	0	0	0	0	0	0	0	0	0	0	0	0	0	0	0	0	0	0	0	0	0	0	0	0	0	0	0	0	0	0	0	0	0	13966
ASV561	ACTATCAAGTAATATTGCACATAACGGGGCATCCGTAGATTTAACAATCTTTTCACTACACTTAGCCGGTGTATCATCTATTTTAGGGGCAATTAATTTTATCTCAACTATTATTAACATACGAACAATTGGAATATCAAGAGAAAAAATTCCACTATTTGTCTGATCTGTAGGAATTACAGCATTATTGCTATTACTATCATTA	Arthropoda	Insecta	Hemiptera	Hemiptera sp.	Hemiptera sp.	Hemiptera sp. 14	5906	0	0	0	0	0	0	0	0	0	0	0	0	0	0	0	0	0	0	0	0	0	0	0	0	0	0	0	0	0	0	0	0	0	0	0	0	0	0	0	0	0
ASV562	ATTATCAAATAGATTATTTCATGAAGGAGCATCTGTAGATTTTGCAATTTTTTCACTACACCTAGCCGGAGTTTCTTCAATTTTAGGAGCTATTAATTTTATTTCAACTATTATTAATATACGACCTACAGGAATAACTCCAGATATAATTCCATTATTTGTATGATCAGTAGGAATTACAGCATTACTTTTATTATTATCTTTA	Arthropoda	Insecta	Hemiptera	Hemiptera sp.	Hemiptera sp.	Hemiptera sp. 15	1308	0	0	0	0	0	0	0	0	0	0	0	0	0	0	0	0	0	0	0	0	0	0	0	0	0	0	0	0	0	0	0	0	0	0	0	0	0	0	0	0	0
ASV563	ATTATCGAATAATTTATTCCATAGAGGACCATCAGTTGACATAGCAATTTTTTCATTACATTTAGCAGGAGTATCCTCAATTCTAGGAGCAATTAATTTCATTTCAACTATTATAAATATACGACCTGCAGGTATATTACCAGAACAAATCCCCCTATTTGTTTGATCAGTAGGTATTACTGCATTATTACTATTATTATCCTTA	Arthropoda	Insecta	Hemiptera	Hemiptera sp.	Hemiptera sp.	Hemiptera sp. GU671566.1	4629	0	0	0	0	0	0	0	0	0	0	0	0	0	0	0	0	0	0	0	0	0	0	0	0	0	0	0	0	0	0	0	0	0	0	0	0	0	0	0	0	0
ASV564	ATTATCAAATAATATTGCTCATAATAATATATCAGTTGATATAACTATTTTTTCTTTACATTTAGCAGGAATTTCATCAATTTTAGGAGCAATTAATTTTATCTGTACTATTTTAAATATAATACCAAATAATTTAAAAATTAATCAAATTCCCCTATTCCCATGATCAATCTTAATTACTGCAATTTTATTAATTTTATCTTTA	Arthropoda	Insecta	Hemiptera	Lachnidae	Essigella	Essigella californica	254	0	0	0	0	0	0	0	0	0	0	0	0	0	0	0	0	0	0	0	0	0	0	0	0	0	0	0	0	0	0	0	0	0	0	0	0	0	0	0	0	0
ASV566	ATTATCTAATTCTATATTCCATAGAGGTGCTCCTGTTGATATAGCAATTTTTTCATTACATTTAGCAGGTATTTCCTCAATTTTAGGAGCAATTAATTTTATCTCTACAATTATTAATATACGACCAGCAGGGATAACACCTGAAAAAACACCATTATTTGTATGATCAGTAGGTATTACAGCATTATTATTATTATTATCCTTA	Arthropoda	Insecta	Hemiptera	Lygaeidae	Nysius	Nysius caledoniae	2514776	0	0	0	0	0	0	0	0	7	0	0	0	0	30	10	5	0	34	0	2	4109	24	0	0	0	0	12	3	0	0	0	0	25	0	10	2	4	0	0	0	0
ASV567	ACTATCAGCAAATATTGCACATAATGGAGCATCTGTTGACTTAGCAATTTTCTCATTACACTTAGCTGGTATTTCATCAATTTTAGGAGCTGTAAATTTCATTTCAACAATTATTAATATACGACCAAATGGAATAAAGGCAGAAATAATTCCATTATTTGTATGATCAGTTGCTATTACAGCTGTATTATTATTATTATCATTA	Arthropoda	Insecta	Hemiptera	Miridae	Coridromius	Coridromius chenopoderis	50202	0	0	0	0	0	0	0	0	0	0	0	0	0	0	0	0	0	0	0	0	0	0	0	0	0	0	0	0	0	0	0	0	0	0	0	0	0	0	0	0	0
ASV568	CCTATCAGCTAATATTGCACATAATGGAGCATCAGTTGATTTAGCAATCTTCTCATTACATTTAGCAGGAGTATCATCAATTTTAGGTGCTGTAAATTTCATTTCAACAATTTTTAATATACGACCAGCTGGAATAACAGCTGAACGAATTCCTCTATTTGTTTGATCAGTAGGAATCACAGCTTTATTATTACTATTATCATTA	Arthropoda	Insecta	Hemiptera	Miridae	Creontiades	Creontiades dilutus	102541	0	0	0	0	0	0	0	0	0	0	0	0	0	0	0	0	0	0	0	0	0	0	0	0	0	0	0	0	0	0	0	0	0	0	0	0	0	0	0	0	0
ASV571	CCTTTCTAATAGACTATTCCATAGAGGAGCCTCCGTAGATCTAGCTATTTTCTCACTTCACTTAGCAGGTGTTTCATCTATTTTGGGAGCAATCAACTTTATTTCAACTATTATTAATATACGACCAGCAGGGATAAGTCCCGAACGCATCCCACTATTTGTTTGATCTGTAGGTATTACTGCATTATTACTATTATTATCATTA	Arthropoda	Insecta	Hemiptera	Oxycarenidae	Oxycarenus	Oxycarenus luctuosus	16449	0	0	0	0	0	0	0	0	0	38	0	0	0	0	0	0	0	0	2372	2755	0	0	0	0	0	0	0	0	0	0	0	0	0	0	0	0	0	0	0	0	0
ASV572	TTTATCAAGAAATATTTCCCACAGAGGAGCATCAGTAGATTTAGCAATCTTCTCATTACATTTAGCAGGAGCTTCATCAATTTTAGGGGCAATTAATTTTATTTCAACAATTTTAAATATACGAGTTACCGGGATAACTCCTGAACGAACTCCGCTATTTGTTTGATCAGTAGGAATTACTGCATTATTATTATTACTTTCTTTA	Arthropoda	Insecta	Hemiptera	Pachygronthidae	Stenophyella	Stenophyella macreta	16181	0	0	0	0	0	0	0	0	0	0	0	0	0	0	0	0	0	0	0	0	0	0	0	0	0	0	0	0	0	0	0	0	0	0	0	0	0	0	0	0	0
ASV573	ATTATCAAATAATATTGCTCATAATAATATTTCAGTAGATTTAACAATTTTCTCATTGCATCTAGCAGGAATTTCTTCAATTTTAGGAGCAATCAATTTTATCAGAACTATCATAAATATAATACCTAATAATCTTAAATTAAATCAAATTCCATTATTCCCATGATCAATCTTAATTACTGCATTATTATTAATTTTATCTTTA	Arthropoda	Insecta	Hemiptera	Pemphigidae	Tetraneura	Tetraneura nigriabdominalis	721665	0	0	0	0	0	0	0	0	0	0	4840	0	0	0	0	0	0	0	0	0	0	0	0	0	0	0	0	0	0	0	0	0	0	0	0	0	0	0	0	0	0
ASV574	ATTGTCAGGTATACAAAGTCACAGTGGTCCTAGTGTAGATTTAGCTATATTCGCACTTCACCTATCAGGTATAAGTAGTCTATTAGGAGCAATGAATTTTATAACAACTATACTAAATATGAGAAGTCCAGGAATAAGATTACACAAATTGGCTTTATTTGGATGAGCAGTAGTGGTTACAGCAGTTTTATTACTTTTATCTTTA	Arthropoda	Insecta	Hemiptera	Pentatomidae	Rhacognathus	Rhacognathus americanus	944	2	0	0	0	0	0	2	3	0	0	0	0	32	193	0	0	0	16	0	0	0	51	8	0	0	0	42	0	0	1	0	0	14	0	0	0	0	7	0	0	0
ASV576	TCTATCAAGTAACGTAGCTCATAGAGGAGCATCTGTAGATTTAGCAATCTTCTCATTACACTTGGCAGGTGTGTCATCAATTCTTGGAGCCGTAAATTTCATTTCAACTATTATTAACATACGACCGGCTGGTATAACTCCAGAACGAATTCCATTATTTGTATGATCAGTAGGAATTACAGCTTTATTACTCTTACTATCCCTC	Arthropoda	Insecta	Hemiptera	Reduviidae	Coranus	Coranus sp. nr JQ888573.1	57479	0	0	0	0	0	0	0	0	0	0	0	0	0	0	0	0	0	0	0	0	0	0	0	0	0	0	0	0	0	0	0	0	0	0	0	0	0	0	0	0	0
ASV577	CCTTTCTACTAATATATCTCATATAGGTGCCTCAGTTGATTTAGCCATTTTTAGACTACACCTAGCAGGTATTAGATCTATTTTAGGAGCAGTAAATTTTATTTCAACAATTATTAATATACGACCACAAGAAATAACACCTGAGCGAATTCCCTTATTTGTGTGGTCAGTTGGAATTACAGCACTTCTATTGCTTTTGAGACTG	Arthropoda	Insecta	Hemiptera	Reduviidae	Empicoris	Empicoris rubromaculatus	4835	0	0	0	0	0	0	0	0	1341	0	0	0	0	0	0	0	0	0	0	0	0	0	0	0	0	0	0	0	0	0	0	0	0	0	0	0	0	0	0	0	0
ASV578	ATTATCTAGAAATTTATCCCATAGAGGAGCTTCTGTAGATTTAGCAATTTTTTCATTACATTTAGCAGGAGTTTCATCAATTTTAGGTGCTATTAATTTTATTTCAACTATTATTAATATACGACCAGCAGGTATGACACCAGAACGAATACCATTATTTGTTTGATCAGTAGGTATTACTGCCCTTCTACTGTTATTATCTTTA	Arthropoda	Insecta	Hemiptera	Rhopalidae	Leptocoris	Leptocoris mitellatus	278780	0	0	0	0	0	0	0	0	0	0	0	0	0	0	0	0	0	0	0	0	0	0	0	0	0	0	0	140758	0	0	0	0	0	138008	0	0	0	0	0	0	0
ASV580	TCTATCTGCGAACATCTCACACAGAGGGGCATCAGTAGATCTAGCTATTTTTTCCCTACACTTAGCTGGTGTATCATCTATTCTTGGTGCAGTTAATTTTATCTCAACAATCATTAATATACGACCCGCAGGAATAACCTTAGATCGAATTCCATTATTTGTATGATCAGTAGGTATTACAGCACTACTTCTTCTACTCTCTTTA	Arthropoda	Insecta	Hemiptera	Thaumastocoridae	Thaumastocoris	Thaumastocoris peregrinus	127	0	0	0	0	0	0	0	0	0	0	0	0	0	0	0	0	0	0	0	0	0	0	0	0	0	0	0	0	0	0	0	0	0	0	0	0	0	0	0	0	0
ASV581	TTTATCAACTAACATTTCACATATAGGGCCATCAGTTGATATAGCAATCTTTTCACTACATTTAGCAGGAGTTTCATCTATTCTAGGAGCAATCAACTTTATTACAACAGTAATTAATATACGACCAACAGGTATATCATTAGAAAAGACCCCACTATTTGTTTGATCAGTAATTATTACAGCAGTATTATTATTACTATCTCTA	Arthropoda	Insecta	Hemiptera	Tingidae	Tingidae sp.	Tingidae sp.	1917	0	0	0	0	0	0	0	0	0	0	0	0	0	0	0	0	0	0	0	0	0	0	0	0	0	0	0	0	0	0	0	0	0	0	0	0	0	0	0	0	0
ASV582	TTTATCAAATTCAACTTTCCATAGTGGATACTCAGTAGATACAGCTATCTTTTCCCTACATTTAGCAGGAATCTCATCAATTCTAGGAGCAATTAATTTTATTACAACAATTCTTAACATACGAAGATGTAATCATAAAATTGAAAAAATACCATTGTTTGCTTGATCTGTTTTAATTACAGCTTTCTTACTTTTACTAGCGCTC	Arthropoda	Insecta	Hemiptera	Triozidae	Casuarinicola	Casuarinicola cf warrigalensis	14129	0	0	0	0	0	0	0	0	0	0	0	0	0	0	0	0	0	0	0	0	0	0	0	0	0	0	0	0	0	0	0	0	0	0	0	0	0	0	0	0	2866
ASV583	ACTATCAAGTAATATTGCACATAACGGGGCATCAGTAGATTTAACAATCTTTTCACTACACTTAGCCGGTGTATCATCTATTTTAGGGGCAATTAATTTTATCTCAACTATTATTAACATACGAACAATTGGAATATCAAGAGAAAAAATTCCACTATTTGTCTGATCTGTAGGAATTACAGCATTATTGCTATTACTATCATTA	Arthropoda	Insecta	Hemiptera	Veliidae	Veliidae sp.	Veliidae sp.	2258	0	0	0	0	0	0	0	0	0	0	0	0	0	0	0	0	0	0	0	0	0	0	0	0	0	0	0	0	0	0	0	0	0	0	0	0	0	0	0	0	0
ASV585	ATTATCAGCATATTTATATCATTCATCATCATCAGTTGATTTTGCAATTTTTCCCTTTCATATATCAGGAATTTCATCAATTATAGGATCATTAAATTTAATAGTTACAATTATAATAATAAAAAATTTTTCTTTAAATTACGATCAAATTTCACTATTTCCATGATCAGTTTTTATTACAGCAATTTTATCAATTATATCATTA	Arthropoda	Insecta	Hymenoptera	Apidae	Apidae sp.	Apidae sp.	1963	0	0	0	0	0	0	0	0	0	0	0	0	0	0	0	0	0	0	0	0	0	0	0	0	0	0	0	0	0	164	0	0	0	0	0	0	0	0	0	0	0
ASV586	ATTATCAGCATATTTATATCATTCTTCACCTTCAGTAGATTTTGCAATTTTTTCTCTTCATATATCAGGAATTTCCTCAATTATAGGATCATTAAACTTAATAGTTACAATTATAATAATAAAAAATTTTTCTATAAATTATGACCAAATTTCATTATTTCCATGATCAGTTTTTATTACAGCAATTTTATTAATTATATCATTA	Arthropoda	Insecta	Hymenoptera	Apidae	Apis	Apis mellifera	285867	0	0	0	0	0	0	0	0	0	0	0	0	0	0	0	0	0	0	0	0	0	0	0	0	0	0	0	0	0	3879	0	0	28	0	0	0	0	0	0	0	0
ASV587	ATTATCAGCATATTTATATCATTCATCACCATCAGTTGATTTTGCAATTTTTTCTCTTCATATATCAGGAATTTCATCGATTATAGGATCGTTAAACTTAATAGTTACAATTATAATAATAAAAAAATTTTTCTTTAAATTACGATCAAATTTCTCTATTTCCATGATCAGTTTTTATTACAGCAATTTTATTAATTATATCATTA	Arthropoda	Insecta	Hymenoptera	Apidae	Apis	Apis sp.	3671	0	0	0	0	0	0	0	0	0	0	0	0	0	0	0	0	0	0	0	0	0	0	0	0	0	0	0	0	0	201	0	0	0	0	0	0	0	0	0	0	0
ASV589	CCTTTCTTCCTACCTGTACCACCCCTCTCCTGCTGTAGATTTTACTATTTTTTCTATCCATATGACTGGGATTTCCTCTATTCTAGGATCTCTGAATTTTATTGTAACTATTTTTATGATAAAAAATCTTTCTCTTAACTACGATCAGATTACCCTATTCTCATGGTCTATTTCAGTTACTGTAATTTTACTAATTCTTTCCTTA	Arthropoda	Insecta	Hymenoptera	Apidae	Tetragonula	Tetragonula carbonaria	141	0	0	0	0	0	0	0	0	0	0	0	0	0	0	0	0	0	0	0	0	0	0	0	0	0	0	0	0	0	0	0	0	0	0	0	0	0	0	0	0	0
ASV590	ATTATCAAGAAACATTGCTCATGCAGGAAGATCTGTTGATTTAACTATTTTTTCATTACATTTAGCAGGAATTTCATCTATCTTAGGGGCAATAAATTTTATTTCAACAATTATTAACATACGTACCCCTGGAATAAGATTTGATAAAATATCTTTATTTTCTTGAGCTGTAGGTATCACAGCACTATTATTACTTCTGTCATTA	Arthropoda	Insecta	Hymenoptera	Argidae	Schizocerella	Schizocerella pilicornis	15488	0	0	0	0	0	0	0	0	0	0	0	0	0	0	0	0	0	0	0	0	0	0	0	0	0	0	0	0	0	0	0	0	0	0	0	0	0	0	0	0	0
ASV591	TTTATCCTCAAATTTAGGACAAATAGGAGCTTCAATAGATTTAGCAATTTTTTCTCTTCATATTGCAGGAGCTTCATCTATTATAGGAGCAATTAATTTTATTTCTACAATTATAAATATATATAATAAAAATATATCAATAAAAAATCTAACTTTATTTATTTGATCAGTTTTAATTACTGCCATTTTATTATTATTATCATTA	Arthropoda	Insecta	Hymenoptera	Bethylidae	Bethylidae sp.	Bethylidae sp. 1	155	0	0	0	0	0	0	0	0	0	0	0	0	0	0	0	0	0	0	0	0	0	0	0	0	0	0	0	0	0	0	0	0	0	0	0	0	0	0	0	0	0
ASV592	TTTATCATCTAATATTGGTCAAATAGGTTCTTCAATAGATTTTGCCATTTTTGCTCTTCATATTGCCGGAATATCTTCAATTATAGGAGCAATTAATTTTATTTCCACTATTTTAAATATATTTAATATTAATCTTAAAATTTCTAATTTAACTTTATTTACTTGATCTGTATTAATTACAGCAATTCTTCTTTTATTATCTCTT	Arthropoda	Insecta	Hymenoptera	Bethylidae	Bethylidae sp.	Bethylidae sp. 2	106	0	0	0	0	0	0	0	0	0	0	0	0	0	0	0	0	0	0	0	0	0	0	0	0	0	0	0	0	106	0	0	0	0	0	0	0	0	0	0	0	0
ASV593	ATTATCATTAATTTTAGGACATGGAGGTATATCAGTAGATATAGGAATTTTTTCCTTACATCTAGCTGGAGCATCATCAATTATAGGAGCAATTAATTTTATTACTACAATTATAAATATACGAATTAATCTTTTTATTATAGACAAAATATCATTATTTATTTGATCAGTATTCATTACAGCTATTTTATTACTATTATCATTA	Arthropoda	Insecta	Hymenoptera	Braconidae	Apanteles	Apanteles ippeus	212	0	0	0	0	0	0	0	0	0	0	0	0	0	0	0	0	0	0	0	0	0	0	0	0	0	0	0	0	0	0	0	0	0	0	0	0	0	0	0	0	0
ASV594	ATTATCATTAATTTTAGGACATGGAGGTATATCAGTAGATATAGGAATTTTTTCTCTTCACCTAGCTGGAATTTCATCAATTATAGGAGCTGTAAATTTCATTACTACTATTATAAATATACGAATTAATTTATTTATTATAGACAAAATATCTTTATTTATTTGATCTGTATTTATTACAGCTATTTTATTATTATTATCACTA	Arthropoda	Insecta	Hymenoptera	Braconidae	Apanteles	Apanteles sp. 1	6627	0	0	0	0	0	0	0	0	0	0	0	0	0	0	0	0	0	0	0	0	0	0	0	0	0	0	0	0	0	0	0	0	0	0	0	0	0	0	0	0	0
ASV595	ATTATCTTCTAGAATTGGTCATAGTGGAATTTCTGTTGATTTAGCTATTTTTTCTTTACATTTGGCTGGGGTATCATCAATTATAGGAGTTATTAATTTTTTGACAACTATTTTTAATATAAAATTTTATATAATTAAAATAGAGCAATTAAGATTATTTGTATGATCTATTTTAATTACAGCTGTTTTATTATTATTATCTTTA	Arthropoda	Insecta	Hymenoptera	Braconidae	Aphaereta	Aphaereta aotea	616	0	0	0	0	0	0	0	0	0	0	0	0	0	0	0	0	0	0	0	0	0	0	0	0	0	0	0	0	0	0	0	0	0	0	0	0	0	0	0	0	0
ASV598	ATTATCTTTAAATATTGGGCATGGAGGTATTTCAGTTGATTTAGCAATTTTTTCTTTACATTTGGCTGGTATTTCATCAATTATAGGAGCTATTAATTTTATTACAACTATTTTAAATATACGTCCTAATTGATTAAATATAGATAAAATTGCATTATTAGCATGATCAGTATTAATTACTGCAATTTTATTATTACTTTCTTTA	Arthropoda	Insecta	Hymenoptera	Braconidae	Braconidae sp.	Braconidae sp. 1	259	0	0	0	0	0	0	0	0	0	0	0	0	0	0	0	0	0	0	0	0	0	0	0	0	0	0	0	0	0	0	0	0	0	0	0	0	0	0	0	0	0
ASV599	ATTATCTTCATTAATTGGTCATGGTGGTGTTTCTGTAGATTTAGCTATTTTTTCTTTACATTTAGCAGGTGCATCTTCGATTATAGGGGCAATTAATTTTATTACAACTATTTTTAATATAAATTTTTATAAAATTAAGTTTGATCAATTAAGTTTATTAATTTGATCAATTTTAATTACAGCTTTATTATTATTATTATCTTTA	Arthropoda	Insecta	Hymenoptera	Braconidae	Braconidae sp.	Braconidae sp. 2	3771	0	0	0	0	0	0	0	0	0	0	0	0	0	0	0	0	0	0	0	0	0	0	0	0	0	0	0	0	0	0	0	0	0	0	0	0	0	0	0	0	0
ASV600	TTTATCATCAAGAATTGGTCATAGAGGAATATCTGTGGATTTAGCTATTTTTTCATTACATTTAGCAGGTGTTTCTTCAATTATAGGTGCAATTAATTTTATTACAACAATTTTTAATATAAATTTTTATATAATTAAATTTGATCAGTTGAGTTTATTAATTTGATCAATTTTAATTACTGCTGTTTTATTATTATTATCTTTA	Arthropoda	Insecta	Hymenoptera	Braconidae	Braconidae sp.	Braconidae sp. 3	4362	0	0	0	0	0	0	0	0	0	0	0	0	0	0	0	0	0	0	0	0	0	0	0	0	0	0	0	0	0	0	0	0	0	0	0	0	0	0	0	0	0
ASV602	ATTGTCTTTAATTTTAGGTCATGGGGGTATATCAGTTGATTTAGGTATTTTTTCTTTACATTTAGCTGGTGCTTCATCAATTATGGGTGCTGTAAATTTTATTACTACAATTATTAATATACGTTCAAATTTATTTAATATAGATAAGATATCTTTATTTACTTGGTCAGTATTTATTACTGCAATTTTATTATTGTTATCTTTA	Arthropoda	Insecta	Hymenoptera	Braconidae	Braconidae sp.	Braconidae sp. 5	199584	0	0	4152	0	0	0	0	0	0	0	0	0	0	0	0	0	0	0	657	1481	2	0	0	0	0	0	0	0	0	0	0	0	0	0	0	0	0	0	0	0	0
ASV603	ATTATCATTAATTTTAGGTCATGGAGGAATATCAGTAGATATAGGAATTTTTTCCTTACACTTAGCTGGAATATCTTCAATTATAGGTGCAGTAAATTTTATTACTACAATTTTAAATATACGAATTAATTTATTCCTAATAGATAAAATATCTTTATTTATTTGATCAGTATTTATTACAGCAATTTTATTATTATTATCATTA	Arthropoda	Insecta	Hymenoptera	Braconidae	Braconidae sp.	Braconidae sp. 6	22118	0	0	0	0	0	0	0	0	0	0	0	0	0	0	0	0	0	0	0	0	0	0	0	0	0	0	0	0	0	0	0	0	0	0	0	0	0	0	0	0	0
ASV604	TTTATCTTTAAATATAAGTCATAGGGGAATATCAGTAGATTTAGCAATTTTTTCTTTACATATTGCAGGTATATCTTCAATTATAGGAGCTATTAATTTTATTACTACTATTTTAAATATGTGAATAATTAATATTAAAATTGATAAAATACCTTTATTAATTTGATCAATTTTTATTACGGCAATTTTATTATTATTATCATTA	Arthropoda	Insecta	Hymenoptera	Braconidae	Braconidae sp.	Braconidae sp. 7	6766	0	0	0	0	0	0	0	0	0	0	0	0	0	0	0	0	0	0	0	0	0	0	0	0	0	0	0	0	0	0	0	0	0	0	0	0	0	0	0	0	0
ASV605	ATTATCTTCAGGATTAGGTCATGGTGGTATTTCAGTTGATTTAGCTATTTTTTCTTTACATTTAGCAGGGGTATCTTCAATTATAGGGGCTATTAATTTTATTACAACAATTTTAAATATAAATTTTTATATAATTAAATTGGATCAATTAAGTTTATTAGTTTGATCAATTTTAATTACTGCAATTTTGTTATTATTATCATTA	Arthropoda	Insecta	Hymenoptera	Braconidae	Braconidae sp.	Braconidae sp. 8	671	0	0	0	3	21	0	0	0	0	0	0	0	0	0	0	0	0	0	0	0	0	0	0	0	0	0	0	0	0	0	0	0	0	0	0	0	0	0	0	0	0
ASV606	TTTATCATTAATTTTAGGTCATGGTGGAATATCAGTTGATATAGGAATTTTTTCTTTACATTTAGCCGGAGCTTCTTCAATTATAGGAGCAGTAAATTTTATTACAACAATTTTAAATATACGAGTAAATTTATTTATTATAGATAAATTATCTTTATTTATTTGATCAGTTTTCATTACAGCTATTTTATTATTATTATCTCTA	Arthropoda	Insecta	Hymenoptera	Braconidae	Braconidae sp.	Braconidae sp. 9	163	0	0	0	0	0	0	0	0	0	0	0	0	0	0	0	0	0	0	0	0	0	0	0	0	0	0	0	0	0	0	0	0	0	0	0	0	0	0	0	0	0
ASV607	TTTATCTTTATTGTTAGGGCATAGGGGAATTTCAGTAGATTTATCAATTTTTTCTTTACATTTAGCAGGGGTTTCTTCAATTATAGGATCAATTAATTTTATTGTGACTATTTTGAATACTTGAATAAAATCAAATTTTATAGATAAATTTTCTTTATTTGTTTGATCTGTTTTTATTACAACTATTTTATTGTTATTATCATTG	Arthropoda	Insecta	Hymenoptera	Braconidae	Chelonus	Chelonus blackburni	42	0	0	0	0	0	0	0	0	0	0	0	0	0	0	0	0	0	0	0	0	0	0	0	0	0	0	0	0	0	0	0	0	0	0	0	0	0	0	0	0	0
ASV608	TTTATCTTTATTGTTAGGACATAGAGGGATTTCAGTAGATTTATCAATTTTTTCTTTACATTTAGCGGGGGTTTCTTCAATTATAGGATCAATTAATTTTATTGTGACTATTTTAAATACTTGAATAAAATCAAATTTTATAGATAAATTTTCTTTATTTGTTTGATCTGTTTTTATTACAACTATTTTATTATTATTATCATTA	Arthropoda	Insecta	Hymenoptera	Braconidae	Chelonus	Chelonus sp. nr blackburni	26	0	0	0	0	0	0	0	0	0	0	0	0	0	0	0	0	0	0	0	0	0	0	0	0	0	0	0	0	0	0	0	0	0	0	0	0	0	0	0	0	0
ASV609	ATTATCTTTAACATTAGGTCATAATGGAATAGCTGTTGATTTTGCTATTTTTTCTTTACATCTGGCTGGTATTTCTTCTATTATAGGATCAATTAATTTTATTAGAACAATTTTTAATATACGATGTAATAATATTTCAATAGATCAAATTTCTTTATTGGTTTGATCAGTTTTAATTACGACTATTTTATTATTATTATCTTTA	Arthropoda	Insecta	Hymenoptera	Braconidae	Diaeretus	Diaeretus essigellae	2854	0	0	0	0	0	0	0	0	0	0	0	0	0	0	0	0	0	0	0	0	0	0	0	0	0	0	0	0	0	0	0	0	0	0	0	0	0	0	0	0	0
ASV610	TTTATCTTCAATTATTGGTCATAGTGGAATATCTGTTGATTTGGCAATTTTTTCTTTACATTTAGCTGGGGTTTCTTCAATTATAGGAGCAATTAATTTTATTACAACTATTTTTAATATAAATTTTATTTCAATAAAATTAGATCAAATAAGATTATTTATTTGATCAATTTTAATTACAGCTATTTTATTATTATTATCTTTA	Arthropoda	Insecta	Hymenoptera	Braconidae	Dinotrema	Dinotrema sp. nr KR782894.1	4031	0	0	0	0	0	0	0	0	0	0	0	0	0	0	0	0	0	0	0	0	0	0	0	0	0	0	0	0	0	0	0	0	0	0	0	0	0	0	0	0	0
ASV611	TTTATCATTAATTTTAGGTCATGGAGGTTTATCAGTTGATTTAGGAATTTTTTCTTTACATTTAGCCGGTGCATCATCTATTATAGGGGCTGTTAATTTTATTACAACAATTATTAATATACGAACTAATTTATTTAATATAGATAAAATATCTTTATTTTCTTGATCTGTATTTATTACTGCTATTTTATTATTATTATCTTTA	Arthropoda	Insecta	Hymenoptera	Braconidae	Dolichogenidea	Dolichogenidea tasmanica	10858	0	0	0	0	0	0	0	0	0	0	0	0	0	0	0	0	0	0	0	0	0	0	0	0	0	0	0	0	0	0	0	0	0	0	0	0	0	0	0	0	0
ASV612	ATTATCTTTAAATATTGGACATGGTGGAATATCAGTTGATTTAGCTATTTTTTCTTTACATTTGGCTGGAATTTCTTCAATTATAGGGGCTGTTAATTTTATTTCTACTATTTATAATATACGAAATTCTATTAATATAGAAAATATTTCTTTATTTACTTGATCTATTTTAATTACAGTAATTTTATTATTATTATCTTTA	Arthropoda	Insecta	Hymenoptera	Braconidae	Homolobus	Homolobus sp. nr MW056205.1	3589	0	0	0	0	0	0	0	0	0	0	0	0	0	0	0	0	0	0	0	0	0	0	0	0	0	0	0	0	0	0	0	0	0	0	0	0	0	0	0	0	0
ASV614	ATTATCTTCTTTGGTTGGACATGGGGGAATTTCTGTAGATTTAGCTATTTTTTCTTTACATTTAGCTGGTATATCTTCTATTATAGGAGCTATTAATTTTATTACTACTATTTTTAATATAAATTTATTTAATATAAAAATAGATCAAGTTAGTTTATTAATTTGGTCAGTATTAATTACTGCATTATTATTATTATTATCTTTA	Arthropoda	Insecta	Hymenoptera	Braconidae	Mesocentrus	Mesocentrus sp. MT639574.1	941	0	0	0	0	0	0	0	0	0	0	0	0	0	0	0	0	0	0	0	0	0	0	0	0	0	0	0	0	300	0	0	0	0	0	0	0	0	0	0	0	0
ASV616	ATTATCATCAATTAATTACCACCCATCATTATCAGTTGATTTCACAATTTTTTCACTTCATATTGCAGGAATTTCATCAATTATAGGTGCTATTAACTTCATTGTAACTATTTTAAATATAAAAAATTTAAATTTAAAATATAGACAAATAACTCTATTTTCTTGATCTGTACTAATTACAGCTATCTTATTACTTTTATCATTA	Arthropoda	Insecta	Hymenoptera	Colletidae	Hylaeus	Hylaeus chlorosomus	4176	0	0	0	0	0	0	0	0	0	0	0	0	0	0	0	0	0	0	0	0	0	0	0	0	0	0	0	0	0	9	341	0	72	0	0	0	0	0	0	0	0
ASV617	ATTATCAACAATTTTATATCATCCTTCATTATCAGTTGATTTAACAATTTTTTCACTACATATTGCAGGTATTTCATCAATTATAGGAGCAATTAATTTCATTGTAACAATTCTAAATATAAAAAATATAGGATTAAAATATGATCAAATAACTTTATTCTCATGATCAGTCCTAATTACTGCAATTTTATTATTATTATCTTTA	Arthropoda	Insecta	Hymenoptera	Colletidae	Hylaeus	Hylaeus sp. JN578906.1	69377	0	0	0	0	0	0	0	0	0	0	0	0	0	0	0	0	0	0	0	0	0	0	0	0	0	0	0	0	0	0	0	0	0	0	0	0	0	0	0	0	0
ASV618	CTTATCATCAATTATATATCATCCTTCAATATCTGTAGATCTTACAATTTTTTCACTTCATATTGCAGGAATTTCATCAATTATAGGAGCAATTAATTTTATTGTCACAATTTTAAATATAAAAAACTTAAGTTTAAAATATGATCAAATAACTTTATTTTCATGATCAATTTTAATTACAACAATTTTATTACTTTTATCACTA	Arthropoda	Insecta	Hymenoptera	Colletidae	Hylaeus	Hylaeus vittatifrons	256	0	0	0	0	0	0	0	0	0	0	0	0	0	0	0	0	0	0	0	0	0	0	0	0	0	0	0	0	184	0	0	0	72	0	0	0	0	0	0	0	0
ASV620	TTTATCCTCTATTAGATTCCATAATAACTCTTCAGTTGATCTAGCTATTTTCTCACTACATATTGCAGGTATATCATCAATTATAGGAGCAATTAATTTCATTGTTACAATTATAAATTTAAAAAATAATAATTTATCAATAGATCAAATTCCTTTATTTGCATGATCCGTATTAATTACAGCTATTTTACTTTTATTATCCTTA	Arthropoda	Insecta	Hymenoptera	Crabronidae	Crabronidae sp.	Crabronidae sp. 1	1259	0	0	0	0	0	0	0	0	0	0	0	0	0	0	0	0	0	0	0	0	0	0	0	0	0	0	0	0	0	0	0	0	0	0	0	0	0	0	0	0	0
ASV621	TTTATCTTCAATTTTAGGACATAGTGGATGTTCAGTAGATTTATCTATTTTTTCTCTTCATATTGCAGGAGCTTCTTCAATTATAGGAGCAATTAATTTTATTGTAACTTTATTAAATATACACAATAAAAATTTAAATTTAGATCAATTAAGATTATTTTCTTGATCAGTATTTATTACAGCAATTTTATTATTATTATCTTTA	Arthropoda	Insecta	Hymenoptera	Crabronidae	Crabronidae sp.	Crabronidae sp. 2	7661	0	0	0	0	0	0	0	0	0	0	0	0	0	0	0	0	0	0	0	0	0	0	0	0	0	0	0	0	0	0	0	0	0	0	0	0	0	0	0	0	0
ASV622	TTTATCTTTAACTATGGGACATAATGGATATTCAGTAGATTTATCAATTTTTTCTTTACATATTGCTGGTATTTCTTCTATTATAGGAGCAATTAATTTTATTGTTACTATTACAAAAATACATAATAAATCTCTAAAATTTGATCAAGTTTCTTTATTTCCTTGATCTATTATAATTACTGCTGTGTTGTTATTATTATCTTTA	Arthropoda	Insecta	Hymenoptera	Crabronidae	Pison	Pison sp. 1	24882	0	0	0	0	0	0	0	0	0	0	0	0	0	0	22077	2803	0	0	0	0	0	0	0	0	0	0	0	0	0	0	0	0	0	0	0	0	0	0	0	0	0
ASV623	TTTATCTACTTTAGGTCATAATGGTTATTCAGTAGATTTATCAATTTTTTCGCTTCATATTGCAGGAATTTCTTCTATTATAGGTGCTATTAATTTTATTGTAACAATTAAAAAAATACATAATAAATCTTTAAATTTTGATCAAGTTTCTTTATTTCCTTGATCAATTATTATTACTGCAGTTTTATTATTATTATCTTTA	Arthropoda	Insecta	Hymenoptera	Crabronidae	Pison	Pison sp. 2	786	0	0	0	0	0	0	0	0	0	0	0	0	0	0	0	0	0	0	0	0	0	0	0	0	0	0	0	0	0	0	0	0	0	0	0	0	0	0	0	0	0
ASV624	TTTATCTTTAACTATAGGTCATAATGGATATTCTGTTGATTTATCTATTTTTTCTTTACATATTGCAGGTATTTCTTCTATTATAGGTGCAATTAATTTTATTGTTACTATTAGAAAAATACATAATAAATCTTTAAATTTTGATCAAGTTTCTTTATTTCCTTGATCTATTATAATTACAGCTGTTTTATTATTATTATCTTTA	Arthropoda	Insecta	Hymenoptera	Crabronidae	Pison	Pison sp. 3	153	0	0	0	0	0	0	0	0	0	0	0	0	0	0	0	0	0	0	0	0	0	0	0	0	0	0	0	0	0	0	0	0	0	0	0	0	0	0	0	0	0
ASV626	TTTATCTTCAATTTTAGGTCATAGAGGTTGTTCAGTAGATTTATCTATTTTTTCTCTTCATATTGCTGGAATTTCTTCTATTATAGGAGCTATTAATTTTATTGTTACTTTATTAAATATGCATAATAAAAATTTAAATTTTGATCAATTAAGTTTATTTTCTTGATCAGTTTTTATTACTGCAATTTTATTATTATTATCTTTA	Arthropoda	Insecta	Hymenoptera	Crabronidae	Prosopigastra	Prosopigastra sp. HM423454.1	405	0	0	0	0	0	0	0	0	0	0	0	0	0	0	0	0	0	0	0	0	0	0	0	0	0	0	0	0	0	0	0	0	0	0	0	0	0	0	0	0	0
ASV627	ATTATCTTCTAATTTAGGTCATATAGGATGTTCAGTTGATATTTCAATTTTTTCTTTACATATTGCAGGAGTTTCATCAATTATAGGATCAATTAATTTTATTGTAACAATTAAAAATATAGTAAATAAAGGTTTATATTTTGATCAAATTCCATTATTTGTATGATCAGTAATGATTACTGCAATTTTATTATTATTATCATTA	Arthropoda	Insecta	Hymenoptera	Crabronidae	Tachysphex	Tachysphex sp. 1	100	0	0	0	0	0	0	0	0	0	0	0	0	0	0	0	0	0	0	0	0	0	0	0	0	0	0	0	0	0	0	0	0	0	0	0	0	0	0	0	0	0
ASV630	CTTATCTCATAATATTTCTCATAGAAGAATATCAGTAGATTTAACTATTTTATCTCTTCATTTAGCAGGAGCTTCATCAATTATGGGAGCAATTAATTTTATTGCAACAATTTTAAATATAATTCATAATAATATAAAATTAACTCAAATAAATTTATTTATTTGATCAATTTTTATTACAGTAATTTTATTATTATTATCTTTA	Arthropoda	Insecta	Hymenoptera	Dryinidae	Dryinidae sp.	Dryinidae sp.	1448	0	0	0	0	0	0	0	0	0	0	0	0	0	0	0	0	0	0	0	0	0	0	0	0	0	0	0	0	0	0	0	0	0	0	0	0	0	0	0	0	0
ASV631	TCTGTCAGGAAACATTTCTCATAGAAGAATTTCAGTTGATTTAGCTATTTTCTCACTACATATTGCAGGAATCTCATCAATTATAGGAGCTATAAATTTTATTGCAACTATCCTAAATATATACCATATTAAATCAAACTTAGATCAAATTAATTTATTTATTTGATCTATTTTATTAACAGCTATTTTACTTTTATTATCTTTA	Arthropoda	Insecta	Hymenoptera	Dryinidae	Gonatopus	Gonatopus zealandicus	179	0	0	0	0	0	0	0	0	0	0	0	0	0	0	0	0	0	0	0	0	0	0	0	0	0	0	0	0	0	0	0	0	0	0	0	0	0	0	0	0	0
ASV632	TTTACATCAAATTTATGACATACAGGTCCATCAGTTGATTTATCAATTTTTTCTTTACATATATTGCAGGAATTTCTTCAATTATAGGATCTATTAATTTTATTTCTACTATTTTAAATATAAAAATTTATAAAATTGGAATAATTCCTTTATTTGCTTGAGCAATATTATTAACAGCAATTTTAATATTATTATCATTA	Arthropoda	Insecta	Hymenoptera	Eulophidae	Ophelimus	Ophelimus sp. 1	525	0	0	0	0	0	0	0	0	0	0	0	0	0	0	0	0	0	0	0	0	0	0	0	0	0	0	0	0	0	0	0	0	0	0	0	0	0	0	0	0	0
ASV634	TCTAGCCTCTAACACTTTTCATAGAGGACCTTCTATTGATTTAACTATTTTCTCTCTTCATATTGCAGGTATATCTTCAATTATAGGAGCAATTAATTTTATTTCAACAATCTTAAACATACATAATATTAATATTTCCTTAGATAAAATCCCCCTTTTAGTCTGATCTATCCTTATCACTGCTATTCTTCTATTACTATCTCTG	Arthropoda	Insecta	Hymenoptera	Formicidae	Camponotus	Camponotus claripes	141159	0	0	0	0	0	0	0	0	0	0	0	0	0	0	0	0	0	0	0	0	0	0	0	0	0	0	0	0	0	0	0	0	0	0	17844	0	0	0	0	0	0
ASV635	TCTGGCTTCTAACACTTTTCATAGTGGACCATCTGTTGACTTAACTATCTTTTCCCTTCATATTGCAGGAATATCATCAATTCTTGGAGCAATTAACTTTATCTCAACAATTTTAAATATACATAACATTAATATCTCCTTAGATAAAATCCCCCTTCTAGTTTGGTCTATTCTTATTACAGCTATCCTACTTCTATTATCCTTA	Arthropoda	Insecta	Hymenoptera	Formicidae	Camponotus	Camponotus consobrinus	557	0	0	0	0	0	0	0	0	0	0	0	0	0	0	0	0	0	0	0	0	0	0	0	0	0	0	0	0	0	0	0	0	0	0	0	0	0	0	0	0	0
ASV636	TTTAGCTTCTAATACTTTTCATAGAGGACCTTCAATTGATCTAACTATTTTTTCTCTACACATTGCAGGAATATCTTCTATTCTTGGTGCAATTAACTTTATCTCAACAATTTTAAATATACATAACATCAATATTTCTTTAGACAAAATTCCTCTTTTAGTATGATCAATTCTTATTACTGCAATTCTCCTTTTATTATCTCTT	Arthropoda	Insecta	Hymenoptera	Formicidae	Camponotus	Camponotus sp. 01	21703	0	0	0	0	0	0	0	0	0	0	0	0	0	0	0	0	0	0	0	0	0	0	0	0	0	0	0	0	0	0	0	83	0	1353	0	0	0	0	0	0	0
ASV637	TTTAGCTTCTAATACTTTTCATAGGGGATCTTCAATTGATTTAACTATTTTTTCTCTTCATATTGCAGGTATATCTTCAATTCTTGGGGCAATTAACTTTATTTCAACTATCTTAAATATACATAATATTAATATTTCTTTAGACAAAATCCCCCTTTTAGTATGATCAATTCTCATTACTGCTATTCTTCTTTTATTATCCCTT	Arthropoda	Insecta	Hymenoptera	Formicidae	Camponotus	Camponotus sp. 02	330	0	0	0	0	0	0	0	0	0	0	0	0	0	0	0	0	0	0	0	0	0	0	0	0	0	0	0	0	0	0	0	0	0	43	0	0	0	0	0	0	0
ASV638	TTTAGCTTCTAATACTTTCCATAGAGGACCTTCAATTGACCTAACCATTTTCTCTCTCCATATTGCAGGTATATCTTCTATTCTTGGCGCAATTAACTTTATTTCAACAATCTTAAATATACATAATATTAATATCTCTTTAGATAAAATCCCCCTTTTAGTTTGATCAATTCTCATTACTGCTATTCTTCTTCTTTTATCTCTT	Arthropoda	Insecta	Hymenoptera	Formicidae	Camponotus	Camponotus sp. 03	222	0	0	0	0	0	0	0	0	0	0	0	0	0	0	0	0	0	0	0	0	0	0	0	0	0	0	0	0	0	0	0	0	0	0	0	0	0	0	0	0	0
ASV639	TTTAGCTTCTAATACTTTCCATATAGGACCTTCAATTGATTTAACTATTTTTTCCCTTCATATCGCAGGAATATCCTCTATCCTTGGGGCCATTAATTTTATTTCAACAATCCTAAATATACATAATATCAATATTTCTCTAGATAAAATCCCACTTTTAGTTTGATCAATTCTTATTACTGCTATTCTTCTTCTTCTATCTCTT	Arthropoda	Insecta	Hymenoptera	Formicidae	Camponotus	Camponotus sp. 04	3367	0	0	0	0	0	0	0	0	0	0	0	0	0	0	0	0	0	0	0	0	0	0	0	0	0	0	0	0	0	0	0	0	0	0	0	0	0	0	0	0	0
ASV642	ATTAGCCTCTAATACTTTTCATAGAGGGCCTTCTATTGATCTAACTATTTTTTCTCTTCATATTGCAAATATATCTTCAATTATAGGGGCAATTAATTTTATTTCAACAATCTTAAATATACATAATATTAATATTTCCTTAGATAAAATTCCCCTATTAGTGTGATCTATTCTTATCACTGCCATTCTCCTTCTCTTATCCCTA	Arthropoda	Insecta	Hymenoptera	Formicidae	Camponotus	Camponotus sp. 07	193	0	0	0	0	0	0	0	0	0	0	0	0	0	0	0	0	0	0	0	0	0	0	0	0	0	0	0	0	0	0	0	0	0	0	6	0	0	0	0	0	0
ASV643	ATTAGCCTCTAACACCTTCCATAGAGGCCCCTCTATTGATATAACTATCTTTTCTCTTCATATCGCAGGTATATCCTCAATTCTAGGCGCAATTAACTTTATCTCAACAATCTTAAATATACATAATATCAATATCTCTTTAGACAAAATCCCCTTACTAGTATGATCCATTTTAATTACAGCTATCCTTCTCCTCCTATCCCTA	Arthropoda	Insecta	Hymenoptera	Formicidae	Camponotus	Camponotus sp. 08	52710	0	0	0	0	0	0	0	0	0	0	0	0	0	0	0	0	0	0	0	0	0	0	0	0	0	0	0	0	0	0	0	0	0	0	0	0	0	0	0	0	0
ASV644	TTTAGCTTCTAATACCTTTCATAGAGGCCCCTCTATTGATTTAACTATTTTCTCTCTTCATATTGCTGGAATGTCATCAATTTTAGGAGCAATTAATTTTATTTCAACAATCCTAAATATACATAATATTAATATTTCTTTAGATAAAATCCCTCTTCTAGTTTGATCAATTCTTATTACAGCAATCCTTCTTCTTTTATCCCTT	Arthropoda	Insecta	Hymenoptera	Formicidae	Camponotus	Camponotus sp. 09	1104	0	0	0	0	0	0	0	0	0	0	0	0	0	0	0	0	0	0	0	0	0	0	0	0	0	0	0	0	0	0	0	0	0	0	0	0	0	0	0	0	0
ASV645	ATTAGCTTCTAATACCTTTCATAGAGGACCTTCTGTTGACCTAACTATTTTTTCCCTTTATATCGCAGGAATATCCTCAATTATAGGAGCAATTAATTTTATTTCTACAATTTTAAATATACATAATATTAATATTTCATTAGATAAAATTCCTCTCTTAGTATGATCTATTCTTATTACAGCTATTCTACTTCTTTTATCCCTA	Arthropoda	Insecta	Hymenoptera	Formicidae	Camponotus	Camponotus sp. 10	1463	0	0	0	0	0	0	0	0	0	0	0	0	0	0	0	0	0	0	0	0	0	0	0	0	0	0	0	0	0	0	0	0	0	0	275	0	0	0	0	0	0
ASV646	ATTAGCTTCTAATACTTTTCACAGAGGACCATCTATTGATTTAACTATTTTTTCCCTCCACATTGCAAGAATATCATCAATTCTTGGGGCAATCAATTTCATCTCATCAATTTTAAATATACATAATATTAATATTTCCTTAGATAAAATCCTCCTTTTAGTATGATTTATCCTTATTACAGCTATTCTTCTTCTTTTATCCCTT	Arthropoda	Insecta	Hymenoptera	Formicidae	Camponotus	Camponotus sp. 11	58	0	0	0	0	0	0	0	0	0	0	0	0	0	0	0	0	0	0	0	0	0	0	0	0	0	0	0	0	0	0	0	0	0	0	0	13	0	0	0	0	0
ASV647	ATTAGCTTCTAATACTTTTCACAGAGGGCCTTCTATTGATTTAACTATTTTTTCTCTTCATATTGCAGGAATATCCTCAATTCTTGGCGCAATCAATTTTATCTCAACAATTTTAAATATACATAATATTAACATTTCTTTAGATAAAATCCCTCTTTTAGTATGATCTATTCTTATTACAGCTATTCTTCTTCTTTTATCTCTC	Arthropoda	Insecta	Hymenoptera	Formicidae	Camponotus	Camponotus sp. 12	89	0	0	0	0	0	0	0	0	0	0	0	0	0	0	0	0	0	0	0	0	0	0	0	0	0	0	0	0	0	5	0	0	0	0	0	0	0	0	0	0	0
ASV648	TTTAGCGTCTAATACATTTCATAGGGGACCTTCTATTGATTTAACTATTTTTTCTCTTCATATTGCAGGAATATCATCAATTCTTGGGGCAATTAACTTTATCTCAACAATCTTAAATATACATAATATTAATATTTCTTTAGATAAAATCCCCCTTCTAGTTTGATCTATTCTTATCACTGCTATTCTCCTTCTCCTCTCACTT	Arthropoda	Insecta	Hymenoptera	Formicidae	Camponotus	Camponotus sp. 13	706	0	0	0	0	0	0	0	0	0	0	0	0	0	0	0	0	0	0	0	0	0	0	0	0	0	0	0	0	0	0	0	0	0	0	0	0	0	0	0	0	0
ASV649	CCTAGCTTCTAATACTTTTCATAGGGGCCCATCTATTGATTTAACTATTTTTTCCCTTCATATTGCAGGAATATCCTCTATTCTCGGAGCTATTAATTTTATCTCAACAATTCTAAATATACATAATATTAATATCTCCTTAGATAAAATCCCACTTTTAGTTTGATCTATTCTTATTACAGCTATCCTTCTTCTATTATCCTTA	Arthropoda	Insecta	Hymenoptera	Formicidae	Camponotus	Camponotus sp. 14	177	0	0	0	0	0	0	0	0	0	0	0	0	0	0	0	0	0	0	0	0	0	0	0	0	0	0	0	0	0	0	0	0	0	0	0	0	0	0	0	0	0
ASV650	TCTAGCTTCTAATACTTTCCATAGAGGCCCATCTATTGATCTGACTATTTTTTCCCTTCATATTGCAGGAATATCCTCTATTCTTGGGGCTATTAACTTTATTTCAACAATTTTAAATATACATAATATTAATATTTCTTTAGATAAAATTCCACTTTTAGTTTGATCTATTCTTATTACAGCTATCCTTCTTCTATTATCCTTA	Arthropoda	Insecta	Hymenoptera	Formicidae	Camponotus	Camponotus sp. 15	35583	0	0	0	0	0	0	0	0	0	0	0	0	0	0	0	0	0	0	0	0	0	0	0	0	0	0	0	0	0	927	0	0	0	0	0	0	0	0	0	0	0
ASV651	ACTAGCTTCTAATACCTTCCATAGAGGCCCATCTATTGATTTAACTATTTTCTCTCTCCATATTGCAGGAATATCTTCTATTCTTGGGGCTATTAACTTTATTTCAACAATTCTAAATATACATAATATTAATATCTCTTTAGATAAAATCCCACTTCTAGTTTGATCTATCCTTATCACAGCTATCCTTCTTTTACTATCCCTT	Arthropoda	Insecta	Hymenoptera	Formicidae	Camponotus	Camponotus sp. 16	217	0	0	0	0	0	0	0	0	0	0	0	0	0	0	0	0	0	0	0	0	0	0	0	0	0	0	0	0	0	0	0	0	0	0	0	0	0	0	0	0	0
ASV653	CTTAGCTTCTAATACATTCCATAGAGGACCCTCTATTGACTTAACTATTTTCTCCCTTCATATTGCAGGAATATCTTCAATTCTTGGAACTATTAACTTTATCTCAACAATTTTAAATATACATAATATTAACATCTCTTTAGATAAAATTCCTCTTTTAGTTTGATCTATTCTTATTACGGCTATCCTCCTTCTATTATCCTTA	Arthropoda	Insecta	Hymenoptera	Formicidae	Camponotus	Camponotus sp. 18	889	0	0	0	0	0	0	0	0	0	0	0	0	0	0	0	0	0	0	0	0	0	0	0	0	0	0	0	0	0	55	0	0	0	0	0	0	0	0	0	0	0
ASV654	TCTAGCTTCTAATTCCTTCCATAGAGGACCTTCTGTTGATCTAACTATCTTTTCTCTTCACATTGCAGGAATATCATCAATTCTTGGTGCAATTAATTTTATCTCAACAATTTTAAACATACATAATATTAATATTTCCTTAGATAAAATTCCCCTTTTAGTATGATCTATTCTTATTACAGCAATTCTTCTTCTTCTATCACTT	Arthropoda	Insecta	Hymenoptera	Formicidae	Camponotus	Camponotus sp. nr aenopilosus	570	0	0	0	0	0	0	0	0	0	0	0	0	0	0	0	0	0	0	0	0	0	0	0	0	0	0	0	0	0	0	0	0	0	0	0	90	0	0	0	0	0
ASV655	ATTAGCTTCAAATACTTTTCATAGAGGACCTTCTATTGATTTAACTATTTTTTCACTACATATTGCAGGAATATCTTCTATTCTTGGAGCTATTAATTTTATTTCAACAATTCTAAATATACATAATATTAATATTTCTTTAGATAAAATTCCCCTATTAGTTTGATCTATTCTTATTACTGCTATTCTTCTCTTACTTTCCCTT	Arthropoda	Insecta	Hymenoptera	Formicidae	Camponotus	Camponotus sp. nr evae	975	0	0	0	0	0	0	0	0	0	0	0	0	0	0	0	0	0	0	0	0	0	0	0	0	0	0	0	0	12	0	0	0	0	0	0	0	0	0	0	0	0
ASV657	TTTAGCATCCAATATTTTTCACAGAGGCTCTTCTATCGACTTATCAATTTTTTCCCTTCATATTGCAGGAATATCATCCATTTTAGGAGCAATCAATTTCATCTCCACAATTCTAAACATACATCATAAAAATTCTTCCCTAGATAAAATCCCCCTATTAGTCTGATCAATTTTAATCACAGCTATTCTTTTACTACTCTCCCTC	Arthropoda	Insecta	Hymenoptera	Formicidae	Cardiocondyla	Cardiocondyla minutior	888	0	0	0	0	0	0	0	0	0	0	0	0	0	0	0	0	0	0	0	0	0	0	0	0	0	0	0	0	0	0	0	0	0	0	0	0	0	0	0	0	0
ASV659	CCTAGCTTCTAATATTTTTCATAGGGGAGCTTCAATTGACCTATCTATTTTTTCCCTCCATATTGCTGGTATATCATCAATTCTTGGTGCTATCAATTTTATTTCTACAATTATTAATATACATCATAAAAGTTTTACAATAGATAAAATTCCCCTTCTTGTTTGATCAATTATAATTACAGCAATTCTTCTTCTTTTATCTCTT	Arthropoda	Insecta	Hymenoptera	Formicidae	Formicidae sp.	Formicidae sp. 01	70818	0	0	0	0	0	0	0	0	0	0	0	0	0	0	0	0	0	0	0	0	0	0	0	0	0	0	0	0	0	0	0	0	0	0	0	0	0	0	0	0	0
ASV660	TTTAGCTTCTAATATTTTTCACAGAGGGGCTTCAATTGACCTATCTATTTTTTCTCTCCATATTGCTGATATATCATCAATTCTTGGCGCTATTAATTTTATCTCTACAATTATTAATATACATCATAAAAGTTTTACAATAGATAAAATTCCTCTTCTTGTTTGATCAATTATAATTACAGCAATTTTACTACTATTATCCCTT	Arthropoda	Insecta	Hymenoptera	Formicidae	Formicidae sp.	Formicidae sp. 02	215	0	0	0	0	0	0	0	0	0	0	0	0	0	0	0	0	0	0	0	0	0	0	0	0	0	0	0	0	0	0	0	0	0	0	0	0	0	0	0	0	0
ASV661	ACTAGCTTCTAATATTTTTCATAGAAGAGCATCAATTGACCTATCTATTTTTTCCTTACATATCGCCGGTATATCATCAATTCTAGGAGCTATTAATTTTATCTCAACAATTATTAATATACACCATAAAAATTTTACAATAGATAAAATTCCTCTTCTCGTCTGATCAATCATAATTACAGCAATTTTATTACTCTTATCCCTT	Arthropoda	Insecta	Hymenoptera	Formicidae	Formicidae sp.	Formicidae sp. 03	1608	0	0	0	0	0	0	0	0	0	0	0	0	0	0	0	0	0	0	0	0	0	0	0	0	0	0	0	0	0	0	0	0	0	0	0	0	0	0	0	0	0
ASV662	ATTAGCTTCTAATATTTTTCACAGGGGAGCATCTATTGACCTATCTATTTTCTCCCTCCATATTGCTGGTATATCATCAATTCTAGGAGCCATTAATTTTATTTCAACTATTATTAATATACACCATAAAAATTTCACTATAGATAAAATTCCTCTTTTAGTCTGATCAATTATAATTACAGCAATTTTATTACTCTTATCCCTC	Arthropoda	Insecta	Hymenoptera	Formicidae	Formicidae sp.	Formicidae sp. 04	29907	0	0	0	0	0	0	0	0	0	0	0	0	0	0	0	0	0	0	0	0	0	0	0	0	0	0	0	0	0	0	0	0	0	0	0	0	0	0	0	0	0
ASV663	TTTAGCTTCTAATATTTTTCATAGGGGAGCATCAATTGACCTATCTATTTTTTCCTTACATATTGCTGGTATATCATCAATTCTCGGAGCCATTAATTTTATCTCAACGATTATTAATATGCACCATAAAAATTTTACAATAGATAAAATTCCTCTCCTAGTTTGATCAATCATAATTACAGCAATTTTATTACTTTTATCCCTT	Arthropoda	Insecta	Hymenoptera	Formicidae	Formicidae sp.	Formicidae sp. 05	1553	0	0	0	0	0	0	0	0	0	0	0	0	0	0	0	0	0	0	0	0	0	0	0	0	0	0	0	0	0	0	0	0	0	0	0	0	0	0	0	0	0
ASV664	TTTAGCTTCTAATATTTTTCATAGGGGAGCATCAATTGACCTTTCTATCTTTTCTCTTCATATTGCTGGTATATCATCAATTCTTGGAGCCATTAATTTTATTTCAACTATTATTAACATACATCATAAAAATTTTACAATAGATAAAATTCCTCTTTTAGTTTGATCAATCATAATTACAGCAATCTTATTACTTTTATCTCTC	Arthropoda	Insecta	Hymenoptera	Formicidae	Formicidae sp.	Formicidae sp. 06	1234	0	0	0	0	0	0	0	0	0	0	0	0	0	0	0	0	0	0	0	0	0	0	0	0	0	0	0	0	0	0	0	0	0	0	0	0	0	0	0	0	0
ASV665	ATTAGCTTCTAATATTTTCCATAGAGGCGCATCAATTGATTTATCAATTTTTTCTTTACATATTGCAGGTATATCATCAATCCTGGGAGCAATTAACTTTATCTCAACAATTATTAATATACATCACAAAAATTTTACAATAGATAAAATTCCCCTTCTTGTCTGATCTATCATAATCACAGCAATTTTATTACTTTTATCTCTC	Arthropoda	Insecta	Hymenoptera	Formicidae	Formicidae sp.	Formicidae sp. 07	278	0	0	0	0	0	0	0	0	0	0	0	0	0	0	0	0	0	0	0	0	0	0	0	0	0	0	0	0	0	0	0	0	0	0	0	0	0	0	0	0	0
ASV666	TCTAGCATCTAACATTTTTCATAGAGGACCTTCAGTAGATTTAGCTATTTTTTCCCTACATATTGCAGGGATATCTTCAATCCTTGGAGCTATTAACTTTATTGCAACTATCTTAAATATACATCATAAATCATTCTCTTTAGATAAAATCTCCTTATTAACCTGATCTATCCTAATTACCGCAATCCTCCTCCTTTTATCCCTC	Arthropoda	Insecta	Hymenoptera	Formicidae	Formicidae sp.	Formicidae sp. 08	452	0	0	0	0	0	0	0	0	0	0	0	0	0	0	0	0	0	0	0	0	0	0	0	0	0	0	0	0	0	0	0	0	0	0	0	0	0	0	0	0	0
ASV667	CTTAGCTTCAAATATTTTTCACAGAGGGGCCTCTGTAGATCTCGCAATCTTCTCCCTTCATATTGCAGGAATATCCTCAATCCTAGGAGCTATTAATTTTATTGCAACTATCTTAAATATACACCATAAATCTTTTTCTTTAGATAAAATTTCTTTACTAACCTGATCTATCTTAATTACTGCAATTCTTCTCCTCCTCTCACTT	Arthropoda	Insecta	Hymenoptera	Formicidae	Formicidae sp.	Formicidae sp. 09	243	0	0	0	0	0	0	0	0	0	0	0	0	0	0	0	0	0	0	0	0	0	0	0	0	0	0	0	0	0	0	0	0	0	0	0	0	0	0	0	0	0
ASV669	CTTAGCTTCTAATATCTTCCATAATGGACCATCAATTGATCTGACCATTTTTTCCTTACACATTGCCGGAATATCCTCTATCCTAGGGGCTATTAATTTCATCTCCACAATTATAAATATACATCATAAGAATTGTTCAATAGATAAAATTCCTCTATTAGTTTGATCTATTTTAATTACAGCAATCCTTTTATTATTATCTCTA	Arthropoda	Insecta	Hymenoptera	Formicidae	Formicidae sp.	Formicidae sp. 11	25234	0	0	0	0	0	0	0	0	0	0	0	0	0	0	0	0	0	0	0	0	0	0	0	0	0	0	0	0	0	0	0	0	0	0	0	0	0	0	0	0	0
ASV670	TTTAGCTTCTAACATCTTTCATAATGGACCATCAATTGACTTAACCATCTTTTCCTTACACATTGCAGGAATATCCTCTATTCTAGGAGCAATTAATTTTATTTCTACAATCCTAAACATACACCATAAAAATTGTTCAATAGATAAAATTCCTCTATTAGTTTGATCTATTTTAATTACAGCAATTCTTTTATTATTATCTCTA	Arthropoda	Insecta	Hymenoptera	Formicidae	Formicidae sp.	Formicidae sp. 12	11002	0	0	0	0	0	0	0	0	0	0	0	0	0	0	0	0	0	0	0	0	0	0	0	0	0	0	0	0	0	0	0	0	0	0	0	0	0	0	0	0	0
ASV671	TTTAGTCTTTAACATTTTTCATAATGAATTTTCAATTGATTTAACTATTTTTTCCTTACATATTGCAGGTATATCCTCCATCTTAGGAGCAATTAATTTTATTTCTACAATTTTAAACATACATCATAAAAATTATTCTATAGATAAAATTCTTTTATTAGTATGGTCTATTCTAATTACAGCAATCCTTCTATTACTTTCACTC	Arthropoda	Insecta	Hymenoptera	Formicidae	Formicidae sp.	Formicidae sp. 13	2789	0	0	0	0	0	0	0	0	0	0	0	0	0	0	0	0	0	0	0	0	0	0	0	0	0	0	0	0	0	0	0	0	0	0	0	0	0	0	0	0	0
ASV672	TTATCCTCAAATATTTTTCACAATGGACCATCAATTGATCTATCAATCTTTTCTCTTCATATCGCAGGTATATCATCAATCTTAGGAGCAATTAATTTTATTTCCACAATCTTTAATATATTTAACAAAAATTTTACTAAAGAAAAAATTCCTTTACTTGTTTGATCAATTCTTATTACAGCAATCCTTTTACTCTTATCATTA	Arthropoda	Insecta	Hymenoptera	Formicidae	Formicidae sp.	Formicidae sp. 14	8486	0	0	0	0	0	0	0	0	0	0	0	0	0	0	0	0	0	0	0	0	0	0	0	0	0	0	0	0	0	0	0	0	0	0	0	0	0	0	0	0	0
ASV673	TCTTTCCTCTAATATCTTCCACAGAGGACCATCAATTGACCTCTCAATCTTCTCTCTTCATATTGCTGGTATATCATCCATTTTAGGAGCCATCAATTTTATCTCAACAATTCTTAATATACATCATAAAAATATTTCTCTAGATAAAATTCCCCTACTTGTTTGATCAATTCTTATTACTGCTATCTTACTCCTCTTATCTCTA	Arthropoda	Insecta	Hymenoptera	Formicidae	Formicidae sp.	Formicidae sp. 15	47	0	0	4	0	0	0	0	0	0	0	0	0	0	0	0	2	0	0	0	0	0	0	0	0	0	0	0	0	0	0	0	0	0	0	17	0	0	0	0	0	0
ASV674	ACTAGCTTCTAATATTTATCATAATGGAGCTTCAGTAGATTTAGCCATTTTCTCTCTTCATATTGCTGGAATATCTTCAATTTTAGGAGCTATTAATTTTATCTCTACAATTATTAATATACACCATAAAAGATTAACAATAGATAAAATCCCTCTTCTAGTTTGATCTATTTTAATCACAGCCATCTTACTTCTTCTATCTCTC	Arthropoda	Insecta	Hymenoptera	Formicidae	Formicidae sp.	Formicidae sp. 16	2551	0	0	0	0	0	0	0	0	0	0	0	0	0	0	0	0	0	0	0	0	0	0	0	0	0	0	0	0	0	0	0	0	0	0	0	0	0	0	0	0	0
ASV675	CTTAGCCTCTAATATCTACCATAATGGAGTCTCAGTAGATCTAGCAATTTTCTCCCTTCATATCGCTGGAATATCTTCAATTTTAGGGGCAATTAATTTTATCTCTACAATTATTAATATACACCACAAAAGATTAACAATAGACAAAATTCCTCTTTTAGTATGATCAATTTTAATTACAGCTATTTTACTTCTTCTCTCCCTC	Arthropoda	Insecta	Hymenoptera	Formicidae	Formicidae sp.	Formicidae sp. 17	2634	0	0	0	0	0	0	0	0	0	0	0	0	0	0	0	0	0	0	0	0	0	0	0	0	0	0	0	0	29	1	0	0	0	0	1200	0	0	0	0	0	0
ASV676	ACTTTCCTCTAACCTATATCACAATGGATTTTCTATAGATCTTACTATCTTTTCCCTTCATATTGCTGGTATATCCTCTATTATAGGTTCAATTAACTTTATTTCTACTATTATTAATATACACCATTATAAATTATTTATTGATAAAATTCCTCTTTTAATTTGATCCATTCTTATCACTACCATTCTTCTTCTTCTATCTCTT	Arthropoda	Insecta	Hymenoptera	Formicidae	Formicidae sp.	Formicidae sp. 18	24265	0	0	0	0	0	0	0	0	0	0	0	0	0	0	0	0	0	0	0	0	0	0	0	0	0	0	0	0	0	0	0	0	0	0	0	0	0	0	0	0	0
ASV677	TCTTGCCTCCAATATCTATCATAATGGGCCTTCAGTAGATTTAGCTATTTTCTCTCTTCATATTGCAGGAATATCTTCAATTTTAGGTGCTATTAACTTTATCTCCACAATTATCAATATACACCATAAAAGATTAACTATAGATAAAATCCCCCTTCTAGTATGATCTATTTTAATTACAGCCATCTTACTCCTTCTATCTCTT	Arthropoda	Insecta	Hymenoptera	Formicidae	Formicidae sp.	Formicidae sp. 19	2261	0	0	0	0	0	0	0	0	0	0	0	0	0	0	0	0	0	0	0	0	0	0	0	0	0	0	0	0	0	0	0	0	0	0	0	0	0	0	0	0	0
ASV678	TTTAGCCTCTAATATTTATCATAATGGAGCTTCAATAGATTTAGCCATCTTCTCTCTTCATATTGCTGGTATGTCTTCAATTTTAGGAGCAATTAATTTTATCTCTACAATCATTAATATACATCATAAAAGATTAACAATAGATAAAATCCCCCTATTAGTTTGATCTATTTTAATTACAGCTATTTTACTTCTCCTATCTCTC	Arthropoda	Insecta	Hymenoptera	Formicidae	Formicidae sp.	Formicidae sp. 20	404	0	0	0	0	0	0	0	0	0	0	0	0	0	0	0	0	0	0	0	0	0	0	0	0	0	0	0	0	0	0	0	0	0	0	0	0	0	0	0	0	0
ASV679	CCTTTCATCTAATTTATATCATAATGGATTCTCTACTGACTTAGCAATTTTTTCCCTTCATATTGCAGGTATATCCTCTATTTTAGGAGCAATCAATTTTATTACAACTATTATTAATATACATCATAAAAATATCTCTATTGATAAAATCCCTTTACTAATCTGATCAATTCTAATTACAGCAATTCTACTATTACTCTCACTT	Arthropoda	Insecta	Hymenoptera	Formicidae	Hypoponera	Hypoponera opacior	14248	0	0	0	0	0	0	0	0	0	0	0	0	0	0	0	0	0	0	0	0	0	0	0	0	0	0	0	0	0	0	0	0	0	0	0	0	0	0	0	0	0
ASV680	TCTATCATTAAACCTTTACCATAATGGATTTTCTACTGATTTTGCTATTTTCTCTTTACATATTGCTGGAATATCATCAATTTTAGGAGCAATTAACTTTATTTCTACTATCATTAATATACATCATAAATTTATTTCTATTGACAAAATCCCTTTATTAATTTGATCAATTTTAATTACAGCAATTTTACTACTCTTATCTCTT	Arthropoda	Insecta	Hymenoptera	Formicidae	Hypoponera	Hypoponera punctatissima	14882	0	0	0	0	0	0	0	0	0	0	0	0	0	0	0	0	0	0	0	0	0	0	0	0	0	0	0	0	0	0	0	0	0	0	0	0	0	0	0	0	0
ASV681	TTTAGCCTCAAATATATTTCATAATGGACCATCTGTAGATTTAGCTATTTTTTCTCTTCACATTGCAGGAATATCTTCAATTTTAGGAGCAATTAATTTTATTTCTACTATCTTAAATATACACCATAAAAATTTTACTATAGATAAAATTCCTCTATTAGTTTGATCAATTCTAATTACAGCTATTCTATTACTCTTATCTCTA	Arthropoda	Insecta	Hymenoptera	Formicidae	Iridomyrmex	Iridomyrmex anceps	122593	0	0	0	0	0	0	0	0	0	0	4	0	0	0	0	0	67	0	0	0	0	0	0	0	18970	223	0	0	0	0	0	0	0	0	44	0	0	0	0	0	0
ASV682	TTTAGCCTCAAATATATTTCATAATGGACCATCTGTAGATTTAGCTATTTTTTCTCTTCATATTGCTGGAATATCTTCAATTTTAGGAGCCATTAATTTTATTTCTACTATTTTAAATATACATCATAAAAATTTTAATATAGATAAAGTTCCTCTATTAGTCTGATCTATTTTAATTACTGCTATTTTATTACTTTTATCTTTA	Arthropoda	Insecta	Hymenoptera	Formicidae	Iridomyrmex	Iridomyrmex purpureus/spadius	2153549	0	0	0	0	0	0	0	0	0	0	0	0	0	0	0	0	0	0	0	0	0	0	0	0	0	0	0	0	0	0	0	0	0	0	0	0	0	0	22	24	0
ASV684	CCTAGCTTCTAATATATTTCATAATGGACCTTCTGTAGATTTAGCTATTTTTTCCCTCCATATCGCTGGTATATCTTCAATTCTAGGGGCAATTAATTTTATTTCTACCATCCTAAATATACATCATAAAAATTTCTCTATAGATAAAATCCCCCTCTTAGTTTGATCAATTTTAATTACTGCCATTTTATTACTATTATCTTTA	Arthropoda	Insecta	Hymenoptera	Formicidae	Iridomyrmex	Iridomyrmex sp. 02	46622	0	0	0	0	0	0	0	0	0	0	0	0	0	0	0	0	0	0	0	0	0	0	0	0	0	0	0	0	0	0	0	0	0	0	0	0	0	0	0	0	0
ASV685	TCTAGCTTCAAATATATTTCATAATGGCCCATCTGTAGACTTAGCTATTTTTTCTCTTCATATTGCTGGAATATCTTCAATCCTTGGGGCAATTAATTTTATTTCAACTATCTTAAATATACATCATAAAAATTTTACTATAGATAAAGTCCCCTTATTAGTCTGATCAATTTTAATTACTGCCATTCTCCTACTCTTATCTCTT	Arthropoda	Insecta	Hymenoptera	Formicidae	Iridomyrmex	Iridomyrmex sp. 03	11125	0	0	0	0	0	0	0	0	0	0	0	0	0	0	0	0	0	0	0	0	0	0	0	0	0	0	0	0	0	0	0	0	0	0	0	0	0	0	0	0	0
ASV686	TTTAGCTTCAAACATATTTCATAATGGCCCATCTGTAGACCTAGCTATTTTTTCTCTTCATATCGCTGGGATATCTTCAATTCTCGGAGCAATTAATTTTATCTCAACCATTCTAAATATACATCATAAAAATTTTACTATAGATAAAGTTCCTCTTTTAGTTTGATCAATTTTAATTACCGCTATTCTTCTTCTTCTATCCCTT	Arthropoda	Insecta	Hymenoptera	Formicidae	Iridomyrmex	Iridomyrmex sp. 04	330	0	0	0	0	0	0	0	0	0	0	0	0	0	0	0	0	0	0	0	0	0	0	0	0	0	0	0	0	0	0	0	0	0	0	0	0	0	0	0	0	0
ASV688	TTTAGCCTCAAATATATTTTATAATGGTCCATCTGTAGACTTAGCTATTTTTTCTCTTCATATTGCTGGAATATCCTCAATGTTAGGAGCAATCAATTTTATTTCTACCATTTTAAATATACATCATAAAAACTTTTCTATAGACAAAATTCCTCTACTAGTTTGATCAATTTTAATTACTGCCATCTTATTACTTCTATCTTTA	Arthropoda	Insecta	Hymenoptera	Formicidae	Iridomyrmex	Iridomyrmex sp. 06	109	0	0	0	0	0	0	0	0	0	0	0	0	0	0	0	0	0	0	0	0	0	0	0	0	0	0	0	0	0	0	0	0	0	0	0	0	0	0	0	0	0
ASV690	TCTAGCTTCAAATATATTTCATAATGGACCATCTGTAGATTTAGCTATCTTCTCTCTTCATATCGCAGGAATATCTTCAATTTTAGGAGCAATTAATTTTATTTCTACCATTTTAAATATACATCACAAAAATTTTACCATAGATAAAATTCCTCTACTAGTTTGATCAATTTTAATTACTGCTATTCTATTACTCTTATCTTTA	Arthropoda	Insecta	Hymenoptera	Formicidae	Iridomyrmex	Iridomyrmex sp. 08	627	0	0	0	0	0	0	0	0	0	0	0	0	0	0	0	0	0	0	0	0	0	0	0	0	0	0	0	0	0	0	0	0	0	0	0	0	0	0	0	0	0
ASV691	CTTAGCATCAAACATATTTCATAATGGACCATCTGTAGACTTAGCTATTTTCTCTCTTCATATTGCAGGAATATCCTCAATCTTAGGAGCAATTAATTTTATCTCTACTATTTTAAATATACATCATAAAAATCTCACCATAGACAAAATTCCTTTATTAGTTTGATCAATCCTAATCACTGCTATTCTATTACTTTTATCCTTA	Arthropoda	Insecta	Hymenoptera	Formicidae	Iridomyrmex	Iridomyrmex sp. 09	48486	0	0	2617	9	1115	0	0	0	0	0	0	0	0	0	0	0	0	0	0	0	0	0	0	0	0	0	0	0	0	0	0	0	0	0	0	0	0	0	0	0	0
ASV692	TTTAGCATCAAACATATTTCATAATGGACCATCAGTAGATCTAGCCATTTTCTCTCTTCACATTGCAGGAATATCTTCAATTCTAGGAGCAATCAACTTTATTTCTACTATCCTAAATATACATCATAAAAATATTACTATAGACAAAATTCCTTTATTAGTTTGATCAATTCTAATTACTGCTATTTTATTATTATTATCATTA	Arthropoda	Insecta	Hymenoptera	Formicidae	Iridomyrmex	Iridomyrmex sp. 10	17608	0	0	0	0	0	0	0	0	0	0	0	0	0	0	0	0	0	0	0	0	0	0	0	0	0	0	0	0	0	0	0	0	93	0	0	0	0	0	0	0	0
ASV693	TTTAGCCTCTAATATATTTCATAATGGTCCATCTGTAGATTTAGCTATCTTTTCTCTTCACATTGCAGGAATATCTTCAATTTTAGGAGCTATTAATTTTATTTCTACTATTCTAAATATACATCATAAAAACTTTTCGATAGATAAAGTCCCTTTATTAGTTTGATCAATTTTAATTACAGCTATTCTCCTTCTCTTATCATTA	Arthropoda	Insecta	Hymenoptera	Formicidae	Iridomyrmex	Iridomyrmex sp. 11	919	0	0	0	0	0	0	0	0	0	0	0	0	0	0	0	0	0	0	0	0	0	0	0	0	0	0	0	0	0	0	0	0	0	0	0	0	0	0	0	0	0
ASV694	CCTAGCCTCAAACATATTCCACAATGGCCCATCTGTAGACTTAGCTATCTTTTCCCTTCATATCGCAGGAATATCTTCAATTTTAGGAGCAATTAATTTTATCTCTACTATTTTAAATATACATCATAAAAATTTTACTATAGATAAAATCCCTCTATTAGTTTGATCAATTCTAATCACAGCTATTCTACTATTATTATCTTTA	Arthropoda	Insecta	Hymenoptera	Formicidae	Iridomyrmex	Iridomyrmex sp. 12	86072	21	33	25	0	0	0	0	0	0	0	0	0	0	0	0	0	0	0	0	0	189	0	0	0	0	0	0	0	0	0	0	0	0	0	0	0	0	0	0	0	0
ASV695	CCTAGCTTCAAATATATTCCATAATGGTCCATCTGTAGACTTAGCTATTTTTTCTCTTCATATTGCCGGAATATCTTCAATTCTTGGGGCAATTAATTTTATTTCAACTATTTTAAATATACATCATAAAAATTTTACTATAGATAAAATTCCACTTCTAGTTTGATCAATTTTAATTACTGCTATTCTTCTATTATTATCCCTT	Arthropoda	Insecta	Hymenoptera	Formicidae	Iridomyrmex	Iridomyrmex sp. nr DQ249968.1	3767	0	0	0	0	0	0	20	26	0	0	0	0	0	0	0	0	0	0	0	0	0	0	0	0	0	0	0	0	0	0	0	0	0	0	0	0	0	0	0	0	0
ASV696	TAGCTTCAAACATATTTCATAATGGACCATCTGTAGATTTAGCTATTTTTTCTCTTCATATTGCAGGAATATCTTCAATTTTAGGAGCAATTAATTTTATTTCTACTATTTTAAATATACACCATAAAAATTTTACTATAGATAAAATTCCTCTATTAGTTTGATCAATCTTAATTACAGCTATCCTATTACTTTTATCTCTA	Arthropoda	Insecta	Hymenoptera	Formicidae	Iridomyrmex	Iridomyrmex suchieri	1377	0	0	0	0	0	0	0	0	0	0	0	0	0	0	0	0	0	0	0	0	0	0	0	0	0	0	0	0	0	0	0	0	0	0	0	0	0	0	0	0	0
ASV697	TTTAGCAGCAAACATATACCATAGCGGACCATCCGTTGATTTAGCCATCTTCTCTTTACACATTGCAGGAATATCTTCTATTTTAGGGGCAATCAATTTTATCTCAACAATTCTAAATATACACCATAAAAATTTTTCTATTGACAAAATCCCTCTTTTAGTTTGATCAATTCTAATTACAGCTGTATTATTGCTTTTATCTTTA	Arthropoda	Insecta	Hymenoptera	Formicidae	Linepithema	Linepithema humile	308	0	3	0	5	0	0	0	0	0	2	0	0	0	0	0	0	0	0	0	0	4	0	0	0	0	0	0	221	0	0	0	0	0	0	0	0	0	0	0	0	0
ASV698	TTTAGCTTCTAATATTTTTCATAATGGACCTTCAGTAGATCTAACAATTTTTTCTCTTCATATTGCTGGAATATCTTCAATCTTAGGAGCTATTAACTTTATTTCAACAATTTTAAATATACACCACAAAAATCTTTCAATTGATAAAATTCCATTACTTGTCTGATCAATTTTAATTACTGCTATCCTTTTACTCCTCTCTCTT	Arthropoda	Insecta	Hymenoptera	Formicidae	Melophorus	Melophorus biroi	388	0	0	0	0	0	0	0	0	0	0	0	0	0	0	0	0	0	0	0	0	0	0	0	0	0	0	0	0	0	0	0	0	0	0	0	0	0	0	0	0	0
ASV699	ATTAGCTTCAAATATCTTTCATAATGGACCTTCAGTAGACTTAACAATTTTTTCCCTTCATATTGCAGGTATATCCTCAATTTTAGGGGCTATTAATTTTATTTCAACAATTTTAAATATACACCATAAAAATATTTCTATTGATAAAATTCCTTTATTTGTTTGATCTATTTTAATTACTACAATTTTATTACTCCTTTCTCTT	Arthropoda	Insecta	Hymenoptera	Formicidae	Melophorus	Melophorus hirsutipes	6611	0	0	0	0	0	0	0	0	0	0	0	0	0	0	0	0	0	0	0	0	0	0	0	0	0	0	0	0	0	0	8	0	0	0	0	0	0	0	0	0	0
ASV700	TTTGGCTTCTAATATTTTTCATAATGGACCTTCAGTAGATTTAACAATTTTTTCTCTTCATATTGCAGGTATATCTTCAATCTTAGGAGCTATTAATTTTATTTCAACAATTTTAAATATACATCATAAAAATATTTCTATTGATAAAATCCCATTACTTGTTTGATCAATCTTAATCACAGCAATTCTATTACTTCTTTCTCTC	Arthropoda	Insecta	Hymenoptera	Formicidae	Melophorus	Melophorus pelorocephalus	1521	0	0	0	0	0	0	0	0	0	0	0	0	0	0	0	0	0	0	0	0	0	0	0	0	0	0	0	0	0	0	0	0	0	0	0	0	0	0	0	0	0
ASV702	TCTAGCTTCTAATATTTTTCATAATGGACCTTCTGTAGATCTAACTATTTTCTCCTTACACATTGCAGGAATATCCTCAATTTTAGGGGCTATCAATTTTATTTCAACAATCTTAAATATGCATCATAAAAATTTATCTATAGATAAAATTCCTCTATTAGTTTGATCAATTTTAATTACAGCTATTCTTTTACTTCTTTCTCTT	Arthropoda	Insecta	Hymenoptera	Formicidae	Melophorus	Melophorus sp. 01	111672	0	0	0	0	0	0	0	0	0	0	0	0	0	0	0	0	0	0	0	0	0	0	0	0	0	0	0	0	0	0	0	0	0	0	0	0	0	0	0	0	0
ASV703	ACTAGCTTCTAATATTTTTCATAATGGGCCTTCTGTAGATTTAACTATCTTTTCCTTGCATATTGCAGGTATATCCTCAATCCTAGGAGCTATCAATTTTATTTCAACAATTTTAAATATACATCATAAAAATTTATCTATAGATAAAATTCCTCTCCTAGTTTGATCAATTTTAATTACAGCTATTCTTTTACTTCTTTCTCTT	Arthropoda	Insecta	Hymenoptera	Formicidae	Melophorus	Melophorus sp. 02	605	0	0	0	0	0	0	0	0	0	0	0	0	0	0	0	0	0	0	0	0	0	0	0	0	0	0	0	0	0	0	0	0	0	0	0	0	0	0	0	0	0
ASV704	ATTAGCCTCTAATATTTTTCATAATGGACCTTCAGTTGATTTAACTATCTTTTCTTTACATATTGCAGGAATATCATCAATCTTAGGAGCTATCAATTTTATTTCAACAATTTTGAACATATACCATAAAAACCTATCTATAGACAAAATTCCTTTACTTGTTTGATCAATTTTAATCACAGCTATTCTTTTACTTCTTTCTCTT	Arthropoda	Insecta	Hymenoptera	Formicidae	Melophorus	Melophorus sp. 03	1413	0	0	0	0	0	0	0	0	0	0	0	0	0	0	0	0	0	0	0	0	0	0	0	0	0	0	0	0	0	0	0	0	0	0	0	0	0	0	0	0	0
ASV705	ATTATAGCTTCTAATATTTTTCACAATGGACCTTCAGTTGATTTAACTATCTTTTCTTTACATATTGCAAGAATATCATTAATTTTAGGAGCTATCAATTTTATTTCAACAATCTTAAATATACATCATAAAAATCTATCTATCGACAAAATTCCTTTACTTGTCTGATCAATTTTAATCACAGCTATTCTTTTACTTCTCTCTCTT	Arthropoda	Insecta	Hymenoptera	Formicidae	Melophorus	Melophorus sp. 04	1201	0	0	0	0	0	0	0	0	0	0	0	0	0	0	0	0	0	0	0	0	0	0	0	0	0	0	0	0	0	0	0	0	0	0	0	0	0	0	0	0	0
ASV706	ATTAGCTTCTAATATTTTTCATAATGGACCTTCTGTAGATTTAACTATCTTCTCTTTACATATTGCAGGAATATCATCAATCTTAGGAGCTATCAATTTTATCTCAACAATTTTAAATATACATCATAAAAATCTATCTATAGATAAAATCCCCCTCCTAGTATGATCAATTTTAATTACAGCTATTTTTTTACTTCTTTCTCTT	Arthropoda	Insecta	Hymenoptera	Formicidae	Melophorus	Melophorus sp. 05	660	0	0	0	0	0	0	0	0	0	0	0	0	0	0	0	0	0	0	0	0	0	0	0	0	0	0	0	0	0	0	0	0	0	0	0	0	0	0	0	0	0
ASV707	ATTAGCTTCTAATATTTTCCATAATGGACCTTCCGTAGATTTAACTATCTTTTCTTTACATATTGCTGGGATATCTATCTTAGGGGCTATCAATTTTATTTCAACAATTTTAAATATACATCATAAAAACCTATCTATAGATAAAATTCCTCTACTTGTATGATCAATTTTAATTACAGCTATACTTTTGCTTCTTTCTCTT	Arthropoda	Insecta	Hymenoptera	Formicidae	Melophorus	Melophorus sp. 06	391	0	0	0	0	0	0	0	0	0	0	0	0	0	0	0	0	0	0	0	0	0	0	0	0	0	0	0	0	0	0	0	0	0	0	0	0	0	0	0	0	0
ASV708	ATTAGCTTCTAATATTTTTCATAATGGACCTTCAGTAGATCTAACAATTTTCTCTCTCCATATCGCAGGTATATCATCAATTTTAGGAGCTATTAATTTTATTTCGACAATTTTAAATATACATCATAAAAATCTCTCTATTGATAAAATTCCTTTACTTGTTTGATCAATTTTAATTACTGCTGTTCTCTTACTCCTTTCACTT	Arthropoda	Insecta	Hymenoptera	Formicidae	Melophorus	Melophorus sp. 07	1280	0	0	0	0	0	0	0	0	0	0	0	0	0	0	0	0	0	0	0	0	0	0	0	0	0	0	0	0	0	16	828	0	0	0	0	0	0	0	0	0	0
ASV711	TTTAGCCTCTAATATTTTTCATAGTGGACCATCAGTAGACTTAACAATTTTTTCCCTCCATATTGCGGGAATATCCTCAATTTTAGGAGCTATTAATTTTATTTCAACAATTTTAAATATACATCATAAAAATATTTCTATTGATAAAATCCCATTACTTGTTTGATCAATTTTAATTACAGCTATTCTGTTACTTCTTTCTCTC	Arthropoda	Insecta	Hymenoptera	Formicidae	Melophorus	Melophorus sp. 10	1303	0	0	0	0	0	0	0	0	0	0	0	0	0	0	150	19	0	0	0	0	0	0	0	0	0	0	0	0	0	0	0	0	0	0	0	0	0	0	0	0	0
ASV713	TTTAGCTTCAAATATCTTTCATAATGGTCCTTCAGTAGACTTAACAATCTTTTCCCTTCATATTGCAGGAATATCCTCAATTTTAGGAGCTATTAATTTTATTTCAACAATTCTAAATATACATCATAAAAATATTTCTATTGATAAAATTCCTTTATTTGTTTGATCTATTTTAATTACAACAATCTTATTACTTCTTTCTCTT	Arthropoda	Insecta	Hymenoptera	Formicidae	Melophorus	Melophorus sp. nr hirsutipes	3967	0	0	0	0	0	0	0	0	0	0	0	0	0	0	0	0	0	0	0	0	0	0	0	0	0	0	0	0	0	0	0	0	0	0	3	0	0	0	0	0	0
ASV714	TTTAGCTTCAAATATTTTTCATAATGGACCTTCAGTAGACTTAACAATTTTTTCTCTTCATATTGCAGGTATATCCTCAATTTTAGGAGCTATTAACTTTATTTCAACAATCTTAAATATACATCATAAAAATATTTCTATTGATAAAATTCCTTTACTTGTTTGATCTATTTTAATTACAGCAATTTTATTACTTCTTTCCCTT	Arthropoda	Insecta	Hymenoptera	Formicidae	Melophorus	Melophorus wheeleri	303	0	0	0	0	0	0	0	0	0	0	0	0	0	0	0	0	0	0	0	0	0	0	0	0	0	0	0	0	0	0	0	0	0	0	0	0	0	0	0	0	0
ASV715	CTTAGCCTCTAATATTTTTCATAGGGGAGCTTCCATTGATTTATCAATTTTTTCTCTTCATATCGCTGGTATATCTTCTATTTTAGGTGCAATTAACTTTATTTCTACAATTATTAATATGCATCATAAAAATTATACCTTAGATAAAATTCCTCTTTTAGTTTGATCAATTATAATTACAGCAATTTTATTACTTTTATCACTC	Arthropoda	Insecta	Hymenoptera	Formicidae	Monomorium	Monomorium euryodon	701	0	0	0	0	0	0	0	0	0	0	0	0	0	0	0	0	0	0	0	0	0	0	0	0	0	0	0	0	0	0	0	0	0	0	0	0	0	0	0	0	0
ASV716	TCTAGCATCCAACATCTTCCACAGAGGAGCTTCAATTGATTTATCAATTTTTTCTCTTCATATTGCAGGAATATCCTCAATTTTAGGAGCTATCAATTTTATCTCAACAATTATAAATATACATCATAAAAAATTATCTCTAGATAAAATCCCTCTTCTAGTCTGATCAATTATAATTACTGCTATTCTTCTTCTCTTATCTCTT	Arthropoda	Insecta	Hymenoptera	Formicidae	Monomorium	Monomorium rothsteini	192	0	0	0	0	0	0	0	0	0	0	0	0	0	0	0	0	0	0	0	0	0	0	0	0	0	0	0	0	0	0	0	0	0	0	0	0	0	0	0	0	0
ASV717	TTTAGCATCCAATATCTTTCATAGAGGAGCTTCAATCGACTTATCAATTTTTTCTCTTCACATTGCAGGAATATCCTCAATTTTAGGAGCTATTAATTTTATCTCAACAATTATAAATATACACCATAAAAAACTATCTTTAGATAAAATTCCCCTTCTAGTATGATCAATTATAATCACTGCCATTCTTTTACTCCTATCTCTC	Arthropoda	Insecta	Hymenoptera	Formicidae	Monomorium	Monomorium sordidum	5485	0	0	0	0	0	0	0	0	0	0	0	0	0	0	0	0	0	0	0	0	0	0	0	0	0	0	0	0	0	0	0	0	0	0	0	0	16	0	0	0	0
ASV718	ATTAGCCTCTAATATCTTTCATAGAGGAGCCTCTATTGATTTATCAATTTTTTCTCTTCACATTGCTGGTATATCTTCTATTTTAGGAGCTATTAATTTTATTTCCACAATTATTAATATACATCATAAAAACTATACTTTAGATAAAATCCCTCTCCTAGTTTGATCTATTATAATTACTGCTATTTTATTACTTCTATCTCTT	Arthropoda	Insecta	Hymenoptera	Formicidae	Monomorium	Monomorium sp. 1	143	0	0	0	0	0	0	0	0	0	0	0	0	0	0	0	0	0	0	0	0	0	0	0	0	0	0	0	0	0	0	0	0	0	0	0	0	0	0	0	0	0
ASV719	CTTAGCTTCTAACATCTTTCATAGAGGTGCCTCCATCGATTTATCAATTTTTTCTCTTCATATTGCCGGAATATCATCTATTTTAGGAGCAATTAACTTTATTTCTACAATTATTAATATACATCATAAAAATTATACCTTAGATAAAATTCCTCTTTTAGTCTGATCAATTATAATTACAGCAATTTTATTACTTTTATCTCTC	Arthropoda	Insecta	Hymenoptera	Formicidae	Monomorium	Monomorium sp. 2	51	0	0	0	0	0	0	0	0	0	0	0	0	0	0	0	0	0	0	0	0	0	0	0	0	0	0	51	0	0	0	0	0	0	0	0	0	0	0	0	0	0
ASV720	TTTAGCCTCTAATATTTTTCATAGAGGAGCTTCCATTGATTTATCAATTTTTTCTCTTTACATTGCCGGTATATTCTCTATTTTAGGTGCAATTAACTTTATTTCTACAATTATTAATATACACCATAAAAATTATACTTTAGATAAAATTCCTCTTCTAGTTTGATCAATTATAATTACAGCAATTTTATTACTTTTATCTCTC	Arthropoda	Insecta	Hymenoptera	Formicidae	Monomorium	Monomorium sp. 3	29	0	0	0	0	0	0	0	0	0	0	0	0	0	0	0	0	0	0	0	0	0	0	0	0	0	0	0	0	0	0	0	0	0	0	0	0	0	0	0	0	0
ASV723	CTTAGCATCTAACATTTTCCACAGAGGAGCTTCAATTGACCTATCTATTTTCTCACTTCATATTGCAGGTATATCTTCAATTTTAGGAGCAATTAATTTTATCTCAACAATTATAAATATACATCACAAAAAACTCTCACTAGATAAAATTCCACTCTTAGTTTGATCAATCATAATTACTGCTATTTTACTACTTCTATCTCTC	Arthropoda	Insecta	Hymenoptera	Formicidae	Monomorium	Monomorium sp. 6	1979	0	0	0	0	0	0	0	0	0	0	0	0	0	0	0	0	0	0	0	0	0	0	0	0	0	0	0	0	0	0	0	0	0	0	0	0	0	0	0	0	0
ASV724	TTTAGCATCAAATATCTTTCATAGAGGAGCTTCAATTGATCTATCTATCTTTTCTCTTCATATTGCAGGTATATCTTCAATTCTAGGAGCAATTAACTTTATTTCAACTATTATAAATATACATCATAAAAAACTTTCACTAGATAAAATCCCTTTACTCGTTTGATCAATTATAATTACTGCTATTCTATTATTACTATCTCTT	Arthropoda	Insecta	Hymenoptera	Formicidae	Monomorium	Monomorium sp. nr fieldi	981	0	0	0	0	0	0	0	0	0	0	0	0	0	0	0	0	0	0	0	0	0	0	0	0	0	0	0	0	0	0	0	0	0	0	0	0	0	0	0	0	0
ASV725	CTTAGCATCTAATATCTTTCATAGAGGAGCTTCAATTGACCTATCTATTTTTTCCCTTCATATTGCAGGAATATCTTCAATTTTAGGAGCTATCAATTTTATTTCAACAATTATAAATATACACCACAAAAAACTATCTCTAGATAAAATCCCCCTTCTAGTATGATCAATCATAATTACAGCTATTCTATTACTTTTATCTTTA	Arthropoda	Insecta	Hymenoptera	Formicidae	Monomorium	Monomorium sp. nr sordidum	2648	0	0	0	0	0	0	0	0	0	0	0	0	0	0	0	0	0	0	0	0	0	0	0	0	0	0	0	0	0	0	0	0	0	0	0	0	0	0	0	0	0
ASV727	TTTATCCTCAAATATCTTTCATAATGGAGCTTCAGTTGACTTAGCTATTTTTTCTCTGCACATTGCAGGGATATCCTCTATCCTAGGGGCAATCAACTTTATTTCCACTATCATAAATATATTCAACAAAAATTTTTCAATAGAAAAAATCCCCTTACTAGTTTGATCTATCTTAATTACTGCTATTCTACTACTTCTATCATTA	Arthropoda	Insecta	Hymenoptera	Formicidae	Myrmecia	Myrmecia tepperi	85274	0	0	0	0	0	0	0	0	0	0	0	0	0	0	0	0	0	0	0	0	0	0	0	0	0	0	0	0	0	0	0	0	0	0	0	0	0	0	0	0	0
ASV728	ATTATCTTCAAATATTTTCCACAACGGACCTGCTGTAGATTTAGCAATTTTCTCCCTTCACATTGCAGGAATATCTTCTATTCTTGGGGCTATTAATTTTATTTCTACAATTTTAAACATATTTAATAAAAATTTTTCCATAGAAAAAATTCCACTTTTAGTATGATCAATCTTAATTACAGCAATTCTTTTACTCTTATCACTT	Arthropoda	Insecta	Hymenoptera	Formicidae	Myrmecia	Myrmecia varians	46738	0	0	0	0	0	0	0	0	0	0	0	0	0	0	0	0	0	0	0	0	0	0	0	0	0	0	0	0	12	3	0	0	0	41384	0	0	0	0	0	0	0
ASV730	TCTAGCATCTAATATTTTTCATAATGGACCATCAGTTGACTTGGCTATTTTTTCTTTACACATCGCTGGAATATCTTCAATTTTAGGAGCAATTAACTTTATTTCAACAATTTTAAATATACATCATAAAAATTTTTCAATTGATAAAATTCCTCTCCTTGTTTGATCCATTTTTATTACAGCAATTCTTCTCCTATTATCATTA	Arthropoda	Insecta	Hymenoptera	Formicidae	Nylanderia	Nylanderia sp. nr KP232270.1	18113	0	0	0	0	0	0	0	0	0	0	0	0	0	0	0	0	0	0	0	0	0	0	0	0	0	0	0	0	0	0	0	0	0	0	0	0	0	0	0	0	0
ASV731	ATTAGCATCAAACATTTTTCATAATGGACCATCAGTTGATTTAGCTATTTTTTCATTACATATTGCTGGAATATCCTCAATTTTAGGAGCAATTAATTTTATCTCAACTATCTTAAATATACATCATAAAAATTTTTCAATTGATAAAATCCCCCTTCTCGTTTGGTCTATTTTTATCACTGCAATTCTTCTTCTTTTATCATTA	Arthropoda	Insecta	Hymenoptera	Formicidae	Nylanderia	Nylanderia sp. nr obscura	46	0	0	0	0	0	0	0	0	0	0	0	0	0	46	0	0	0	0	0	0	0	0	0	0	0	0	0	0	0	0	0	0	0	0	0	0	0	0	0	0	0
ASV732	ATTAGCATCTAATATTTTTCATAATGGACCATCAGTTGATTTAGCTATTTTTTCTTTACACATTGCTGGAATATCATCAATTTTAGGAGCAATTAACTTTATTTCAACAATTTTAAATATACATCATAAAAATTTTTCAATTGATAAAATTCCACTTCTAGTTTGATCTATTTTTATTACAGCAATTCTTCTTCTTTTATCATTG	Arthropoda	Insecta	Hymenoptera	Formicidae	Nylanderia	Nylanderia tasmaniensis	43270	0	0	0	0	0	0	0	0	0	0	0	0	0	0	0	0	0	0	0	0	0	0	0	0	0	0	0	0	0	0	0	0	0	0	0	0	0	0	0	0	0
ASV733	CTTAGCAAGAAATATATTTCACAATGGACCATCTGTAGATTTAGCTATTTTTTCTTTACATATTGCTGGAATATCATCAATTTTAGGAGCAATTAATTTTATTTCAACTATTCTAAACATACATCATAAAAATTTCTCTATAGATAAAATTCCTCTATTAGTATGATCAATCTTAATTACTGCTGTACTATTACTCTTATCTTTA	Arthropoda	Insecta	Hymenoptera	Formicidae	Ochetellus	Ochetellus glaber	157427	0	0	0	0	0	0	0	0	0	0	0	0	4	0	0	0	0	0	0	0	0	0	0	0	0	0	383	9	125	20	828	0	0	0	0	0	0	0	0	0	0
ASV734	ATTATCATCAAATATTTTTCATAATGGTCCTTCAGTTGATTTGGCAATTTTTTCACTACATATTGCCGGAATATCCTCTATTTTGGGGGCTATCAATTTTATCTCTACAATTTTAAATATACATCATAAAAATATTTCTATTGACAAAATCACATTACTTGTTTGATCAATTTTAATCACTGCTATCCTTTTACTTTTATCCTTG	Arthropoda	Insecta	Hymenoptera	Formicidae	Paraparatrechina	Paraparatrechina sp. 1	338462	60	103	5368	13	979	0	0	0	3354	1	0	0	0	0	1	0	0	0	0	0	0	0	0	0	0	0	0	0	39	0	1	0	0	0	0	0	0	0	15611	18906	14851
ASV735	ATTATCATCAAATATTTTTCATAATGGCCCCTCAGTTGATTTAGCAATTTTTTCATTACATATTGCTGGAATATCCTCTATTTTAGGAGCTATCAATTTTATCTCCACAATTTTAAATATACATCACAAAAATATTTCTATTGATAAAATTACATTATTTGTTTGATCAATTTTAATTACTGCTATTCTTTTACTTTTATCTTTG	Arthropoda	Insecta	Hymenoptera	Formicidae	Paraparatrechina	Paraparatrechina sp. 2	3535	0	0	28	0	5	0	0	0	37	0	0	0	0	0	0	0	0	0	0	0	0	0	0	0	0	0	0	0	1	0	0	0	0	0	0	0	0	0	159	149	68
ASV736	TCTATCCTCTAATATTTTTCATAATGGGCCCTCAGTTGATTTAGCAATTTTCTCCCTTCATATCGCAGGTATGTCATCTATTTTAGGAGCTATTAACTTCATTTCAACAATTTTAAACATACATCACAAAAATATTTCAATAGATAAAATTACTTTACTTGTTTGATCAATCTTAATTACTGCTATTTTATTACTTTTATCATTA	Arthropoda	Insecta	Hymenoptera	Formicidae	Paraparatrechina	Paraparatrechina sp. 3	3508	0	0	0	0	0	0	0	0	0	0	0	0	0	0	0	0	0	0	0	0	0	0	0	0	0	0	0	0	5	0	0	0	0	0	0	0	0	0	0	0	0
ASV737	CCTATCCTCTAACATTTTTCACAATGGCCCATCAGTAGATCTGGCGATTTTTTCTCTTCATATTGCTGGAATATCTTCCATCATAGGAGCAATTAATTTTATTTCTACAATTTTAAATATACATCATAAAAATATCTCTATTGATAAAATTAGATTACTTGTTTGATCAATTTTAATTACTGCTATCTTGTTACTTTTATCCTTA	Arthropoda	Insecta	Hymenoptera	Formicidae	Paraparatrechina	Paraparatrechina sp. 4	11519	0	0	0	0	0	0	0	0	0	0	0	0	0	0	0	0	0	0	0	0	0	0	0	0	0	0	0	0	0	0	0	0	0	0	0	0	0	0	0	0	0
ASV739	TCTAGCTTCAAATATTTTTCATAGAGGAGCCTCTATTGACTTATCTATTTTTTCTTTACATATTGCAGGAATATCCTCTATTTTAGGAGCAATTAATTTTATTTCTACAATTCTTAACATACATCATAAAAATTTTACTATAGATAAAATTCCCTTACTAGTATGATCTATTATAATTACTGCTGTATTACTTCTTCTTTCTCTA	Arthropoda	Insecta	Hymenoptera	Formicidae	Pheidole	Pheidole proxima	59439	0	0	0	0	0	0	0	0	0	0	0	0	0	0	0	0	0	0	0	0	0	0	0	0	0	0	0	0	0	0	0	0	0	0	0	0	0	0	0	0	0
ASV740	CTTGGCCTCAAATATTTTTCACAGAGGAGCCTCTATTGATTTATCTATTTTTTCTTTACATATTGCAGGAATATCATCTATTTTAGGAGCTATTAATTTTATTTCTACAATTATTAATATACATCATAAAAATTTTACCATAGATAAAATTCCACTATTAGTATGATTTATCATAATCACTGCTGTAGTATTACTTCTTTCTCTC	Arthropoda	Insecta	Hymenoptera	Formicidae	Pheidole	Pheidole sp. 1	34	0	0	0	0	0	0	0	0	0	0	0	0	0	0	0	0	0	0	0	0	0	0	0	0	0	0	0	0	0	0	0	0	0	0	0	0	0	0	0	0	0
ASV741	TTTAGCCTCAAATATTTTTCATAGAGGAGCTTCTATTGATTTATCTATTTTTTCTCTACATATTGCAGGAATATCATCTATTTTAGGAGCAATTAATTTTATTTCTACAATTATTAATATACATCATAAAAATTTTACTATAGATAAAATTCCTCTCTTAGTCTGATCAATTTTAATTACTGCCGTTCTATTACTCCTTTCTCTT	Arthropoda	Insecta	Hymenoptera	Formicidae	Pheidole	Pheidole sp. 2	344	0	0	0	0	0	0	0	0	0	0	0	0	0	0	0	0	0	0	0	0	0	0	0	0	0	0	0	0	0	0	0	0	0	0	0	0	0	0	0	0	0
ASV742	CTTAGCTTCAAATATTTTTCACAGAGGAGCTTCTATTGACCTATCTATTTTTTCTTTACATATTGCAGGAATATCATCTATTCTAGGGGCAATTAACTTTATCTCTACAATTATTAACATACATCATAAAAATTTTACTATAGACAAAATTCCTCTCTTAGTCTGATCCATTATAATTACTGCCGTTCTACTACTCCTTTCTCTC	Arthropoda	Insecta	Hymenoptera	Formicidae	Pheidole	Pheidole sp. 3	11396	0	0	0	0	0	0	0	0	0	0	0	0	0	0	0	0	0	0	0	0	0	0	4	0	0	0	0	0	0	0	0	0	0	0	0	0	0	0	0	0	0
ASV743	ATTAGCTTCAAATATTTTTCACAGAGGAGCTTCTATTGACTTATCTATTTTTTCTTTGCATATTGCAGGAATATCATCTATTCTGGGAGCAATTAATTTTATCTCTACAATTATTAACATACATCATAAAAATTTTACTATAGATAAAATCCCTCTCTTAGTATGATCCATTATAATTACTGCCGTACTATTACTCCTTTCTCTC	Arthropoda	Insecta	Hymenoptera	Formicidae	Pheidole	Pheidole sp. 4	59003	0	0	0	0	0	0	0	0	0	0	0	0	0	0	0	0	0	0	0	0	0	0	0	0	0	0	0	0	0	0	0	0	0	0	0	0	0	0	0	0	0
ASV745	TCTAGCGTCAAATATTTTTCATAGAGGAGCTTCTATTGACTTATCTATTTTTTCTTTACATATCGCAGGCATATCATCTATTTTAGGAGCAATTAATTTTATTTCTACTATTATTAATATACATCATAAAAATTTTACTATAGATAAAATCCCTCTCCTAGTCTGATCCATTATAATCACTGCCGTATTATTACTTCTCTCTCTC	Arthropoda	Insecta	Hymenoptera	Formicidae	Pheidole	Pheidole sp. KJ141916.1	18851	0	0	0	0	0	0	0	0	0	0	0	0	0	0	0	0	0	0	0	0	0	0	0	0	0	0	0	0	0	0	0	0	0	0	0	0	0	0	0	0	0
ASV746	CTTAGCCTCAAATATCTTCCACAGAGGGGCCTCTATTGATTTATCGATTTTTTCTTTACATATTGCAGGAATATCATCTATTTTAGGAGCAATTAATTTTATTTCTACAATTATTAATATACATCACAAAAATTTTACCATAGATAAAATTCCTTTATTAGTATGATCAATTATAATTACTGCTGTATTATTACTTCTCTCTCTT	Arthropoda	Insecta	Hymenoptera	Formicidae	Pheidole	Pheidole sp. nr KJ141888.1	51	0	0	0	0	0	0	0	0	0	0	0	0	0	0	0	0	0	0	0	0	0	0	0	0	0	0	0	0	0	0	0	0	0	0	0	0	0	0	0	0	0
ASV747	TTTAGCTTCAAATATTTTTCACAGAGGAGCTTCTATTGATTTATCTATTTTCTCTCTACATATCGCAGGAATATCATCTATTTTAGGAGCAATTAATTTTATTTCTACAATTATCAACATACATCATAAAAATTTTACTATAGATAAGATTCCCTTATTAGTTTGATCTATTATAATTACTGCAGTATTACTACTTCTTTCTCTG	Arthropoda	Insecta	Hymenoptera	Formicidae	Pheidole	Pheidole sp. nr KJ141915.1	4806	0	0	0	0	0	0	0	3	0	0	0	0	0	0	0	0	0	0	0	0	0	0	0	0	0	0	0	0	0	0	0	0	0	0	0	0	0	0	0	0	0
ASV748	TTTAGCCTCAAATATTTTTCATAGAGGAGCTTCAATTGATTTATCTATTTTTTCTTTACATATTGCAGGTATATCCTCTATTTTAGGAGCTATTAATTTTATCTCTACAATTATTAATATACATCATAAAAATTTTACTATAGATAAAATTCCTTTATTAGTTTGATCTATTTTAATTACTGCAATTTTATTATTACTCTCTCTT	Arthropoda	Insecta	Hymenoptera	Formicidae	Pheidole	Pheidole vigilans	201293	0	0	0	0	0	0	0	0	0	0	0	0	0	0	0	0	0	0	0	0	0	5	0	0	0	0	0	0	0	0	0	0	0	0	0	0	0	0	0	0	0
ASV750	TCTAGCCTCTAACATTTTTCATAACGGACCTTCAGTTGATTTAACAATTTTTTCACTACATATTGCAGGTATATCTTCAATTTTAGGAGCTATTAATTTCATTTCTACAATTCTAAATATACATCATAAAAATTACTCTATAGACAAAATTCCATTACTTGTTTGATCAATTATAATTACAGCAATTCTCCTCCTTCTATCCCTA	Arthropoda	Insecta	Hymenoptera	Formicidae	Rhytidoponera	Rhytidoponera metallica	39360	0	0	0	0	0	0	0	0	0	0	0	0	0	0	0	0	0	0	0	0	0	0	0	0	0	0	0	0	0	0	0	0	0	0	0	0	0	0	0	0	0
ASV752	TTAGCTTCTAATATTTTTCATAGGGGCGCATCAATTGACCTTTCTATTTTTTCTCTTCATATTGCCGGTATATCATCAATTCTAGGAGCCATTAATTTTATTTCTACTATTATTAATATACATCATAAAAATTTCACTATAGATAAAATCCCCCTATTAGTCTGATCAATCATGATTACAGCAATTTTATTACTTTTATCCCTT	Arthropoda	Insecta	Hymenoptera	Formicidae	Solenopsis	Solenopsis sp.	83355	0	0	0	0	0	0	0	0	0	0	0	0	0	0	0	0	0	0	0	0	0	0	0	0	0	0	0	0	0	0	0	0	0	0	0	0	0	0	0	0	0
ASV753	TTTAGCATCAAATATTTTTCATAATGGACCTTCAATTGATCTAACAATCTTTTCCCTTCATATTGCTGGTATGTCTTCTATCCTAGGAGCAATCAATTTCATTTCCACAATTTTAAACATACATCATAAAAATTTTTCAATTGATAAAATTTCTCTTCTTTCTTGATCAATTTTAATTACCGCTATTCTTTTACTTCTTTCTTTA	Arthropoda	Insecta	Hymenoptera	Formicidae	Stigmacros	Stigmacros sp. nr clivispina	5474	0	0	0	0	0	0	0	0	0	0	0	0	0	0	0	0	0	0	0	0	0	0	0	0	0	0	0	0	0	0	0	0	0	0	0	0	0	0	0	0	0
ASV755	ATTATCTACAATAATATATCATCCATCTCATTCTGTAGATTTTACTATTTTTTCATTACATATTGCAGGAATATCATCAATTATAGGAGCTATTAATTTTATTGTATCAATTTTATTAATAAAAAATATTTCACTTAATTTTGATCAAATTCCATTATTTCCATGATCAGTAAAAATTACTGCCATTTTATTATTATTATCAATA	Arthropoda	Insecta	Hymenoptera	Halictidae	Homalictus	Homalictus sp. MT636898.1	722	0	0	0	0	0	0	0	0	0	0	0	0	0	0	0	0	4	0	0	0	0	0	0	0	0	0	0	0	2	0	0	0	0	0	0	0	0	0	0	0	0
ASV756	TCTATCCTCTCTTACTTATCATTCTTCAAATTCTGTTGATTTTACAATTTTTTCATTACATATTGCAGGAGTTTCATCAATTATAGGAGCTATTAATTTTATTGTTTCAATTTTATTAATAAAAAATATTTCACTTAACTTTGATCAAATTCCCTTATTTCCATGGTCAGTAAAAATTACTGCAATCCTATTACTATTATCTTTA	Arthropoda	Insecta	Hymenoptera	Halictidae	Lasioglossum	Lasioglossum cognatum	405	0	0	0	0	0	0	0	0	0	0	0	0	0	0	0	0	0	0	0	0	0	0	0	0	0	0	0	0	0	0	0	0	0	0	7	0	0	0	0	0	0
ASV757	ATTATCTTCTTCAATATACCATTCATCAAATTCAGTTGATTTTACTATTTTTTCTTTACATATTGCAGGAATCTCTTCAATTATAGGAGCTATTAATTTTATTGTTTCAATTATAATAATAAAAAATATTTCAATTAATTTTGATCAAATCCCTTTATTTCCATGATCAGTAAATATTACTGCTATTTTACTATTACTTTCATTA	Arthropoda	Insecta	Hymenoptera	Halictidae	Lasioglossum	Lasioglossum dampieri	10678	0	0	0	0	0	0	0	0	0	0	0	0	0	0	0	0	0	0	0	0	0	0	0	0	0	0	0	0	683	9	555	0	0	0	20	0	0	0	0	0	0
ASV758	CTTATCATCAATTATATATCATTCAAGAAACTCTGTAGACTTTACAATTTTTTCATTACATATTGCAGGTATTTCATCAATTATAGGAGCTATTAACTTTATTGTTTCAATTTTATTAATAAAAAATATTTCAATTAATTTTGATCAAATTCCACTATTTCCATGATCAGTTAAAATTACAGCTATTTTATTATTATTATCTCTT	Arthropoda	Insecta	Hymenoptera	Halictidae	Lasioglossum	Lasioglossum erythrurum	1255	0	0	0	0	0	0	0	0	0	0	0	0	0	0	0	0	0	0	0	0	0	0	0	0	0	0	0	0	262	4	352	22	359	0	31	0	0	0	0	0	0
ASV759	TTTATCATCAATTATATACCACTCAAGAAATTCTGTAGATTTTACAATTTTTTCATTACATATTGCAGGAATTTCTTCAATCATAGGAGCCATTAATTTTATTGTTTCAATTATATTAATAAAAAATATTTCAATTAATTTTGATCAAATTCCCTTATTTCCATGATCAGTAAAAATTACAGCTATTCTTCTTTTACTATCTTTA	Arthropoda	Insecta	Hymenoptera	Halictidae	Lasioglossum	Lasioglossum hemichalceum	182	0	0	0	0	0	0	0	0	0	0	0	0	0	0	0	0	0	0	0	0	0	0	0	0	0	0	0	0	0	0	0	0	0	0	7	0	0	0	0	0	0
ASV761	CTTATCTTCAATTTTATACCACTCATCAAATTCTGTAGACTTCACAATTTTTTCATTACATATTGCTGGAATTTCATCAATTATAGGAGCCATTAACTTTATTGTTTCAATTTTATTAATAAAAAATATTTCAATCAATTTTGACCAAATTCCATTATTTCCTTGATCAGTTAAAATTACTGCTATTCTTCTACTTCTATCCTTA	Arthropoda	Insecta	Hymenoptera	Halictidae	Lasioglossum	Lasioglossum lanarium	1807	0	0	0	0	0	0	0	0	0	0	0	0	0	0	0	0	0	0	0	0	0	0	0	1459	0	0	0	0	0	0	0	0	0	53	0	0	0	0	0	0	0
ASV762	ATTATCATCTATAATATATCATTCATCTAATTCTGTTGATTTTACAATTTTTTCCCTTCATATTGCTGGAATTTCTTCAATTATAGGAGCAATTAATTTTATTGTATCAATTATATTAATAAAAAATATTTCAATTAATTTTGATCAAATTCCTCTCTTTCCATGATCAGTTAAAATTACTGCTATTCTCTTATTATTATCATTA	Arthropoda	Insecta	Hymenoptera	Halictidae	Lasioglossum	Lasioglossum murrayi	562	0	0	0	0	0	0	0	0	0	0	0	0	0	0	0	0	0	0	42	122	0	0	0	0	0	0	0	0	2	0	0	0	179	0	0	0	0	0	0	0	0
ASV763	CCATTTCATCAATTATATATTATTCATCTAATTCTGTAGATTTTACAATTTTTTCTTTACATATTGCAGGTATTTCATCAATTATAGGAGCCATTAATTTTATTGTTTCAATTTTATTAATAAAAAATATTTCAATTAATTTTTATCCAATCCCACTATTTCCATGATCAGTTAAAATTACTGCTATCCTTTTATTATTATCCTTA	Arthropoda	Insecta	Hymenoptera	Halictidae	Lasioglossum	Lasioglossum sp. 1	127	0	0	0	0	0	0	0	0	0	0	0	0	0	0	0	0	0	0	0	0	0	0	0	113	0	0	0	0	0	0	0	0	0	3	0	0	0	0	0	0	0
ASV764	TTTATCATCAATTATATATCATTCATCAAATTCTGTAGATTTTACAATTTTTTCTTTACATATTGCAGGAATTTCATCAATTATAGGAGCAATTAATTTCATTGTATCAATTTTAATAATAAAAAATATTTCAATTAATTACGATCAAATCCCCCTATTTCCATGATCAGTAAAAATTACTGCAATCCTTTTATTATTATCTTTA	Arthropoda	Insecta	Hymenoptera	Halictidae	Lasioglossum	Lasioglossum sp. 2	160	0	0	0	0	0	0	0	0	0	0	0	0	0	0	0	0	0	0	0	0	0	0	0	0	0	0	0	0	0	0	0	0	0	0	0	0	0	0	0	0	0
ASV765	TCTCTCATCAATTATATATCATTCATCAAATTCAGTTGATTTCACAATTTTTTCCCTTCATATTGCAGGAATTTCATCTATTATAGGAGCTATTAATTTCATTGTATCAATTTTATTAATAAAAAATATTTCTATTAATTTTGATCAAATTCCATTATTTCCATGATCTGTAAAAATTACAGCTATTTTATTACTACTTTCATTA	Arthropoda	Insecta	Hymenoptera	Halictidae	Lasioglossum	Lasioglossum sp. 3	135	0	0	0	0	0	0	0	0	0	0	0	0	0	0	0	0	0	0	0	0	0	0	0	0	0	0	0	0	0	0	0	0	0	0	0	6	0	0	0	0	0
ASV766	ATTATCATCATCAATATATCATTCATCAAATTCAGTTGATTTTACTATTTTTTCATTACATATTGCAGGAATCTCTTCAATTATAGGAGCTATTAATTTTATTGTTTCAATTATAATAATAAAAAATATTTCAATTAATTTCGATCAAATTCCTTTATTTCCATGATCAGTAAATATTACTGCTATCCTATTATTACTTTCATTA	Arthropoda	Insecta	Hymenoptera	Halictidae	Lasioglossum	Lasioglossum urbanum	515	0	0	0	0	0	0	0	0	0	0	0	0	0	0	0	0	0	0	0	0	0	0	0	0	0	0	0	0	9	0	17	0	0	0	0	0	0	0	0	0	0
ASV768	ATTATCTTCAATTAGATTCCATAATAATTCTTCAGTAGATTTAGCAATTTTCTCTCTTCATATTGCAGGAATATCATCAATTATAGGAGCAATTAATTTTATTGTAACAATTATAAATTTAAAAAATAATAATTTATCAATAGATCAAATTCCTTTATTTGCATGATCTGTTTTAATTACAGCTATTTTACTTTTATTATCTTTA	Arthropoda	Insecta	Hymenoptera	Hymenoptera sp.	Hymenoptera sp.	Hymenoptera sp. 1	1480	0	0	0	0	0	0	0	0	0	0	0	0	0	0	0	0	0	0	0	0	0	0	0	0	0	0	0	0	0	8	543	0	497	0	0	0	0	0	0	0	0
ASV769	CCTATCTAATATAAATTTTCATAATGGAATATCAGTAGATTTTACTATTTTTTCTTTACATATTGCTGGAATATCTTCAATTATAGGAGCAATTAATTTTATTGTTACTATTATTAATATAAAAAATAAAAATTTATCTATAGATCAAATTCCTTTATTTGCATGATCAGTATTAATTACTGCAATTTTATTATTATTATCATTA	Arthropoda	Insecta	Hymenoptera	Hymenoptera sp.	Hymenoptera sp.	Hymenoptera sp. 2	670	0	0	0	0	0	0	0	0	0	0	0	0	0	0	0	0	0	0	0	0	0	0	0	0	0	0	0	0	0	0	0	0	0	0	0	0	0	0	0	0	0
ASV770	TTTATCAAGAAATTTAAGACATAGAGGAATATCAATTGATTTTGCTATTTTCTCTTTACATATTGCCGGAGCTTCATCAATTATAGGAGCAATTAACTTCATAACTACAATTTTAAATATAAAAAATAAATTTATTAACCTTAACAAAATTTCATTATTTTCATGATCAATTATTATTACTGCATTCCTATTAATTGTTTCTTTA	Arthropoda	Insecta	Hymenoptera	Hymenoptera sp.	Hymenoptera sp.	Hymenoptera sp. 3	35	0	0	0	0	0	0	0	0	0	0	0	0	0	0	0	0	0	0	0	0	0	0	0	35	0	0	0	0	0	0	0	0	0	0	0	0	0	0	0	0	0
ASV772	ATTATCTTCTATTAAATACCATCCTGGAATTTCTACTGATTTAGTAATTTTTTCTTTACATTTAAGAGGGATTTCTTCAATTTTAGGATCAATTAATTTTATTACAACAATTTTAAATATACGCCCAAATATAATATTAATAGACAAAATTTCTTTATTTTCTTGATCAATTTTTTTAACTACAATTTTATTACTTTTATCTTTA	Arthropoda	Insecta	Hymenoptera	Hymenoptera sp.	Hymenoptera sp.	Hymenoptera sp. 5	514	0	0	0	0	0	0	0	0	0	0	0	0	0	0	0	0	0	0	0	0	0	0	0	0	0	0	0	0	0	0	0	0	514	0	0	0	0	0	0	0	0
ASV773	TTTATCATTAATTATAGGTCATGGAGGAATTTCAGTGGATTTAAGAATTTTTTCTTTACATTTAGCTGGTGCATCTTCAATTATAGGTTCAATTAATTTTATTGTTACAATTTTAAATATATGAATTGGATTAATTAATATAGATAAAATTACTTTATTTTCTTGATCAGTAATAATTACTGTAATTTTGTTATTATTATCTTTA	Arthropoda	Insecta	Hymenoptera	Hymenoptera sp.	Hymenoptera sp.	Hymenoptera sp. 6	421	0	0	0	0	0	0	0	0	0	0	0	0	0	0	0	0	0	0	0	0	0	0	0	0	0	0	0	0	0	0	0	0	0	0	421	0	0	0	0	0	0
ASV774	ATTATCATTAAATGTTAATCATGAAGGAATATCTGTTGATACAGCAATTTTCTCACTTCATCTCGCCGGTATATCTTCAATTATAGGAGCAATTAATTTTATTACAACAATTTTTAATATAAAAAATTATAATAAAAATTTTGAACAACTAACTTTATTCACTTGATCAATTAATATTACAACAATTTTACTTTTATTAGCTGTA	Arthropoda	Insecta	Hymenoptera	Ichneumonidae	Diadegma	Diadegma rapi	2949	0	0	0	0	0	0	0	0	0	0	0	0	0	0	0	0	0	0	0	0	0	0	0	0	0	0	0	0	0	0	0	0	0	0	0	0	0	0	0	0	0
ASV775	TTTATCTTCTAATTTAAATCATGAAGGAATATCTGTTGATTTAGCTATTTTTTCATTACATTTAGCAGGTATATCATCTATTATAGGAGCAATTAATTTTATTTCAACAATTATAAATATACGCCCTAATAATGTAACATTAGAAAAAATATCATTATTTTCATGATCAATTAAAATTACTACAATTTTATTATTATTAGCAGTT	Arthropoda	Insecta	Hymenoptera	Ichneumonidae	Diplazon	Diplazon laetatorius	7834	0	0	0	0	0	0	0	0	0	0	0	0	0	0	0	0	0	0	0	0	0	0	0	0	0	0	0	0	0	0	0	0	0	0	0	0	0	0	0	0	0
ASV776	TTTATCTTTAAATATTAATCACGAAGGAATATCAGTTGATTTAGCAATTTTTTCTTTACATTTAGCTGGAATATCATCAATTATAGGAGCAATTAATTTTATTACAACAATTTTAAATATACGAAGATTAAATATTACAATAGAAAAAATATCTCTATTTGTTTGATCAATTTTAATTACAACTATTTTATTATTATTAGCAGTA	Arthropoda	Insecta	Hymenoptera	Ichneumonidae	Ichneumonidae sp.	Tersilochinae sp. nr KR803794.1	77	0	0	0	0	0	0	0	0	0	0	0	0	0	0	0	0	0	0	0	0	0	0	0	0	0	0	0	0	0	0	0	0	0	0	0	0	0	0	0	0	0
ASV780	ATTATCTTCAAATTTATTCCATAACGGAATATCTGTAGATCTAAGAATTTTATCTTTACATTTAGCCGGAGCTTCTTCTTTAATAGGAACTATTAATTTTATTACAACCATTTTTAATATAAAAAACATTAACCTATCAATAGATAAGATTTCATTATTTACATGATCAATTCTAATTACTACTTTTTTACTTCTATTATCCCTT	Arthropoda	Insecta	Hymenoptera	Sphecidae	Podalonia	Podalonia sp.	157916	0	0	0	0	0	0	0	0	0	0	0	0	0	0	0	0	0	7664	0	0	0	0	0	0	0	0	0	0	8525	11	0	0	0	0	0	0	0	0	0	0	0
ASV781	ATTATCATCAATTATAGGACATAATTCACCTTCAGTTGATTTAAGAATCTTCTCACTTCATATTGCAGGAATTTCTTCAATTATAGGAGCTATTAATTTTATTGTAACAATTAAAAATATACATATCAAAACTTCATCTATAAATTTTTTACCCTTATTTGCCTGATCAATTCTAATTACAGCAATTTTATTACTTTTATCTTTA	Arthropoda	Insecta	Hymenoptera	Vespidae	Ropalidia	Ropalidia romandi	200	0	0	0	0	0	0	0	0	0	0	0	0	0	0	0	0	0	0	0	0	0	0	0	0	0	0	0	0	0	0	0	0	0	0	0	0	0	0	0	0	0
ASV782	TTTATCAACTTTCTTTCATTCTTCTATTTCTGTTGATTTAACTATTTTTTCTCTTCATTTAGCTGGTATTTCTTCTATTTTAGGAGCTGTAAATTTTATTACTACTGTTTTTCATTTACGAAATAAATCAATTAAGTTAGAAATAATTTCTTTATTTTCTTGATCTGTTATTATTACTGCTATTTTACTTTTATTATCTTTA	Arthropoda	Insecta	Insecta sp.	Insecta sp.	Insecta sp.	Insecta sp.	673	0	0	0	0	0	0	0	0	0	0	0	0	0	0	0	0	0	0	0	0	0	0	0	0	0	0	0	0	8	2	76	0	0	0	392	0	0	0	0	0	0
ASV783	TCTTTCTTCTAATATTGCTCATGGTGGAAGTTCAGTAGATTTAGCTATCTTTTCCCTTCATTTAGCAGGAATTTCATCAATTTTAGGAGCTATTAATTTTATTACGACCATTATTAATATACGACTTTATAATTTATCATTTGATCAAATACCTTTATTTGTTTGAGCAGTAGGAATTACAGCCTTATTACTTCTTCTCTCTTTA	Arthropoda	Insecta	Lepidoptera	Autostichidae	Anaptilora	Anaptilora sp. nr KF393075.1	474	0	0	0	0	0	0	0	0	0	0	0	0	0	175	0	0	0	0	0	0	6	0	0	0	0	0	27	0	23	0	0	0	0	0	176	0	0	0	0	0	0
ASV784	TCTTTCTTCTAATATTGCTCATGGTGGAAGATCAGTTGATTTAGCTATTTTTTCATTACACTTAGCTGGAATTTCATCAATTTTAGGAGCTATTAATTTTATTACAACAATTATTAATATACGATTAACAAATTTATCTTTTGATCAATTACCTTTATTTGTTTGAGCTGTTGGAATTACAGCTTTACTTTTATTATTATCTTTA	Arthropoda	Insecta	Lepidoptera	Batrachedridae	Batrachedra	Batrachedra sp. HQ948800.1	6130	0	0	0	0	0	0	0	0	0	0	0	0	0	0	0	0	0	0	0	0	0	0	0	0	0	0	0	0	0	0	0	0	0	0	0	0	0	0	0	0	0
ASV785	ATTATCTTCAAATATTGCCCATAGTGGAAGATCAGTTGATTTAGCCATTTTTTCTTTACATTTAGCGGGAATTTCCTCTATTTTAGGGGCCATTAACTTTATCACCACAATTATTAATATAAAAAATATTAACATATCTTTTGATCAAATACCTTTATTTGTGTGAGCTGTAGGAATTACAGCTTTATTACTTCTCCTATCATTA	Arthropoda	Insecta	Lepidoptera	Bedelliidae	Bedellia	Bedellia sp. GU695564.1	15317	0	0	0	0	0	0	0	0	0	0	0	0	0	0	0	0	0	0	0	0	0	0	0	0	0	0	0	0	0	0	0	0	0	0	0	0	0	0	0	0	0
ASV786	ACTTTCATCTAATATTGCCCATGGAGGTAGTTCCGTTGATTTAGCTATTTTTTCCCTACATTTAGCTGGTATCTCATCAATTTTAGGAGCTATTAATTTTATTACAACAATTATTAATATACGCCCTAATAATATATTTTTTGATCAAATACCTTTATTTGTTTGAGCTGTAGGAATTACTGCTTTACTCCTCCTTTTATCTCTT	Arthropoda	Insecta	Lepidoptera	Blastobasidae	Blastobasidae sp.	Blastobasidae sp.	623005	4711	7523	268	10968	0	0	0	0	0	0	0	23135	3	0	0	0	0	0	0	0	0	0	0	0	0	0	0	0	0	0	0	0	0	0	0	0	0	0	14689	17380	0
ASV790	ACTTTCATCTAATATTGCTCATGGAGGTAGCTCTGTTGATCTAGCTATTTTTTCTTTACATTTAGCTGGAATTTCTTCAATTCTTGGGGCTATTAATTTTATTACAACAATTATTAATATACGTCCTAACAATATATTTTTTGATCAAATACCTTTATTTGTTTGAGCTGTTGGTATTACAGCTTTACTTCTTCTTTTATCTCTT	Arthropoda	Insecta	Lepidoptera	Blastobasidae	Blastobasis	Blastobasis tarda	16890	0	0	0	0	0	0	0	0	0	0	0	0	0	0	0	0	0	0	0	0	0	0	0	0	0	0	0	0	0	0	0	0	0	0	0	0	0	0	0	0	0
ASV791	ACTTTCATCTAATATTGCTCATGGAGGTAGTTCTGTTGATTTAGCTATTTTTTCTTTACATTTAGCTGGAATTTCATCAATTTTAGGAGCTATTAATTTTATTACAACAATTATTAATATACGACCTAATAATATATTTTTTGATCAAATACCTTTATTTGTTTGAGCTGTAGGTATTACTGCTTTACTTCTTCTTTTATCTCTT	Arthropoda	Insecta	Lepidoptera	Blastobasidae	Neoblastobasis	Neoblastobasis sp. nr eurotella	32	0	0	0	0	0	0	0	0	0	0	0	0	0	0	0	0	0	0	0	0	0	0	0	0	0	0	0	0	0	0	0	0	0	0	0	0	0	0	0	0	0
ASV792	ACTTTCTTCTAATATTGCACATGGTGGTAGTTCAGTTGATTTAGCAATTTTTTCCCTACATCTTGCTGGTATTTCTTCCATTTTAGGAGCAATTAATTTTATTACTACTATTATTAATATAAAACCAAATAATATAACTTTAGATCAAATACCTCTCTTTGTATGATCAGTACAAATTACAGCAATTTTACTTTTACTTTCTTTA	Arthropoda	Insecta	Lepidoptera	Choreutidae	Tebenna	Tebenna micalis	13008	0	0	0	0	0	0	0	0	0	0	0	0	0	0	0	0	0	0	0	0	0	0	0	0	0	0	0	0	0	0	0	0	0	0	0	0	0	0	0	0	0
ASV793	TCTATCATCTAATATTGCTCATGGTGGTAGTTCAGTAGATCTCGCTATTTTTTCTTTACACTTAGCAGGAATTTCTTCAATTTTAGGAGCAATTAATTTTATTACTACAATTATTAATATACGAGTTAATAACTTATCTTTTGATCAAATACCTTTATTTGTTTGAGCAGTAGGAATCACAGCATTACTTCTTCTTTTATCTTTA	Arthropoda	Insecta	Lepidoptera	Cosmopterigidae	Anatrachyntis	Anatrachyntis badia	63364	0	0	0	0	0	0	0	0	0	0	0	0	0	0	0	0	0	0	0	0	0	0	0	0	0	0	0	0	0	0	0	0	0	0	0	0	0	0	0	0	0
ASV796	CTTATCTTCCAATATTGCGCATGGAGGAAGCTCTGTTGATTTAGCAATTTTTTCCCTTCATCTCGCTGGAATTTCATCAATTCTTGGGGCAATTAACTTCATTACTACAATTATTAATATACGACTCAATAATATATCTTTTGATCAAATACCACTCTTTGTTTGAGCAGTAGGAATTACTGCTTTACTATTACTTCTTTCCTTA	Arthropoda	Insecta	Lepidoptera	Cosmopterigidae	Eumenodora	Eumenodora encrypta	357	0	0	0	0	0	0	0	0	0	0	0	0	0	0	0	0	0	0	0	0	0	0	0	0	0	0	0	0	0	0	0	0	0	0	0	0	0	0	0	0	0
ASV797	ACTTTCATCTAATATTGCTCATGGAGGAAGATCAGTAGATTTAGCAATTTTTTCACTACATTTAGCGGGAATTTCTTCTATTCTTGGTGCTATTAATTTTATTACAACTATTATTAATATACGAATCAATAATTTATCATTTGACCAAATACCCTTATTTGTATGAGCTGTAGGAATTACAGCTTTATTATTATTACTTTCTTTA	Arthropoda	Insecta	Lepidoptera	Cosmopterigidae	Labdia	Labdia sp. KF393707.1	4303	0	0	0	0	0	0	0	0	0	0	0	0	0	0	0	0	0	0	0	0	0	0	0	0	0	0	0	0	0	0	0	0	0	0	0	0	0	0	0	0	0
ASV799	TTTATCTTCTAATATTGCTCATGGTGGAAGTTCTGTTGATCTTGCAATTTTTTCTCTTCATTTAGCAGGAATCTCATCTATTTTAGGAGCAATTAATTTTATTACTACAATTATTAATATACGCCCTAATGGTATATCTTTTGACCAAATACCATTATTTGTTTGAGCTGTAGGAATTACAGCTCTTCTTCTTTTACTTTCATTA	Arthropoda	Insecta	Lepidoptera	Cossidae	Endoxyla	Endoxyla cinereus	4805	0	0	0	0	0	0	0	0	0	0	0	0	0	0	0	0	0	0	0	0	0	0	0	0	0	0	10	0	4	2	6	0	0	0	6	0	0	0	0	0	0
ASV800	ACTTTCATCTAATATCGCTCATGGAGGAAGATCAGTCGATTTAGCAATTTTTTCCCTTCATTTAGCTGGAATTTCATCAATTTTAGGAGCAATTAATTTTATTACTACAATTATTAATATACGAATTAATGGTATATCATTTGATCAAATACCCTTATTTGTTTGAGCAGTAGGAATTACAGCTTTACTTTTATTACTTTCTTTA	Arthropoda	Insecta	Lepidoptera	Crambidae	Achyra	Achyra affinitalis	5542	0	0	0	0	0	0	0	0	0	0	0	0	0	0	0	0	6	0	0	0	0	0	0	0	0	0	0	0	0	0	0	0	0	0	0	0	0	0	0	0	0
ASV801	CCTTTCATCTAATATTGCTCATGGAGGAAGATCAGTTGATCTAGCAATTTTTTCTCTTCACTTAGCTGGAATTTCATCTATCTTAGGAGCCATTAATTTTATTACTACTATTATTAACATACGAATTAATGGTATATCATTTGATCAAATACCTTTATTTGTTTGAGCAGTTGGAATTACAGCTTTATTATTATTATTATCTCTA	Arthropoda	Insecta	Lepidoptera	Crambidae	Achyra	Achyra takowensis	207458	0	0	0	0	0	0	0	0	0	0	0	0	0	0	0	0	0	0	0	0	0	0	0	0	0	0	0	0	0	0	0	0	0	0	0	0	0	0	0	0	0
ASV803	TCTCTCATCAAATATTGCTCATGGTGGAAGTTCTGTAGATTTAGCTATTTTTTCACTACATTTAGCAGGAATTTCCTCAATTTTAGGTGCTATTAATTTTATTACTACAATTATTAATATACGAATTAATGGATTATCATTTGATCAAATACCTTTATTTGTATGATCAGTTGGAATTACCGCCTTACTTCTTTTATTGTCCTTA	Arthropoda	Insecta	Lepidoptera	Crambidae	Culladia	Culladia cuneiferellus	7448	0	0	0	0	0	0	0	0	0	0	0	0	0	0	0	0	0	0	0	0	0	0	0	0	0	0	0	0	10	0	0	0	0	0	0	0	0	0	0	0	0
ASV804	ACTTTCATCAAATATTGCCCATGGTGGAAGATCAGTTGATCTAGCAATTTTTTCTTTACATTTAGCAGGAATTTCTTCCATTTTAGGAGCAATTAATTTTATTACCACTATTATTAATATAAAAATTAATGGTCTTTCTTTTGATCAAATACCTTTATTTGTATGAGCTGTGGGAATTACAGCCTTATTATTATTATTATCACTA	Arthropoda	Insecta	Lepidoptera	Crambidae	Hellula	Hellula hydralis	1180415	0	0	0	0	0	0	0	0	0	0	0	0	0	0	0	0	0	0	0	0	0	0	0	0	0	0	0	0	0	0	0	0	0	0	0	0	0	0	0	0	0
ASV808	ACTTTCATCCAATATTGCTCATAGAGGAAGATCTGTAGACTTAGCTATTTTTTCTCTCCATTTAGCAGGTATTTCTTCAATTTTAGGAGCAATTAATTTTATTACAACAATTATTAATATACGTCTTAATAATTTAATATTTGATCAAATACCATTATTTGTATGAGCTGTTGGTATTACAGCATTATTATTGTTATTATCTTTA	Arthropoda	Insecta	Lepidoptera	Elachistidae	Elachista	Elachista synethes	22795	0	0	0	0	0	0	0	0	0	0	0	0	0	0	0	0	0	0	0	0	0	0	0	0	0	0	0	0	0	0	0	0	0	0	0	0	0	0	0	0	0
ASV809	TCTTTCTTCTAATATTGCTCATGGTGGAAGTTCAGTAGATTTAGCTATCTTTTCCCTTCATTTAGCAGGAATTTCATCAATTTTAGGAGCTATTAATTTTATTACAACCATTATTAATATACGACTTTATAATTTATCATTTGATCAAATACCTTTATTTGTTTGAGCAGTAGGAATTACAGCCTTATTACTTCTTCTCTCTTTA	Arthropoda	Insecta	Lepidoptera	Gelechiidae	Anaptilora	Anaptilora ephelotis/homoclera	2813	2	9	0	4	0	8	3	9	7	6	8	8	29	73	22	6	4	0	2	0	0	67	22	0	0	0	29	0	0	0	136	0	353	68	21	10	0	0	2	0	0
ASV810	ACTATCATCTAATATCGCTCATGGAGGCAGTTCAGTAGACTTAGCTATTTTCTCATTACATTTAGCAGGTATCTCTTCAATTCTTGGAGCAATTAATTTTATTACAACTATTATTAATATACGAATTAATGGAATAATATTTGACCAAATACCTTTATTTGTATGAGCTGTAGGAATTACAGCTTTATTATTATTATTATCATTG	Arthropoda	Insecta	Lepidoptera	Gelechiidae	Aproaerema	Aproaerema isoscelixantha	2039	0	0	0	0	0	0	0	0	0	0	0	0	0	0	0	0	0	0	0	0	0	0	0	0	0	0	0	0	0	0	0	0	0	0	0	0	0	0	0	0	0
ASV813	ACTTTCATCTAATATTGCCCATGGAGGAAGATCAGTAGACTTAGCTATTTTTTCTCTTCATTTAGCAGGTATTTCTTCTATTTTAGGAGCTATTAATTTTATTACTACAATTATTAATATACGAGTTAATAATTTATCATTTGATCAAATACCTTTATTTGTTTGAGCCGTAGGAATTACAGCTTTACTTTTACTTTTATCTCTT	Arthropoda	Insecta	Lepidoptera	Gelechiidae	Ardozyga	Ardozyga sp. nr JN270841.1	105	0	0	0	0	0	0	0	0	0	0	0	0	0	0	0	0	0	0	0	0	0	0	0	0	0	0	0	0	0	0	0	0	0	0	0	0	0	0	0	0	0
ASV815	TTTATCTTCTAATATTGCCCATGGGGGTAGCTCAGTAGATTTAGCTATTTTTTCATTACATTTAGCTGGTATTTCTTCAATTTTAGGAGCTATTAATTTTATTACTACAATTATTAATATACGAATTAATAACTTATCTTTTGATCAAATACCTTTATTTGTTTGAGCTGTAGGAATCACAGCCTTACTTCTTTTACTTTCTCTC	Arthropoda	Insecta	Lepidoptera	Gelechiidae	Ephysteris	Ephysteris promptella	275726	0	0	0	0	0	0	0	0	0	0	0	0	0	0	0	0	0	0	0	0	0	0	0	0	0	0	0	0	0	0	0	0	0	0	0	0	0	0	5428	5019	0
ASV816	TTTATCATCTAATATCGCCCACGGAGGAAGATCAGTGGATTTAGCAATTTTTTCCCTACATTTAGCGGGTATTTCATCAATTTTAGGAGCTATTAATTTTATTACTACTATTATTAACATACGAATTAATGGATTATCATTTGATCAAATACCTCTTTTTGTTTGGGCGGTTGGAATTACAGCTCTTCTTCTTTTATTATCTTTA	Arthropoda	Insecta	Lepidoptera	Gelechiidae	Ephysteris	Ephysteris subdiminutella	4183924	0	0	0	0	0	0	0	0	0	0	0	0	0	0	0	0	0	0	0	0	0	0	1	0	0	0	0	0	0	0	0	0	0	0	0	0	0	0	0	0	0
ASV817	CCTTTCTTCTAATATTGCTCACGGAGGAAGTTCAGTTGATTTAGCTATTTTCTCTTTACATTTAGCAGGTATTTCTTCAATTTTAGGGGCAATTAATTTTATTACTACTATTATTAATATACGAATTAATAGACTTTCTTTTGATCAAATACCATTATTTGTTTGAGCTGTAGGAATTACAGCTTTACTTCTTTTACTTTCTTTA	Arthropoda	Insecta	Lepidoptera	Gelechiidae	Megacraspedus	Megacraspedus sagittifera	10776	0	0	0	0	0	0	0	0	0	0	0	0	0	0	0	0	0	0	0	0	0	0	0	0	0	0	0	0	0	0	0	0	0	0	0	0	3988	0	0	0	0
ASV818	TCTTTCATCTAATATTGCTCATGGAGGAAGATCAGTTGATTTAGCTATTTTTTCTCTTCATCTAGCTGGAATTTCTTCTATTTTAGGAGCTATTAATTTTATTACTACTATTATTAATATACGAATTAATGGACTTTCTTTTGATCAAATACCATTATTTGTTTGAGCTGTTGGTATTACAGCATTATTACTTTTATTATCTCTT	Arthropoda	Insecta	Lepidoptera	Gelechiidae	Scrobipalpa	Scrobipalpa pyrrhanthes	12302	0	0	0	0	0	0	0	0	0	0	0	0	0	0	0	0	0	0	0	0	0	0	0	0	0	0	0	0	0	0	0	0	0	0	0	0	0	0	0	0	0
ASV820	TCTTTCATCTAACATTGCTCACGGAGGAAGATCAGTTGATTTAGCTATTTTTTCTCTTCATCTAGCTGGAATTTCTTCTATTTTAGGAGCTATTAATTTTATTACTACTATTATTAATATACGAATTAATGGACTTTCTTTTGATCAAATGCCATTATTTGTTTGAGCTGTGGGTATTACAGCATTATTACTTTTATTATCTCTT	Arthropoda	Insecta	Lepidoptera	Gelechiidae	Scrobipalpa	Scrobipalpa sp. nr KF391801.1	2574	0	0	0	0	0	0	0	0	0	0	0	0	0	0	0	0	0	0	0	0	0	0	0	0	0	0	0	0	0	0	0	0	0	0	0	0	0	0	0	0	0
ASV821	CCTTTCATCTAATATTGCCCATAGAGGAAGATCAGTAGATTTAACAATTTTTTCCCTACATTTAGCTGGTATTTCCTCAATTTTAGGAGCAATTAATTTTATTACAACTATTATTAACATACGAATTAATGGAATATCTTTTGATCGACTCCCCCTTTTTGTTTGAGCTGTAGGAATTACAGCCCTTCTTCTTCTACTATCTTTA	Arthropoda	Insecta	Lepidoptera	Gelenchiidae	Gelenchiidae sp.	Gelenchiidae sp.	2285	0	0	0	0	0	0	0	0	0	0	0	0	0	0	0	0	0	0	0	0	0	0	0	0	0	0	0	0	0	0	0	0	0	0	0	0	0	0	0	0	0
ASV823	TCTTTCATCTAATATTGCTCATGGAGGAAGCTCTGTAGATTTAGCTATTTTTTCTTTACATTTAGCAGGAATTTCTTCAATTTTAGGGGCAATTAATTTTATTACAACTATTTTTAATATACGATTAAATAATATATTTTTTGATCAATTACCTTTATTTGTATGAGCGGTAGGAATTACAGCTTTCCTTTTATTACTTTCTCTG	Arthropoda	Insecta	Lepidoptera	Geometridae	Chloroclystis	Chloroclystis insigillata	147	0	0	0	0	0	0	0	0	0	0	0	0	0	0	0	0	0	0	0	0	0	0	0	0	0	0	0	0	0	0	0	0	0	0	0	0	0	0	0	0	0
ASV824	ATTATCTTCTAATATTGCTCATGGAGGAAGATCTGTTGACTTAGCTATTTTTTCATTACATTTAGCTGGAATTTCTTCAATTTTAGGGGCAATTAATTTTATTACTACAATTATCAATATACGATTAAATAATTTATCATTCGATCAAATACCTTTATTTGTTTGAGCAGTAGGAATTACAGCATTTTTATTATTACTATCATTA	Arthropoda	Insecta	Lepidoptera	Geometridae	Hypobapta	Hypobapta diffundens	150	0	0	0	0	0	0	0	0	0	0	0	0	0	0	0	0	0	0	0	0	0	0	0	0	0	0	0	0	0	0	0	0	0	0	0	0	0	0	0	0	0
ASV826	TTTATCTTCTAATATTGCTCACGGAGGAAGTTCTGTAGATTTAGCTATTTTTTCTTTACATTTAGCTGGTATTTCTTCAATTTTAGGGGCAATTAATTTCATTACAACTATTATTAATATACGATTAAATAATATATTTTTTGATCAATTACCTTTATTTGTTTGAGCAGTAGGAATTACAGCATTTTTATTATTACTTTCTCTT	Arthropoda	Insecta	Lepidoptera	Geometridae	Phrissogonus	Phrissogonus laticostata	40	0	0	0	0	0	0	0	0	1	0	0	0	0	9	0	0	0	0	0	0	0	0	0	0	0	0	0	0	0	0	3	0	0	0	0	0	0	0	0	0	0
ASV827	TTTATCTTCAAATATTGCTCACGGTGGAAGTTCAGTAGATTTAGCAATTTTTTCTTTACACTTAGCTGGAATTTCTTCTATTTTAGGTGCTATTAATTTTATTACTACTATTATTAATATACGATTAAATAACATATCTTTTGATCAATTACCTTTATTTGTTTGAGCAGTAGGAATTACAGCTTTCCTTTTATTACTTTCATTA	Arthropoda	Insecta	Lepidoptera	Geometridae	Scopula	Scopula optivata	8222	0	0	0	0	0	0	0	0	0	0	0	0	0	0	0	0	0	0	0	0	0	0	0	0	0	0	0	0	0	0	0	0	0	0	0	0	0	0	0	0	0
ASV828	TTTATCATCTAATATTGCACATGGAGGAAGATCTGTAGATCTAGCAATTTTCTCATTACATTTAGCGGGAATTTCATCAATTTTAGGGGCTATTAATTTTATTACTACCATTATTAATATACGATTAAATAATATATCATTTGATCAATTACCTTTATTTGTATGAGCCGTAGGAATTACAGCATTTTTATTACTTCTATCATTA	Arthropoda	Insecta	Lepidoptera	Geometridae	Scopula	Scopula rubraria	32550	0	0	0	0	0	0	0	0	0	0	0	0	0	0	0	0	0	0	0	0	0	0	0	0	0	0	0	0	0	0	0	0	0	0	0	0	0	0	0	0	0
ASV829	TTTATCTTCTAATATTGCTCATGGGGGTAGATCTGTAGATTTAGCAATTTTCTCCCTTCATTTAGCTGGAATTTCCTCAATTTTAGGGGCTATTAATTTTATTACAACAATTATTAATATACGATTAAATAACCTGTCATTTGATCAAATACCTTTATTTGTGTGAGCTGTAGGAATTACAGCATTTTTATTATTATTATCTTTA	Arthropoda	Insecta	Lepidoptera	Geometridae	Zermizinga	Zermizinga sinuata	581	0	0	0	0	0	0	0	0	0	0	0	0	0	0	0	0	0	0	0	0	0	0	0	0	0	0	0	0	0	0	0	0	0	0	0	0	0	0	0	0	0
ASV830	ACTTTCATCTAATATTGCTCATGGTGGAAGATCAGTAGATTTAGCAATTTTTTCACTTCATTTAGCAGGTATCTCATCAATTTTAGGTGCAATTAACTTTATTACAACAATTATTAATATACGAGCTAATGGAATAACATTTGATAGTATATCATTATTTATCTGAGCTGTAGGAATTACTGCTTTATTACTTTTACTTTCATTA	Arthropoda	Insecta	Lepidoptera	Gracillariidae	Dialectica	Dialectica scalariella	12282	0	0	0	0	0	0	0	0	0	0	0	0	0	0	0	0	0	0	0	0	0	0	0	0	0	0	0	0	0	0	0	0	0	0	0	0	0	0	0	0	0
ASV831	ATTATCATCTAATATTGCCCACGGTGGTAGATCAGTTGATTTAGCTATTTTTTCTTTACACTTAGCTGGTATTAGTTCAATTTTAGGTGCTATTAATTTTATTACAACAATTATTAATATACGAATTAATAAAATAACTTTAGATTCAATATCTTTATTTGTTTGATCAGTTGGAATTACAGCCTTATTATTACTTTTATCTTTA	Arthropoda	Insecta	Lepidoptera	Gracillariidae	Phyllocnistis	Phyllocnistis citrella	36310	0	0	0	0	0	0	0	0	0	0	0	0	0	0	0	0	0	0	0	0	0	0	0	0	0	0	0	0	0	0	0	0	0	0	0	0	0	0	0	0	0
ASV832	TTTATCACAGGTAATGTCCCATCCAAGTGCAGGAGTTGACATTGCTATACTTGCACTTCATGTTGCTGGTATGTCGTCAATTGTTGGGGCGATCAACTTTATAGTTACTATATTTAACATGCGCACAAAAGGAATGTCATTAACTAAGATGCCACTGTTTGTTTGGTCTGTCTTGCTAACAGCATTTATGTTGATTGTTGCCTTA	Arthropoda	Insecta	Lepidoptera	Hesperiidae	Bolla	Bolla atahuallpai	1071	0	0	0	0	0	0	0	0	0	0	0	0	0	0	0	0	0	0	0	0	0	0	0	26	0	0	0	0	4	21	750	0	0	0	1	0	4	0	0	0	0
ASV833	TCTTTCTTCTAATATTGCCCATCAAGGATCCTCTGTTGATTTAGCAATTTTTTCTTTACATTTAGCTGGAATTTCCTCAATTTTAGGAGCTATTAATTTTATTACTACAATTATTAATATACGAATTAATAATTTATCATTTGATCAAATACCATTATTTGTTTGATCTGTAGGAATTACAGCTTTATTATTATTAATTTCTCTA	Arthropoda	Insecta	Lepidoptera	Hesperiidae	Ocybadistes	Ocybadistes walkeri	3266	0	0	0	0	0	0	0	0	0	0	0	0	0	0	0	0	0	0	0	0	0	0	0	0	0	0	0	0	0	0	0	0	0	0	0	894	0	0	0	0	0
ASV834	TCTTTCTTCTAATATTGCCCATCAAGGATCCTCTGTTGACTTAGCAATTTTTTCTTTACATTTAGCTGGAATTTCCTCAATTTTAGGAGCTATTAATTTTATTACTACAATTATTAATATACGAATTAATAATTTATCATTTGATCAAATACCATTATTTGTTTGATCTGTAGGAATTACAGCTTTATTATTATTAATTTCTCTA	Arthropoda	Insecta	Lepidoptera	Hesperiidae	Taractrocera	Taractrocera dolon	90791	0	0	0	0	0	0	0	0	0	0	0	0	0	0	0	0	0	0	0	0	0	0	0	0	0	0	0	0	0	0	0	0	0	0	0	73423	0	0	0	0	0
ASV836	TCTTTCATCTAATATTGCCCATAGTGGTAGTTCTGTTGATTTAGCAATTTTTTCTTTACATTTAGCAGGAATCTCTTCAATTTTAGGAGCAATTAATTTTATTACAACAATTATTAATATACGTCTTAATAATATAAATTTTGACCAAATACCCCTTTTTGTTTGAGCTGTTGGTATTACTGCTCTTCTTTTATTATTATCTTTA	Arthropoda	Insecta	Lepidoptera	Lecithoceridae	Lecithocera	Lecithocera terrigena	47	0	0	0	0	0	0	0	0	0	0	0	0	0	0	0	0	0	0	0	0	0	0	0	0	0	0	0	0	0	0	0	0	0	0	0	0	0	0	0	0	0
ASV837	ACTTTCTGCTAATATTGCTCATGGAGGAAGATCTGTAGATTTAGCCATTTTTTCCCTTCATTTAGCCGGAATTTCATCAATTCTAGGGGCAATTAATTTTATTACCACTATTATTAATATACGAACAAATAAAATATCTTTTGATCAAATACCTTTATTTGTTTGAGCTGTAGGAATTACAGCTTTATTATTACTTCTCTCTCTA	Arthropoda	Insecta	Lepidoptera	Lepidoptera sp.	Lepidoptera sp.	Lepidoptera sp. 1	85748	0	0	0	0	0	0	0	0	0	0	0	0	0	0	0	0	0	0	0	0	0	0	0	0	0	0	0	0	0	0	0	0	0	0	0	0	0	0	0	0	0
ASV838	ACTTTCATCTAATATTGCTCATGGTGGAAGATCTGTAGACTTAGCAATTTTTTCCCTTCATTTAGCTGGAATTTCCTCAATTTTAGGAGCAATTAATTTTATTACCACAATTATTAATATACGAGTTAATAATTTATCCTTTGATCAAATACCTTTATTTGTATGAGCTGTAGGAATTACAGCTTTATTACTTCTTCTTTCTCTA	Arthropoda	Insecta	Lepidoptera	Lepidoptera sp.	Lepidoptera sp.	Lepidoptera sp. 2	1287	0	0	0	0	0	0	0	0	0	0	0	0	0	0	0	0	0	0	0	0	0	0	0	0	0	0	0	0	0	0	0	0	0	0	0	0	0	0	0	0	0
ASV839	TCTTTCATCTAATATTGCTCATAGAGGATCTTCCGTTGATTTAGCTATTTTTTCTTTACATTTAGCTGGAATTTCCTCAATTTTAGGAGCAATTAACTTTATTACAACAATTATTAATATACGAGTTAATAATTTAACTTTTGATCAAATACCTTTATTTATTTGATCTGTTGGAATTACAGCTATTTTACTACTTCTTTCTTTA	Arthropoda	Insecta	Lepidoptera	Lepidoptera sp.	Lepidoptera sp.	Lepidoptera sp. 3	7781	0	0	0	0	0	0	0	0	0	0	0	0	0	0	0	0	0	0	0	0	0	0	0	0	0	0	0	0	0	0	0	0	0	0	0	0	0	0	0	0	0
ASV840	ACTTTCATCTAATATTGCTCATGGAGGAAGTTCTGTTGATCTCGCTATTTTTTCTCTTCATTTAGCTGGAATTTCTTCAATTTTAGGAGCAATTAATTTTATTACAACAATTATTAATATACGAGTTAATAATTTATCTTTTGATCAAATACCTTTATTTGTATGAGCTGTTGGTATTACCGCTTTACTTCTCTTACTTTCTTTA	Arthropoda	Insecta	Lepidoptera	Lepidoptera sp.	Lepidoptera sp.	Lepidoptera sp. 4	1043	0	0	0	0	0	0	0	0	0	0	0	0	0	0	0	0	0	0	0	0	0	0	0	0	0	0	0	0	0	0	0	0	0	0	0	0	0	0	0	0	0
ASV841	ACTCTCATCTAATATTGCCCATGGAGGAAGTTCTGTTGATTTAGCTATTTTTTCTCTGCATTTAGCTGGAATTTCATCAATTTTAGGAGCAATTAATTTTATTACTACTATTATTAATATACGTATTAATGGTATATCATTTGATCAATTACCTCTATTTATTTGAGCTGTTGGTATTACTGCTTTACTACTTCTTCTTTCTCTA	Arthropoda	Insecta	Lepidoptera	Lepidoptera sp.	Lepidoptera sp.	Lepidoptera sp. 5	8176	0	0	0	0	0	0	0	0	0	0	0	0	0	0	0	0	0	0	0	0	0	0	0	0	0	0	7679	61	0	0	0	0	0	0	0	0	0	0	0	0	0
ASV842	TTTATCTTCTAATATTGCTCATGGAGGAAGATCAGTTGATTTAGCTATTTTTTCTTTACATCTTGCTGGAATTTCTTCAATTTTAGGTGCTGTAAATTTTATTACAACAATTATTAATATACGAATTAATGGAATATCATTTGATAAAATATCCTTATTTATCTGAGCAGTGGGAATTACTGCTCTTCTTTTATTATTATCTCTC	Arthropoda	Insecta	Lepidoptera	Lepidoptera sp.	Lepidoptera sp.	Lepidoptera sp. 6	58491	0	0	0	0	0	0	0	0	10210	1	0	0	0	0	1	0	0	0	0	0	0	1	2	0	0	0	0	2	0	0	0	0	0	0	0	0	0	0	0	0	0
ASV843	ACTATCTTCTAATATTGCTCATGGAGGAAGATCTGTCGATTTAGCTATTTTTTCTTTACACTTAGCAGGTATTTCCTCAATTTTAGGAGCTATTAACTTTATTACTACAATCATTAATATACGAATTAATAGTCTATCATTTGATCAAATACCTCTATTTGTTTGAGCTGTTGGTATTACAGCTTTATTACTGTTATTATCTTTA	Arthropoda	Insecta	Lepidoptera	Lepidoptera sp.	Lepidoptera sp.	Lepidoptera sp. 7	33379	0	0	0	0	0	0	0	0	0	0	0	0	0	0	0	0	0	0	0	0	0	0	0	0	0	0	0	0	0	0	0	0	0	0	0	0	0	0	0	0	0
ASV844	ACTTTCATCTAATATTGCACATAGAGGAGCTTCAGTTGACTTAGCAATTTTCTCTTTACATTTAGCAGGAATTTCATCAATTTTAGGAGCTATTAATTTTATTACAACAATTATTAATATACGTGTAAATAATTTATCTTTTGATCAAATATCTTTATTTATTTGAGCAGTTGGAATTACAGCATTATTATTATTATTATCTTTA	Arthropoda	Insecta	Lepidoptera	Lycaenidae	Theclinesthes	Theclinesthes serpentata/sulpitius	51243	0	0	0	0	0	0	0	0	0	0	0	0	0	0	0	0	0	0	0	0	0	0	0	0	0	0	0	0	0	0	0	0	0	0	0	0	0	0	0	0	0
ASV845	ACTATCATCTAATATCGCTCATAGAGGATCATCAGTTGATTTAGCAATTTTTTCTTTACATTTAGCAGGTATTTCATCAATTTTAGGAGCTATTAATTTTATTACAACTATTATTAATATACGAGTAAATAATTTATCTTTTGATCAAATATCATTATTTATTTGAGCAGTTGGTATTACAGCTTTATTATTACTTTTATCTTTA	Arthropoda	Insecta	Lepidoptera	Lycaenidae	Zizina	Zizina otis	300862	0	0	0	0	0	0	0	0	0	0	0	0	0	0	0	0	0	0	0	0	0	0	0	0	139603	1669	0	0	0	0	0	0	0	1	0	0	0	0	0	0	0
ASV846	CTTATCAGCAAATATTGCTCATAGAGGTAGATCTGTTGATTTAGCTATTTTCTCACTACATTTAGCTGGAATTTCATCTATTTTAGGAGCCATTAATTTTATTACAACTGTGATTAATATACGTGCAAATGGAATATCATTTGATCAAATACCTTTATTTGTATGAGCGGTTGCTATTACAGCTTTATTACTGCTCTTATCCCTA	Arthropoda	Insecta	Lepidoptera	Nepticulidae	Stigmella	Stigmella sp. 1	2044	0	0	0	0	0	0	0	0	0	0	0	0	0	0	0	0	0	0	0	0	0	0	0	0	0	0	0	0	0	0	0	0	0	0	0	0	0	0	0	0	0
ASV847	CCTATCAGCTAATATTGCTCATAGTGGTAGATCTGTTGATTTAGCAATTTTTTCTTTACATTTAGCAGGAATTTCATCAATTTTAGGAGCTATTAATTTCATTACCACTGTAATTAATATACGAGCTAATGGAATATCTTTTGATCAAATACCTTTATTTGTATGAGCAGTAGCAATTACAGCTTTACTTTTATTATTATCTTTA	Arthropoda	Insecta	Lepidoptera	Nepticulidae	Stigmella	Stigmella sp. 2	307	0	0	0	0	0	0	0	0	0	0	0	0	0	0	0	0	0	0	0	0	0	0	0	0	0	0	0	0	0	0	0	0	0	0	0	0	0	0	0	0	0
ASV848	TCTTTCATCTAATATTGCTCATGGAGGTACATCAGTTGATTTAGCTATTTTTTCACTACATCTTGCAGGTATTTCATCTATTTTAGGAGCAATTAACTTTATTACTACTATTATTAATATACGATTAAATAGCTTATCTTTTGATCAAATACCCCTATTTGTATGAGCTGTTGGAATTACTGCATTTTTATTACTTCTTTCTTTA	Arthropoda	Insecta	Lepidoptera	Noctuidae	Acontia	Acontia nivipicta	176709	0	0	0	0	0	0	0	0	0	0	0	0	0	0	0	0	0	0	0	0	0	0	0	0	0	0	0	0	0	0	0	0	0	0	0	0	0	0	0	0	0
ASV849	ACTTTCATCTAATATCGCTCATGGAGGAAGATCAGTAGATCTTGCTATTTTTTCTCTTCATTTAGCTGGTATTTCATCTATTTTAGGAGCTATTAATTTTATTACTACAATTATTAATATACGATTAAATAGTTTATCTTTTGATCAAATACCTTTATTTATTTGAGCTGTAGGAATTACTGCATTTTTATTATTATTATCTTTA	Arthropoda	Insecta	Lepidoptera	Noctuidae	Agrotis	Agrotis munda	398256	0	0	0	0	0	0	0	0	0	0	0	0	0	0	0	0	0	0	0	0	0	0	0	0	0	0	0	0	0	0	0	0	0	0	0	0	2	194154	0	0	0
ASV853	ACTTTCATCAAATATTGCTCATGGAGGTAGATCTGTAGATTTAGCTATTTTTTCTTTACATTTAGCTGGAATTTCTTCTATTTTAGGTGCTATTAATTTTATTACTACAATTATCAATATACGATTAAATAATTTATCATTCGATCAAATACCTTTATTTATTTGAGCTGTTGGAATTACTGCATTTTTATTACTATTATCTTTA	Arthropoda	Insecta	Lepidoptera	Noctuidae	Mythimna	Mythimna convecta	149	0	0	0	0	0	0	0	0	0	0	0	0	0	0	0	0	0	0	0	0	0	0	0	0	0	0	0	0	0	0	0	0	0	0	0	0	0	0	0	0	0
ASV854	TTTAGCTTCAGGAATTGCTCATGCTGGAGCTTCTGTAGATTTAGCTATTTTTTCTCTTCATTTAGCTGGTATTTCTTCTATTTTAGGAGCTGTGAATTTTATTACAACAGTAATTAATATACGATCAACAGGAATTACATTAGACCGTATACCTTTATTTGTTTGATCTGTAGTAATTACAGCAATTTTATTATTACTTTCTTTA	Arthropoda	Insecta	Lepidoptera	Noctuidae	Xanthodes	Xanthodes albago	25298	0	0	0	0	0	0	0	0	0	0	0	0	0	0	0	0	0	0	0	0	0	0	0	0	0	0	0	0	0	0	0	0	0	0	0	0	0	0	0	0	0
ASV855	TTTATCATCTAATATTGCTCATGGAGGAGGTTCAGTAGATTTAGCAATTTTTTCTCTCCATCTTGCTGGAATTTCCTCAATTTTAGGAGCTATTAATTTTATTACAACAATTATTAATATACGATTAGGAAATATATCATTTGATCAAATACCTTTATTTGTTTGAGCTGTAGGTATTACAGCACTTCTTCTTCTTCTTTCTTTA	Arthropoda	Insecta	Lepidoptera	Oecophoridae	Cirromitra	Cirromitra sp. KF396910.1	1005	0	0	0	0	0	0	0	0	0	0	0	0	0	0	0	0	0	0	0	0	0	0	0	0	0	0	0	0	0	0	0	0	0	0	0	0	0	0	0	0	0
ASV857	TTTATCTTCTAATATTGCTCATGGAGGCAGATCTGTTGACTTAGCTATTTTTTCTTTGCATTTAGCTGGTATTTCTTCTATTTTAGGGGCAATTAATTTTATCACAACAATTATTAATATACGTTTAGGAAATATATCATTTGATCAAATACCTTTATTTGTTTGAGCTGTTGGAATTACAGCTCTTCTTTTACTTTTATCTTTA	Arthropoda	Insecta	Lepidoptera	Oecophoridae	Eulechria	Eulechria marmorata	114	1	0	0	0	0	0	0	0	0	0	0	0	4	0	0	0	0	0	0	0	0	0	16	0	0	0	0	0	12	0	0	0	0	0	42	0	0	0	0	0	0
ASV858	TTTATCCTCTAATATTGCCCACGGAGGTAGATCTGTTGACTTAGCTATTTTTTCTTTACATTTAGCTGGTATTTCTTCTATTTTAGGAGCAATTAACCTTATCACAACAATTATTAATATACGTTTAGGAAATATATCATTTGATCAAATACCTTTATTTGTTTGAGCTGTTGGAATTACAGCTCTTCTTTTACTTCTATCTTTA	Arthropoda	Insecta	Lepidoptera	Oecophoridae	Eulechria	Eulechria sp. nr marmorata	30	0	0	0	0	0	0	0	0	0	0	0	0	0	30	0	0	0	0	0	0	0	0	0	0	0	0	0	0	0	0	0	0	0	0	0	0	0	0	0	0	0
ASV859	CCTATCATCTAACATTGCTCATGGAGGTAGATCTGTTGATTTAGCTATTTTTTCCTTACATTTAGCGGGAATCTCATCAATTTTAGGGGCAATTAATTTTATTACAACAATTATTAATATACGATTAGGAAATATATCTTTTGATCAAATACCACTATTTGTTTGAGCTGTAGGAATTACAGCGCTTCTTCTTCTCCTCTCTCTA	Arthropoda	Insecta	Lepidoptera	Oecophoridae	Hoplostega	Hoplostega ochroma	3320	0	0	0	0	0	0	0	0	0	2642	0	0	0	0	0	0	0	0	0	0	0	0	0	0	0	0	0	0	0	0	0	0	0	0	0	0	0	0	0	0	0
ASV860	TCTTTCCTCTAATATTGCCCATAGAGGAAGATCAGTTGATTTAGCAATTTTTTCTCTTCATTTAGCCGGAATTTCTTCTATTTTAGGAGCTATTAATTTTATTACTACTATTATTAATATACGAGTTAATAACTTATCTTTCGATCAAATACCCCTATTTGTTTGAGCGGTAGGAATTACAGCTCTTCTTTTATTATTATCCTTA	Arthropoda	Insecta	Lepidoptera	Oecophoridae	Mixodetis	Mixodetis sp. KF396448.1	1555	0	0	0	0	0	0	0	0	0	0	0	0	0	0	0	0	0	0	0	0	0	0	0	0	0	0	0	0	0	0	0	0	0	0	0	0	0	0	0	0	0
ASV861	TCTTTCCTCTAATATTGCCCATAGAGGAAGATCAGTTGATCTAGCAATCTTTTCTCTTCATCTAGCTGGTATTTCTTCTATTCTAGGAGCTATTAATTTTATTACTACTATTATTAATATACGAGTTAATAATATATCATTTGATCAAATACCATTATTTGTTTGAGCAGTAGGTATTACAGCTCTTCTTTTATTATTATCTTTA	Arthropoda	Insecta	Lepidoptera	Oecophoridae	Mixodetis	Mixodetis sp. nr HQ948791.1	717	0	0	0	0	0	0	0	0	0	0	0	0	0	0	0	0	0	0	0	0	0	0	0	0	0	0	0	0	0	0	0	0	0	0	0	0	0	0	0	0	0
ASV862	CTTATCCTCTAACATTGCCCATGGAGGAAGATCTGTTGACTTAGCAATTTTCTCTCTTCATTTAGCTGGAATTTCATCAATTTTAGGAGCAATTAACTTTATTACAACAATCATTAATATACGTTTAAGAAACATATCCTTTGATCAAATACCTTTATTTGTTTGATCTGTAGGAATTACCGCTCTTCTTCTACTCCTTTCTCTT	Arthropoda	Insecta	Lepidoptera	Oecophoridae	Ochropolis	Ochropolis micrastis	9866	0	0	0	0	0	0	0	0	0	0	0	0	0	0	0	0	0	0	0	0	0	0	0	0	0	0	0	0	0	0	0	0	0	0	0	0	0	0	0	0	0
ASV863	TTTATCTTCTAATATTGCTCATGGAGGAAGCTCTGTTGACTTAGCAATTTTTTCCCTACATTTAGCTGGTATTTCATCAATTTTAGGAGCAATTAACTTTATTACCACAATTATTAATATACGTCTAGGTAATATATCTTTTGACCAAATACCCCTTTTTGTTTGAGCTGTTGGTATTACAGCTTTACTTCTTCTTTTATCTTTA	Arthropoda	Insecta	Lepidoptera	Oecophoridae	Oecophoridae sp.	Oecophoridae sp. 1	15456	0	0	0	0	0	0	0	0	0	0	0	0	0	0	0	0	0	0	0	0	0	0	0	0	0	0	0	0	0	0	0	0	0	0	0	0	0	0	0	0	0
ASV864	TTTATCCTCTAATATTGCTCATGGAGGAAGTTCCGTTGATTTAGCAATTTTTTCCTTACATCTAGCAGGTATTTCATCAATCTTAGGAGCAATTAATTTTATTACTACAATTATTAATATGCGATTAGGTAATATATCTTTTGATCAAATACCTTTATTTGTTTGAGCTGTTGGTATTACAGCTCTACTTCTCCTTTTATCATTA	Arthropoda	Insecta	Lepidoptera	Oecophoridae	Oecophoridae sp.	Oecophoridae sp. 2	1395	0	0	0	0	0	0	0	0	0	0	0	0	0	0	0	0	0	0	0	0	0	0	0	0	0	0	0	0	0	0	0	0	0	0	0	0	0	0	0	0	0
ASV865	CTTATCATCTAATATTGCTCATGGAGGAGGCTCAGTAGATTTAGCAATTTTTTCCCTTCATCTTGCAGGAATTTCATCAATCTTAGGAGCTATTAATTTTATTACAACAATTATTAATATACGATTAGGAAATATATCATTTGATCAAATACCTTTATTTGTTTGAGCTGTAGGAATTACAGCTTTACTTCTTCTTCTCTCTTTA	Arthropoda	Insecta	Lepidoptera	Oecophoridae	Oecophoridae sp.	Oecophoridae sp. 3	68712	0	0	0	0	0	0	0	0	0	0	0	0	0	0	0	0	0	0	0	0	0	0	0	0	0	0	0	0	0	0	0	0	0	0	0	0	0	0	0	0	0
ASV868	CCTATCATCTAATATTGCTCATGGAGGAAGTTCTGTTGATTTAGCAATTTTTTCTCTTCATTTAGCTGGTATTTCCTCAATTTTAGGAGCAATTAATTTTATTACTACAATTATTAACATACGATTAGGAAATATATCCTTTGATCAAATACCTTTATTCGTTTGAGCTGTTGGAATTACAGCTCTCCTTCTCCTTTTATCACTA	Arthropoda	Insecta	Lepidoptera	Oecophoridae	Philobota	Philobota sp.	4732	0	0	0	0	0	0	0	0	0	0	0	0	0	0	0	0	0	0	0	0	0	0	0	0	0	0	0	0	0	0	0	0	0	0	0	0	0	0	0	0	0
ASV869	TATCATCTAATATTGCCCATGGTGGTAGTTCTGTTGATTTAGCAATTTTCTCCCTTCACTTAGCTGGTATTTCTTCAATTTTAGGTGCAATTAATTTTATTACTACTATTATTAATATACGATTAGGAAATATATCATTTGACCAAATACCTTTATTTGTATGATCAGTTGGTATTACAGCTCTTCTTCTTTTATTATCTCTC	Arthropoda	Insecta	Lepidoptera	Oecophoridae	Prepocosma	Prepocosma sp. nr KF396188.1	62302	0	0	0	0	0	0	0	0	0	0	0	0	0	0	0	0	0	0	0	0	0	0	0	0	0	0	0	0	0	0	0	0	0	0	0	0	0	0	0	0	0
ASV870	ATTATCTTCTAATATTGCCCATGGAGGAAGATCAGTAGATTTAGCAATTTTTTCTCTTCATTTAGCGGGTATTTCCTCAATCTTAGGGGCAATTAATTTTATTACTACAATTATTAATATACGATTAAGAAACATATCTTTTGATCAAATACCCCTATTTGTTTGAGCTGTTGGAATCACAGCTCTTCTCCTTCTTCTTTCTCTC	Arthropoda	Insecta	Lepidoptera	Oecophoridae	Scatochresis	Scatochresis sp. KF404723.1	478	0	0	0	0	0	0	0	0	0	0	0	2	0	89	0	0	0	0	0	0	0	0	0	0	0	0	0	0	0	2	27	0	140	0	0	0	0	0	0	0	0
ASV871	TCTTTCATCTAATATTGCTCATGGAGGAGGATCAGTAGATTTAGCTATTTTTTCATTACATTTAGCAGGGATTTCTTCAATTTTAGGTGCAATTAATTTCATTACAACAGTAATTAATATAAAATCATCAGGAATATCATTTGATCGAATACCTTTATTTGTATGATCAGTTGCTATTACAGCATTATTATTAATATTATCTTTA	Arthropoda	Insecta	Lepidoptera	Opostegidae	Opostegidae sp.	Opostegidae sp.	10995	0	0	0	0	0	0	0	0	0	0	0	0	0	0	0	0	0	0	0	0	0	0	0	0	0	0	0	0	0	0	0	0	0	0	0	0	0	0	0	0	0
ASV872	CTTATCTGCCGTTGAAGCTCACTCAGGGTTTAGAGTAGATTTAGTTATTTTTTCTCTTCACTTAGCTGGAGTTAGGTCAATCTTGGGAGCGATCAACTTTATCACTACATCAATCAATCTGTGAGTTGAGCCTCGTCGGTTTGAGTTACTACCCCTTTTTAGATGGTCCGTTCTTATCACAGCGTTTCTTCTTCTTCTATCTTTA	Arthropoda	Insecta	Lepidoptera	Pieridae	Leodonta	Leodonta tellane	21307	0	0	0	0	0	0	0	0	0	0	0	0	0	0	0	0	0	0	0	0	0	0	0	0	0	0	0	0	0	0	0	0	0	0	0	0	0	0	0	0	0
ASV874	TTTATCTTCAAATATCGCTCATAGAGGAAGATCTGTCGATTTAGCTATTTTTTCTCTTCATTTAGCCGGTATTTCTTCAATTTTAGGGGCAATTAATTTTATTACAACTATTATTAATATAAAAAGAAATGGAATGTCATTTGATCGTATACCTTTATTTGTTTGAGCTGTAGGAATTACAGCTATTTTATTATTACTATCTCTA	Arthropoda	Insecta	Lepidoptera	Plutellidae	Plutella	Plutella xylostella	24381	0	0	0	0	0	0	0	0	0	0	0	0	0	0	0	0	0	0	0	0	0	0	0	0	0	0	0	0	0	0	0	0	0	0	0	0	0	0	0	0	0
ASV875	TTTATCATCAAATATTGCTCACAGTGGACCATCAGTTGACTTAGCTATTTTTTCTCTTCATTTAGCTGGAATTTCATCAATTTTAGGAGCAATTAATTTTATTTCAACAATTATTAATATACGATTAAATAAAATAACATTTGATCAAATACCATTATTTGTATGAGCAGTATGAATTACAGCAGTTCTTTTATTACTATCTCTT	Arthropoda	Insecta	Lepidoptera	Pterophoridae	Trichoptilus	Trichoptilus adelphodes	6625	0	0	0	0	0	0	0	0	0	0	0	0	0	0	0	0	0	0	0	0	0	0	0	0	0	0	0	0	0	0	0	0	0	0	0	0	0	0	0	0	0
ASV877	TTTATCTTCAAATATTGCACATAGTGGAAGATCAGTTGATTTAGCTATTTTTTCTTTACATTTAGCAGGAATTTCTTCCATTTTAGGGGCAATTAATTTTATTACTACTATTATTAATATAAAATTAAATGGTTTATCATTTGATCAAATACCTTTATTTGTTTGAGCAGTAGGTATTACTGCTCTTTTATTATTATTATCTTTA	Arthropoda	Insecta	Lepidoptera	Pyralidae	Araeopaschia	Araeopaschia demotis	177012	0	0	0	0	0	0	0	0	0	0	0	0	0	0	0	0	0	0	0	0	0	0	0	0	0	0	0	0	0	0	0	0	0	0	0	0	0	0	0	0	0
ASV878	TTTATCTTCAAATATTGCACATAGAGGTAGATCTGTTGATTTAGCTATTTTCTCTCTTCATTTAGCTGGAATTTCTTCAATTTTAGGAGCAATTAATTTTATCACTACTATTATTAATATAAAATTAAATGGATTATTATTTGACCAAATACCTTTATTTGTTTGAGCCGTTGGTATTACTGCTTTATTATTATTATTATCTTTA	Arthropoda	Insecta	Lepidoptera	Pyralidae	Araeopaschia	Araeopaschia sp. KF396500.1	19626	0	0	0	0	0	0	0	0	0	0	0	0	0	0	0	0	0	0	0	0	0	0	0	0	0	0	0	0	0	0	0	0	0	0	0	0	0	0	0	0	0
ASV879	TCTTTCTTCTAATATTGCTCATGGAGGAAGATCTGTTGATTTAGCTATTTTTTCTCTACATTTAGCTGGAATTTCTTCTATTTTAGGAGCAATTAATTTTATTACAACTATTATTAATATAAAATTAAATGGGATAATATTCGACCAAATACCTTTATTTGTTTGAGCCGTTGGTATTACTGCTTTACTTCTTCTTTTATCTTTA	Arthropoda	Insecta	Lepidoptera	Pyralidae	Cadra	Cadra figulilella	133129	0	0	0	0	0	0	0	0	0	0	0	0	0	0	0	0	0	0	0	0	0	0	0	0	0	0	0	0	0	0	0	0	0	0	0	0	0	0	0	0	0
ASV882	ATTATCTTCAAATATTGCTCATGGAGGTAGCTCAGTAGATTTAGCTATTTTCTCTTTACATTTAGCTGGAATTTCATCAATTTTAGGGGCTATTAATTTTATTACAACTATCATTAATATAAAATTAAATGGTTTATCATTTGATCAAATACCTTTATTTGTTTGAGCTGTAGGAATTACAGCTTTACTATTACTCCTTTCTTTA	Arthropoda	Insecta	Lepidoptera	Pyralidae	Epicrocis	Epicrocis metallopa	633	0	0	0	0	0	0	0	0	0	0	0	0	0	0	0	0	0	0	0	0	0	0	0	0	0	0	0	0	0	0	0	0	0	0	0	0	0	0	0	0	0
ASV883	ACTTTCATCTAATATTGCTCATAGAGGAAGATCAGTAGATCTTGCTATTTTTTCTCTTCATTTAGCTGGAATTTCATCAATTTTAGGAGCTATTAATTTTATCACAACTATTATTAATATAAAATTAAATGGAATATCATTTGATCAAATACCTTTATTCGTATGATCAGTAGGAATTACAGCTTTACTTTTACTATTATCTTTA	Arthropoda	Insecta	Lepidoptera	Pyralidae	Faveria	Faveria tritalis	588340	0	0	0	0	0	0	8	3	0	0	0	0	0	0	0	0	0	0	0	0	0	0	0	8	0	0	0	0	0	0	0	0	0	0	7	0	0	0	0	0	0
ASV885	TTTATCATCTAATATTGCTCATGGAGGAAGCTCAGTAGATCTTGCTATTTTTTCCTTACATTTAGCTGGAATTTCATCTATTTTAGGAGCTATTAATTTTATTACTACTATTATTAATATAAAATTAAATGGATTATCATTTGATCAAATACCTTTATTCGTTTGAGCTGTTGGAATTACAGCTTTATTATTATTACTCTCTTTA	Arthropoda	Insecta	Lepidoptera	Pyralidae	Morosaphycita	Morosaphycita oculiferella	394590	0	0	0	0	0	0	0	0	0	0	0	0	0	0	0	0	0	0	0	0	0	0	0	0	0	0	0	0	0	0	0	0	0	0	0	0	0	0	0	0	0
ASV886	ACTTTCCTCTAATATTGCTCATAGAGGAAGATCAGTTGATTTAGCCATTTTTTCTCTCCATTTAGCAGGAATTTCTTCAATTTTAGGAGCTATTAATTTTATTACTACAATTATTAATATACGAATTAATAATTTATCATTTGATCAAATACCCCTATTTGTTTGAGCTGTAGGAATTACAGCTTTATTATTATTATTATCTTTA	Arthropoda	Insecta	Lepidoptera	Scythrididae	Eretmocera	Eretmocera sp. KF406274.1	4086	0	0	0	0	0	0	0	0	0	0	0	0	0	0	0	0	0	0	0	0	0	0	0	0	0	0	0	0	0	0	0	0	0	0	0	0	0	0	0	0	0
ASV888	TCTTTCCTCTAATATTGCTCATAGAGGAAGATCAGTTGATTTAGCAATTTTTTCTCTTCATTTAGCTGGTATTTCCTCTATTTTAGGAGCTATTAACTTTATTACTACTATTATTAATATACGAGTTAATAATATATCATTTGATCAAATACCCCTATTTATTTGAGCAGTAGGAATTACAGCTCTTCTTTTATTATTATCTTTA	Arthropoda	Insecta	Lepidoptera	Scythrididae	Scythris	Scythris sp. KF403266.1	25212	0	0	0	0	0	0	10492	13700	0	0	0	0	0	0	0	0	0	0	0	0	0	0	0	0	0	0	0	0	0	0	0	0	0	0	0	0	0	0	0	0	0
ASV889	TCTTTCCTCTAATATTGCCCATAGAGGAAGATCAGTTGATTTAGCAATCTTCTCCCTTCATTTAGCTGGTATTTCTTCTATTTTAGGAGCTATTAATTTTATTACTACTATTATTAATATACGAGTTAATAATATATCATTTGATCAAATACCTTTATTTGTTTGAGCAGTAGGTATTACAGCTCTTCTCTTATTACTATCTTTA	Arthropoda	Insecta	Lepidoptera	Scythrididae	Scythris	Scythris sp. nr KF400763.1	1081	0	0	0	0	0	0	0	0	0	0	0	0	0	0	0	0	0	0	0	0	0	0	0	0	0	0	0	0	0	0	0	0	0	0	0	0	0	0	0	0	0
ASV890	TTTATCCTCAAATATTGCTCACGGAGGTGGTTCTGTAGATTTAGCTATTTTTTCTTTACATTTAGCTGGAATTTCTTCAATTTTAGGAGCTGCTAATTTTATTACTACAACAATTAATATACGACCTAATAATATATCATTTGATAAAATACCCCTATTCGTATGATCAGTAGCTATTACTGCATTATTATTATTATTATCTTTA	Arthropoda	Insecta	Lepidoptera	Tineidae	Opogona	Opogona glycyphaga	158	0	0	0	0	0	0	0	0	0	0	0	0	0	0	0	0	0	0	0	0	0	0	0	0	0	0	12	0	0	3	0	0	0	0	0	0	0	0	0	0	0
ASV891	ACTATCATCTAATATTGCCCATGGAGGTGGATCTGTAGACTTAGCTATTTTCTCTTTACACTTAGCAGGTATTTCTTCAATTTTAGGAGCCGCTAATTTTATTACAACAACAATCAATATACGACCAAATAATATATCATTCGATAAAATACCATTATTTGTATGATCTGTGGCAATTACAGCTTTACTTCTTTTACTTTCATTA	Arthropoda	Insecta	Lepidoptera	Tineidae	Opogona	Opogona omoscopa/sacchari	213	0	0	0	0	0	0	0	0	0	0	0	0	0	18	0	0	0	0	0	0	0	0	0	0	0	0	0	0	0	0	0	0	0	0	0	0	0	0	0	0	0
ASV892	ACTATCATCTAATATTGCTCATAATGGAGGATCTGTTGATATAGCAATTTTTTCTCTACACCTAGCTGGAATTTCCTCAATTTTAGGTGCAGTAAATTTTATTACAACAATAATTAATATACGAACAAAAGGAATAACTTTTGATCAAATACCTCTTTTTGTTTGAGCAGTGGCTATTACTGCTCTTCTTTTACTATTATCACTA	Arthropoda	Insecta	Lepidoptera	Tineidae	Tineidae sp.	Tineidae sp.	26150	0	0	0	0	0	0	0	0	0	0	0	0	0	0	0	0	0	0	0	0	0	0	0	0	0	0	0	0	0	0	0	0	0	0	0	0	0	0	0	0	0
ASV893	CCTTTCTTCAAATATTGCTCATAGAGGAAGTTCTGTAGATTTAGCAATTTTTTCTTTACATTTAGCTGGAATTTCATCAATTTTAGGAGCTGTAAATTTTATTACAACTATTATTAACATACGACCTAATAACATATCCTTAGATCAAATACCTTTATTTGTTTGATCTGTCGGTATTACAGCTTTATTATTACTCCTATCATTA	Arthropoda	Insecta	Lepidoptera	Tortricidae	Capua	Capua dura	326264	22510	30904	0	7	4	6	4	0	16	4	0	6	0	53	94	0	0	0	1	0	1018	35	0	0	0	0	0	0	19	21	156	0	199	104	109	0	0	0	0	0	0
ASV894	ACTTTCATCAAATATTGCCCATAGTGGAAGTTCAGTAGATTTAGCAATTTTTTCTTTACATTTAGCAGGAATTTCTTCTATTTTAGGTGCTGTAAATTTTATTACAACTATTATTAATATACGCCCTAATAACATATCTTTAGATCAAATACCATTATTTGTTTGATCTGTGGGAATTACAGCCTTATTATTATTATTATCATTA	Arthropoda	Insecta	Lepidoptera	Tortricidae	Capua	Capua sp. KF399658.1	40	0	0	0	0	0	0	0	0	0	0	0	0	0	0	0	0	0	0	0	0	0	0	0	0	0	0	0	0	0	0	0	0	0	9	0	0	0	0	0	0	0
ASV895	ACTTTCATCTAATATTGCTCATAGAGGAAGTTCTGTAGATTTAGCTATTTTTTCTTTACACTTAGCTGGTATTTCATCTATTTTAGGAGCTGTTAATTTTATTACAACTATTATTAATATACGACCTAATAATATATCATTAGATCAAATACCTTTATTTGTTTGAGCAGTGGGAATTACAGCACTTTTATTACTACTATCTTTA	Arthropoda	Insecta	Lepidoptera	Tortricidae	Crocidosema	Crocidosema plebejana	40399	0	2	3	0	0	0	0	0	0	0	0	39652	1	12	0	0	0	0	0	0	0	0	0	0	0	0	0	0	0	0	0	0	0	0	0	0	0	0	0	0	0
ASV896	ACTCTCATCAAATATTGCTCACAGAGGAAGATCAGTAGATCTTGCAATTTTTTCATTACATTTAGCTGGAATTTCATCAATTTTAGGAGCAGTAAATTATATTACCACTATTATTAATATACGGCCTAATAATATATCATTAGATCAAATACCCCTATTTGTTTGATCAGTTGGTATTACAGCCCTTTTACTATTACTCTCATTA	Arthropoda	Insecta	Lepidoptera	Tortricidae	Epiphyas	Epiphyas dotatana/postvittana	163	0	0	0	0	0	0	0	0	0	0	0	0	0	0	0	0	0	0	0	0	0	0	0	0	0	0	0	163	0	0	0	0	0	0	0	0	0	0	0	0	0
ASV897	ACTTTCATCTAATATTGCTCATAGAGGAAGATCAGTAGATCTTGCAATTTTTTCTTTACATTTAGCTGGAATTTCATCTATTTTAGGAGCTGTAAATTTTATTACTACTATTATTAACATACGACCAAATAATATATCTTTAGATCAAATACCTTTATTTGTTTGATCAGTGGGAATTACAGCCCTTTTATTATTACTTTCGTTA	Arthropoda	Insecta	Lepidoptera	Tortricidae	Merophyas	Merophyas divulsana	5527	0	0	0	0	0	0	0	0	0	0	0	0	0	0	0	0	0	0	0	0	0	0	0	0	0	0	0	0	0	0	0	0	0	0	0	0	0	0	0	0	0
ASV898	ACTTTCATCTAATATTGCCCATAGAGGTAGTTCTGTAGACTTAGCTATTTTTTCACTACATTTAGCAGGTATTTCATCAATTTTAGGAGCTGTTAATTTTATTACAACAATTATTAACATACGACCAAATAATATATCATTAGACCAAATACCTTTATTTGTTTGAGCTGTCGGTATTACAGCTCTTTTATTATTACTTTCTCTA	Arthropoda	Insecta	Lepidoptera	Tortricidae	Strepsicrates	Strepsicrates macropetana	118	0	0	0	0	0	0	0	0	0	0	0	0	0	0	0	0	0	0	0	0	0	0	0	0	0	0	0	0	3	4	108	0	0	0	0	0	0	0	0	0	0
ASV899	ACTTTCATCTAATATTGCCCACAGAGGAAGTTCAGTAGACTTAGCTATTTTTTCACTTCATTTAGCAGGTATTTCATCAATTTTAGGAGCTGTTAATTTTATTACCACTATTATTAATATACGACCTAATAGTATATCCTTAGATCAAATACCTTTATTTGTATGATCTGTTGGAATCACAGCTCTTTTACTTCTTTTATCTTTA	Arthropoda	Insecta	Lepidoptera	Tortricidae	Tortricidae	Tortricidae sp.	450	0	0	0	0	0	0	0	0	0	0	0	0	0	0	0	0	0	0	0	0	0	0	0	0	0	0	0	0	0	0	0	0	0	0	0	0	0	0	0	0	0
ASV900	ACTTTCAGCAAGAATTGCACATGCAGGTCCTGCAGTTGACTTAACCATTTTTTCTTTACATCTTGCAGGAATATCTAGAATTATAGGAGCAGTAAATTTTATTACTACTATAATTAATATAAAACCATTATATATAAATCAAACACAAGTACCTCTTTTTGTTTGATCAGTTGGTATTACTGCCCTTCTTTTACTATTATCCCTT	Arthropoda	Insecta	Mantodea	Mantidae	Archimantis	Archimantis sobrina	127	0	0	0	0	0	0	0	0	0	0	0	0	0	0	0	0	0	0	0	0	0	0	0	0	0	0	0	0	0	0	0	0	0	0	0	0	0	0	0	0	0
ASV901	CTTTCAGCAAGTATTGCACATGCAGGACCTGCAGTTGATTTAACAATTTTCTCTCTTCACTTAGCAGGAATATCCAGAATTATAGGAGCCGTAAATTTTATTACAACTATAATTAATATAAAACCATTATATATAAATCAAACACAAATTCCTCTTTTTGTTTGATCAGTTGGTATTACAGCTTTACTATTATTATTATCATTA	Arthropoda	Insecta	Mantodea	Mantidae	Sphodropoda	Sphodropoda sp.	30	0	0	0	0	0	0	0	0	0	0	0	0	0	0	0	0	0	0	0	0	0	0	0	0	0	0	0	0	0	0	0	0	0	0	0	0	0	0	0	0	0
ASV902	TCTTTCTGCTAGAATTGCTCATGCCGGAGCATCTGTTGATTTAGCAATTTTTAGTTTACATTTAGCTGGAATTTCTTCTATTTTAGGAGCTGTAAATTTTATTACTACAGTTATTAATATACGATTAAGTTATATAACTTTAGATCGAATACCTTTATTTGTTTGATCAGTAGTTATTACTGCTTTATTACTTTTATTATCTTTA	Arthropoda	Insecta	Neuroptera	Chrysopidae	Apertochrysa	Apertochrysa sp.	95619	0	0	0	0	0	0	0	0	0	0	0	0	0	0	0	0	0	0	0	0	0	0	0	0	0	0	0	0	0	0	0	0	0	0	0	0	0	0	0	0	0
ASV903	TTTATCTTCTAGAATTGCTCATGCTGGTGCTTCTGTAGACTTAGCTATTTTTAGATTACATTTAGCTGGAATTTCTTCTATTTTAGGTGCTGTAAATTTTATTACAACTGTTATTAATATACGATTAAATTATATAACTTTAGATCGAATACCTTTATTTGTTTGATCAGTAGTAATTACAGCTTTATTACTTTTATTATCTTTA	Arthropoda	Insecta	Neuroptera	Chrysopidae	Mallada	Mallada signatus	29891	0	0	1	0	0	10	0	0	2	0	2	0	4	67	0	0	0	0	0	0	0	0	0	0	0	0	4	0	0	6	19	0	164	0	0	0	0	0	0	0	0
ASV904	TCTTTCTTCAAATATTGCACATTCTGGAAGTTCTGTTGATTTAGCCATTTTTAGTTTACATTTAGCAGGAGTATCCTCAATTTTAGGTGCTATTAATTTTATTACTACAGTTATTAACATACGACCTAGAGGTATATCTTTAGAACGAATACCTTTATTTGTTTGATCTGTAGTAATTACAGCTTTTTTACTTTTATTATCCTTA	Arthropoda	Insecta	Neuroptera	Coniopterygidae	Coniopterygidae sp.	Coniopterygidae sp.	8144	0	0	0	0	0	0	0	0	0	0	0	0	0	0	0	0	0	0	0	0	0	0	0	0	0	0	0	0	0	0	0	0	0	0	0	0	0	0	0	0	0
ASV905	CCTTTCATCAAGATTAGCTCACGCAGGAGCATCTGTAGATTTAGCTATTTTCAGACTACACCTAGCAGGAGTATCATCAATTTTAGGTGCTGTAAATTTTATTACAACTGTAATTAATATACGATTATCTTATATAACTTTAGACCGAATACCTTTATTTGTTTGATCTGTAGTTATTACAGCCTTACTTTTACTTTTATCTTTA	Arthropoda	Insecta	Neuroptera	Hemerobiidae	Micromus	Micromus tasmaniae	426069	18675	27550	4	66450	62	65773	15667	16452	3	29441	0	14	39	5	11	10	0	111	0	0	2353	1	28	0	0	0	7103	111	0	1	5	0	0	92	27	0	0	0	0	0	0
ASV906	TTTATCAGCAGGAATTGCTCATGCAGGAGCCTCAGTTGACCTAGCAATTTTCAGTCTTCATCTAGCAGGAGTATCTTCAATTTTAGGAGCAGTTAATTTTATTACTACAGTAATTAATATACGATTATCTTATATGACTTTAGATCGAATGCCTTTATTTGTTTGATCTGTAGTTATTACAGCTATTCTTCTTTTATTATCACTA	Arthropoda	Insecta	Neuroptera	Myrmeleontidae	Myrmeleontidae sp.	Myrmeleontidae sp. 1	111345	0	0	0	0	0	0	0	0	0	0	0	0	0	0	0	0	0	0	0	0	0	0	0	0	0	0	0	0	0	0	0	0	0	0	0	0	0	0	0	0	0
ASV907	ACTATCAGCAGGAATTGCTCATGCTGGAGCATCAGTTGATTTAGCCATCTTTAGCTTACATCTAGCCGGAGTCTCCTCTATTCTAGGTGCAGTAAATTTTATTACTACTGTAATTAATATACGTTTATCTTACATAACTTTAGACCGAATACCATTATTCGTTTGATCTGTAGTTATTACAGCCATTCTACTTTTACTATCCCTA	Arthropoda	Insecta	Neuroptera	Myrmeleontidae	Myrmeleontidae sp.	Myrmeleontidae sp. 2	25415	0	0	0	0	0	0	0	0	0	0	0	0	0	0	0	0	0	0	0	0	0	0	0	0	0	0	0	0	0	0	0	0	0	0	0	0	0	0	0	0	0
ASV908	ATTATCCGCAGGTATTGCTCATGCTGGAGCATCTGTGGATTTAGCAATCTTCAGTTTACATCTAGCCGGTGTATCCTCCATTCTTGGGGCAGTTAATTTTATTACCACAGTTATTAATATACGATTATCTTACATAACTTTAGATCGAATACCATTATTTGTTTGATCAGTAGTTATTACAGCTATTTTATTACTTCTCTCATTA	Arthropoda	Insecta	Neuroptera	Myrmeleontidae	Myrmeleontidae sp.	Myrmeleontidae sp. 3	28913	0	0	0	0	0	0	0	0	0	0	0	0	0	0	0	0	0	0	0	0	0	0	0	0	0	0	0	0	0	0	0	0	0	0	0	0	0	0	0	0	0
ASV909	ACTTTCAGCTGGAATTGCTCATGCTGGAGCATCTGTTGATCTAGCCATCTTTAGTCTTCACTTAGCTGGTGTTTCCTCAATTCTAGGAGCAGTAAATTTCATTACTACTGTTATTAATATACGTTTATCTTACATAACTTTAGACCGTATACCCTTATTTGTTTGATCCGTTGTAATTACTGCTATTTTACTACTTCTATCTTTA	Arthropoda	Insecta	Neuroptera	Myrmeleontidae	Myrmeleontidae sp.	Myrmeleontidae sp. 4	1494	0	0	0	0	0	0	0	0	0	0	0	0	0	0	0	0	0	0	0	0	0	0	0	0	0	0	0	0	0	0	0	0	0	0	0	0	0	0	0	0	0
ASV910	ATTAGCAGGAGCCATTGCACATGCTGGAGCATCAGTTGATTTAACAATCTTCTCATTACATTTAGCAGGAGTGTCATCAATTTTAGGTGCAATCAATTTTATTACCACTACTATTAATATAAAGCCCCCAGGAATAAAAATAGATCAATTACCCCTATTTGTATGAGCAGTAGTAATTACTGCAGTATTATTATTATTGTCACTA	Arthropoda	Insecta	Odonata	Coenagrionidae	Xanthagrion	Xanthagrion erythroneurum	2	0	0	0	0	0	0	0	0	0	0	0	0	0	0	0	0	0	0	0	0	0	0	0	0	0	0	0	0	0	0	0	0	0	0	0	0	0	0	0	0	0
ASV911	ACTGGCAGGAGCTATTGCCCACGGGGGAGCCTCAGTAGATCTAGCAATCTTCTCATTACATTTAGCAGGTGTATCGTCAATTCTAGGAGCAGTTAATTTTATTACGACAGCAATTAATATACGATCAGAAAGAATAACAATAGACCAAACACCCTTATTTGTATGATCAGTAGCCATTACAGCCCTATTACTACTTCTATCACTA	Arthropoda	Insecta	Orthoptera	Acrididae	Acrididae sp.	Acrididae sp. 1	188966	0	0	0	0	0	0	0	0	0	0	0	0	0	0	0	0	0	0	0	0	0	0	0	0	0	0	0	0	0	0	0	0	0	0	0	0	0	0	0	0	0
ASV912	ACTAGCAGGAGCTATTGCCCATGGGGGAGCTTCAGTAGATCTAGCAATTTTCTCACTACATCTAGCAGGTGTTTCATCAATTCTAGGAGCAGTCAACTTTATTACAACAGCAATTAATATACGATCAGAAAGAATAACATTAGATCAAACCCCATTATTTGTATGATCAGTAGCAATCACCGCACTCCTTCTTTTACTTTCACTA	Arthropoda	Insecta	Orthoptera	Acrididae	Acrididae sp.	Acrididae sp. 10	1610	0	0	0	0	0	0	0	0	0	0	0	0	0	0	0	0	0	0	0	0	0	0	0	0	0	0	0	0	0	0	0	0	0	0	0	0	0	0	0	0	0
ASV916	ATTAGCAGGAGCTATTGCTCATGGAGGAGCCTCTGTAGACCTAGCAATTTTCTCACTACATCTAGCAGGTGTATCATCAATTCTAGGAGCAGTTAATTTTATTACAACAGCAATTAATATACGATCAGAAAGTATAACTCTAGATCAAACACCATTATTTGTTTGATCAGTAGCAATTACAGCCTTACTTCTCCTTTTATCATTA	Arthropoda	Insecta	Orthoptera	Acrididae	Acrididae sp.	Acrididae sp. 14	260	0	0	0	0	0	0	0	0	0	0	0	0	0	0	0	0	0	0	0	0	0	0	0	0	0	0	0	0	0	0	0	0	0	0	0	0	0	0	0	0	0
ASV917	ACTGGCAGGAGCTATTGCTCATGGAGGAGCTTCAGTAGATCTAGCAATCTTCTCACTACACTTAGCAGGTGTATCATCAATTCTAGGAGCAGTTAATTTTATTACAACAGCAATCAATATACGATCAGAAAGAATAACTCTAGATCAAACACCTTTATTTGTATGATCAGTAGCTATTACAGCCTTATTACTTCTTTTACCTTTA	Arthropoda	Insecta	Orthoptera	Acrididae	Acrididae sp.	Acrididae sp. 15	92	0	0	0	0	0	0	0	0	0	0	0	0	0	0	0	0	0	0	0	0	0	0	0	0	0	0	0	0	0	0	0	0	0	0	0	0	0	0	0	0	0
ASV918	ACTAGCAGGAGCTATTGCCCATGGGGGGGCTTCAGTAGATCTAGCAATCTTCTCATTACATTTAGCAGGTGTATCATCAATTCTAGGAAGAGTTAATTTTATCACAACAGCAATTAATATACGATCAGAAAGAATAACTATAGATCAGACACCTTTATTTGTATGATCAGTAGCCATAACAGCTTTATTGCTTCTTCTATCTTTA	Arthropoda	Insecta	Orthoptera	Acrididae	Acrididae sp.	Acrididae sp. 16	90	0	0	0	0	0	0	0	0	0	0	0	0	0	0	0	0	0	0	0	0	0	0	0	0	0	0	0	0	0	0	0	0	0	0	0	0	0	0	0	0	0
ASV922	CCCCTAGCAGGGGCTATTGCCCACGGAGGAGCCTCAGTAGATCTAGCAATCTTCTCATTACACTTAGCAGGTGTATCATCAATTCTAGGAGCAGTTAACTTTATTACGACAGCAATTAATATACGATCAGAAAGAATAACTATAGATCAAACACCTTTATTTGTTTGATCAGTAGCCATCACAGCCCTATTGATCCTTCTATCACTA	Arthropoda	Insecta	Orthoptera	Acrididae	Acrididae sp.	Acrididae sp. 2	203	0	0	0	0	0	0	0	0	0	0	0	0	0	0	0	0	0	0	0	0	0	0	0	0	0	0	0	0	0	0	0	0	0	0	0	0	0	0	0	0	0
ASV923	ACTAGCAGGGGCTATTGCCCATGGGGGCGCATCAATTGATTTAGCTATTTTTTCCTTGCATTTAGCTGGTGTATCTTCAATTTTAGGTGCAGTTAACTTTATTACAACAGCAATTAATATACGATCAGAAAGAATAACTTTAGATCAAACACCACTATTTGTATGATCAGTAGCCATTACAGCTTTATTGCTTCTATTATCTTTA	Arthropoda	Insecta	Orthoptera	Acrididae	Acrididae sp.	Acrididae sp. 3	1209	0	0	0	0	0	0	0	0	0	0	0	0	0	0	0	0	0	0	0	0	0	0	0	0	0	0	0	0	0	0	0	0	0	0	0	0	0	0	0	0	0
ASV924	ATTAGCAGGGGCTATCGCCCACAGAGGGGGATCAGTAGATTTAGCAATTTTCTCATTACATCTAGCAGGTGTATCTTCAATTCTAGGAGCAGTAAACTTCATTACAACCGCAATCAATATACGATCAGAAAGAATAACATTAGATCAAACACCACTATTTGTTTGATCAGTAGCCATTACAGCTCTTCTTCTTCTTCTATCATTA	Arthropoda	Insecta	Orthoptera	Acrididae	Acrididae sp.	Acrididae sp. 4	1403	0	0	0	0	0	0	0	0	0	0	0	0	0	0	0	0	0	0	0	0	0	0	0	0	0	0	0	0	0	0	0	0	1403	0	0	0	0	0	0	0	0
ASV926	ATTAGCAGGAGCTATTGCCCACGGAGGGGGATCAGTAAATTTAGCAATTTTTTCATTACATCTAGCAGGTGTATCATCAATTCTAGGAGCAGTAAATTTTATTACAACTGCAATTAATATATGATCAGAAAGAATAACATTAGATCAAACACCATTATTTGTATGATCAGTAGCCATTACAGCTCTTCTTCTTCTTTTATCACTA	Arthropoda	Insecta	Orthoptera	Acrididae	Acrididae sp.	Acrididae sp. 6	375	0	0	0	0	0	0	0	0	0	0	0	0	0	0	0	0	0	0	0	0	0	0	0	0	0	0	0	0	0	0	0	0	375	0	0	0	0	0	0	0	0
ASV927	ATTAGCAGGAGCTATTGCCCACAGAGGGGGGTCAGTAGATTTAGCAATTTTTTCATTACACCTAGCAGGTGTATCATCAATTCTAGGAGCAGTAAATTTTATCACAACTGCAATTAATATACGATCAGAAAGAATAACATTAGATCAAACACCACTATTTGTATGATCAGTAGCCATTACAGCCCTTCTTCTTCTACTATCATTA	Arthropoda	Insecta	Orthoptera	Acrididae	Acrididae sp.	Acrididae sp. 7	175	0	0	0	0	0	0	0	0	0	0	0	0	0	0	0	0	0	0	0	0	0	0	0	0	0	0	0	0	0	0	0	0	175	0	0	0	0	0	0	0	0
ASV930	ACTAGCAGGAGCTATTGCTCATGGGGGAGCCTCAGTAGATCTAGCAATCTTCTCATTACATTTAGCAGGTGTATCATCAATTCTAGGAGCAGTCAATTTTATTACAACAGCAATTAATATACGATCAGAAAGAATAACTATGGATCAAACACCCTTATTTGTATGATCAGTAGCCATTACAGCCCTATTACTACTCCTATCCTTA	Arthropoda	Insecta	Orthoptera	Acrididae	Apotropis	Apotropis sp. 1	6747	0	0	0	0	0	0	0	0	0	0	0	0	0	0	0	0	0	0	0	0	0	0	0	0	0	0	0	0	0	0	0	0	0	0	0	0	0	0	0	0	0
ASV931	ACTAGCAGGAGCTATTGCCCATGGAGGAGCCTCAGTAGATCTAGCAATCTTCTCATTACATTTAGCTGGTGTATCATCAATTCTAGGAGCAGTTAATTTTATTACGACAGCAATTAATATACGATCAGAAAGAATAACTATAGATCAAACACCTTTATTTGTGTGATCAGTAGCCATTACAGCCCTATTACTCCTTCTATACCTA	Arthropoda	Insecta	Orthoptera	Acrididae	Apotropis	Apotropis sp. 2	1152	0	0	0	0	0	0	0	0	0	0	0	0	0	0	0	0	0	0	0	0	0	0	0	0	0	0	0	0	0	0	0	0	0	0	0	0	0	0	0	0	0
ASV932	ACTAGCAGGAGCTATTGCCCACGGAGGAGCCTCAGTAGATCTAGCAATCTTCTCATTACATTTAGCAGGTGTATCATCAATTCTAGGAGCAGTTAATTTTATTACGACAGCAATTAATATACGATCAGAAAGAATAACTATAGATCAAACACCTTTATTTGTGTGATCAGTAGCCATTACAGCCCTATTACTACTTCTATCCTTA	Arthropoda	Insecta	Orthoptera	Acrididae	Apotropis	Apotropis sp. 3	862	0	0	0	0	0	0	0	0	0	0	0	0	0	0	0	0	0	0	0	0	0	0	0	0	0	0	0	0	0	0	0	0	0	0	0	0	0	0	0	0	0
ASV933	ACTAGCAGGAGCTATTGCCCATGGAGGAGCCTCAGTAGACCTAGCAATCTTCTCATTACATTTAGCAGGTGTATCATCAATTCTAGGAGCAGTTAATTTTATTATGACAGCAATTAATATACGATCAGAAAGAATAACTATAGATCAAACACCTTTATTTGTGTGATCAGTAGCCATCACAGCCCTATTGCTCCTTCTATCCTTA	Arthropoda	Insecta	Orthoptera	Acrididae	Apotropis	Apotropis sp. nr vittata	1011	0	0	0	0	0	0	0	0	0	0	0	0	0	0	0	0	0	0	0	0	0	0	0	0	0	0	0	0	0	0	0	0	0	0	0	0	0	0	0	0	0
ASV934	ACTTGCAGGAGCTATTGCTCACGGGGGAGGATCAGTTGACCTAGCAATCTTCTCATTACATCTAGCCGGTGTATCATCAATTTTAGGTGCAGCAAACTTCATTACAACAGCAATTAATATACGATCAGAAAGAATAACATTAGATCAAACACCACTATTTGTATGATCTGTTGTTATTACAGCAATTCTTCTATTATTATCATTA	Arthropoda	Insecta	Orthoptera	Acrididae	Ecphantus	Ecphantus quadrilobus	6997	0	0	0	0	0	0	0	0	0	0	0	0	0	0	0	0	0	0	0	0	0	0	0	0	0	0	0	0	0	0	0	0	0	0	0	0	0	0	0	0	0
ASV935	ACTTGCCGGAGCAATTGCCCATGGAGGAGCATCAGTAGACCTAGCTATTTTCTCATTACACCTAGCAGGTATTTCATCAATTCTTGGTGCAGTTAATTTTATTACAACAGCAATCAATATACGATCAGAAAGAATAACTATAGAACAAACACCACTATTTGTTTGATCAGTAGCTATTACAGCCATTCTACTTTTACTTTCACTA	Arthropoda	Insecta	Orthoptera	Acrididae	Pycnostictus	Pycnostictus nr seriatus	132080	0	0	0	0	0	0	0	0	0	0	0	0	0	0	0	0	0	0	0	0	0	0	0	0	0	0	0	0	0	0	0	0	0	0	0	0	0	0	0	0	0
ASV936	GCTTGCAGGAGCAATTGCCCATGGAGGGGCATCAATAGATTTAGCTATTTTCTCACTACACCTTGCAGGTATTTCATCAATTCTAGGTGCAGTTAATTTCATTACAACAGCAATTAATATACGATCAGAAAGAATAACTATAGAACAAACACCATTATTTGTTTGATCAGTAGCTATTACAGCCATTTTACTTTTATTACCACTA	Arthropoda	Insecta	Orthoptera	Acrididae	Pycnostictus	Pycnostictus sp.	373	0	0	0	0	0	0	0	0	0	0	0	0	0	0	0	0	0	0	0	0	0	0	0	0	0	0	0	0	0	0	0	0	0	0	0	0	0	0	0	0	0
ASV937	CTTATCCTCTCTAATCTCCCATAGAGGGGCATCAGTTGATTTAGCAATCTTCTCATTGCATCTAGCAGGTATTTCCTCAATTTTAGGTGCTGTAAATTTTATTACAACCATAATTAATATACGCGCCCCCGGAATATCATTAGATCAAACTCCCTTATTTGTTTGAGCTGTAGGAATTACAGCCCTTCTTCTTCTTCTTTCCTTA	Arthropoda	Insecta	Orthoptera	Gryllidae	Pteronemobius	Pteronemobius ornaticeps	35744	0	0	0	0	0	0	0	0	0	0	0	0	0	0	0	0	0	0	0	0	0	0	0	0	0	0	0	0	0	0	0	0	0	0	0	0	0	0	0	0	0
ASV938	TTTATCTTCTAATATTGCTCATGCAGGATCTTCTGTAGACTTAACTATTTTTTCTTTACATTTAGCAGGAGTATCCTCAATTTTAGGAGCAGTTAATTTTATTACTACTATAATTAATATACGTTCCCCAGGAATATCTTTAGATCAAACCCCCTTATTCGTTTGAGCTGTAGGTATTACTGCTCTTCTCCTTTTATTATCTTTA	Arthropoda	Insecta	Orthoptera	Gryllotalpidae	Gryllotalpa	Gryllotalpa pluvialis	949356	0	0	0	0	0	0	0	0	0	0	0	0	0	0	0	0	0	0	0	0	0	0	0	0	0	0	0	0	0	0	0	0	0	0	0	0	0	0	0	0	0
ASV939	GCTTTCAGCCGGTATTGCCCATGGAGGGGCTTCTGTAGATTTAGCTATCTTCTCCTTACACCTAGCAGGTATTTCATCTATTTTAGGGGCTGTAAATTTTATTACAACCACAATTAACATACGATCACCTGGGATATCTTTAGACCAAACCCCGTTATTTGTTTGAGCAGTTGCAATCACCGCTCTACTACTACTACTATCTTTA	Arthropoda	Insecta	Orthoptera	Tettigoniidae	Ephippitytha	Ephippitytha maculata	793	0	0	0	0	0	0	0	0	0	0	0	0	0	0	0	0	0	0	0	0	0	0	0	0	0	0	0	0	0	0	0	0	0	0	0	0	0	0	0	0	0
ASV940	TCTTTCTAGTGCTATTGCACATTCAGGGGCTTCAGTAGATTTAACAATTTTTTCTTTACATTTAGCTGGAGTAAGCTCAATTTTAGGAGCAGTAAATTTTATTACTACTATTATTAATATACGATCAGATGGATTATCTTTTGAACGTATACCATTATTTATTTGGTCTGTATTCATTACAGCAATTTTACTATTACTTTCTTTA	Arthropoda	Insecta	Psocodea	Elipsocidae	Propsocus	Propsocus pulchripennis	4187	0	0	0	0	0	2	0	0	0	0	0	0	0	0	0	0	0	0	0	0	0	0	0	0	0	0	0	0	0	0	0	0	0	0	11	0	0	0	0	0	0
ASV941	TCTATCAAGTGTTATTGCCCATACAGGAGCATCTGTTGATTTAGCTATTTTTTCACTTCATTTAGCTGGTGTTAGTTCAATTTTAGGTGCCGTAAATTTTATTACAACAATTATTAATATGCGATCAAACGGTTTAACTTTAGAACGAATACCTTTATTTGTTTGATCTGTATTTATTACAGCAATTTTATTATTGTTATCTCTT	Arthropoda	Insecta	Psocoptera	Ectopsocidae	Ectopsocus	Ectopsocus meridionalis	5941	0	0	0	0	0	0	0	0	0	0	0	0	0	0	0	0	0	0	0	0	0	0	0	0	0	0	0	0	0	0	0	0	0	0	0	0	0	0	0	0	0
ASV942	TCTCTCCCAGGTCCTAGCGCACCCTAATGAGGGTGTGGATTTGGCAATTTTTTCTTTACATTTAGCCGGGGCAAGCTCTATTTTAGGGGCTATTAACTTTATTACCACATTTTTTAACCTCTGGGTTTTTAAGGAAAAATTGGAATTAAGAAGGTTGTTTTCCTGGGCAGTTATGTTTACAGCTGTTCTTCTTTTACTTTCCCTT	Arthropoda	Insecta	Psocoptera	Liposcelididae	Liposcelis	Liposcelis brunnea	13	0	0	0	0	0	0	0	0	0	0	0	0	0	13	0	0	0	0	0	0	0	0	0	0	0	0	0	0	0	0	0	0	0	0	0	0	0	0	0	0	0
ASV943	TCTTTCTGGCCCAATTGCTCACGCAGGCCCTTCCGTTGATTTAGCAATTTTTTCTCTTCATTTAGCAGGGATTAGATCAATTTTAGGGGCTGTAAACTTTATTTCTACAGTTATCAATATACGATCACAAGGTATAACTTTTGAACGATTACCCCTACTTGTTTGATCTGTATTAATCACAGCCGTTTTACTTCTTCTTTCACTT	Arthropoda	Insecta	Psocoptera	Trogiidae	Cerobasis	Cerobasis guestfalica	1455	190	294	0	0	0	0	0	0	0	0	0	0	0	0	0	0	0	0	0	0	0	0	0	0	0	0	0	0	0	0	0	0	0	0	0	0	0	0	0	0	0
ASV944	TCTCGCAAGAGGAATTGCACACGCCGGAGCATCCGTAGACTTAGCCATCTTCTCACTACACCTAGCAGGTGTATCATCAATTCTAGGAGCAGTAAACTTCATTTCAACAACAATCAACATAAAACCAAAGAGTATAAAACCTGAACGGATCCCACTATTTGTATGATCAGTTGCCATCACAGCACTACTATTACTACTATCGCTA	Arthropoda	Insecta	Termitoidae	Rhinotermitidae	Coptotermes	Coptotermes acinaciformis	145676	0	0	0	44	10915	37124	0	0	186	0	0	0	5406	10244	0	0	0	0	0	0	0	0	0	0	0	0	11846	0	145	0	0	0	701	0	0	0	0	0	0	0	0
ASV945	TCTTGCAAGAGGAATTGCCCATGCCGGAGCATCAGTAGACTTAGCCATCTTCTCCCTACATTTAGCCGGAGTGTCCTCCATCCTAGGAGCAGTAAACTTTATCACAACAGCAATCAATATAAAGCCAAAGAGCATAAAGCCCGAACGAATTCCACTATTCGTATGATCAATTGCCATTACTGCTCTACTGCTATTGTTATCTTTA	Arthropoda	Insecta	Termitoidae	Termitidae	Amitermes	Amitermes sp. 1	161	0	0	0	0	0	0	0	0	0	0	0	0	0	0	0	0	0	0	0	0	0	0	0	0	0	0	0	0	0	0	0	0	0	0	0	0	0	0	0	0	0
ASV946	TCTTGCAAGAGGAATTGCCCACGCCGGAGCATCAGTAGACCTTGCCATCTTCTCCCTACATTTAGCCGGAGTGTCATCCATCCTAGGAGCAGTAAACTTTATCACAACAACAATCAATATAAAGCCAAAGAGCATAAAGCCAGAACGAATTCCGCTATTCGTACGATCAATTGCCATTACTGCTCTACTGCTACTATTATAATTA	Arthropoda	Insecta	Termitoidae	Termitidae	Amitermes	Amitermes sp. 2	77	0	0	0	0	0	0	0	0	0	0	0	0	0	0	0	0	0	0	0	0	0	0	0	0	0	0	0	0	0	0	0	0	0	0	0	0	0	0	0	0	0
ASV947	TCTTGCAAGAGGAATTGCCCATGCTGGAGCATCAGTAGACTTAGCCATCTTCTCACTACATTTAGCCGGAGTATCATCTATCCTAGGAGCAGTAAACTTTATTACAACAACAATCAATATAAAACCAAAGAGCATAAAACCTGAACGAATCCCACTATTTGTATGATCAATTGCCATTACTGCCCTACTACTATTATTATCTTTA	Arthropoda	Insecta	Termitoidae	Termitidae	Amitermes	Amitermes sp. nr MZ008507.1	140216	0	0	0	0	0	0	0	0	0	0	0	0	0	0	0	0	0	0	0	0	0	0	0	0	0	0	0	0	0	0	0	0	0	0	0	0	0	0	0	0	0
ASV948	TCTTGCAAGAGGAATCGCCCATGCCGGAGCATCAGTAGATTTGGCCATCTTCTCACTTCACTTAGCTGGTGTATCATCCATCCTAGGGGCAGTAAACTTTATCACAACAACAATCAACATGAAACCAAAGAGTATAAAACCTGAACGAATTCCACTATTTGTATGATCAATTGCCATTACTGCTCTACTACTACTGTTATCTTTA	Arthropoda	Insecta	Termitoidae	Termitidae	Amtermes	Amitermes sp. nr MZ008532.1	7472	0	0	0	0	0	0	0	0	0	0	0	0	0	0	0	0	0	0	0	0	0	0	0	0	0	0	0	0	0	0	0	0	0	0	0	0	0	0	0	0	0
ASV949	TCTCGCAAGAAGAATTGCTCATGCCGGAGCATCTGTAGACCTAGCCATCTTCTCTTTACATCTAGCAGGAGTATCATCTATCCTAGGAGCAGTAAACTTTATCACAAAACAATCAACATAAAGCCAAAAAGCATAAAACCTGAACGAATCCCCCTATTCGTATGATCAATTGCCATTATTGCCTTACTACTTCTACTATCCCTA	Arthropoda	Insecta	Termitoidae	Termitidae	Macrognathotermes	Macrognathotermes sp. nr errator	496	0	0	0	0	0	0	0	0	0	0	0	0	0	0	0	0	0	0	0	0	0	0	0	0	0	0	0	0	0	0	0	0	0	0	0	0	0	0	0	0	0
ASV950	TCTTGCAAGAGGAATTGCACATGCTGGAGCATCTGTAGACCTAGCCATCTTCTCCTTACACTTAGCAGGAGTATCATCAATTCTAGGGGCAGTAAACTTTATTACAACAACAATTAATATAAAGCCCAAAAGTATAAAGCCCGAACGAATTCCACTATTCGTATGATCAATTGCCATTACTGCCCTACTACTTCTTCTATCCCTA	Arthropoda	Insecta	Termitoidae	Termitidae	Microcerotermes	Microcerotermes sp. nr KY224512.1	775	0	0	0	0	0	0	0	0	88	429	0	0	31	0	0	0	0	0	0	0	0	0	0	0	0	0	0	0	0	0	0	0	0	0	0	0	0	0	0	0	0
ASV951	TCTCGCAAGAAGAATTGCCCATGCCGGAGCATCTGTAGACTTAGCCATCTTCTCTTTACACTTAGCAGGAGTGTCATCTATCCTAGGAGCAGTAAATTTCATCACAACAACAATCAACATAAAGCCAAAAAGCATAAAGCCTGAACGAATCCCCCTATTTGTATGATCAATTGCCATTACCGCCCTACTGCTTCTACTATCCCTA	Arthropoda	Insecta	Termitoidae	Termitidae	Termitidae sp.	Termitidae sp. 1	87961	0	0	0	0	0	0	0	0	0	0	0	0	0	0	0	0	0	0	0	0	0	0	0	0	0	0	0	0	0	0	0	0	0	0	0	0	0	0	0	0	0
ASV952	TCTTGCAAGAGGAATTGCTCATGCCGGAGCGTCTGTAGACCTAGCAATCTTCTCCTTACATCTAGCAGGAGTTTCATCCATCCTAGGAGCAGTAAACTTCATTACAACAACAATTAACATAAAACCAAAGAGCATAAAACCTGAACGAATTCCCCTATTTGTATGATCAATCGCCATTACCGCCCTACTACTTCTACTATCCCTA	Arthropoda	Insecta	Termitoidae	Termitidae	Termitidae sp.	Termitidae sp. 2	17869	0	0	0	0	0	0	0	0	0	0	0	0	0	0	0	0	0	0	0	0	0	0	0	0	0	0	0	0	0	0	0	0	0	0	0	0	0	0	0	0	0
ASV953	TTTGTCAACTTTTTTTCATTCTTCTATTTCCGTAGATTTAACTATTTTTTCTCTTCATTTAGCTGGAATTTCATCTATTTTAGGTGCTGTAAATTTTATTACTACTATTTTTTGTCTTCGTAATAAATTTGTGGGTTTAGAATTGTTACCTTTATTTTGTTGATCTGTCGTAATTACAGCCATTTTATTACTTTTATCTCTT	Arthropoda	Insecta	Thysanoptera	Aeolothripidae	Desmothrips	Desmothrips propinquus	409	4	4	7	0	0	0	0	0	0	0	0	0	0	0	0	0	0	0	0	0	0	0	0	0	0	0	0	0	0	0	0	0	0	0	0	0	45	0	0	0	0
ASV954	TCTTTCAACATTTTTTCATTCAGGAATTTCTGTTGATTTAACTATCTTTTCTCTTCATCTAGCAGGTGTTTCATCTATCCTAGGAGCTTTAAATTTTATTTCTACAATTTTAAATTTAAAAAGAAAAGATTTAAGATTTGAAAAAACTAGACTTTTTGTTTGATCAGTTATTTTAACAGCGATTCTTCTCCTTCTTTCTCTA	Arthropoda	Insecta	Thysanoptera	Thripidae	Anaphothrips	Anaphothrips sp.	1496	0	0	0	0	0	0	0	0	0	0	0	0	0	0	0	0	0	0	0	0	0	0	0	0	0	0	0	0	0	0	0	0	0	0	0	0	0	0	0	0	0
ASV956	TTTATCAACATTTTATCATTCAGGAATATCAGTAGATTTAACAATTTTTTCCTTGCACCTAGCAGGAATTTCATCAATTTTAGGAGCATTAAACTTCATTACAACAATTATAAATTTAAAAACTAAAAACCTTTCATCAAGTAAAATAAGACTATTTATTTGGTCAGTAGTATTAACAGCCATTCTCTTACTTCTTTCATTA	Arthropoda	Insecta	Thysanoptera	Thripidae	Arorathrips	Arorathrips mexicanus	30696	0	0	0	0	0	0	0	0	0	0	0	0	0	0	0	0	89	4	0	0	0	0	0	0	0	0	0	0	0	0	0	0	0	0	0	0	4	0	0	0	30
ASV958	TTTGTCAACTTTTTATCACTCTGGACCATCAGTAGATTTAACTATTTTTTCCCTTCATTTAGCAGGTATTTCTTCAATTCTAGGAGCTTTAAATTTTATTACAACGATTTTAAATTTAAAGATCAAAAAATTAACAACGGAAAAGATAACTTTATTTGTTTGATCAGTTATTTTAACAGCTATTTTATTATTATTGTCGTTA	Arthropoda	Insecta	Thysanoptera	Thripidae	Frankliniella	Frankliniella occidentalis	184983	681	892	9702	7	414	29	1945	2256	2200	0	1192	0	0	0	0	0	450	0	0	0	0	1	0	0	0	0	0	0	0	0	0	0	49	16	7	0	3758	7	4661	3998	2737
ASV959	TTTATCAACATTTTTTCACTCGGGAATTTCAGTAGATTTAACAATTTTTTCTCTTCATCTAGCAGGTATCTCATCAATCTTAGGAGCATTAAACTTTATTACTACTATTTTGAATTTAAAATTAAAAAATTTATCTAATGAAAAATCATCTTTATTTGTTTGATCAGTTTTTTTAACCGCCATTTTATTACTTCTTTCTCTA	Arthropoda	Insecta	Thysanoptera	Thripidae	Frankliniella	Frankliniella schultzei	339797	1128	1364	8956	54	425	553	1074	1129	4320	31	1218	0	0	0	1	0	0	0	9	23	0	0	0	0	0	0	0	0	0	4	156	0	0	0	13	0	4654	5	7885	7131	13358
ASV961	TCTTTCAACATTTTATCACTCTGGAATTTCAGTAGATTTAACAATCTTTTCTCTTCATCTAGCAGGAATTTCTTCTATTTTAGGTGCACTTAACTTTATTACAACTATTTTAAACTTAAAAATTAAAGGTCTTTCACCTGAATTTATTCCTTTATTTGTATGATCTGTAATTTTAACTGCTATTTTATTATTATTATCTTTA	Arthropoda	Insecta	Thysanoptera	Thripidae	Pseudanaphothrips	Pseudanaphothrips sp.	5375	0	0	0	0	0	0	0	0	0	0	0	0	0	0	0	0	0	0	0	0	0	0	0	0	0	0	0	0	0	0	0	0	0	0	0	0	0	0	0	0	0
ASV962	GTTGTCAACTTTTTATCACAGTGGGATCTCTGTTGACCTAACAATCTTTTCCCTTCATCTAGCAGGTATCTCATCAATTTTAGGAGCATTAAACTTTATTACGACGATTTTAAACTTAAAAATTAAAAAATTATCTTCAGAAAAGATTAGACTATTCACTTGATCAGTAATTTTAACAGCAATCCTACTGCTACTTTCATTA	Arthropoda	Insecta	Thysanoptera	Thripidae	Tenothrips	Tenothrips frici	1193	0	0	131	0	0	0	0	0	0	0	0	0	0	0	0	0	0	0	0	0	0	0	0	0	0	0	0	0	0	0	0	0	0	0	0	0	0	0	0	0	0
ASV963	ACTTTCAACATTTTATCATTCAGGAATTTCAGTAGACTTAACAATTTTTTCTTTACACTTAGCAGGGATTTCTTCAATTCTAGGAGCTTTAAATTTTATTACAACTATTCTAAACTTAAAAACAAAAAATCTTTCATCAGAAAAAATTTCCTTATTTGTTTGATCCGTTATTTTAACAGCCATTCTCTTATTACTATCATTA	Arthropoda	Insecta	Thysanoptera	Thripidae	Thripidae sp.	Thripidae sp. 1	1746	0	0	0	0	0	0	0	0	0	0	0	0	0	0	0	0	0	0	0	0	0	0	0	0	0	0	0	0	0	0	0	0	0	0	0	0	0	0	0	0	0
ASV964	ATTATCAACATTTTATCATTCAGGTATATCAGTAGATCTAACAATCTTTTCTCTTCACCTAGCAGGAATTTCATCAATTCTTGGAGCACTAAATTTTATTACAACAATCTTAAATTTAAAGTCTAAAAATTTATCTAGAGAAAAATTAAGATTATTTTCTTGATCAGTTTTACTAACAGCAATTCTACTTTTATTATCTCTT	Arthropoda	Insecta	Thysanoptera	Thripidae	Thripidae sp.	Thripidae sp. 2	1189	12	0	0	0	0	7	2	5	0	0	0	6	14	90	20	0	0	0	0	0	3	36	11	0	0	0	16	0	10	3	10	0	15	58	24	2	1	0	0	0	0
ASV965	ATTATCAACTTTTTATCATTCAGGAATTTCTGTAGATTTAACAATTTTTTCTCTTCATCTAGCAGGAATTTCATCAATTTTAGGGGCATTAAATTTTATTACCACAATTATTAATTTGAAAAATAAAGAACTTTCAGCAGAAAAATTGAGATTATTTGTTTGATCAGTGATATTAACAGCAATTCTTTTACTTTTATCATTA	Arthropoda	Insecta	Thysanoptera	Thripidae	Thrips	Thrips australis	39324	0	1	0	0	0	0	0	0	0	0	0	0	0	0	0	0	0	0	0	0	0	519	503	0	0	0	14	0	106	149	6143	0	3519	17	898	0	0	0	0	0	0
ASV966	ACTCTCAACTTTTTATCACTCAGGAATTTCAGTAGATTTAACAATCTTTTCTCTACATCTAGCAGGAATTTCGTCTATTCTAGGAGCATTAAATTTTATCACAACTATTATTAATTTAAAAGCTAAAAAATTATCAGCAGAAAAAATAAGATTATTTGTTTGATCAGTTATATTAACGGCTATTCTTTTACTATTATCTCTA	Arthropoda	Insecta	Thysanoptera	Thripidae	Thrips	Thrips sp. 1	59357	675	848	0	0	0	0	453	417	64	0	262	0	0	0	0	0	0	0	0	0	0	0	0	0	0	0	16	0	0	2	0	0	144	0	0	0	1263	0	0	0	665
ASV967	CCTCTCAACTTTTTATCACTCAGGAATTTCAGTGGATTTAACAATTTTTTCTCTTCATCTAGCAGGAATTTCATCTATTCTAGGAGCATTAAATTTTATTACAACTATTATTAATTTAAAAGCTAAAAAATTGTCAGCAGAAAAAATGAGATTATTTGTTTGATCAGTTATGTTAACAGCTATTCTTTTACTTTTATCTCTG	Arthropoda	Insecta	Thysanoptera	Thripidae	Thrips	Thrips sp. 2	3134	7	4	11	0	0	0	80	89	0	0	0	0	0	0	0	0	0	0	0	0	0	0	0	0	0	0	0	0	0	0	0	0	0	0	0	0	0	0	30	24	319
ASV968	CCTTTCAACTTTTTATCATTCAGGAATTTCAGTAGATTTAACAATTTTTTCTCTTCATTTAGCAGGAATTTCATCTATTTTAGGGGCATTAAACTTTATTACAACTATTATTAATTTAAAAGCCAAAAAATTATCAGCAGAGAAAATAAGATTATTTGTTTGATCAGTTATATTAACAGCTATTCTTTTACTATTATCATTG	Arthropoda	Insecta	Thysanoptera	Thripidae	Thrips	Thrips sp. 3	128967	111	164	0	0	0	0	165	237	246	0	1027	0	0	5	16	0	0	0	0	0	0	0	0	0	0	0	23	0	2450	141	6991	0	8187	0	3992	0	0	0	120	132	1258
ASV969	TCTTTCAACCTTTTATCATTCTGGAATTTCAGTAGATTTAACTATTTTTTCATTACATTTAGCAGGAATCTCCTCTATTTTAGGAGCTCTAAACTTTATTACAACTATTTTAAATTTAAAAATTAAAAAATTAACACCAGAACTTACCCCTTTATTTGTTTGATCAGTAATCCTAACAGCAATTCTTTTACTTCTCTCTTTA	Arthropoda	Insecta	Thysanoptera	Thripidae	Thrips	Thrips sp. 4	138594	0	0	405	0	7	0	36	44	461	0	0	0	0	0	0	0	0	0	0	0	2	0	0	0	0	0	0	0	0	0	0	0	0	0	0	0	2136	0	0	0	0
ASV970	TTTATCAACGTTTTATCATTCAGGACCTTCAGTAGACTTAACAATTTTTTCTTTACACCTTGCAGGGATTTCTTCAATTTTAGGTGCCTTAAATTTTATTACTACAATTATTAATCTTAAAGCAAAAAACCTTTCAGCAGAAAAAATTAGACTATTTGTCTGATCAGTTATTTTAACAGCCATTCTTCTTCTTTTATCTTTA	Arthropoda	Insecta	Thysanoptera	Thripidae	Thrips	Thrips tabaci	84112	280	352	773	4	81	0	510	558	690	0	1060	0	0	0	15	0	0	0	0	0	0	29	0	0	0	0	0	1	0	11	513	0	0	0	0	0	2127	2	752	715	1390
ASV971	ATTATCAACATTTTATCATTCAGGAATTTCAGTAGACTTAACAATTTTTTCTCTTCATTTGGCAGGAATTTCATCAATTTTAGGTGCTCTTAACTTTATCACAACTATCATTAATCTAAAAAGTAAAAATTTATCAGCAGAAAAAATGAGTCTTTTTATTTGATCAGTTATATTAACAGCAATTCTTCTACTTTTATCTTTG	Arthropoda	Insecta	Thysanoptera	Thripidae	Thrips	Thrips trehernei	2433	0	0	0	0	0	0	0	0	0	0	0	0	0	0	0	0	0	0	0	0	0	0	0	0	0	0	0	0	0	0	0	0	0	0	0	0	0	0	0	0	0
ASV972	ACTGGCAGGACTACAAAGTCATTCAGGAGGATCAATTGATCTAGCTATCTTTAGTCTTCACCTATCAGGTATCTCATCTATGCTAGGTGCTATGAACTTCATGGTAACTATCCTGAATATGCGAGCTTCAGGTATGACAATGTACAAAATGCCACTATTTGTATGGGCAGTATTTGTAACATCAATTCTACTTATTACTACACTA	Arthropoda	Insecta	Trichoptera	Calamoceratidae	Phylloicus	Phylloicus priapulus	43	0	0	0	0	0	0	0	0	0	0	0	0	0	0	0	0	0	0	0	0	0	0	0	0	0	0	0	0	0	0	0	0	0	0	0	0	0	0	0	0	0
ASV973	TTTAGCAAGAAATATCGGTCATATAGGAAGATCCGTAGATTTATCTATTTTTTCCCTCCACATAGCAGGAATTTCTTCAATTTTAGGAGCCATCAATTTTATTACAACTTGCATAAGAATAAAGCCTAAAAGTATACTTTTAGATCAAATACCACTTTTTGTTTGATCAGTTTTAATTACAGCTTTCTTACTTCTTTTATCCCTT	Arthropoda	Insecta	Trichoptera	Leptoceridae	Oecetis	Oecetis pechana	106	0	0	0	0	0	0	0	0	0	0	0	0	0	89	0	0	0	0	0	0	0	0	0	0	0	0	0	0	0	0	0	0	0	0	0	0	0	0	0	0	0
								54314023	110355	155763	114099	170738	59971	149805	140686	163534	81959	137185	31349	121710	8721	40633	190154	88318	36220	10279	17555	23346	8394	67055	78376	123851	158573	1892	143502	147282	83586	7204	69439	146005	221377	182762	144933	78565	161205	194288	244671	244181	149383
[truncated: 409 more columns]
